# Supplementary material for: NAT10-mediated β-hydroxybutyrylation Affects DNA Replication
Source: Research Square preprint supplement (doi:10.21203/rs.3.rs-7110451/v1), 2025-07-24
Supplement: Supplementary file 1 [file 218a6cdba83d66e4786bc13c.xlsx]

## Sheet: protein groups
Protein IDs	Majority protein IDs	Protein names	Gene names	Fasta headers	Identification type 1A	Identification type 1B	Identification type 1C	Identification type 2A	Identification type 2B	Identification type 2C	Identification type 3A	Identification type 3B	Identification type 3C	Identification type 4A	Identification type 4B	Identification type 4C	Identification type 5A	Identification type 5B	Identification type 5C	Identification type 6A	Identification type 6B	Identification type 6C	iBAQ	iBAQ 1A	iBAQ 1B	iBAQ 1C	iBAQ 2A	iBAQ 2B	iBAQ 2C	iBAQ 3A	iBAQ 3B	iBAQ 3C	iBAQ 4A	iBAQ 4B	iBAQ 4C	iBAQ 5A	iBAQ 5B	iBAQ 5C	iBAQ 6A	iBAQ 6B	iBAQ 6C
P62805	P62805	Histone H4	H4C1	sp|P62805|H4_HUMAN Histone H4 OS=Homo sapiens OX=9606 GN=H4C1 PE=1 SV=2	By MS/MS	By MS/MS	By MS/MS	By MS/MS	By MS/MS	By MS/MS	By MS/MS	By MS/MS	By MS/MS	By MS/MS	By MS/MS	By MS/MS	By MS/MS	By MS/MS	By MS/MS	By MS/MS	By MS/MS	By MS/MS	343230000000	35366000000	19599000000	16499000000	15133000000	12838000000	19156000000	24436000000	14053000000	18633000000	13545000000	21183000000	15182000000	12667000000	16777000000	28957000000	15003000000	25943000000	18256000000
Q99880;Q99879;Q99877;Q93079;Q5QNW6;P62807;P58876;P57053;O60814;Q96A08;A0A2R8Y619	Q99880;Q99879;Q99877;Q93079;Q5QNW6;P62807;P58876;P57053;O60814;Q96A08	Histone H2B type 1-L;Histone H2B type 1-M;Histone H2B type 1-N;Histone H2B type 1-H;Histone H2B type 2-F;Histone H2B type 1-C/E/F/G/I;Histone H2B type 1-D;Histone H2B type F-S;Histone H2B type 1-K;Histone H2B type 1-A	H2BC13;H2BC14;H2BC15;H2BC9;H2BC18;H2BC4;H2BC5;H2BC12L;H2BC12;H2BC1	sp|Q99880|H2B1L_HUMAN Histone H2B type 1-L OS=Homo sapiens OX=9606 GN=H2BC13 PE=1 SV=3;sp|Q99879|H2B1M_HUMAN Histone H2B type 1-M OS=Homo sapiens OX=9606 GN=H2BC14 PE=1 SV=3;sp|Q99877|H2B1N_HUMAN Histone H2B type 1-N OS=Homo sapiens OX=9606 GN=H2BC15 PE=1	By MS/MS	By MS/MS	By MS/MS	By MS/MS	By MS/MS	By MS/MS	By MS/MS	By MS/MS	By MS/MS	By MS/MS	By MS/MS	By MS/MS	By MS/MS	By MS/MS	By MS/MS	By MS/MS	By MS/MS	By MS/MS	253560000000	18461000000	17265000000	8.1469e+09	13170000000	9760800000	14765000000	21417000000	12147000000	12848000000	10088000000	19285000000	13794000000	12176000000	13805000000	17095000000	12191000000	13214000000	13928000000
Q71UI9;P0C0S5;Q93077;Q7L7L0;P04908;Q96QV6	Q71UI9;P0C0S5;Q93077;Q7L7L0;P04908;Q96QV6	Histone H2A.V;Histone H2A.Z;Histone H2A type 1-C;Histone H2A type 3;Histone H2A type 1-B/E;Histone H2A type 1-A	H2AZ2;H2AZ1;H2AC6;H2AC25;H2AC4;H2AC1	sp|Q71UI9|H2AV_HUMAN Histone H2A.V OS=Homo sapiens OX=9606 GN=H2AZ2 PE=1 SV=3;sp|P0C0S5|H2AZ_HUMAN Histone H2A.Z OS=Homo sapiens OX=9606 GN=H2AZ1 PE=1 SV=2;sp|Q93077|H2A1C_HUMAN Histone H2A type 1-C OS=Homo sapiens OX=9606 GN=H2AC6 PE=1 SV=3;sp|Q7L7L0|H2A3	By MS/MS	By MS/MS	By MS/MS	By MS/MS	By MS/MS	By MS/MS	By MS/MS	By MS/MS	By MS/MS	By MS/MS	By MS/MS	By MS/MS	By MS/MS	By MS/MS	By MS/MS	By MS/MS	By MS/MS	By MS/MS	235560000000	18589000000	18631000000	4754600000	15420000000	4830200000	16961000000	23191000000	12444000000	14043000000	5585700000	22202000000	14617000000	12073000000	15868000000	8.0493e+09	14075000000	7.2528e+09	6.9758e+09
Q71DI3;P84243;P68431;Q6NXT2;Q16695	Q71DI3;P84243;P68431;Q6NXT2;Q16695	Histone H3.2;Histone H3.3;Histone H3.1;Histone H3.3C;Histone H3.1t	H3C15;H3-3A;H3C1;H3-5;H3-4	sp|Q71DI3|H32_HUMAN Histone H3.2 OS=Homo sapiens OX=9606 GN=H3C15 PE=1 SV=3;sp|P84243|H33_HUMAN Histone H3.3 OS=Homo sapiens OX=9606 GN=H3-3A PE=1 SV=2;sp|P68431|H31_HUMAN Histone H3.1 OS=Homo sapiens OX=9606 GN=H3C1 PE=1 SV=2;sp|Q6NXT2|H3C_HUMAN Histone H	By MS/MS	By MS/MS	By MS/MS	By MS/MS	By MS/MS	By MS/MS	By MS/MS	By MS/MS	By MS/MS	By MS/MS	By MS/MS	By MS/MS	By MS/MS	By MS/MS	By MS/MS	By MS/MS	By MS/MS	By MS/MS	207620000000	15896000000	14722000000	8.0131e+09	10772000000	8.2663e+09	13231000000	16570000000	11158000000	7.7089e+09	9340200000	14557000000	11396000000	9194500000	11072000000	13440000000	9162300000	11127000000	11989000000
P16403;P16402;P22492	P16403;P16402	Histone H1.2;Histone H1.3	H1-2;H1-3	sp|P16403|H12_HUMAN Histone H1.2 OS=Homo sapiens OX=9606 GN=H1-2 PE=1 SV=2;sp|P16402|H13_HUMAN Histone H1.3 OS=Homo sapiens OX=9606 GN=H1-3 PE=1 SV=2	By MS/MS	By MS/MS	By MS/MS	By MS/MS	By MS/MS	By MS/MS	By MS/MS	By MS/MS	By MS/MS	By MS/MS	By MS/MS	By MS/MS	By MS/MS	By MS/MS	By MS/MS	By MS/MS	By MS/MS	By MS/MS	82359000000	6.5098e+09	8.1605e+09	3.2523e+09	5611500000	3.5518e+09	5711200000	9437000000	3.8999e+09	6.139e+09	3.0726e+09	9515000000	3.5193e+09	2433900000	1.8458e+09	2148100000	2382400000	1.9938e+09	3.175e+09
P05387;P05386	P05387	Large ribosomal subunit protein P2	RPLP2	sp|P05387|RLA2_HUMAN Large ribosomal subunit protein P2 OS=Homo sapiens OX=9606 GN=RPLP2 PE=1 SV=1	By MS/MS	By MS/MS	By MS/MS	By MS/MS	By MS/MS	By MS/MS	By MS/MS	By MS/MS	By MS/MS	By MS/MS	By MS/MS	By MS/MS	By MS/MS	By MS/MS	By MS/MS	By MS/MS	By MS/MS	By MS/MS	27595000000	1.5589e+09	1.4927e+09	609850000	1179000000	885590000	1.6653e+09	1375900000	1181600000	1.4912e+09	1361500000	1.9028e+09	1.9379e+09	1299800000	1.6907e+09	2626100000	1.4804e+09	1.7186e+09	2.137e+09
Q16778;P33778;P23527;P06899;Q8N257	Q16778;P33778;P23527;P06899;Q8N257	Histone H2B type 2-E;Histone H2B type 1-B;Histone H2B type 1-O;Histone H2B type 1-J;Histone H2B type 3-B	H2BC21;H2BC3;H2BC17;H2BC11;H2BC26	sp|Q16778|H2B2E_HUMAN Histone H2B type 2-E OS=Homo sapiens OX=9606 GN=H2BC21 PE=1 SV=3;sp|P33778|H2B1B_HUMAN Histone H2B type 1-B OS=Homo sapiens OX=9606 GN=H2BC3 PE=1 SV=2;sp|P23527|H2B1O_HUMAN Histone H2B type 1-O OS=Homo sapiens OX=9606 GN=H2BC17 PE=1 S	By MS/MS	By MS/MS	By MS/MS	By MS/MS	By MS/MS	By MS/MS	By MS/MS	By MS/MS	By MS/MS	By MS/MS	By MS/MS	By MS/MS	By MS/MS	By MS/MS	By MS/MS	By MS/MS	By MS/MS	By MS/MS	23785000000	1.8238e+09	1.8051e+09	641450000	1.4942e+09	488850000	1451200000	1.9629e+09	1319900000	1357100000	925420000	1.8991e+09	1195300000	907510000	1177400000	1.6273e+09	1220700000	1310000000	1178100000
P07305	P07305	Histone H1.0;Histone H1.0, N-terminally processed	H1-0	sp|P07305|H10_HUMAN Histone H1.0 OS=Homo sapiens OX=9606 GN=H1-0 PE=1 SV=3	By MS/MS	By MS/MS	By MS/MS	By MS/MS	By MS/MS	By MS/MS	By MS/MS	By MS/MS	By MS/MS	By MS/MS	By MS/MS	By MS/MS	By MS/MS	By MS/MS	By MS/MS	By MS/MS	By MS/MS	By MS/MS	18001000000	1.4659e+09	1.7418e+09	490300000	1243100000	665890000	1215200000	2244200000	731810000	1.07e+09	570020000	2485800000	691270000	630630000	432900000	557070000	594630000	473030000	696970000
Q9Y3U8	Q9Y3U8	Large ribosomal subunit protein eL36	RPL36	sp|Q9Y3U8|RL36_HUMAN Large ribosomal subunit protein eL36 OS=Homo sapiens OX=9606 GN=RPL36 PE=1 SV=3	By MS/MS	By MS/MS	By MS/MS	By MS/MS	By MS/MS	By MS/MS	By MS/MS	By MS/MS	By MS/MS	By MS/MS	By MS/MS	By MS/MS	By MS/MS	By MS/MS	By MS/MS	By MS/MS	By MS/MS	By MS/MS	15444000000	815360000	1307100000	406190000	767180000	556400000	1147800000	1361500000	675050000	851250000	505900000	1160400000	896340000	780570000	689580000	1.0068e+09	768530000	773770000	974700000
P53999	P53999	Activated RNA polymerase II transcriptional coactivator p15	SUB1	sp|P53999|TCP4_HUMAN Activated RNA polymerase II transcriptional coactivator p15 OS=Homo sapiens OX=9606 GN=SUB1 PE=1 SV=3	By MS/MS	By MS/MS	By MS/MS	By MS/MS	By MS/MS	By MS/MS	By MS/MS	By MS/MS	By MS/MS	By MS/MS	By MS/MS	By MS/MS	By MS/MS	By MS/MS	By MS/MS	By MS/MS	By MS/MS	By MS/MS	11107000000	785980000	1.0433e+09	453270000	609920000	516570000	473820000	1.613e+09	345050000	1286900000	335520000	1.881e+09	446010000	152650000	166000000	275530000	192120000	178230000	351910000
P62750	P62750	Large ribosomal subunit protein uL23	RPL23A	sp|P62750|RL23A_HUMAN Large ribosomal subunit protein uL23 OS=Homo sapiens OX=9606 GN=RPL23A PE=1 SV=1	By MS/MS	By MS/MS	By MS/MS	By MS/MS	By MS/MS	By MS/MS	By MS/MS	By MS/MS	By MS/MS	By MS/MS	By MS/MS	By MS/MS	By MS/MS	By MS/MS	By MS/MS	By MS/MS	By MS/MS	By MS/MS	10165000000	819210000	902650000	315580000	668410000	443300000	745740000	1130800000	378380000	644420000	285730000	1.4932e+09	398480000	338660000	277240000	381950000	305380000	254770000	381200000
P06748	P06748	Nucleophosmin	NPM1	sp|P06748|NPM_HUMAN Nucleophosmin OS=Homo sapiens OX=9606 GN=NPM1 PE=1 SV=2	By MS/MS	By MS/MS	By MS/MS	By MS/MS	By MS/MS	By MS/MS	By MS/MS	By MS/MS	By MS/MS	By MS/MS	By MS/MS	By MS/MS	By MS/MS	By MS/MS	By MS/MS	By MS/MS	By MS/MS	By MS/MS	9603500000	883400000	919770000	311180000	582900000	361420000	754620000	995300000	431180000	227050000	314980000	892380000	506260000	396540000	353010000	459550000	431020000	321840000	461080000
P62851	P62851	Small ribosomal subunit protein eS25	RPS25	sp|P62851|RS25_HUMAN Small ribosomal subunit protein eS25 OS=Homo sapiens OX=9606 GN=RPS25 PE=1 SV=1	By MS/MS	By MS/MS	By MS/MS	By MS/MS	By MS/MS	By MS/MS	By MS/MS	By MS/MS	By MS/MS	By MS/MS	By MS/MS	By MS/MS	By MS/MS	By MS/MS	By MS/MS	By MS/MS	By MS/MS	By MS/MS	8.5166e+09	625680000	813640000	243380000	432260000	473630000	650760000	1.0192e+09	313700000	647120000	198910000	1159500000	384570000	243730000	247140000	304520000	227720000	180840000	350270000
Q8IUE6	Q8IUE6	Histone H2A type 2-B	H2AC21	sp|Q8IUE6|H2A2B_HUMAN Histone H2A type 2-B OS=Homo sapiens OX=9606 GN=H2AC21 PE=1 SV=3	By MS/MS	By MS/MS	By MS/MS	By MS/MS	By MS/MS	By MS/MS	By MS/MS	By MS/MS	By MS/MS	By MS/MS	By MS/MS	By MS/MS	By MS/MS	By MS/MS	By MS/MS	By MS/MS	By MS/MS	By MS/MS	7.939e+09	578890000	781420000	273850000	431830000	265370000	498790000	792760000	371350000	89570000	249210000	881310000	374970000	317160000	397310000	561330000	357270000	378620000	337990000
P62424	P62424	Large ribosomal subunit protein eL8	RPL7A	sp|P62424|RL7A_HUMAN Large ribosomal subunit protein eL8 OS=Homo sapiens OX=9606 GN=RPL7A PE=1 SV=2	By MS/MS	By MS/MS	By MS/MS	By MS/MS	By MS/MS	By MS/MS	By MS/MS	By MS/MS	By MS/MS	By MS/MS	By MS/MS	By MS/MS	By MS/MS	By MS/MS	By MS/MS	By MS/MS	By MS/MS	By MS/MS	7.9216e+09	665170000	719180000	257270000	489350000	301480000	463430000	725840000	350220000	371200000	292540000	647810000	371850000	330730000	365490000	461820000	373640000	343280000	391340000
Q07020	Q07020	Large ribosomal subunit protein eL18	RPL18	sp|Q07020|RL18_HUMAN Large ribosomal subunit protein eL18 OS=Homo sapiens OX=9606 GN=RPL18 PE=1 SV=2	By MS/MS	By MS/MS	By MS/MS	By MS/MS	By MS/MS	By MS/MS	By MS/MS	By MS/MS	By MS/MS	By MS/MS	By MS/MS	By MS/MS	By MS/MS	By MS/MS	By MS/MS	By MS/MS	By MS/MS	By MS/MS	7.814e+09	691860000	752940000	298920000	473180000	281680000	539650000	811680000	305110000	590500000	282780000	880440000	288420000	267730000	221480000	346790000	180510000	294030000	306250000
P61353	P61353	Large ribosomal subunit protein eL27	RPL27	sp|P61353|RL27_HUMAN Large ribosomal subunit protein eL27 OS=Homo sapiens OX=9606 GN=RPL27 PE=1 SV=2	By MS/MS	By MS/MS	By MS/MS	By MS/MS	By MS/MS	By MS/MS	By MS/MS	By MS/MS	By MS/MS	By MS/MS	By MS/MS	By MS/MS	By MS/MS	By MS/MS	By MS/MS	By MS/MS	By MS/MS	By MS/MS	7.0603e+09	522810000	471370000	127930000	305070000	225980000	604850000	523190000	281360000	388000000	256050000	616440000	404640000	303850000	411870000	544340000	428150000	382430000	262020000
P62899	P62899	Large ribosomal subunit protein eL31	RPL31	sp|P62899|RL31_HUMAN Large ribosomal subunit protein eL31 OS=Homo sapiens OX=9606 GN=RPL31 PE=1 SV=1	By MS/MS	By MS/MS	By MS/MS	By MS/MS	By MS/MS	By MS/MS	By MS/MS	By MS/MS	By MS/MS	By MS/MS	By MS/MS	By MS/MS	By MS/MS	By MS/MS	By MS/MS	By MS/MS	By MS/MS	By MS/MS	6.4629e+09	426560000	580350000	221110000	365580000	305240000	489890000	824180000	188260000	538060000	182510000	881940000	293050000	182200000	177140000	192530000	188210000	148150000	277900000
P19338	P19338	Nucleolin	NCL	sp|P19338|NUCL_HUMAN Nucleolin OS=Homo sapiens OX=9606 GN=NCL PE=1 SV=3	By MS/MS	By MS/MS	By MS/MS	By MS/MS	By MS/MS	By MS/MS	By MS/MS	By MS/MS	By MS/MS	By MS/MS	By MS/MS	By MS/MS	By MS/MS	By MS/MS	By MS/MS	By MS/MS	By MS/MS	By MS/MS	5.9383e+09	430880000	530280000	199540000	448660000	205320000	402400000	751390000	219500000	455700000	169250000	837500000	253910000	168810000	150520000	182830000	166610000	154030000	211140000
Q5TEC6	Q5TEC6	Histone H3-7	H3-7	sp|Q5TEC6|H37_HUMAN Histone H3-7 OS=Homo sapiens OX=9606 GN=H3-7 PE=1 SV=1	By MS/MS	By MS/MS	By MS/MS	By MS/MS	By MS/MS	By MS/MS	By MS/MS	By MS/MS	By MS/MS	By MS/MS	By MS/MS	By MS/MS	By MS/MS	By MS/MS	By MS/MS	By MS/MS	By MS/MS	By MS/MS	5262300000	573680000	428670000	170770000	250210000	141080000	314670000	609320000	168140000	296280000	202730000	448130000	195280000	185100000	225500000	342700000	200990000	255690000	253310000
P62861	P62861	Ubiquitin-like FUBI-ribosomal protein eS30 fusion protein;Ubiquitin-like protein FUBI;Small ribosomal subunit protein eS30	FAU	sp|P62861|RS30_HUMAN Ubiquitin-like FUBI-ribosomal protein eS30 fusion protein OS=Homo sapiens OX=9606 GN=FAU PE=1 SV=2	By MS/MS	By MS/MS	By MS/MS	By MS/MS	By MS/MS	By MS/MS	By MS/MS	By MS/MS	By MS/MS	By MS/MS	By MS/MS	By MS/MS	By MS/MS	By MS/MS	By MS/MS	By MS/MS	By MS/MS	By MS/MS	5239200000	341490000	453430000	191900000	324470000	229440000	355530000	546700000	197490000	589950000	159720000	676480000	274350000	150220000	118940000	155450000	137810000	108220000	227580000
P26373	P26373	Large ribosomal subunit protein eL13	RPL13	sp|P26373|RL13_HUMAN Large ribosomal subunit protein eL13 OS=Homo sapiens OX=9606 GN=RPL13 PE=1 SV=4	By MS/MS	By MS/MS	By MS/MS	By MS/MS	By MS/MS	By MS/MS	By MS/MS	By MS/MS	By MS/MS	By MS/MS	By MS/MS	By MS/MS	By MS/MS	By MS/MS	By MS/MS	By MS/MS	By MS/MS	By MS/MS	4758200000	364050000	496520000	158060000	291070000	208810000	332890000	495020000	173110000	372390000	144510000	545130000	205310000	169190000	153650000	183490000	129670000	134560000	200730000
P42766	P42766	Large ribosomal subunit protein uL29	RPL35	sp|P42766|RL35_HUMAN Large ribosomal subunit protein uL29 OS=Homo sapiens OX=9606 GN=RPL35 PE=1 SV=2	By MS/MS	By MS/MS	By MS/MS	By MS/MS	By MS/MS	By MS/MS	By MS/MS	By MS/MS	By MS/MS	By MS/MS	By MS/MS	By MS/MS	By MS/MS	By MS/MS	By MS/MS	By MS/MS	By MS/MS	By MS/MS	4388200000	360790000	342250000	128140000	295260000	155630000	354830000	516490000	161010000	208840000	118430000	575490000	216810000	176430000	184870000	190410000	120210000	124980000	157300000
P49207	P49207	Large ribosomal subunit protein eL34	RPL34	sp|P49207|RL34_HUMAN Large ribosomal subunit protein eL34 OS=Homo sapiens OX=9606 GN=RPL34 PE=1 SV=3	By MS/MS	By MS/MS	By MS/MS	By MS/MS	By MS/MS	By MS/MS	By MS/MS	By MS/MS	By MS/MS	By MS/MS	By MS/MS	By MS/MS	By MS/MS	By MS/MS	By MS/MS	By MS/MS	By MS/MS	By MS/MS	4.128e+09	330570000	367830000	135600000	218800000	157570000	306300000	383780000	166590000	196260000	151230000	399930000	208440000	153520000	192910000	246500000	169680000	160500000	181950000
Q9UNX3	Q9UNX3	Ribosomal protein uL24-like	RPL26L1	sp|Q9UNX3|RL26L_HUMAN Ribosomal protein uL24-like OS=Homo sapiens OX=9606 GN=RPL26L1 PE=1 SV=1	By MS/MS	By MS/MS	By MS/MS	By MS/MS	By MS/MS	By MS/MS	By MS/MS	By MS/MS	By MS/MS	By MS/MS	By MS/MS	By MS/MS	By MS/MS	By MS/MS	By MS/MS	By MS/MS	By MS/MS	By MS/MS	4.0631e+09	279280000	324970000	103600000	207740000	134570000	284760000	464180000	108200000	242160000	107960000	546080000	216730000	162220000	172060000	206580000	153290000	151900000	196800000
P62906	P62906	Large ribosomal subunit protein uL1	RPL10A	sp|P62906|RL10A_HUMAN Large ribosomal subunit protein uL1 OS=Homo sapiens OX=9606 GN=RPL10A PE=1 SV=2	By MS/MS	By MS/MS	By MS/MS	By MS/MS	By MS/MS	By MS/MS	By MS/MS	By MS/MS	By MS/MS	By MS/MS	By MS/MS	By MS/MS	By MS/MS	By MS/MS	By MS/MS	By MS/MS	By MS/MS	By MS/MS	3.7894e+09	298970000	317160000	132860000	211840000	172920000	245110000	366530000	137310000	264500000	124940000	471380000	175780000	131320000	113070000	169570000	144450000	136250000	175400000
P62269	P62269	Small ribosomal subunit protein uS13	RPS18	sp|P62269|RS18_HUMAN Small ribosomal subunit protein uS13 OS=Homo sapiens OX=9606 GN=RPS18 PE=1 SV=3	By MS/MS	By MS/MS	By MS/MS	By MS/MS	By MS/MS	By MS/MS	By MS/MS	By MS/MS	By MS/MS	By MS/MS	By MS/MS	By MS/MS	By MS/MS	By MS/MS	By MS/MS	By MS/MS	By MS/MS	By MS/MS	3.6534e+09	309970000	369450000	142540000	190320000	181300000	272300000	401960000	151680000	262320000	127650000	430140000	156080000	101430000	91981000	142980000	83347000	93613000	144360000
P62987;P62979;P0CG47;P0CG48	P62987;P62979;P0CG47;P0CG48	Ubiquitin-ribosomal protein eL40 fusion protein;Ubiquitin;Large ribosomal subunit protein eL40;Ubiquitin-ribosomal protein eS31 fusion protein;Ubiquitin;Small ribosomal subunit protein eS31;Polyubiquitin-B;Ubiquitin;Polyubiquitin-C;Ubiquitin	UBA52;RPS27A;UBB;UBC	sp|P62987|RL40_HUMAN Ubiquitin-ribosomal protein eL40 fusion protein OS=Homo sapiens OX=9606 GN=UBA52 PE=1 SV=2;sp|P62979|RS27A_HUMAN Ubiquitin-ribosomal protein eS31 fusion protein OS=Homo sapiens OX=9606 GN=RPS27A PE=1 SV=2;sp|P0CG47|UBB_HUMAN Polyubiqui	By MS/MS	By MS/MS	By MS/MS	By MS/MS	By MS/MS	By MS/MS	By MS/MS	By MS/MS	By MS/MS	By MS/MS	By MS/MS	By MS/MS	By MS/MS	By MS/MS	By MS/MS	By MS/MS	By MS/MS	By MS/MS	3.6165e+09	415930000	319790000	129780000	235970000	92271000	176130000	530110000	142860000	261970000	109410000	439930000	169970000	74079000	107490000	136070000	78302000	91063000	105340000
P39019	P39019	Small ribosomal subunit protein eS19	RPS19	sp|P39019|RS19_HUMAN Small ribosomal subunit protein eS19 OS=Homo sapiens OX=9606 GN=RPS19 PE=1 SV=2	By MS/MS	By MS/MS	By MS/MS	By MS/MS	By MS/MS	By MS/MS	By MS/MS	By MS/MS	By MS/MS	By MS/MS	By MS/MS	By MS/MS	By MS/MS	By MS/MS	By MS/MS	By MS/MS	By MS/MS	By MS/MS	3.5683e+09	230680000	308710000	102540000	202380000	173090000	329050000	337780000	123180000	259410000	112170000	398170000	162580000	150110000	123010000	152060000	119600000	98950000	184850000
P63261;P60709;Q6S8J3;A5A3E0;Q9BYX7;P0CG39;P0CG38	P63261;P60709	Actin, cytoplasmic 2;Actin, cytoplasmic 2, N-terminally processed;Actin, cytoplasmic 1;Actin, cytoplasmic 1, N-terminally processed	ACTG1;ACTB	sp|P63261|ACTG_HUMAN Actin, cytoplasmic 2 OS=Homo sapiens OX=9606 GN=ACTG1 PE=1 SV=1;sp|P60709|ACTB_HUMAN Actin, cytoplasmic 1 OS=Homo sapiens OX=9606 GN=ACTB PE=1 SV=1	By MS/MS	By MS/MS	By MS/MS	By MS/MS	By MS/MS	By MS/MS	By MS/MS	By MS/MS	By MS/MS	By MS/MS	By MS/MS	By MS/MS	By MS/MS	By MS/MS	By MS/MS	By MS/MS	By MS/MS	By MS/MS	2907400000	364240000	186450000	237900000	139870000	166930000	125120000	255830000	98306000	154570000	103590000	190270000	125660000	46651000	118280000	153780000	81121000	197690000	161150000
P46776	P46776	Large ribosomal subunit protein uL15	RPL27A	sp|P46776|RL27A_HUMAN Large ribosomal subunit protein uL15 OS=Homo sapiens OX=9606 GN=RPL27A PE=1 SV=2	By MS/MS	By MS/MS	By MS/MS	By MS/MS	By MS/MS	By MS/MS	By MS/MS	By MS/MS	By MS/MS	By MS/MS	By MS/MS	By MS/MS	By MS/MS	By MS/MS	By MS/MS	By MS/MS	By MS/MS	By MS/MS	2726000000	208070000	237460000	47232000	140230000	109880000	203550000	268330000	91505000	244690000	73681000	363540000	122040000	93587000	96134000	129340000	81253000	93753000	121680000
P62277	P62277	Small ribosomal subunit protein uS15	RPS13	sp|P62277|RS13_HUMAN Small ribosomal subunit protein uS15 OS=Homo sapiens OX=9606 GN=RPS13 PE=1 SV=2	By MS/MS	By MS/MS	By MS/MS	By MS/MS	By MS/MS	By MS/MS	By MS/MS	By MS/MS	By MS/MS	By MS/MS	By MS/MS	By MS/MS	By MS/MS	By MS/MS	By MS/MS	By MS/MS	By MS/MS	By MS/MS	2650800000	182600000	197690000	90848000	125680000	138350000	192610000	319340000	103390000	191370000	90309000	276250000	115250000	93027000	102520000	133880000	81207000	58929000	157580000
Q02878	Q02878	Large ribosomal subunit protein eL6	RPL6	sp|Q02878|RL6_HUMAN Large ribosomal subunit protein eL6 OS=Homo sapiens OX=9606 GN=RPL6 PE=1 SV=3	By MS/MS	By MS/MS	By MS/MS	By MS/MS	By MS/MS	By MS/MS	By MS/MS	By MS/MS	By MS/MS	By MS/MS	By MS/MS	By MS/MS	By MS/MS	By MS/MS	By MS/MS	By MS/MS	By MS/MS	By MS/MS	2587000000	222900000	233260000	103020000	161160000	110010000	176620000	314870000	99423000	150220000	77059000	327450000	101750000	74520000	70951000	105480000	72154000	83073000	103120000
Q01105;P0DME0	Q01105;P0DME0	Protein SET;Protein SETSIP	SET;SETSIP	sp|Q01105|SET_HUMAN Protein SET OS=Homo sapiens OX=9606 GN=SET PE=1 SV=3;sp|P0DME0|SETLP_HUMAN Protein SETSIP OS=Homo sapiens OX=9606 GN=SETSIP PE=1 SV=2	By MS/MS	By MS/MS	By MS/MS	By MS/MS	By MS/MS	By MS/MS	By MS/MS	By MS/MS	By MS/MS	By MS/MS	By MS/MS	By MS/MS	By MS/MS	By MS/MS	By MS/MS	By MS/MS	By MS/MS	By MS/MS	2493100000	114570000	89301000	50807000	104740000	64712000	221010000	93185000	93932000	61048000	102170000	104370000	169290000	156350000	217210000	251070000	191140000	161030000	247170000
P62857	P62857	Small ribosomal subunit protein eS28	RPS28	sp|P62857|RS28_HUMAN Small ribosomal subunit protein eS28 OS=Homo sapiens OX=9606 GN=RPS28 PE=1 SV=1	By MS/MS	By MS/MS	By MS/MS	By MS/MS	By MS/MS	By MS/MS	By MS/MS	By MS/MS	By MS/MS	By MS/MS	By MS/MS	By MS/MS	By MS/MS	By MS/MS	By MS/MS	By MS/MS	By MS/MS	By MS/MS	2400300000	124350000	184120000	81243000	126160000	147130000	181940000	198470000	105080000	154930000	91767000	304300000	140150000	96039000	88548000	92143000	85578000	66401000	131910000
P17096	P17096	High mobility group protein HMG-I/HMG-Y	HMGA1	sp|P17096|HMGA1_HUMAN High mobility group protein HMG-I/HMG-Y OS=Homo sapiens OX=9606 GN=HMGA1 PE=1 SV=3	By MS/MS	By MS/MS	By MS/MS	By MS/MS	By MS/MS	By MS/MS	By MS/MS	By MS/MS	By MS/MS	By MS/MS	By MS/MS	By MS/MS	By MS/MS	By MS/MS	By MS/MS	By MS/MS	By MS/MS	By MS/MS	2294500000	194700000	266870000	114030000	156730000	79304000	128660000	326400000	77672000	130620000	41730000	509350000	78891000	42523000	16297000	28885000	27873000	26440000	47556000
Q92522	Q92522	Histone H1.10	H1-10	sp|Q92522|H1X_HUMAN Histone H1.10 OS=Homo sapiens OX=9606 GN=H1-10 PE=1 SV=1	By MS/MS	By MS/MS	By MS/MS	By MS/MS	By MS/MS	By MS/MS	By MS/MS	By MS/MS	By MS/MS	By MS/MS	By MS/MS	By MS/MS	By MS/MS	By MS/MS	By MS/MS	By MS/MS	By MS/MS	By MS/MS	2269900000	168620000	203200000	74818000	150710000	69543000	149530000	296180000	96448000	217410000	77210000	367750000	100590000	55635000	37888000	50625000	43890000	39757000	70131000
P83731	P83731	Large ribosomal subunit protein eL24	RPL24	sp|P83731|RL24_HUMAN Large ribosomal subunit protein eL24 OS=Homo sapiens OX=9606 GN=RPL24 PE=1 SV=1	By MS/MS	By MS/MS	By MS/MS	By MS/MS	By MS/MS	By MS/MS	By MS/MS	By MS/MS	By MS/MS	By MS/MS	By MS/MS	By MS/MS	By MS/MS	By MS/MS	By MS/MS	By MS/MS	By MS/MS	By MS/MS	2236600000	157300000	180400000	90624000	130410000	105020000	126060000	266970000	71833000	243900000	67695000	316410000	86154000	58841000	54709000	65385000	54541000	66368000	93944000
P62888	P62888	Large ribosomal subunit protein eL30	RPL30	sp|P62888|RL30_HUMAN Large ribosomal subunit protein eL30 OS=Homo sapiens OX=9606 GN=RPL30 PE=1 SV=2	By MS/MS	By MS/MS	By MS/MS	By MS/MS	By MS/MS	By MS/MS	By MS/MS	By MS/MS	By MS/MS	By MS/MS	By MS/MS	By MS/MS	By MS/MS	By MS/MS	By MS/MS	By MS/MS	By MS/MS	By MS/MS	2150000000	131130000	151770000	49999000	107020000	42841000	154850000	175690000	103090000	32946000	65719000	169770000	129310000	151990000	125450000	171070000	138870000	127250000	121190000
P47914	P47914	Large ribosomal subunit protein eL29	RPL29	sp|P47914|RL29_HUMAN Large ribosomal subunit protein eL29 OS=Homo sapiens OX=9606 GN=RPL29 PE=1 SV=2	By MS/MS	By MS/MS	By MS/MS	By MS/MS	By MS/MS	By MS/MS	By MS/MS	By MS/MS	By MS/MS	By MS/MS	By MS/MS	By MS/MS	By MS/MS	By MS/MS	By MS/MS	By MS/MS	By MS/MS	By MS/MS	2.0829e+09	211500000	229070000	77051000	131830000	74591000	172330000	211080000	85974000	104920000	62098000	259420000	69427000	76102000	62357000	69527000	58004000	57475000	70188000
P09429;B2RPK0;P23497	P09429;B2RPK0	High mobility group protein B1;Putative high mobility group protein B1-like 1	HMGB1;HMGB1P1	sp|P09429|HMGB1_HUMAN High mobility group protein B1 OS=Homo sapiens OX=9606 GN=HMGB1 PE=1 SV=3;sp|B2RPK0|HGB1A_HUMAN Putative high mobility group protein B1-like 1 OS=Homo sapiens OX=9606 GN=HMGB1P1 PE=5 SV=1	By MS/MS	By MS/MS	By MS/MS	By MS/MS	By MS/MS	By MS/MS	By MS/MS	By MS/MS	By MS/MS	By MS/MS	By MS/MS	By MS/MS	By MS/MS	By MS/MS	By MS/MS	By MS/MS	By MS/MS	By MS/MS	2.0745e+09	75126000	95990000	40674000	70325000	38076000	174040000	67644000	115980000	64286000	78352000	155440000	159650000	177800000	107260000	156190000	131500000	158660000	207460000
P07910;P0DMR1;O60812;B7ZW38;B2RXH8	P07910;P0DMR1;O60812;B7ZW38;B2RXH8	Heterogeneous nuclear ribonucleoproteins C1/C2;Heterogeneous nuclear ribonucleoprotein C-like 4;Heterogeneous nuclear ribonucleoprotein C-like 1;Heterogeneous nuclear ribonucleoprotein C-like 3;Heterogeneous nuclear ribonucleoprotein C-like 2	HNRNPC;HNRNPCL4;HNRNPCL1;HNRNPCL3;HNRNPCL2	sp|P07910|HNRPC_HUMAN Heterogeneous nuclear ribonucleoproteins C1/C2 OS=Homo sapiens OX=9606 GN=HNRNPC PE=1 SV=4;sp|P0DMR1|HNRC4_HUMAN Heterogeneous nuclear ribonucleoprotein C-like 4 OS=Homo sapiens OX=9606 GN=HNRNPCL4 PE=3 SV=1;sp|O60812|HNRC1_HUMAN Hete	By MS/MS	By MS/MS	By MS/MS	By MS/MS	By MS/MS	By MS/MS	By MS/MS	By MS/MS	By MS/MS	By MS/MS	By MS/MS	By MS/MS	By MS/MS	By MS/MS	By MS/MS	By MS/MS	By MS/MS	By MS/MS	2.0392e+09	166210000	165880000	96140000	118360000	65192000	110580000	190480000	52107000	104200000	49665000	176550000	81940000	70293000	133910000	156910000	101300000	102380000	97103000
P46781	P46781	Small ribosomal subunit protein uS4	RPS9	sp|P46781|RS9_HUMAN Small ribosomal subunit protein uS4 OS=Homo sapiens OX=9606 GN=RPS9 PE=1 SV=3	By MS/MS	By MS/MS	By MS/MS	By MS/MS	By MS/MS	By MS/MS	By MS/MS	By MS/MS	By MS/MS	By MS/MS	By MS/MS	By MS/MS	By MS/MS	By MS/MS	By MS/MS	By MS/MS	By MS/MS	By MS/MS	2.0317e+09	168590000	151290000	79301000	89622000	134750000	118410000	245010000	71101000	168940000	66816000	241610000	77514000	54372000	72850000	96629000	32811000	88533000	73547000
O75367	O75367	Core histone macro-H2A.1	MACROH2A1	sp|O75367|H2AY_HUMAN Core histone macro-H2A.1 OS=Homo sapiens OX=9606 GN=MACROH2A1 PE=1 SV=5	By MS/MS	By MS/MS	By MS/MS	By MS/MS	By MS/MS	By MS/MS	By MS/MS	By MS/MS	By MS/MS	By MS/MS	By MS/MS	By MS/MS	By MS/MS	By MS/MS	By MS/MS	By MS/MS	By MS/MS	By MS/MS	2.019e+09	143510000	164330000	53004000	110220000	54108000	128930000	198980000	86677000	126020000	64428000	210540000	101040000	73867000	96768000	122720000	97090000	94591000	92191000
P46777	P46777	Large ribosomal subunit protein uL18	RPL5	sp|P46777|RL5_HUMAN Large ribosomal subunit protein uL18 OS=Homo sapiens OX=9606 GN=RPL5 PE=1 SV=3	By MS/MS	By MS/MS	By MS/MS	By MS/MS	By MS/MS	By MS/MS	By MS/MS	By MS/MS	By MS/MS	By MS/MS	By MS/MS	By MS/MS	By MS/MS	By MS/MS	By MS/MS	By MS/MS	By MS/MS	By MS/MS	1.8659e+09	169680000	164380000	67498000	117310000	70781000	115890000	161140000	70690000	105850000	55229000	197480000	79471000	66114000	69907000	111500000	71064000	90414000	81562000
P07355;A6NMY6	P07355;A6NMY6	Annexin A2;Putative annexin A2-like protein	ANXA2;ANXA2P2	sp|P07355|ANXA2_HUMAN Annexin A2 OS=Homo sapiens OX=9606 GN=ANXA2 PE=1 SV=2;sp|A6NMY6|AXA2L_HUMAN Putative annexin A2-like protein OS=Homo sapiens OX=9606 GN=ANXA2P2 PE=5 SV=2	By MS/MS	By MS/MS	By MS/MS	By MS/MS	By MS/MS	By MS/MS	By MS/MS	By MS/MS	By MS/MS	By MS/MS	By MS/MS	By MS/MS	By MS/MS	By MS/MS	By MS/MS	By MS/MS	By MS/MS	By MS/MS	1.8551e+09	175610000	131210000	161290000	79086000	168760000	59335000	207610000	70730000	161460000	87748000	112020000	72048000	21785000	66138000	98711000	27027000	70888000	83628000
P62249	P62249	Small ribosomal subunit protein uS9	RPS16	sp|P62249|RS16_HUMAN Small ribosomal subunit protein uS9 OS=Homo sapiens OX=9606 GN=RPS16 PE=1 SV=2	By MS/MS	By MS/MS	By MS/MS	By MS/MS	By MS/MS	By MS/MS	By MS/MS	By MS/MS	By MS/MS	By MS/MS	By MS/MS	By MS/MS	By MS/MS	By MS/MS	By MS/MS	By MS/MS	By MS/MS	By MS/MS	1.8415e+09	150880000	184290000	67326000	120540000	106410000	135300000	193460000	70120000	125100000	64649000	141810000	76296000	56569000	65962000	71062000	54083000	62872000	94766000
P61803	P61803	Dolichyl-diphosphooligosaccharide--protein glycosyltransferase subunit DAD1	DAD1	sp|P61803|DAD1_HUMAN Dolichyl-diphosphooligosaccharide--protein glycosyltransferase subunit DAD1 OS=Homo sapiens OX=9606 GN=DAD1 PE=1 SV=3	By MS/MS	By MS/MS	By MS/MS	By MS/MS	By MS/MS	By MS/MS	By MS/MS	By MS/MS	By MS/MS	By MS/MS	By MS/MS	By MS/MS	By MS/MS	By MS/MS	By MS/MS	By MS/MS	By MS/MS	By MS/MS	1.8142e+09	149780000	84765000	145950000	45381000	128080000	61188000	109210000	62109000	128430000	57179000	129260000	142040000	38661000	82054000	164510000	59625000	100670000	125330000
Q01130;Q9BRL6	Q01130	Serine/arginine-rich splicing factor 2	SRSF2	sp|Q01130|SRSF2_HUMAN Serine/arginine-rich splicing factor 2 OS=Homo sapiens OX=9606 GN=SRSF2 PE=1 SV=4	By MS/MS	By MS/MS	By MS/MS	By MS/MS	By MS/MS	By MS/MS	By MS/MS	By MS/MS	By MS/MS	By MS/MS	By MS/MS	By MS/MS	By MS/MS	By MS/MS	By MS/MS	By MS/MS	By MS/MS	By MS/MS	1.6427e+09	69784000	55285000	25942000	73388000	43006000	120030000	109550000	77901000	68907000	74444000	115510000	110440000	74889000	100080000	181900000	127170000	97651000	116800000
P36578	P36578	Large ribosomal subunit protein uL4	RPL4	sp|P36578|RL4_HUMAN Large ribosomal subunit protein uL4 OS=Homo sapiens OX=9606 GN=RPL4 PE=1 SV=5	By MS/MS	By MS/MS	By MS/MS	By MS/MS	By MS/MS	By MS/MS	By MS/MS	By MS/MS	By MS/MS	By MS/MS	By MS/MS	By MS/MS	By MS/MS	By MS/MS	By MS/MS	By MS/MS	By MS/MS	By MS/MS	1.6382e+09	113440000	169520000	63128000	98644000	58209000	126840000	188340000	79520000	73402000	57003000	167020000	77921000	59589000	52029000	77023000	42601000	51313000	82645000
P62913	P62913	Large ribosomal subunit protein uL5	RPL11	sp|P62913|RL11_HUMAN Large ribosomal subunit protein uL5 OS=Homo sapiens OX=9606 GN=RPL11 PE=1 SV=2	By MS/MS	By MS/MS	By MS/MS	By MS/MS	By MS/MS	By MS/MS	By MS/MS	By MS/MS	By MS/MS	By MS/MS	By MS/MS	By MS/MS	By MS/MS	By MS/MS	By MS/MS	By MS/MS	By MS/MS	By MS/MS	1.6152e+09	124030000	137460000	52337000	87023000	71086000	115770000	186120000	57283000	120940000	46453000	199320000	62405000	48814000	56681000	72320000	51706000	54434000	70984000
P18124	P18124	Large ribosomal subunit protein uL30	RPL7	sp|P18124|RL7_HUMAN Large ribosomal subunit protein uL30 OS=Homo sapiens OX=9606 GN=RPL7 PE=1 SV=1	By MS/MS	By MS/MS	By MS/MS	By MS/MS	By MS/MS	By MS/MS	By MS/MS	By MS/MS	By MS/MS	By MS/MS	By MS/MS	By MS/MS	By MS/MS	By MS/MS	By MS/MS	By MS/MS	By MS/MS	By MS/MS	1.5695e+09	150000000	134650000	70924000	88623000	84444000	99329000	172430000	48117000	121610000	47004000	181830000	65275000	33149000	50757000	71529000	38808000	55994000	55040000
P46779	P46779	Large ribosomal subunit protein eL28	RPL28	sp|P46779|RL28_HUMAN Large ribosomal subunit protein eL28 OS=Homo sapiens OX=9606 GN=RPL28 PE=1 SV=3	By MS/MS	By MS/MS	By MS/MS	By MS/MS	By MS/MS	By MS/MS	By MS/MS	By MS/MS	By MS/MS	By MS/MS	By MS/MS	By MS/MS	By MS/MS	By MS/MS	By MS/MS	By MS/MS	By MS/MS	By MS/MS	1.5296e+09	157110000	80231000	73293000	85077000	80302000	125760000	196430000	87887000	10742000	18695000	153920000	49142000	76586000	36597000	71380000	55473000	62944000	108070000
P62241	P62241	Small ribosomal subunit protein eS8	RPS8	sp|P62241|RS8_HUMAN Small ribosomal subunit protein eS8 OS=Homo sapiens OX=9606 GN=RPS8 PE=1 SV=2	By MS/MS	By MS/MS	By MS/MS	By MS/MS	By MS/MS	By MS/MS	By MS/MS	By MS/MS	By MS/MS	By MS/MS	By MS/MS	By MS/MS	By MS/MS	By MS/MS	By MS/MS	By MS/MS	By MS/MS	By MS/MS	1.5157e+09	111980000	102200000	50277000	80575000	70221000	118070000	167710000	54808000	120490000	45551000	176400000	62802000	52907000	63636000	73756000	40035000	65720000	58605000
P62917	P62917	Large ribosomal subunit protein uL2	RPL8	sp|P62917|RL8_HUMAN Large ribosomal subunit protein uL2 OS=Homo sapiens OX=9606 GN=RPL8 PE=1 SV=2	By MS/MS	By MS/MS	By MS/MS	By MS/MS	By MS/MS	By MS/MS	By MS/MS	By MS/MS	By MS/MS	By MS/MS	By MS/MS	By MS/MS	By MS/MS	By MS/MS	By MS/MS	By MS/MS	By MS/MS	By MS/MS	1.5091e+09	133130000	151500000	51885000	94528000	60454000	115450000	176110000	75697000	39363000	50900000	181610000	74953000	59849000	50925000	52020000	44320000	50704000	45691000
P61313	P61313	Large ribosomal subunit protein eL15	RPL15	sp|P61313|RL15_HUMAN Large ribosomal subunit protein eL15 OS=Homo sapiens OX=9606 GN=RPL15 PE=1 SV=2	By MS/MS	By MS/MS	By MS/MS	By MS/MS	By MS/MS	By MS/MS	By MS/MS	By MS/MS	By MS/MS	By MS/MS	By MS/MS	By MS/MS	By MS/MS	By MS/MS	By MS/MS	By MS/MS	By MS/MS	By MS/MS	1.4607e+09	149810000	140420000	50090000	88921000	52802000	87993000	141820000	53323000	79768000	47220000	131810000	64926000	50021000	61424000	84187000	54119000	60443000	61640000
P50914	P50914	Large ribosomal subunit protein eL14	RPL14	sp|P50914|RL14_HUMAN Large ribosomal subunit protein eL14 OS=Homo sapiens OX=9606 GN=RPL14 PE=1 SV=4	By MS/MS	By MS/MS	By MS/MS	By MS/MS	By MS/MS	By MS/MS	By MS/MS	By MS/MS	By MS/MS	By MS/MS	By MS/MS	By MS/MS	By MS/MS	By MS/MS	By MS/MS	By MS/MS	By MS/MS	By MS/MS	1426700000	134970000	131920000	61127000	96665000	36370000	107660000	154590000	77815000	83606000	43115000	110720000	50861000	76519000	38782000	57553000	44607000	60522000	59318000
P62910	P62910	Large ribosomal subunit protein eL32	RPL32	sp|P62910|RL32_HUMAN Large ribosomal subunit protein eL32 OS=Homo sapiens OX=9606 GN=RPL32 PE=1 SV=2	By MS/MS	By MS/MS	By MS/MS	By MS/MS	By MS/MS	By MS/MS	By MS/MS	By MS/MS	By MS/MS	By MS/MS	By MS/MS	By MS/MS	By MS/MS	By MS/MS	By MS/MS	By MS/MS	By MS/MS	By MS/MS	1412100000	141080000	165300000	53914000	86031000	52187000	98657000	196080000	61294000	43820000	38405000	166630000	52314000	41825000	36232000	51680000	34942000	39373000	52313000
P07437;Q9BVA1;Q13885	P07437;Q9BVA1;Q13885	Tubulin beta chain;Tubulin beta-2B chain;Tubulin beta-2A chain	TUBB;TUBB2B;TUBB2A	sp|P07437|TBB5_HUMAN Tubulin beta chain OS=Homo sapiens OX=9606 GN=TUBB PE=1 SV=2;sp|Q9BVA1|TBB2B_HUMAN Tubulin beta-2B chain OS=Homo sapiens OX=9606 GN=TUBB2B PE=1 SV=1;sp|Q13885|TBB2A_HUMAN Tubulin beta-2A chain OS=Homo sapiens OX=9606 GN=TUBB2A PE=1 SV=	By MS/MS	By MS/MS	By MS/MS	By MS/MS	By MS/MS	By MS/MS	By MS/MS	By MS/MS	By MS/MS	By MS/MS	By MS/MS	By MS/MS	By MS/MS	By MS/MS	By MS/MS	By MS/MS	By MS/MS	By MS/MS	1368300000	214870000	54261000	76992000	51278000	70894000	65506000	53660000	36659000	69266000	51305000	61728000	60333000	17550000	95205000	101900000	41633000	169780000	75501000
P62263	P62263	Small ribosomal subunit protein uS11	RPS14	sp|P62263|RS14_HUMAN Small ribosomal subunit protein uS11 OS=Homo sapiens OX=9606 GN=RPS14 PE=1 SV=3	By MS/MS	By MS/MS	By MS/MS	By MS/MS	By MS/MS	By MS/MS	By MS/MS	By MS/MS	By MS/MS	By MS/MS	By MS/MS	By MS/MS	By MS/MS	By MS/MS	By MS/MS	By MS/MS	By MS/MS	By MS/MS	1346200000	108320000	116790000	46883000	79213000	62562000	94476000	175400000	50191000	86528000	37256000	160880000	56676000	39456000	49459000	54011000	32030000	42409000	53685000
P62854;Q5JNZ5	P62854;Q5JNZ5	Small ribosomal subunit protein eS26;Putative ribosomal protein eS26-like	RPS26;RPS26P11	sp|P62854|RS26_HUMAN Small ribosomal subunit protein eS26 OS=Homo sapiens OX=9606 GN=RPS26 PE=1 SV=3;sp|Q5JNZ5|RS26L_HUMAN Putative ribosomal protein eS26-like OS=Homo sapiens OX=9606 GN=RPS26P11 PE=5 SV=1	By MS/MS	By MS/MS	By MS/MS	By MS/MS	By MS/MS	By MS/MS	By MS/MS	By MS/MS	By MS/MS	By MS/MS	By MS/MS	By MS/MS	By MS/MS	By MS/MS	By MS/MS	By MS/MS	By MS/MS	By MS/MS	1330500000	101140000	110040000	51847000	81128000	96684000	70664000	128210000	35993000	136020000	32412000	176000000	59014000	26937000	42863000	52006000	36424000	47301000	45778000
P06454	P06454	Prothymosin alpha;Prothymosin alpha, N-terminally processed;Thymosin alpha-1	PTMA	sp|P06454|PTMA_HUMAN Prothymosin alpha OS=Homo sapiens OX=9606 GN=PTMA PE=1 SV=2	By MS/MS	By matching	By MS/MS	By matching	By MS/MS	By MS/MS	By matching	By MS/MS	By matching	By MS/MS	By matching	By MS/MS	By MS/MS	By MS/MS	By MS/MS	By MS/MS	By MS/MS	By MS/MS	1292300000	22542000	11806000	11889000	15431000	8794000	39317000	13975000	41986000	11934000	41061000	15738000	78724000	149210000	219630000	214780000	118560000	162990000	113960000
P62753	P62753	Small ribosomal subunit protein eS6	RPS6	sp|P62753|RS6_HUMAN Small ribosomal subunit protein eS6 OS=Homo sapiens OX=9606 GN=RPS6 PE=1 SV=1	By MS/MS	By MS/MS	By MS/MS	By MS/MS	By MS/MS	By MS/MS	By MS/MS	By MS/MS	By MS/MS	By MS/MS	By MS/MS	By MS/MS	By MS/MS	By MS/MS	By MS/MS	By MS/MS	By MS/MS	By MS/MS	1227100000	84489000	92066000	37689000	73027000	58343000	82223000	139520000	39644000	89166000	35766000	138610000	65467000	35944000	47828000	70208000	34402000	58571000	44162000
Q92688	Q92688	Acidic leucine-rich nuclear phosphoprotein 32 family member B	ANP32B	sp|Q92688|AN32B_HUMAN Acidic leucine-rich nuclear phosphoprotein 32 family member B OS=Homo sapiens OX=9606 GN=ANP32B PE=1 SV=1	By MS/MS	By MS/MS	By MS/MS	By MS/MS	By MS/MS	By MS/MS	By MS/MS	By MS/MS	By MS/MS	By MS/MS	By MS/MS	By MS/MS	By MS/MS	By MS/MS	By MS/MS	By MS/MS	By MS/MS	By MS/MS	1215600000	51189000	72691000	28503000	64705000	43836000	103040000	70444000	46296000	63979000	46526000	109390000	72089000	51888000	70255000	84953000	75599000	59149000	101060000
Q9BQE3;Q71U36;P68363;P68366	Q9BQE3;Q71U36;P68363;P68366	Tubulin alpha-1C chain;Detyrosinated tubulin alpha-1C chain;Tubulin alpha-1A chain;Detyrosinated tubulin alpha-1A chain;Tubulin alpha-1B chain;Detyrosinated tubulin alpha-1B chain;Tubulin alpha-4A chain	TUBA1C;TUBA1A;TUBA1B;TUBA4A	sp|Q9BQE3|TBA1C_HUMAN Tubulin alpha-1C chain OS=Homo sapiens OX=9606 GN=TUBA1C PE=1 SV=1;sp|Q71U36|TBA1A_HUMAN Tubulin alpha-1A chain OS=Homo sapiens OX=9606 GN=TUBA1A PE=1 SV=1;sp|P68363|TBA1B_HUMAN Tubulin alpha-1B chain OS=Homo sapiens OX=9606 GN=TUBA1B	By MS/MS	By MS/MS	By MS/MS	By MS/MS	By MS/MS	By MS/MS	By MS/MS	By MS/MS	By MS/MS	By MS/MS	By MS/MS	By MS/MS	By MS/MS	By MS/MS	By MS/MS	By MS/MS	By MS/MS	By MS/MS	1173900000	156750000	62164000	59577000	42946000	66062000	52955000	58532000	36330000	56659000	44218000	45429000	55074000	21565000	101740000	88458000	38965000	119910000	66585000
P10809	P10809	60 kDa heat shock protein, mitochondrial	HSPD1	sp|P10809|CH60_HUMAN 60 kDa heat shock protein, mitochondrial OS=Homo sapiens OX=9606 GN=HSPD1 PE=1 SV=2	By MS/MS	By MS/MS	By MS/MS	By MS/MS	By MS/MS	By MS/MS	By MS/MS	By MS/MS	By MS/MS	By MS/MS	By MS/MS	By MS/MS	By MS/MS	By MS/MS	By MS/MS	By MS/MS	By MS/MS	By MS/MS	1159300000	106180000	78366000	70322000	36407000	69129000	47869000	87404000	41964000	54640000	47786000	74624000	65927000	39784000	67327000	98021000	46043000	76023000	51499000
P84090	P84090	Enhancer of rudimentary homolog	ERH	sp|P84090|ERH_HUMAN Enhancer of rudimentary homolog OS=Homo sapiens OX=9606 GN=ERH PE=1 SV=1	By MS/MS	By MS/MS	By MS/MS	By MS/MS	By MS/MS	By MS/MS	By MS/MS	By MS/MS	By MS/MS	By MS/MS	By MS/MS	By MS/MS	By MS/MS	By MS/MS	By MS/MS	By MS/MS	By MS/MS	By MS/MS	1107400000	96869000	101870000	47719000	65152000	46361000	70775000	160110000	43599000	80928000	28896000	139490000	37946000	30766000	31635000	47120000	20839000	20471000	36860000
P23284	P23284	Peptidyl-prolyl cis-trans isomerase B	PPIB	sp|P23284|PPIB_HUMAN Peptidyl-prolyl cis-trans isomerase B OS=Homo sapiens OX=9606 GN=PPIB PE=1 SV=2	By MS/MS	By MS/MS	By MS/MS	By MS/MS	By MS/MS	By MS/MS	By MS/MS	By MS/MS	By MS/MS	By MS/MS	By MS/MS	By MS/MS	By MS/MS	By MS/MS	By MS/MS	By MS/MS	By MS/MS	By MS/MS	1089600000	99832000	90131000	88850000	53354000	74922000	39297000	134120000	34974000	110860000	28747000	139270000	33527000	13599000	21159000	46067000	17820000	27452000	35651000
P62847	P62847	Small ribosomal subunit protein eS24	RPS24	sp|P62847|RS24_HUMAN Small ribosomal subunit protein eS24 OS=Homo sapiens OX=9606 GN=RPS24 PE=1 SV=1	By MS/MS	By MS/MS	By MS/MS	By MS/MS	By MS/MS	By MS/MS	By MS/MS	By MS/MS	By MS/MS	By MS/MS	By MS/MS	By MS/MS	By MS/MS	By MS/MS	By MS/MS	By MS/MS	By MS/MS	By MS/MS	1.0503e+09	81141000	76514000	28018000	55517000	41361000	101990000	104100000	31102000	72847000	29232000	171910000	48044000	48890000	26810000	32736000	26658000	35667000	37763000
P18077	P18077	Large ribosomal subunit protein eL33	RPL35A	sp|P18077|RL35A_HUMAN Large ribosomal subunit protein eL33 OS=Homo sapiens OX=9606 GN=RPL35A PE=1 SV=2	By MS/MS	By MS/MS	By MS/MS	By MS/MS	By MS/MS	By MS/MS	By MS/MS	By MS/MS	By MS/MS	By MS/MS	By MS/MS	By MS/MS	By MS/MS	By MS/MS	By MS/MS	By MS/MS	By MS/MS	By MS/MS	1.0382e+09	95492000	91466000	43219000	66454000	52083000	73726000	123560000	40281000	55691000	22005000	133190000	47688000	37816000	34649000	32911000	23124000	24478000	40335000
P68104;Q5VTE0;Q05639	P68104;Q5VTE0;Q05639	Elongation factor 1-alpha 1;Putative elongation factor 1-alpha-like 3;Elongation factor 1-alpha 2	EEF1A1;EEF1A1P5;EEF1A2	sp|P68104|EF1A1_HUMAN Elongation factor 1-alpha 1 OS=Homo sapiens OX=9606 GN=EEF1A1 PE=1 SV=1;sp|Q5VTE0|EF1A3_HUMAN Putative elongation factor 1-alpha-like 3 OS=Homo sapiens OX=9606 GN=EEF1A1P5 PE=5 SV=1;sp|Q05639|EF1A2_HUMAN Elongation factor 1-alpha 2 OS	By MS/MS	By MS/MS	By MS/MS	By MS/MS	By MS/MS	By MS/MS	By MS/MS	By MS/MS	By MS/MS	By MS/MS	By MS/MS	By MS/MS	By MS/MS	By MS/MS	By MS/MS	By MS/MS	By MS/MS	By MS/MS	1.0123e+09	148040000	75990000	74074000	43830000	73244000	47881000	71994000	26785000	56968000	27204000	56013000	37340000	15905000	41485000	64532000	27890000	74142000	48972000
Q07021	Q07021	Complement component 1 Q subcomponent-binding protein, mitochondrial	C1QBP	sp|Q07021|C1QBP_HUMAN Complement component 1 Q subcomponent-binding protein, mitochondrial OS=Homo sapiens OX=9606 GN=C1QBP PE=1 SV=1	By MS/MS	By MS/MS	By MS/MS	By MS/MS	By MS/MS	By MS/MS	By MS/MS	By MS/MS	By MS/MS	By MS/MS	By MS/MS	By MS/MS	By MS/MS	By MS/MS	By MS/MS	By MS/MS	By MS/MS	By MS/MS	999400000	30328000	27440000	8071400	21686000	4438200	28652000	26611000	29448000	32329000	29273000	40183000	51678000	86419000	156930000	157820000	100420000	82657000	85018000
Q02543	Q02543	Large ribosomal subunit protein eL20	RPL18A	sp|Q02543|RL18A_HUMAN Large ribosomal subunit protein eL20 OS=Homo sapiens OX=9606 GN=RPL18A PE=1 SV=2	By MS/MS	By MS/MS	By MS/MS	By MS/MS	By MS/MS	By MS/MS	By MS/MS	By MS/MS	By MS/MS	By MS/MS	By MS/MS	By MS/MS	By MS/MS	By MS/MS	By MS/MS	By MS/MS	By MS/MS	By MS/MS	977740000	58992000	82620000	35212000	78873000	62729000	84862000	115030000	35116000	107970000	37042000	124920000	45094000	20661000	20766000	3779300	20873000	15105000	28096000
P40429;Q6NVV1	P40429;Q6NVV1	Large ribosomal subunit protein uL13;Putative ribosomal protein uL13-like	RPL13A;RPL13AP3	sp|P40429|RL13A_HUMAN Large ribosomal subunit protein uL13 OS=Homo sapiens OX=9606 GN=RPL13A PE=1 SV=2;sp|Q6NVV1|R13P3_HUMAN Putative ribosomal protein uL13-like OS=Homo sapiens OX=9606 GN=RPL13AP3 PE=5 SV=1	By MS/MS	By MS/MS	By MS/MS	By MS/MS	By MS/MS	By MS/MS	By MS/MS	By MS/MS	By MS/MS	By MS/MS	By MS/MS	By MS/MS	By MS/MS	By MS/MS	By MS/MS	By MS/MS	By MS/MS	By MS/MS	967000000	87004000	90197000	39751000	59610000	45640000	65664000	101390000	39609000	72014000	30426000	101910000	40153000	31879000	38777000	21738000	24462000	35849000	40926000
Q02539	Q02539	Histone H1.1	H1-1	sp|Q02539|H11_HUMAN Histone H1.1 OS=Homo sapiens OX=9606 GN=H1-1 PE=1 SV=3	By MS/MS	By MS/MS	By MS/MS	By MS/MS	By MS/MS	By MS/MS	By MS/MS	By MS/MS	By MS/MS	By MS/MS	By MS/MS	By MS/MS	By MS/MS	By MS/MS	By MS/MS	By MS/MS	By MS/MS	By MS/MS	958790000	79066000	83772000	35253000	77814000	36644000	69843000	120980000	44444000	59144000	29392000	119660000	37390000	30682000	22321000	28601000	27774000	23888000	32124000
Q969Q0	Q969Q0	Ribosomal protein eL42-like	RPL36AL	sp|Q969Q0|RL36L_HUMAN Ribosomal protein eL42-like OS=Homo sapiens OX=9606 GN=RPL36AL PE=1 SV=3	By MS/MS	By MS/MS	By MS/MS	By MS/MS	By MS/MS	By MS/MS	By MS/MS	By MS/MS	By matching	By MS/MS	By MS/MS	By MS/MS	By MS/MS	By MS/MS	By MS/MS	By MS/MS	By MS/MS	By MS/MS	948630000	76586000	113360000	39853000	57380000	4569000	79841000	136350000	47906000	3879300	23712000	157780000	55173000	8624600	6003200	32514000	32369000	32596000	40145000
P11021	P11021	Endoplasmic reticulum chaperone BiP	HSPA5	sp|P11021|BIP_HUMAN Endoplasmic reticulum chaperone BiP OS=Homo sapiens OX=9606 GN=HSPA5 PE=1 SV=2	By MS/MS	By MS/MS	By MS/MS	By MS/MS	By MS/MS	By MS/MS	By MS/MS	By MS/MS	By MS/MS	By MS/MS	By MS/MS	By MS/MS	By MS/MS	By MS/MS	By MS/MS	By MS/MS	By MS/MS	By MS/MS	943210000	95948000	58515000	87163000	36229000	72475000	35215000	84169000	37015000	84122000	39315000	48815000	34361000	16817000	34245000	64452000	22708000	52842000	38802000
P35268	P35268	Large ribosomal subunit protein eL22	RPL22	sp|P35268|RL22_HUMAN Large ribosomal subunit protein eL22 OS=Homo sapiens OX=9606 GN=RPL22 PE=1 SV=2	By MS/MS	By MS/MS	By MS/MS	By MS/MS	By MS/MS	By MS/MS	By MS/MS	By MS/MS	By MS/MS	By MS/MS	By MS/MS	By MS/MS	By MS/MS	By MS/MS	By MS/MS	By MS/MS	By MS/MS	By MS/MS	942020000	79053000	58985000	39737000	41771000	47728000	59855000	87285000	41621000	76389000	31867000	74418000	38027000	38946000	50130000	51940000	26035000	48822000	49414000
Q9NVT9	Q9NVT9	Armadillo repeat-containing protein 1	ARMC1	sp|Q9NVT9|ARMC1_HUMAN Armadillo repeat-containing protein 1 OS=Homo sapiens OX=9606 GN=ARMC1 PE=1 SV=1	By MS/MS	By MS/MS	By MS/MS	By MS/MS	By MS/MS	By MS/MS	By MS/MS	By MS/MS	By MS/MS	By MS/MS	By MS/MS	By MS/MS	By MS/MS	By MS/MS	By MS/MS	By MS/MS	By MS/MS	By MS/MS	931010000	95830000	65988000	44970000	38781000	37256000	44120000	99744000	34000000	104820000	35386000	68019000	35020000	19199000	24886000	64136000	20083000	47954000	50822000
P84103	P84103	Serine/arginine-rich splicing factor 3	SRSF3	sp|P84103|SRSF3_HUMAN Serine/arginine-rich splicing factor 3 OS=Homo sapiens OX=9606 GN=SRSF3 PE=1 SV=1	By MS/MS	By MS/MS	By MS/MS	By MS/MS	By MS/MS	By MS/MS	By MS/MS	By MS/MS	By MS/MS	By MS/MS	By MS/MS	By MS/MS	By MS/MS	By MS/MS	By MS/MS	By MS/MS	By MS/MS	By MS/MS	917400000	72281000	63829000	57854000	51623000	40324000	49783000	95257000	29467000	70402000	27331000	128960000	35845000	28058000	41717000	27089000	25814000	29563000	42202000
P60660;P14649	P60660	Myosin light polypeptide 6	MYL6	sp|P60660|MYL6_HUMAN Myosin light polypeptide 6 OS=Homo sapiens OX=9606 GN=MYL6 PE=1 SV=2	By MS/MS	By MS/MS	By MS/MS	By MS/MS	By MS/MS	By MS/MS	By MS/MS	By MS/MS	By MS/MS	By MS/MS	By MS/MS	By MS/MS	By MS/MS	By MS/MS	By MS/MS	By MS/MS	By MS/MS	By MS/MS	915490000	76302000	67106000	36810000	50458000	36311000	43595000	103000000	31570000	58203000	34956000	113340000	47884000	21212000	32326000	43787000	30366000	43145000	45127000
P10412	P10412	Histone H1.4	H1-4	sp|P10412|H14_HUMAN Histone H1.4 OS=Homo sapiens OX=9606 GN=H1-4 PE=1 SV=2	By MS/MS	By MS/MS	By MS/MS	By MS/MS	By MS/MS	By MS/MS	By MS/MS	By MS/MS	By MS/MS	By MS/MS	By MS/MS	By MS/MS	By MS/MS	By MS/MS	By MS/MS	By MS/MS	By matching	By MS/MS	894310000	5324100	75109000	306000000	56936000	22103000	29523000	99746000	36831000	48904000	2059600	7079700	17165000	12939000	15690000	213220000	19770000	0	18279000
Q13268	Q13268	Dehydrogenase/reductase SDR family member 2, mitochondrial	DHRS2	sp|Q13268|DHRS2_HUMAN Dehydrogenase/reductase SDR family member 2, mitochondrial OS=Homo sapiens OX=9606 GN=DHRS2 PE=1 SV=4	By MS/MS	By MS/MS	By MS/MS	By MS/MS	By MS/MS	By MS/MS	By MS/MS	By MS/MS	By MS/MS	By MS/MS	By MS/MS	By MS/MS	By MS/MS	By MS/MS	By MS/MS	By MS/MS	By MS/MS	By MS/MS	894180000	97726000	90581000	39167000	64742000	38121000	40768000	155650000	24212000	61779000	19529000	139450000	24804000	9863400	18156000	19754000	9622900	25859000	14398000
P32969	P32969	Large ribosomal subunit protein uL6	RPL9	sp|P32969|RL9_HUMAN Large ribosomal subunit protein uL6 OS=Homo sapiens OX=9606 GN=RPL9 PE=1 SV=1	By MS/MS	By MS/MS	By MS/MS	By MS/MS	By MS/MS	By MS/MS	By MS/MS	By MS/MS	By MS/MS	By MS/MS	By MS/MS	By MS/MS	By MS/MS	By MS/MS	By MS/MS	By MS/MS	By MS/MS	By MS/MS	868600000	81386000	85714000	38686000	50509000	35292000	43532000	83023000	39066000	71875000	29697000	94106000	28700000	37852000	22919000	37752000	18655000	33761000	36078000
P30050	P30050	Large ribosomal subunit protein uL11	RPL12	sp|P30050|RL12_HUMAN Large ribosomal subunit protein uL11 OS=Homo sapiens OX=9606 GN=RPL12 PE=1 SV=1	By MS/MS	By MS/MS	By MS/MS	By MS/MS	By MS/MS	By MS/MS	By MS/MS	By MS/MS	By MS/MS	By MS/MS	By MS/MS	By MS/MS	By MS/MS	By MS/MS	By MS/MS	By MS/MS	By MS/MS	By MS/MS	860660000	75028000	75903000	35529000	58686000	44845000	58047000	91836000	44394000	78789000	30670000	99574000	22816000	29492000	23083000	34803000	17493000	19757000	19917000
P46778	P46778	Large ribosomal subunit protein eL21	RPL21	sp|P46778|RL21_HUMAN Large ribosomal subunit protein eL21 OS=Homo sapiens OX=9606 GN=RPL21 PE=1 SV=2	By MS/MS	By MS/MS	By MS/MS	By MS/MS	By MS/MS	By MS/MS	By MS/MS	By MS/MS	By MS/MS	By MS/MS	By MS/MS	By MS/MS	By MS/MS	By MS/MS	By MS/MS	By MS/MS	By MS/MS	By MS/MS	853920000	76182000	90647000	34357000	54920000	47915000	80017000	72780000	31174000	54623000	29420000	53183000	26208000	35642000	33257000	40948000	33919000	32920000	25805000
P61604	P61604	10 kDa heat shock protein, mitochondrial	HSPE1	sp|P61604|CH10_HUMAN 10 kDa heat shock protein, mitochondrial OS=Homo sapiens OX=9606 GN=HSPE1 PE=1 SV=2	By MS/MS	By MS/MS	By MS/MS	By MS/MS	By MS/MS	By MS/MS	By MS/MS	By MS/MS	By MS/MS	By MS/MS	By MS/MS	By MS/MS	By MS/MS	By MS/MS	By MS/MS	By MS/MS	By MS/MS	By MS/MS	849860000	78373000	79265000	88017000	28046000	76537000	27723000	78239000	41821000	57073000	41242000	39249000	37208000	10145000	23736000	55465000	13082000	32535000	42109000
O76021	O76021	Ribosomal L1 domain-containing protein 1	RSL1D1	sp|O76021|RL1D1_HUMAN Ribosomal L1 domain-containing protein 1 OS=Homo sapiens OX=9606 GN=RSL1D1 PE=1 SV=3	By MS/MS	By MS/MS	By MS/MS	By MS/MS	By MS/MS	By MS/MS	By MS/MS	By MS/MS	By MS/MS	By MS/MS	By MS/MS	By MS/MS	By MS/MS	By MS/MS	By MS/MS	By MS/MS	By MS/MS	By MS/MS	772850000	57963000	75723000	23819000	54196000	22626000	33360000	133030000	24959000	73462000	19855000	131360000	24903000	18674000	13237000	21518000	14357000	10120000	19697000
P08670;P41219;CON__Q8N1N4-2;CON__Q7RTT2;P14136;P17661;Q8N1N4	P08670	Vimentin	VIM	sp|P08670|VIME_HUMAN Vimentin OS=Homo sapiens OX=9606 GN=VIM PE=1 SV=4	By MS/MS	By MS/MS	By MS/MS	By MS/MS	By MS/MS	By MS/MS	By MS/MS	By MS/MS	By MS/MS	By MS/MS	By MS/MS	By MS/MS	By MS/MS	By MS/MS	By MS/MS	By MS/MS	By MS/MS	By MS/MS	772080000	108810000	69996000	80828000	38397000	49556000	27065000	128600000	35024000	30923000	46635000	46467000	19942000	8058400	15523000	19301000	5634900	23691000	17623000
Q9NPE3	Q9NPE3	H/ACA ribonucleoprotein complex subunit 3	NOP10	sp|Q9NPE3|NOP10_HUMAN H/ACA ribonucleoprotein complex subunit 3 OS=Homo sapiens OX=9606 GN=NOP10 PE=1 SV=1	By MS/MS	By MS/MS	By MS/MS	By MS/MS	By MS/MS	By MS/MS	By MS/MS	By MS/MS	By matching	By MS/MS	By MS/MS	By MS/MS	By MS/MS	By MS/MS	By MS/MS	By MS/MS	By MS/MS	By MS/MS	766980000	53850000	56192000	23650000	43130000	16576000	43737000	66618000	37071000	4674400	36733000	70426000	45058000	31432000	39322000	62825000	47978000	45488000	46891000
P05388;Q8NHW5	P05388;Q8NHW5	Large ribosomal subunit protein uL10;Putative ribosomal protein uL10-like	RPLP0;RPLP0P6	sp|P05388|RLA0_HUMAN Large ribosomal subunit protein uL10 OS=Homo sapiens OX=9606 GN=RPLP0 PE=1 SV=1;sp|Q8NHW5|RLA0L_HUMAN Putative ribosomal protein uL10-like OS=Homo sapiens OX=9606 GN=RPLP0P6 PE=5 SV=1	By MS/MS	By MS/MS	By MS/MS	By MS/MS	By MS/MS	By MS/MS	By MS/MS	By MS/MS	By MS/MS	By MS/MS	By MS/MS	By MS/MS	By MS/MS	By MS/MS	By MS/MS	By MS/MS	By MS/MS	By MS/MS	762790000	89729000	50403000	35450000	38646000	42679000	54440000	59549000	25020000	45520000	30185000	65006000	32811000	22716000	28799000	31541000	19202000	53235000	37855000
P62266	P62266	Small ribosomal subunit protein uS12	RPS23	sp|P62266|RS23_HUMAN Small ribosomal subunit protein uS12 OS=Homo sapiens OX=9606 GN=RPS23 PE=1 SV=3	By MS/MS	By MS/MS	By MS/MS	By MS/MS	By MS/MS	By MS/MS	By MS/MS	By MS/MS	By MS/MS	By MS/MS	By MS/MS	By MS/MS	By MS/MS	By MS/MS	By MS/MS	By MS/MS	By MS/MS	By MS/MS	761160000	54652000	59687000	20043000	47607000	39123000	49543000	121740000	20662000	73103000	18076000	92404000	29168000	15080000	18871000	35574000	18231000	25303000	22293000
P84098	P84098	Large ribosomal subunit protein eL19	RPL19	sp|P84098|RL19_HUMAN Large ribosomal subunit protein eL19 OS=Homo sapiens OX=9606 GN=RPL19 PE=1 SV=1	By MS/MS	By MS/MS	By MS/MS	By MS/MS	By MS/MS	By MS/MS	By MS/MS	By MS/MS	By MS/MS	By MS/MS	By MS/MS	By MS/MS	By MS/MS	By MS/MS	By MS/MS	By MS/MS	By MS/MS	By MS/MS	707090000	62293000	87048000	32326000	41677000	29953000	35085000	99219000	24473000	26179000	17806000	92493000	26100000	15874000	22013000	26138000	18588000	25941000	23880000
P55769	P55769	NHP2-like protein 1;NHP2-like protein 1, N-terminally processed	SNU13	sp|P55769|NH2L1_HUMAN NHP2-like protein 1 OS=Homo sapiens OX=9606 GN=SNU13 PE=1 SV=3	By MS/MS	By MS/MS	By MS/MS	By MS/MS	By MS/MS	By MS/MS	By MS/MS	By MS/MS	By MS/MS	By MS/MS	By MS/MS	By MS/MS	By MS/MS	By MS/MS	By MS/MS	By MS/MS	By MS/MS	By MS/MS	697140000	65475000	64987000	23553000	43071000	19440000	42566000	101520000	22748000	55053000	20699000	87705000	29608000	18053000	17082000	25375000	21345000	15751000	23118000
P04406;O14556	P04406	Glyceraldehyde-3-phosphate dehydrogenase	GAPDH	sp|P04406|G3P_HUMAN Glyceraldehyde-3-phosphate dehydrogenase OS=Homo sapiens OX=9606 GN=GAPDH PE=1 SV=3	By MS/MS	By MS/MS	By MS/MS	By MS/MS	By MS/MS	By MS/MS	By MS/MS	By MS/MS	By MS/MS	By MS/MS	By MS/MS	By MS/MS	By MS/MS	By MS/MS	By MS/MS	By MS/MS	By MS/MS	By MS/MS	692940000	76113000	37218000	66742000	21388000	41736000	24392000	48483000	29049000	37915000	27002000	29136000	33287000	12124000	35240000	54801000	20221000	60932000	37158000
Q59GN2;P62891	Q59GN2;P62891	Putative ribosomal protein eL39-like 5;Large ribosomal subunit protein eL39	RPL39P5;RPL39	sp|Q59GN2|R39L5_HUMAN Putative ribosomal protein eL39-like 5 OS=Homo sapiens OX=9606 GN=RPL39P5 PE=5 SV=2;sp|P62891|RL39_HUMAN Large ribosomal subunit protein eL39 OS=Homo sapiens OX=9606 GN=RPL39 PE=1 SV=2	By MS/MS	By MS/MS	By MS/MS	By MS/MS	By MS/MS	By MS/MS	By MS/MS	By MS/MS	By MS/MS	By MS/MS	By MS/MS	By MS/MS	By MS/MS	By matching	By MS/MS	By MS/MS	By matching	By matching	668310000	85418000	85507000	33225000	51363000	25900000	52610000	78023000	25919000	41844000	21818000	58315000	19796000	15279000	14508000	19604000	20352000	18831000	44619000
P39023;Q92901	P39023	Large ribosomal subunit protein uL3	RPL3	sp|P39023|RL3_HUMAN Large ribosomal subunit protein uL3 OS=Homo sapiens OX=9606 GN=RPL3 PE=1 SV=2	By MS/MS	By MS/MS	By MS/MS	By MS/MS	By MS/MS	By MS/MS	By MS/MS	By MS/MS	By MS/MS	By MS/MS	By MS/MS	By MS/MS	By MS/MS	By MS/MS	By MS/MS	By MS/MS	By MS/MS	By MS/MS	664700000	57240000	63840000	21879000	42704000	27537000	48657000	82273000	24485000	32714000	17347000	79930000	25791000	23514000	22695000	29687000	16244000	23147000	25014000
P18621	P18621	Large ribosomal subunit protein uL22	RPL17	sp|P18621|RL17_HUMAN Large ribosomal subunit protein uL22 OS=Homo sapiens OX=9606 GN=RPL17 PE=1 SV=3	By MS/MS	By MS/MS	By MS/MS	By MS/MS	By MS/MS	By MS/MS	By MS/MS	By MS/MS	By MS/MS	By MS/MS	By MS/MS	By MS/MS	By MS/MS	By MS/MS	By MS/MS	By MS/MS	By MS/MS	By MS/MS	656050000	49625000	46209000	20644000	36917000	34680000	47659000	76288000	23916000	47360000	22374000	50360000	21746000	31027000	28064000	40409000	20948000	28387000	29436000
O75531	O75531	Barrier-to-autointegration factor;Barrier-to-autointegration factor, N-terminally processed	BANF1	sp|O75531|BAF_HUMAN Barrier-to-autointegration factor OS=Homo sapiens OX=9606 GN=BANF1 PE=1 SV=1	By MS/MS	By MS/MS	By MS/MS	By MS/MS	By MS/MS	By MS/MS	By MS/MS	By MS/MS	By MS/MS	By MS/MS	By MS/MS	By MS/MS	By MS/MS	By MS/MS	By MS/MS	By MS/MS	By MS/MS	By MS/MS	639380000	66862000	73733000	21899000	44663000	8036700	32115000	89064000	316870000	76189000	22051000	80331000	16577000	16966000	12934000	41627000	8790100	27539000	249660000
P61247	P61247	Small ribosomal subunit protein eS1	RPS3A	sp|P61247|RS3A_HUMAN Small ribosomal subunit protein eS1 OS=Homo sapiens OX=9606 GN=RPS3A PE=1 SV=2	By MS/MS	By MS/MS	By MS/MS	By MS/MS	By MS/MS	By MS/MS	By MS/MS	By MS/MS	By MS/MS	By MS/MS	By MS/MS	By MS/MS	By MS/MS	By MS/MS	By MS/MS	By MS/MS	By MS/MS	By MS/MS	636710000	41228000	56184000	24649000	38060000	33259000	42634000	76504000	22165000	49810000	22921000	90592000	26124000	20585000	20996000	17234000	14688000	17457000	21627000
Q5SSJ5	Q5SSJ5	Heterochromatin protein 1-binding protein 3	HP1BP3	sp|Q5SSJ5|HP1B3_HUMAN Heterochromatin protein 1-binding protein 3 OS=Homo sapiens OX=9606 GN=HP1BP3 PE=1 SV=1	By MS/MS	By MS/MS	By MS/MS	By MS/MS	By MS/MS	By MS/MS	By MS/MS	By MS/MS	By MS/MS	By MS/MS	By MS/MS	By MS/MS	By MS/MS	By MS/MS	By MS/MS	By MS/MS	By MS/MS	By MS/MS	617110000	53795000	54088000	24193000	37469000	23306000	41524000	90200000	28986000	37349000	19546000	69081000	24411000	21331000	18047000	20799000	15565000	14510000	22912000
P62318	P62318	Small nuclear ribonucleoprotein Sm D3	SNRPD3	sp|P62318|SMD3_HUMAN Small nuclear ribonucleoprotein Sm D3 OS=Homo sapiens OX=9606 GN=SNRPD3 PE=1 SV=1	By MS/MS	By MS/MS	By MS/MS	By MS/MS	By MS/MS	By MS/MS	By MS/MS	By MS/MS	By MS/MS	By MS/MS	By MS/MS	By MS/MS	By MS/MS	By MS/MS	By MS/MS	By MS/MS	By MS/MS	By MS/MS	614790000	47012000	54260000	20110000	51647000	19143000	46428000	57636000	17024000	39465000	14175000	51408000	22414000	21900000	26760000	43652000	28618000	24301000	28838000
P62829	P62829	Large ribosomal subunit protein uL14	RPL23	sp|P62829|RL23_HUMAN Large ribosomal subunit protein uL14 OS=Homo sapiens OX=9606 GN=RPL23 PE=1 SV=1	By MS/MS	By MS/MS	By MS/MS	By MS/MS	By MS/MS	By MS/MS	By MS/MS	By MS/MS	By MS/MS	By MS/MS	By MS/MS	By MS/MS	By MS/MS	By MS/MS	By MS/MS	By MS/MS	By MS/MS	By MS/MS	586050000	48511000	51350000	26016000	38900000	29105000	35254000	72007000	21763000	44395000	14471000	53522000	24811000	13135000	14442000	21956000	16243000	31053000	29112000
P06576	P06576	ATP synthase subunit beta, mitochondrial	ATP5F1B	sp|P06576|ATPB_HUMAN ATP synthase subunit beta, mitochondrial OS=Homo sapiens OX=9606 GN=ATP5F1B PE=1 SV=3	By MS/MS	By MS/MS	By MS/MS	By MS/MS	By MS/MS	By MS/MS	By MS/MS	By MS/MS	By MS/MS	By MS/MS	By MS/MS	By MS/MS	By MS/MS	By MS/MS	By MS/MS	By MS/MS	By MS/MS	By MS/MS	583510000	57572000	36363000	33123000	20564000	39320000	19123000	47277000	17852000	43080000	19769000	30364000	24454000	13329000	34561000	48796000	20885000	44918000	32159000
P09382	P09382	Galectin-1	LGALS1	sp|P09382|LEG1_HUMAN Galectin-1 OS=Homo sapiens OX=9606 GN=LGALS1 PE=1 SV=2	By MS/MS	By MS/MS	By MS/MS	By MS/MS	By MS/MS	By MS/MS	By MS/MS	By MS/MS	By MS/MS	By MS/MS	By MS/MS	By MS/MS	By MS/MS	By MS/MS	By MS/MS	By MS/MS	By MS/MS	By MS/MS	581310000	63363000	62089000	79404000	25599000	47041000	24058000	43537000	15976000	52361000	13454000	53226000	13290000	8612300	15947000	20163000	8482100	14973000	19735000
P30049	P30049	ATP synthase subunit delta, mitochondrial	ATP5F1D	sp|P30049|ATPD_HUMAN ATP synthase subunit delta, mitochondrial OS=Homo sapiens OX=9606 GN=ATP5F1D PE=1 SV=2	By MS/MS	By MS/MS	By MS/MS	By MS/MS	By MS/MS	By MS/MS	By MS/MS	By MS/MS	By MS/MS	By MS/MS	By MS/MS	By MS/MS	By MS/MS	By MS/MS	By MS/MS	By MS/MS	By MS/MS	By MS/MS	569510000	39961000	31351000	18788000	20199000	16461000	32274000	32886000	25851000	18448000	22411000	28240000	39445000	25537000	48346000	53677000	40401000	41365000	33871000
P37108	P37108	Signal recognition particle 14 kDa protein	SRP14	sp|P37108|SRP14_HUMAN Signal recognition particle 14 kDa protein OS=Homo sapiens OX=9606 GN=SRP14 PE=1 SV=2	By MS/MS	By MS/MS	By MS/MS	By MS/MS	By MS/MS	By MS/MS	By MS/MS	By MS/MS	By MS/MS	By MS/MS	By MS/MS	By MS/MS	By MS/MS	By MS/MS	By MS/MS	By MS/MS	By MS/MS	By MS/MS	569010000	49994000	57095000	25624000	37369000	17670000	40433000	64206000	24978000	36610000	5790800	81489000	23726000	7288700	25054000	23564000	6264500	19650000	22206000
P62308;A8MWD9	P62308;A8MWD9	Small nuclear ribonucleoprotein G;Putative small nuclear ribonucleoprotein G-like protein 15	SNRPG;SNRPGP15	sp|P62308|RUXG_HUMAN Small nuclear ribonucleoprotein G OS=Homo sapiens OX=9606 GN=SNRPG PE=1 SV=1;sp|A8MWD9|RUXGL_HUMAN Putative small nuclear ribonucleoprotein G-like protein 15 OS=Homo sapiens OX=9606 GN=SNRPGP15 PE=5 SV=2	By MS/MS	By MS/MS	By MS/MS	By MS/MS	By MS/MS	By MS/MS	By MS/MS	By MS/MS	By MS/MS	By MS/MS	By MS/MS	By matching	By MS/MS	By MS/MS	By MS/MS	By MS/MS	By matching	None	557780000	82434000	68927000	20973000	42005000	35205000	32251000	99428000	14654000	31728000	19848000	0	17643000	14355000	17579000	25179000	18059000	17512000	0
P23396	P23396	Small ribosomal subunit protein uS3	RPS3	sp|P23396|RS3_HUMAN Small ribosomal subunit protein uS3 OS=Homo sapiens OX=9606 GN=RPS3 PE=1 SV=2	By MS/MS	By MS/MS	By MS/MS	By MS/MS	By MS/MS	By MS/MS	By MS/MS	By MS/MS	By MS/MS	By MS/MS	By MS/MS	By MS/MS	By MS/MS	By MS/MS	By MS/MS	By MS/MS	By MS/MS	By MS/MS	548930000	49055000	44277000	25052000	29150000	29771000	37628000	50823000	21054000	43752000	18853000	52035000	20077000	15677000	22095000	27848000	14395000	25331000	22053000
Q13243	Q13243	Serine/arginine-rich splicing factor 5	SRSF5	sp|Q13243|SRSF5_HUMAN Serine/arginine-rich splicing factor 5 OS=Homo sapiens OX=9606 GN=SRSF5 PE=1 SV=1	By MS/MS	By MS/MS	By MS/MS	By MS/MS	By MS/MS	By MS/MS	By MS/MS	By MS/MS	By MS/MS	By MS/MS	By MS/MS	By MS/MS	By MS/MS	By MS/MS	By MS/MS	By MS/MS	By MS/MS	By MS/MS	527140000	37441000	32160000	16148000	15481000	15190000	44558000	44472000	28696000	24309000	21770000	40682000	28326000	25355000	34141000	39967000	29981000	30815000	17650000
Q9NY12	Q9NY12	H/ACA ribonucleoprotein complex subunit 1	GAR1	sp|Q9NY12|GAR1_HUMAN H/ACA ribonucleoprotein complex subunit 1 OS=Homo sapiens OX=9606 GN=GAR1 PE=1 SV=1	By MS/MS	By MS/MS	By MS/MS	By MS/MS	By MS/MS	By MS/MS	By MS/MS	By MS/MS	By MS/MS	By MS/MS	By MS/MS	By MS/MS	By MS/MS	By MS/MS	By MS/MS	By MS/MS	By MS/MS	By MS/MS	508090000	31804000	43119000	14066000	27909000	19150000	32742000	77954000	15904000	42027000	13388000	81329000	21071000	10967000	12933000	18235000	15342000	11553000	18598000
P13164;Q01629;Q01628	P13164;Q01629;Q01628	Interferon-induced transmembrane protein 1;Interferon-induced transmembrane protein 2;Interferon-induced transmembrane protein 3	IFITM1;IFITM2;IFITM3	sp|P13164|IFM1_HUMAN Interferon-induced transmembrane protein 1 OS=Homo sapiens OX=9606 GN=IFITM1 PE=1 SV=3;sp|Q01629|IFM2_HUMAN Interferon-induced transmembrane protein 2 OS=Homo sapiens OX=9606 GN=IFITM2 PE=1 SV=2;sp|Q01628|IFM3_HUMAN Interferon-induced	By MS/MS	By MS/MS	By MS/MS	By MS/MS	By MS/MS	By MS/MS	By MS/MS	By MS/MS	By MS/MS	By MS/MS	By matching	None	None	By matching	By MS/MS	None	By MS/MS	By matching	507050000	71471000	39834000	32798000	40228000	29767000	27278000	64698000	31607000	47207000	28753000	3676100	0	0	1909600	55911000	0	31078000	834570
Q99848	Q99848	Probable rRNA-processing protein EBP2	EBNA1BP2	sp|Q99848|EBP2_HUMAN Probable rRNA-processing protein EBP2 OS=Homo sapiens OX=9606 GN=EBNA1BP2 PE=1 SV=2	By MS/MS	By MS/MS	By MS/MS	By MS/MS	By MS/MS	By MS/MS	By MS/MS	By MS/MS	By MS/MS	By MS/MS	By MS/MS	By MS/MS	By MS/MS	By MS/MS	By MS/MS	By MS/MS	By MS/MS	By MS/MS	504950000	46030000	54817000	23438000	33219000	18173000	24883000	91261000	16282000	41107000	12505000	72649000	14989000	8225500	7922900	10941000	7819900	7985100	12706000
P26583	P26583	High mobility group protein B2	HMGB2	sp|P26583|HMGB2_HUMAN High mobility group protein B2 OS=Homo sapiens OX=9606 GN=HMGB2 PE=1 SV=2	By MS/MS	By MS/MS	By MS/MS	By MS/MS	By MS/MS	By MS/MS	By MS/MS	By MS/MS	By MS/MS	By MS/MS	By MS/MS	By MS/MS	By MS/MS	By MS/MS	By MS/MS	By MS/MS	By MS/MS	By MS/MS	503830000	22975000	23780000	15038000	17329000	4851500	29787000	21596000	19930000	15639000	12222000	37249000	25658000	24310000	61648000	59410000	31399000	43140000	37870000
P63162;P14678	P63162;P14678	Small nuclear ribonucleoprotein-associated protein N;Small nuclear ribonucleoprotein-associated proteins B and B	SNRPN;SNRPB	sp|P63162|RSMN_HUMAN Small nuclear ribonucleoprotein-associated protein N OS=Homo sapiens OX=9606 GN=SNRPN PE=1 SV=1;sp|P14678|RSMB_HUMAN Small nuclear ribonucleoprotein-associated proteins B and B OS=Homo sapiens OX=9606 GN=SNRPB PE=1 SV=2	By MS/MS	By MS/MS	By MS/MS	By MS/MS	By MS/MS	By MS/MS	By MS/MS	By MS/MS	By MS/MS	By MS/MS	By MS/MS	By MS/MS	By MS/MS	By MS/MS	By MS/MS	By MS/MS	By MS/MS	By MS/MS	501670000	44138000	47980000	20120000	22832000	21743000	38333000	44518000	14894000	27303000	13614000	40373000	17427000	18103000	20586000	32256000	21600000	22130000	33719000
P62701;Q8TD47;P22090	P62701;Q8TD47;P22090	Small ribosomal subunit protein eS4, X isoform;Small ribosomal subunit protein eS4, Y isoform 2;Small ribosomal subunit protein eS4, Y isoform 1	RPS4X;RPS4Y2;RPS4Y1	sp|P62701|RS4X_HUMAN Small ribosomal subunit protein eS4, X isoform OS=Homo sapiens OX=9606 GN=RPS4X PE=1 SV=2;sp|Q8TD47|RS4Y2_HUMAN Small ribosomal subunit protein eS4, Y isoform 2 OS=Homo sapiens OX=9606 GN=RPS4Y2 PE=1 SV=3;sp|P22090|RS4Y1_HUMAN Small ri	By MS/MS	By MS/MS	By MS/MS	By MS/MS	By MS/MS	By MS/MS	By MS/MS	By MS/MS	By MS/MS	By MS/MS	By MS/MS	By MS/MS	By MS/MS	By MS/MS	By MS/MS	By MS/MS	By MS/MS	By MS/MS	496830000	37404000	31414000	19754000	17053000	31176000	34357000	49746000	21709000	30599000	15411000	57816000	23699000	12723000	21792000	27530000	16986000	24692000	22971000
P35659	P35659	Protein DEK	DEK	sp|P35659|DEK_HUMAN Protein DEK OS=Homo sapiens OX=9606 GN=DEK PE=1 SV=1	By MS/MS	By MS/MS	By MS/MS	By MS/MS	By MS/MS	By MS/MS	By MS/MS	By MS/MS	By MS/MS	By MS/MS	By MS/MS	By MS/MS	By MS/MS	By MS/MS	By MS/MS	By MS/MS	By MS/MS	By MS/MS	495050000	40782000	46957000	19109000	32659000	17851000	32069000	59954000	18934000	32436000	13706000	76393000	18398000	13777000	12747000	16946000	12301000	12142000	17888000
P19105;O14950;P24844	P19105;O14950;P24844	Myosin regulatory light chain 12A;Myosin regulatory light chain 12B;Myosin regulatory light polypeptide 9	MYL12A;MYL12B;MYL9	sp|P19105|ML12A_HUMAN Myosin regulatory light chain 12A OS=Homo sapiens OX=9606 GN=MYL12A PE=1 SV=2;sp|O14950|ML12B_HUMAN Myosin regulatory light chain 12B OS=Homo sapiens OX=9606 GN=MYL12B PE=1 SV=2;sp|P24844|MYL9_HUMAN Myosin regulatory light polypeptide	By MS/MS	By MS/MS	By MS/MS	By MS/MS	By MS/MS	By MS/MS	By MS/MS	By MS/MS	By MS/MS	By MS/MS	By MS/MS	By MS/MS	By MS/MS	By MS/MS	By MS/MS	By MS/MS	By MS/MS	By MS/MS	483050000	36637000	31393000	30707000	24273000	18725000	20582000	56683000	17751000	31542000	21801000	52861000	24062000	10290000	23201000	32611000	11193000	17428000	21310000
Q9UKD2	Q9UKD2	mRNA turnover protein 4 homolog	MRTO4	sp|Q9UKD2|MRT4_HUMAN mRNA turnover protein 4 homolog OS=Homo sapiens OX=9606 GN=MRTO4 PE=1 SV=2	By MS/MS	By MS/MS	By MS/MS	By MS/MS	By MS/MS	By MS/MS	By MS/MS	By MS/MS	By MS/MS	By MS/MS	By MS/MS	By MS/MS	By MS/MS	By MS/MS	By MS/MS	By MS/MS	By MS/MS	By MS/MS	460880000	38381000	51600000	16034000	22122000	23123000	32993000	70126000	18313000	52788000	12511000	55254000	19368000	9422000	6903500	7855700	7629600	5301800	11157000
P08238;Q58FF7	P08238	Heat shock protein HSP 90-beta	HSP90AB1	sp|P08238|HS90B_HUMAN Heat shock protein HSP 90-beta OS=Homo sapiens OX=9606 GN=HSP90AB1 PE=1 SV=4	By MS/MS	By MS/MS	By MS/MS	By MS/MS	By MS/MS	By MS/MS	By MS/MS	By MS/MS	By MS/MS	By MS/MS	By MS/MS	By MS/MS	By MS/MS	By MS/MS	By MS/MS	By MS/MS	By MS/MS	By MS/MS	452320000	59715000	19570000	41509000	15520000	23517000	14166000	24430000	13898000	18086000	19081000	13502000	22196000	7416400	37094000	37579000	10939000	42130000	31971000
Q9GZP8	Q9GZP8	Immortalization up-regulated protein	IMUP	sp|Q9GZP8|IMUP_HUMAN Immortalization up-regulated protein OS=Homo sapiens OX=9606 GN=IMUP PE=1 SV=1	By MS/MS	By MS/MS	By MS/MS	By MS/MS	By MS/MS	By MS/MS	By MS/MS	By MS/MS	By MS/MS	By MS/MS	By MS/MS	By MS/MS	By MS/MS	By MS/MS	By MS/MS	By MS/MS	By MS/MS	By matching	441990000	10826000	26500000	7646600	24107000	17058000	41257000	45536000	33976000	40829000	21938000	37535000	21218000	21082000	12494000	25432000	21487000	20135000	12935000
P16989	P16989	Y-box-binding protein 3	YBX3	sp|P16989|YBOX3_HUMAN Y-box-binding protein 3 OS=Homo sapiens OX=9606 GN=YBX3 PE=1 SV=4	By MS/MS	By MS/MS	By MS/MS	By MS/MS	By MS/MS	By MS/MS	By MS/MS	By MS/MS	By MS/MS	By MS/MS	By MS/MS	By MS/MS	By MS/MS	By MS/MS	By MS/MS	By MS/MS	By MS/MS	By MS/MS	429370000	39531000	48207000	16083000	22802000	16981000	31557000	41062000	11448000	28581000	9845300	51979000	17448000	13221000	14005000	18242000	17259000	14519000	16601000
P49458	P49458	Signal recognition particle 9 kDa protein	SRP9	sp|P49458|SRP09_HUMAN Signal recognition particle 9 kDa protein OS=Homo sapiens OX=9606 GN=SRP9 PE=1 SV=2	By MS/MS	By MS/MS	By MS/MS	By MS/MS	By MS/MS	By MS/MS	By MS/MS	By MS/MS	By MS/MS	By MS/MS	By MS/MS	By MS/MS	By MS/MS	By MS/MS	By MS/MS	By MS/MS	By MS/MS	By MS/MS	428100000	30288000	42374000	13971000	22001000	9740100	25947000	58421000	15246000	35348000	10318000	56565000	20512000	14143000	16135000	19072000	13855000	12976000	11184000
P22626	P22626	Heterogeneous nuclear ribonucleoproteins A2/B1	HNRNPA2B1	sp|P22626|ROA2_HUMAN Heterogeneous nuclear ribonucleoproteins A2/B1 OS=Homo sapiens OX=9606 GN=HNRNPA2B1 PE=1 SV=2	By MS/MS	By MS/MS	By MS/MS	By MS/MS	By MS/MS	By MS/MS	By MS/MS	By MS/MS	By MS/MS	By MS/MS	By MS/MS	By MS/MS	By MS/MS	By MS/MS	By MS/MS	By MS/MS	By MS/MS	By MS/MS	410590000	55119000	34055000	63905000	17540000	36232000	10786000	51508000	10397000	50151000	14529000	24125000	6827700	2129800	3692700	8365700	2492300	7779100	10953000
P46782	P46782	Small ribosomal subunit protein uS7;Small ribosomal subunit protein uS7, N-terminally processed	RPS5	sp|P46782|RS5_HUMAN Small ribosomal subunit protein uS7 OS=Homo sapiens OX=9606 GN=RPS5 PE=1 SV=4	By MS/MS	By MS/MS	By MS/MS	By MS/MS	By MS/MS	By MS/MS	By MS/MS	By MS/MS	By MS/MS	By MS/MS	By MS/MS	By MS/MS	By MS/MS	By MS/MS	By MS/MS	By MS/MS	By MS/MS	By MS/MS	400070000	29128000	37250000	17100000	25294000	26420000	25849000	51321000	11007000	24970000	14568000	40498000	15109000	12553000	9486600	18876000	6281900	15310000	19045000
P25705	P25705	ATP synthase subunit alpha, mitochondrial	ATP5F1A	sp|P25705|ATPA_HUMAN ATP synthase subunit alpha, mitochondrial OS=Homo sapiens OX=9606 GN=ATP5F1A PE=1 SV=1	By MS/MS	By MS/MS	By MS/MS	By MS/MS	By MS/MS	By MS/MS	By MS/MS	By MS/MS	By MS/MS	By MS/MS	By MS/MS	By MS/MS	By MS/MS	By MS/MS	By MS/MS	By MS/MS	By MS/MS	By MS/MS	391980000	42921000	26806000	32892000	14164000	25230000	11564000	32200000	11573000	29713000	15188000	18543000	15285000	5316900	19891000	27977000	11680000	33212000	17824000
P63173	P63173	Large ribosomal subunit protein eL38	RPL38	sp|P63173|RL38_HUMAN Large ribosomal subunit protein eL38 OS=Homo sapiens OX=9606 GN=RPL38 PE=1 SV=2	By MS/MS	By MS/MS	By MS/MS	By MS/MS	By MS/MS	By MS/MS	By matching	By MS/MS	By MS/MS	By MS/MS	By MS/MS	By MS/MS	By matching	By matching	By MS/MS	By MS/MS	By MS/MS	By matching	390270000	40523000	30442000	33107000	14401000	15764000	16347000	52448000	20080000	26795000	18415000	35492000	19712000	6843600	13803000	10486000	8486200	15591000	11533000
P62280	P62280	Small ribosomal subunit protein uS17	RPS11	sp|P62280|RS11_HUMAN Small ribosomal subunit protein uS17 OS=Homo sapiens OX=9606 GN=RPS11 PE=1 SV=3	By MS/MS	By MS/MS	By MS/MS	By MS/MS	By MS/MS	By MS/MS	By MS/MS	By MS/MS	By MS/MS	By MS/MS	By MS/MS	By MS/MS	By MS/MS	By MS/MS	By MS/MS	By MS/MS	By MS/MS	By MS/MS	377850000	14369000	27255000	15014000	19960000	19790000	34520000	23647000	14736000	20409000	11511000	61798000	19672000	16376000	17923000	19545000	10803000	15292000	15231000
Q15287	Q15287	RNA-binding protein with serine-rich domain 1	RNPS1	sp|Q15287|RNPS1_HUMAN RNA-binding protein with serine-rich domain 1 OS=Homo sapiens OX=9606 GN=RNPS1 PE=1 SV=1	By MS/MS	By MS/MS	By MS/MS	By MS/MS	By MS/MS	By MS/MS	By MS/MS	By MS/MS	By MS/MS	By MS/MS	By MS/MS	By MS/MS	By MS/MS	By MS/MS	By MS/MS	By MS/MS	By MS/MS	By MS/MS	376530000	15408000	27655000	11343000	21083000	10205000	27730000	34328000	12910000	25652000	12535000	40810000	20274000	11906000	13545000	32755000	24201000	16648000	17545000
P21796	P21796	Voltage-dependent anion-selective channel protein 1	VDAC1	sp|P21796|VDAC1_HUMAN Non-selective voltage-gated ion channel VDAC1 OS=Homo sapiens OX=9606 GN=VDAC1 PE=1 SV=2	By MS/MS	By MS/MS	By MS/MS	By MS/MS	By MS/MS	By MS/MS	By MS/MS	By MS/MS	By MS/MS	By MS/MS	By MS/MS	By MS/MS	By MS/MS	By MS/MS	By MS/MS	By MS/MS	By MS/MS	By MS/MS	375950000	39091000	28584000	31252000	14316000	25687000	10453000	34610000	13688000	37238000	17585000	22521000	14516000	6190100	14759000	29460000	6614900	13120000	16270000
Q15084	Q15084	Protein disulfide-isomerase A6	PDIA6	sp|Q15084|PDIA6_HUMAN Protein disulfide-isomerase A6 OS=Homo sapiens OX=9606 GN=PDIA6 PE=1 SV=1	By MS/MS	By MS/MS	By MS/MS	By MS/MS	By MS/MS	By MS/MS	By MS/MS	By MS/MS	By MS/MS	By MS/MS	By MS/MS	By MS/MS	By MS/MS	By MS/MS	By MS/MS	By matching	By MS/MS	By MS/MS	373820000	38402000	26729000	49101000	14493000	32804000	9908800	33036000	12793000	45316000	15059000	17494000	10692000	3556400	8239500	20872000	4684000	13318000	17320000
P27635;Q96L21	P27635;Q96L21	Large ribosomal subunit protein uL16;Ribosomal protein uL16-like	RPL10;RPL10L	sp|P27635|RL10_HUMAN Large ribosomal subunit protein uL16 OS=Homo sapiens OX=9606 GN=RPL10 PE=1 SV=5;sp|Q96L21|RL10L_HUMAN Ribosomal protein uL16-like OS=Homo sapiens OX=9606 GN=RPL10L PE=1 SV=3	By MS/MS	By MS/MS	By MS/MS	By MS/MS	By MS/MS	By MS/MS	By MS/MS	By MS/MS	By MS/MS	By MS/MS	By MS/MS	By MS/MS	By MS/MS	By MS/MS	By MS/MS	By MS/MS	By MS/MS	By MS/MS	372470000	34511000	26850000	15505000	24469000	23094000	22277000	29547000	8127600	26605000	15297000	42120000	13908000	7855100	12614000	21712000	7436600	23197000	17349000
P05141;P12236;P12235;Q9H0C2	P05141;P12236;P12235	ADP/ATP translocase 2;ADP/ATP translocase 2, N-terminally processed;ADP/ATP translocase 3;ADP/ATP translocase 3, N-terminally processed;ADP/ATP translocase 1	SLC25A5;SLC25A6;SLC25A4	sp|P05141|ADT2_HUMAN ADP/ATP translocase 2 OS=Homo sapiens OX=9606 GN=SLC25A5 PE=1 SV=7;sp|P12236|ADT3_HUMAN ADP/ATP translocase 3 OS=Homo sapiens OX=9606 GN=SLC25A6 PE=1 SV=4;sp|P12235|ADT1_HUMAN ADP/ATP translocase 1 OS=Homo sapiens OX=9606 GN=SLC25A4 PE	By MS/MS	By MS/MS	By MS/MS	By MS/MS	By MS/MS	By MS/MS	By MS/MS	By MS/MS	By MS/MS	By MS/MS	By MS/MS	By MS/MS	By MS/MS	By MS/MS	By MS/MS	By MS/MS	By MS/MS	By MS/MS	364900000	51969000	24833000	28548000	12507000	36204000	9980200	36447000	8657000	28397000	12153000	20404000	8605900	3016500	15497000	24365000	5968700	25093000	12253000
Q9Y3Y2	Q9Y3Y2	Chromatin target of PRMT1 protein	CHTOP	sp|Q9Y3Y2|CHTOP_HUMAN Chromatin target of PRMT1 protein OS=Homo sapiens OX=9606 GN=CHTOP PE=1 SV=2	By MS/MS	By MS/MS	By MS/MS	By MS/MS	By MS/MS	By MS/MS	By MS/MS	By MS/MS	By MS/MS	By MS/MS	By MS/MS	By MS/MS	By MS/MS	By MS/MS	By MS/MS	By MS/MS	By MS/MS	By MS/MS	363910000	33346000	46798000	14087000	23581000	13175000	23862000	50510000	11229000	35554000	6535000	55625000	10829000	6998900	6088200	8604100	6424400	2337200	8326300
P62316	P62316	Small nuclear ribonucleoprotein Sm D2	SNRPD2	sp|P62316|SMD2_HUMAN Small nuclear ribonucleoprotein Sm D2 OS=Homo sapiens OX=9606 GN=SNRPD2 PE=1 SV=1	By MS/MS	By MS/MS	By MS/MS	By MS/MS	By MS/MS	By MS/MS	By MS/MS	By MS/MS	By MS/MS	By MS/MS	By MS/MS	By MS/MS	By MS/MS	By MS/MS	By MS/MS	By MS/MS	By MS/MS	By MS/MS	361130000	22144000	38977000	13527000	23631000	12575000	29227000	25319000	13727000	15838000	7449600	25170000	11541000	17141000	19804000	22943000	19750000	20400000	21969000
E9PRG8	E9PRG8	Uncharacterized protein C11orf98	C11orf98	sp|E9PRG8|CK098_HUMAN Uncharacterized protein C11orf98 OS=Homo sapiens OX=9606 GN=C11orf98 PE=1 SV=2	By MS/MS	By MS/MS	By MS/MS	By MS/MS	By MS/MS	By MS/MS	By MS/MS	By MS/MS	By MS/MS	By MS/MS	By MS/MS	By MS/MS	By MS/MS	By MS/MS	By MS/MS	By MS/MS	By MS/MS	By MS/MS	347030000	21891000	35724000	11463000	18449000	11401000	25206000	48536000	13315000	32991000	8339400	51515000	17321000	7109000	7881000	11759000	9285500	6333600	8506200
Q9UMY1	Q9UMY1	U3 small nucleolar RNA-associated protein NOL7	NOL7	sp|Q9UMY1|UTP16_HUMAN U3 small nucleolar RNA-associated protein NOL7 OS=Homo sapiens OX=9606 GN=NOL7 PE=1 SV=2	By MS/MS	By MS/MS	By MS/MS	By MS/MS	By MS/MS	By MS/MS	By MS/MS	By MS/MS	By MS/MS	By MS/MS	By MS/MS	By MS/MS	By MS/MS	By MS/MS	By MS/MS	By MS/MS	By MS/MS	By MS/MS	339920000	29988000	29544000	12833000	27894000	11338000	18792000	43033000	16751000	29692000	13092000	63488000	16210000	7604100	572470	6544900	5948500	490940	6106700
P62937	P62937	Peptidyl-prolyl cis-trans isomerase A;Peptidyl-prolyl cis-trans isomerase A, N-terminally processed	PPIA	sp|P62937|PPIA_HUMAN Peptidyl-prolyl cis-trans isomerase A OS=Homo sapiens OX=9606 GN=PPIA PE=1 SV=2	By MS/MS	By MS/MS	By MS/MS	By MS/MS	By MS/MS	By MS/MS	By MS/MS	By MS/MS	By MS/MS	By MS/MS	By MS/MS	By MS/MS	By matching	By MS/MS	By MS/MS	By MS/MS	By MS/MS	By MS/MS	330660000	37234000	16698000	30717000	11355000	21866000	14419000	23552000	10672000	23785000	7366200	17685000	14798000	4233700	16297000	27091000	7980400	21774000	23133000
P29692	P29692	Elongation factor 1-delta	EEF1D	sp|P29692|EF1D_HUMAN Elongation factor 1-delta OS=Homo sapiens OX=9606 GN=EEF1D PE=1 SV=5	By MS/MS	By MS/MS	By MS/MS	By MS/MS	By MS/MS	By MS/MS	By MS/MS	By MS/MS	By MS/MS	By MS/MS	By MS/MS	By MS/MS	By MS/MS	By MS/MS	By MS/MS	By MS/MS	By MS/MS	By MS/MS	330420000	21812000	5250900	13218000	7775700	8061400	21428000	9848400	13176000	8867500	18229000	9380200	17369000	22625000	34852000	45909000	17440000	28817000	26364000
P22087	P22087	rRNA 2-O-methyltransferase fibrillarin	FBL	sp|P22087|FBRL_HUMAN rRNA 2-O-methyltransferase fibrillarin OS=Homo sapiens OX=9606 GN=FBL PE=1 SV=2	By MS/MS	By MS/MS	By MS/MS	By MS/MS	By MS/MS	By MS/MS	By MS/MS	By MS/MS	By MS/MS	By MS/MS	By MS/MS	By MS/MS	By MS/MS	By MS/MS	By MS/MS	By MS/MS	By MS/MS	By MS/MS	329270000	27682000	34412000	12474000	24852000	11843000	18409000	62981000	12151000	25419000	7714900	51440000	8438200	6175700	4827400	4538100	3550200	4604100	7761400
P14625;Q58FF3	P14625	Endoplasmin	HSP90B1	sp|P14625|ENPL_HUMAN Endoplasmin OS=Homo sapiens OX=9606 GN=HSP90B1 PE=1 SV=1	By MS/MS	By MS/MS	By MS/MS	By MS/MS	By MS/MS	By MS/MS	By MS/MS	By MS/MS	By MS/MS	By MS/MS	By MS/MS	By MS/MS	By MS/MS	By MS/MS	By MS/MS	By MS/MS	By MS/MS	By MS/MS	326090000	37468000	19372000	31155000	11999000	22927000	10866000	25608000	11895000	28497000	14124000	14970000	12527000	4222400	15024000	20446000	8187100	21147000	15656000
P30101	P30101	Protein disulfide-isomerase A3	PDIA3	sp|P30101|PDIA3_HUMAN Protein disulfide-isomerase A3 OS=Homo sapiens OX=9606 GN=PDIA3 PE=1 SV=4	By MS/MS	By MS/MS	By MS/MS	By MS/MS	By MS/MS	By MS/MS	By MS/MS	By MS/MS	By MS/MS	By MS/MS	By MS/MS	By MS/MS	By MS/MS	By MS/MS	By MS/MS	By MS/MS	By MS/MS	By MS/MS	302050000	30185000	19637000	38732000	13615000	33397000	8504400	31911000	11322000	22618000	13806000	15985000	8708000	2079300	7432600	15209000	4260800	10720000	13924000
P69905	P69905	Hemoglobin subunit alpha;Hemopressin	HBA1	sp|P69905|HBA_HUMAN Hemoglobin subunit alpha OS=Homo sapiens OX=9606 GN=HBA1 PE=1 SV=2	By MS/MS	By MS/MS	By MS/MS	By MS/MS	By MS/MS	By MS/MS	By MS/MS	By MS/MS	By MS/MS	By MS/MS	By MS/MS	By MS/MS	By MS/MS	By MS/MS	By MS/MS	By MS/MS	By MS/MS	By MS/MS	292790000	14315000	17430000	5788100	10160000	9269100	18509000	16220000	14329000	14982000	11234000	16115000	17590000	11400000	20339000	34735000	16835000	21791000	21746000
Q16629	Q16629	Serine/arginine-rich splicing factor 7	SRSF7	sp|Q16629|SRSF7_HUMAN Serine/arginine-rich splicing factor 7 OS=Homo sapiens OX=9606 GN=SRSF7 PE=1 SV=1	By MS/MS	By MS/MS	By MS/MS	By MS/MS	By MS/MS	By MS/MS	By MS/MS	By MS/MS	By MS/MS	By MS/MS	By MS/MS	By MS/MS	By MS/MS	By MS/MS	By MS/MS	By MS/MS	By MS/MS	By MS/MS	292240000	14180000	9384300	13579000	12278000	8937600	18682000	26348000	10336000	12018000	12400000	16652000	17792000	16574000	19250000	25057000	13988000	14963000	29824000
P62244	P62244	Small ribosomal subunit protein uS8	RPS15A	sp|P62244|RS15A_HUMAN Small ribosomal subunit protein uS8 OS=Homo sapiens OX=9606 GN=RPS15A PE=1 SV=2	By MS/MS	By MS/MS	By MS/MS	By MS/MS	By MS/MS	By MS/MS	By MS/MS	By MS/MS	By MS/MS	By MS/MS	By MS/MS	By MS/MS	By MS/MS	By MS/MS	By MS/MS	By MS/MS	By MS/MS	By MS/MS	287020000	37318000	15960000	11467000	14102000	26699000	30906000	7956700	10022000	36586000	8172600	9113800	11361000	2292600	2878700	31444000	8697200	12187000	9857600
P61513	P61513	Large ribosomal subunit protein eL43	RPL37A	sp|P61513|RL37A_HUMAN Large ribosomal subunit protein eL43 OS=Homo sapiens OX=9606 GN=RPL37A PE=1 SV=2	By MS/MS	By MS/MS	By MS/MS	By MS/MS	By MS/MS	By MS/MS	By MS/MS	By MS/MS	By MS/MS	By MS/MS	By MS/MS	By MS/MS	By MS/MS	By MS/MS	By MS/MS	By matching	By MS/MS	By MS/MS	282560000	20558000	18298000	13935000	19488000	14764000	24558000	23867000	12944000	18253000	12175000	22200000	14080000	11304000	11702000	12014000	9565900	12402000	10451000
P15880	P15880	Small ribosomal subunit protein uS5	RPS2	sp|P15880|RS2_HUMAN Small ribosomal subunit protein uS5 OS=Homo sapiens OX=9606 GN=RPS2 PE=1 SV=2	By MS/MS	By MS/MS	By MS/MS	By MS/MS	By MS/MS	By MS/MS	By MS/MS	By MS/MS	By MS/MS	By MS/MS	By MS/MS	By MS/MS	By MS/MS	By MS/MS	By MS/MS	By MS/MS	By MS/MS	By MS/MS	280860000	20316000	17533000	9168600	14259000	14368000	23883000	25472000	11925000	21454000	10498000	23572000	14038000	11337000	10929000	15660000	10009000	14746000	11696000
Q32P51;A0A2R8Y4L2;P09651	Q32P51;A0A2R8Y4L2;P09651	Heterogeneous nuclear ribonucleoprotein A1-like 2;Heterogeneous nuclear ribonucleoprotein A1-like 3;Heterogeneous nuclear ribonucleoprotein A1;Heterogeneous nuclear ribonucleoprotein A1, N-terminally processed	HNRNPA1L2;HNRNPA1L3;HNRNPA1	sp|Q32P51|RA1L2_HUMAN Heterogeneous nuclear ribonucleoprotein A1-like 2 OS=Homo sapiens OX=9606 GN=HNRNPA1L2 PE=1 SV=2;sp|A0A2R8Y4L2|RA1L3_HUMAN Heterogeneous nuclear ribonucleoprotein A1-like 3 OS=Homo sapiens OX=9606 GN=HNRNPA1L3 PE=1 SV=2;sp|P09651|ROA1	By MS/MS	By MS/MS	By MS/MS	By MS/MS	By MS/MS	By MS/MS	By MS/MS	By MS/MS	By MS/MS	By MS/MS	By MS/MS	By matching	By matching	By matching	By MS/MS	By matching	By MS/MS	By MS/MS	276720000	34212000	21304000	35683000	13325000	31912000	8307100	34821000	9190900	34621000	10327000	20165000	3676700	1977700	1808700	2948600	2533100	3420800	6487500
P62314	P62314	Small nuclear ribonucleoprotein Sm D1	SNRPD1	sp|P62314|SMD1_HUMAN Small nuclear ribonucleoprotein Sm D1 OS=Homo sapiens OX=9606 GN=SNRPD1 PE=1 SV=1	By MS/MS	By MS/MS	By MS/MS	By MS/MS	By MS/MS	By MS/MS	By MS/MS	By MS/MS	By MS/MS	By MS/MS	By MS/MS	By matching	By MS/MS	By MS/MS	By MS/MS	By MS/MS	By MS/MS	By MS/MS	275240000	31942000	22105000	8580700	20615000	9681200	18101000	25282000	8682700	13202000	6382200	21857000	10786000	11326000	11944000	17734000	12052000	12479000	12483000
P39687;O43423;O95626	P39687;O43423	Acidic leucine-rich nuclear phosphoprotein 32 family member A;Putative uncharacterized protein ANP32CP	ANP32A;ANP32CP	sp|P39687|AN32A_HUMAN Acidic leucine-rich nuclear phosphoprotein 32 family member A OS=Homo sapiens OX=9606 GN=ANP32A PE=1 SV=1;sp|O43423|AN32C_HUMAN Putative uncharacterized protein ANP32CP OS=Homo sapiens OX=9606 GN=ANP32CP PE=5 SV=1	By MS/MS	By MS/MS	By MS/MS	By MS/MS	By MS/MS	By MS/MS	By MS/MS	By MS/MS	By MS/MS	By MS/MS	By MS/MS	By MS/MS	By MS/MS	By MS/MS	By MS/MS	By MS/MS	By MS/MS	By MS/MS	268110000	14848000	12841000	8580000	12032000	8671900	21308000	16056000	10334000	8758500	9942700	17585000	14776000	15273000	22682000	18163000	17311000	18678000	20271000
P04792	P04792	Heat shock protein beta-1	HSPB1	sp|P04792|HSPB1_HUMAN Heat shock protein beta-1 OS=Homo sapiens OX=9606 GN=HSPB1 PE=1 SV=2	By MS/MS	By MS/MS	By MS/MS	By MS/MS	By MS/MS	By MS/MS	By MS/MS	By MS/MS	By MS/MS	By MS/MS	By MS/MS	By MS/MS	By MS/MS	By MS/MS	By MS/MS	By MS/MS	By MS/MS	By MS/MS	266560000	33732000	15855000	20209000	13925000	14917000	11392000	17362000	8680700	17523000	7232300	11432000	9583100	5721600	14179000	18160000	10632000	20220000	15803000
P45880	P45880	Voltage-dependent anion-selective channel protein 2	VDAC2	sp|P45880|VDAC2_HUMAN Voltage-dependent anion-selective channel protein 2 OS=Homo sapiens OX=9606 GN=VDAC2 PE=1 SV=2	By MS/MS	By MS/MS	By MS/MS	By MS/MS	By MS/MS	By MS/MS	By MS/MS	By MS/MS	By MS/MS	By MS/MS	By MS/MS	By MS/MS	By MS/MS	By MS/MS	By MS/MS	By MS/MS	By MS/MS	By MS/MS	261020000	28406000	17347000	22088000	7841800	21700000	8288900	21723000	10360000	25235000	10641000	16016000	9261700	4176900	11441000	16453000	5572800	14061000	10408000
P60866	P60866	Small ribosomal subunit protein uS10	RPS20	sp|P60866|RS20_HUMAN Small ribosomal subunit protein uS10 OS=Homo sapiens OX=9606 GN=RPS20 PE=1 SV=1	By MS/MS	By MS/MS	By MS/MS	By MS/MS	By MS/MS	By MS/MS	By MS/MS	By MS/MS	By MS/MS	By MS/MS	By MS/MS	By MS/MS	By MS/MS	By MS/MS	By MS/MS	By MS/MS	By MS/MS	By MS/MS	259570000	13076000	24528000	11020000	8140000	13367000	22319000	29222000	12122000	6774200	8972500	29106000	10759000	8046300	13311000	12933000	11232000	10099000	14547000
P23528;Q9Y281	P23528	Cofilin-1	CFL1	sp|P23528|COF1_HUMAN Cofilin-1 OS=Homo sapiens OX=9606 GN=CFL1 PE=1 SV=3	By MS/MS	By matching	By MS/MS	By MS/MS	By MS/MS	By MS/MS	By MS/MS	By MS/MS	By MS/MS	By MS/MS	By MS/MS	By MS/MS	By MS/MS	By MS/MS	By MS/MS	By MS/MS	By MS/MS	By MS/MS	255150000	35573000	6366300	24535000	11677000	6260100	6242100	22062000	9095100	19542000	7580000	8290000	11876000	6309400	8113500	23610000	8779800	21125000	18111000
P51665	P51665	26S proteasome non-ATPase regulatory subunit 7	PSMD7	sp|P51665|PSMD7_HUMAN 26S proteasome non-ATPase regulatory subunit 7 OS=Homo sapiens OX=9606 GN=PSMD7 PE=1 SV=2	By MS/MS	By MS/MS	By MS/MS	By MS/MS	By MS/MS	By MS/MS	By MS/MS	By MS/MS	By MS/MS	By MS/MS	By MS/MS	By MS/MS	By MS/MS	By MS/MS	By MS/MS	By MS/MS	By MS/MS	By MS/MS	252880000	19818000	16036000	5608200	8913300	8011000	14500000	16375000	11283000	13050000	9836800	23027000	11679000	11508000	14649000	21194000	16285000	17186000	13919000
P08758	P08758	Annexin A5	ANXA5	sp|P08758|ANXA5_HUMAN Annexin A5 OS=Homo sapiens OX=9606 GN=ANXA5 PE=1 SV=2	By MS/MS	By MS/MS	By MS/MS	By MS/MS	By MS/MS	By MS/MS	By MS/MS	By MS/MS	By MS/MS	By MS/MS	By MS/MS	By MS/MS	By matching	By MS/MS	By MS/MS	By MS/MS	By MS/MS	By MS/MS	249300000	17728000	8715500	17784000	4723900	30868000	7343800	21799000	8841700	23110000	16881000	12854000	8364200	2607300	7634400	22944000	4115800	16952000	16035000
Q9HA90	Q9HA90	EF-hand and coiled-coil domain-containing protein 1	EFCC1	sp|Q9HA90|EFCC1_HUMAN EF-hand and coiled-coil domain-containing protein 1 OS=Homo sapiens OX=9606 GN=EFCC1 PE=1 SV=2	By MS/MS	By MS/MS	By MS/MS	By MS/MS	By MS/MS	By MS/MS	By MS/MS	By MS/MS	By MS/MS	By MS/MS	By MS/MS	By MS/MS	By MS/MS	By MS/MS	By MS/MS	By MS/MS	By MS/MS	By MS/MS	248950000	20004000	23496000	5829800	9514400	10278000	12572000	21429000	10997000	15344000	7996600	24727000	13394000	5720300	8053500	20310000	9942700	13383000	15962000
Q9UKM9	Q9UKM9	RNA-binding protein Raly	RALY	sp|Q9UKM9|RALY_HUMAN RNA-binding protein Raly OS=Homo sapiens OX=9606 GN=RALY PE=1 SV=1	By MS/MS	By MS/MS	By MS/MS	By MS/MS	By MS/MS	By MS/MS	By MS/MS	By MS/MS	By MS/MS	By MS/MS	By MS/MS	By MS/MS	By MS/MS	By MS/MS	By MS/MS	By MS/MS	By MS/MS	By MS/MS	247010000	26971000	28853000	14531000	14472000	10566000	11315000	31003000	5861900	17368000	5335500	24022000	8370200	6105200	9833500	10922000	5942000	7026100	8514100
P11142;P54652	P11142	Heat shock cognate 71 kDa protein	HSPA8	sp|P11142|HSP7C_HUMAN Heat shock cognate 71 kDa protein OS=Homo sapiens OX=9606 GN=HSPA8 PE=1 SV=1	By MS/MS	By MS/MS	By MS/MS	By MS/MS	By MS/MS	By MS/MS	By MS/MS	By MS/MS	By MS/MS	By MS/MS	By MS/MS	By MS/MS	By MS/MS	By MS/MS	By MS/MS	By MS/MS	By MS/MS	By MS/MS	243120000	26223000	17883000	26007000	12344000	17342000	10464000	26651000	7317900	20305000	7840100	16332000	6435300	3571600	6567100	11402000	3045000	13031000	10364000
P0DP25;P0DP24;P0DP23	P0DP25;P0DP24;P0DP23	Calmodulin-3;Calmodulin-2;Calmodulin-1	CALM3;CALM2;CALM1	sp|P0DP25|CALM3_HUMAN Calmodulin-3 OS=Homo sapiens OX=9606 GN=CALM3 PE=1 SV=1;sp|P0DP24|CALM2_HUMAN Calmodulin-2 OS=Homo sapiens OX=9606 GN=CALM2 PE=1 SV=1;sp|P0DP23|CALM1_HUMAN Calmodulin-1 OS=Homo sapiens OX=9606 GN=CALM1 PE=1 SV=1	By MS/MS	By MS/MS	By MS/MS	By MS/MS	By MS/MS	By matching	By MS/MS	By MS/MS	By MS/MS	By MS/MS	By MS/MS	By MS/MS	By MS/MS	By MS/MS	By MS/MS	By MS/MS	By matching	By MS/MS	240080000	21552000	16144000	32400000	11748000	18391000	6559800	15507000	9544800	19144000	9582900	16677000	8703400	3512800	7957200	15624000	6891800	8927900	11213000
P62826	P62826	GTP-binding nuclear protein Ran	RAN	sp|P62826|RAN_HUMAN GTP-binding nuclear protein Ran OS=Homo sapiens OX=9606 GN=RAN PE=1 SV=3	By MS/MS	By MS/MS	By MS/MS	By MS/MS	By MS/MS	By MS/MS	By MS/MS	By MS/MS	By MS/MS	By MS/MS	By MS/MS	By MS/MS	By MS/MS	By MS/MS	By MS/MS	By MS/MS	By MS/MS	By MS/MS	239660000	15435000	23096000	11545000	15777000	11328000	10197000	24316000	8435400	10587000	8639300	26773000	13186000	3409000	11536000	16138000	7438400	16317000	5508600
O14578	O14578	Citron Rho-interacting kinase	CIT	sp|O14578|CTRO_HUMAN Citron Rho-interacting kinase OS=Homo sapiens OX=9606 GN=CIT PE=1 SV=2	By MS/MS	By MS/MS	By MS/MS	None	By matching	By MS/MS	By MS/MS	By MS/MS	By MS/MS	None	By MS/MS	None	By MS/MS	None	By MS/MS	By MS/MS	By MS/MS	None	234380000	23115000	21039000	12008000	0	41648	17512000	22475000	14689000	21105000	0	25727000	0	16320000	0	19017000	20206000	21128000	0
P02545	P02545	Prelamin-A/C;Lamin-A/C	LMNA	sp|P02545|LMNA_HUMAN Prelamin-A/C OS=Homo sapiens OX=9606 GN=LMNA PE=1 SV=1	By MS/MS	By MS/MS	By MS/MS	By MS/MS	By MS/MS	By MS/MS	By MS/MS	By MS/MS	By MS/MS	By MS/MS	By MS/MS	By MS/MS	By MS/MS	By MS/MS	By MS/MS	By MS/MS	By MS/MS	By MS/MS	232370000	27639000	20662000	25428000	12910000	14072000	9927300	26731000	9197000	15568000	9071600	15543000	6581000	4672100	6355200	9723400	3789500	6290600	8204500
P36957	P36957	Dihydrolipoyllysine-residue succinyltransferase component of 2-oxoglutarate dehydrogenase complex, mitochondrial	DLST	sp|P36957|ODO2_HUMAN Dihydrolipoyllysine-residue succinyltransferase component of 2-oxoglutarate dehydrogenase complex, mitochondrial OS=Homo sapiens OX=9606 GN=DLST PE=1 SV=4	By MS/MS	By MS/MS	By MS/MS	By MS/MS	By MS/MS	By MS/MS	By MS/MS	By MS/MS	By MS/MS	By MS/MS	By MS/MS	By MS/MS	By MS/MS	By MS/MS	By MS/MS	By MS/MS	By MS/MS	By MS/MS	231010000	10664000	9605900	6160500	5957900	5643600	11333000	9324000	9722500	9992800	8022900	14115000	17351000	10762000	22150000	29846000	16435000	17516000	16412000
Q13428	Q13428	Treacle protein	TCOF1	sp|Q13428|TCOF_HUMAN Treacle protein OS=Homo sapiens OX=9606 GN=TCOF1 PE=1 SV=3	By MS/MS	By MS/MS	By MS/MS	By MS/MS	By MS/MS	By MS/MS	By MS/MS	By MS/MS	By MS/MS	By MS/MS	By MS/MS	By MS/MS	By MS/MS	By MS/MS	By MS/MS	By MS/MS	By MS/MS	By MS/MS	227800000	16469000	22450000	6764100	14032000	6617200	14229000	31349000	8931900	15445000	6574200	36017000	10286000	6766000	5781500	6647500	6337400	5095900	8006600
Q8NHZ8	Q8NHZ8	Anaphase-promoting complex subunit CDC26	CDC26	sp|Q8NHZ8|CDC26_HUMAN Anaphase-promoting complex subunit CDC26 OS=Homo sapiens OX=9606 GN=CDC26 PE=1 SV=1	None	By MS/MS	By matching	By MS/MS	None	By MS/MS	None	By matching	By matching	By MS/MS	By MS/MS	By MS/MS	By MS/MS	By MS/MS	By MS/MS	By MS/MS	By matching	By MS/MS	224510000	0	13003000	4275000	8780300	0	15258000	0	9367800	16112000	10321000	17105000	17723000	17300000	18609000	25492000	19832000	14423000	16910000
A6NHQ2	A6NHQ2	rRNA/tRNA 2-O-methyltransferase fibrillarin-like protein 1	FBLL1	sp|A6NHQ2|FBLL1_HUMAN rRNA/tRNA 2-O-methyltransferase fibrillarin-like protein 1 OS=Homo sapiens OX=9606 GN=FBLL1 PE=1 SV=2	By MS/MS	By MS/MS	By MS/MS	By MS/MS	By MS/MS	By MS/MS	By MS/MS	By MS/MS	By MS/MS	By MS/MS	By MS/MS	By MS/MS	By MS/MS	By MS/MS	By MS/MS	By MS/MS	By MS/MS	By MS/MS	219540000	19594000	20573000	7322900	11750000	7425900	12753000	32489000	5994400	27947000	5194200	36956000	7389700	4177800	2992100	4387400	3089300	3388000	6112100
P07237	P07237	Protein disulfide-isomerase	P4HB	sp|P07237|PDIA1_HUMAN Protein disulfide-isomerase OS=Homo sapiens OX=9606 GN=P4HB PE=1 SV=3	By MS/MS	By MS/MS	By MS/MS	By MS/MS	By MS/MS	By MS/MS	By MS/MS	By MS/MS	By MS/MS	By MS/MS	By MS/MS	By MS/MS	By MS/MS	By MS/MS	By MS/MS	By MS/MS	By MS/MS	By MS/MS	218700000	27686000	14952000	25220000	7751100	17096000	6029600	20318000	9636500	16321000	9682400	10053000	7689300	1811600	8064500	10741000	4695300	10766000	10191000
P63313	P63313	Thymosin beta-10	TMSB10	sp|P63313|TYB10_HUMAN Thymosin beta-10 OS=Homo sapiens OX=9606 GN=TMSB10 PE=1 SV=2	By matching	By MS/MS	By MS/MS	By MS/MS	By MS/MS	By MS/MS	By MS/MS	By MS/MS	By MS/MS	By MS/MS	By matching	By MS/MS	By matching	By matching	By MS/MS	By MS/MS	By matching	By MS/MS	218090000	13455000	14892000	23902000	10679000	13199000	8321000	20930000	9214100	13302000	7260800	12644000	7923200	4611100	8915400	14320000	5482400	9149700	19888000
P50454	P50454	Serpin H1	SERPINH1	sp|P50454|SERPH_HUMAN Serpin H1 OS=Homo sapiens OX=9606 GN=SERPINH1 PE=1 SV=2	By MS/MS	By MS/MS	By MS/MS	By MS/MS	By MS/MS	By MS/MS	By MS/MS	By MS/MS	By MS/MS	By MS/MS	By MS/MS	By MS/MS	By MS/MS	By MS/MS	By MS/MS	By MS/MS	By MS/MS	By MS/MS	215060000	22845000	14571000	23198000	7646300	14986000	8484300	18821000	6819800	16414000	9729700	11696000	8191900	3295400	12330000	12050000	4604300	9649200	9724300
Q9Y3C1	Q9Y3C1	Nucleolar protein 16	NOP16	sp|Q9Y3C1|NOP16_HUMAN Nucleolar protein 16 OS=Homo sapiens OX=9606 GN=NOP16 PE=1 SV=2	By MS/MS	By MS/MS	By MS/MS	By MS/MS	By MS/MS	By MS/MS	By MS/MS	By MS/MS	By MS/MS	By MS/MS	By MS/MS	By MS/MS	By MS/MS	By MS/MS	By MS/MS	By MS/MS	By matching	By MS/MS	210490000	17634000	23235000	7314900	15323000	7607800	12250000	31704000	8636200	19284000	4319800	35401000	9231100	4266400	1017600	3478800	2344400	2537600	4901100
Q07955	Q07955	Serine/arginine-rich splicing factor 1	SRSF1	sp|Q07955|SRSF1_HUMAN Serine/arginine-rich splicing factor 1 OS=Homo sapiens OX=9606 GN=SRSF1 PE=1 SV=2	By MS/MS	By MS/MS	By MS/MS	By MS/MS	By MS/MS	By MS/MS	By MS/MS	By MS/MS	By MS/MS	By MS/MS	By MS/MS	By MS/MS	By MS/MS	By MS/MS	By MS/MS	By MS/MS	By MS/MS	By MS/MS	202780000	13030000	9897600	13271000	8390800	6651700	8420600	6793200	7484100	10742000	8415500	15467000	10056000	10768000	16533000	18915000	11837000	13861000	12252000
Q9Y2E6	Q9Y2E6	E3 ubiquitin-protein ligase DTX4	DTX4	sp|Q9Y2E6|DTX4_HUMAN E3 ubiquitin-protein ligase DTX4 OS=Homo sapiens OX=9606 GN=DTX4 PE=1 SV=2	By MS/MS	By MS/MS	By MS/MS	By MS/MS	By MS/MS	By MS/MS	By MS/MS	By MS/MS	By MS/MS	By MS/MS	By MS/MS	By MS/MS	By MS/MS	By MS/MS	By MS/MS	By MS/MS	By MS/MS	By MS/MS	199720000	19805000	14721000	11861000	11959000	8295400	9636100	15794000	9206900	13304000	9231300	13418000	8537400	5747100	7383800	10216000	7629000	10912000	12061000
P08962	P08962	CD63 antigen	CD63	sp|P08962|CD63_HUMAN CD63 antigen OS=Homo sapiens OX=9606 GN=CD63 PE=1 SV=2	By MS/MS	By MS/MS	By MS/MS	By MS/MS	By MS/MS	By MS/MS	By MS/MS	By MS/MS	By MS/MS	By MS/MS	By MS/MS	By MS/MS	By MS/MS	By MS/MS	By MS/MS	By MS/MS	By MS/MS	By MS/MS	195150000	25129000	15281000	9088100	8879600	8763300	7200500	21509000	6910600	12673000	6604700	19047000	7333400	1825100	7786900	14649000	3289100	8250200	10933000
P63220	P63220	Small ribosomal subunit protein eS21	RPS21	sp|P63220|RS21_HUMAN Small ribosomal subunit protein eS21 OS=Homo sapiens OX=9606 GN=RPS21 PE=1 SV=1	By MS/MS	By MS/MS	By MS/MS	By MS/MS	By MS/MS	By MS/MS	By MS/MS	By MS/MS	By MS/MS	By MS/MS	By MS/MS	By MS/MS	By MS/MS	By MS/MS	By MS/MS	By MS/MS	By MS/MS	By MS/MS	194960000	9243200	13203000	6567200	12279000	14868000	16174000	22241000	6558500	11302000	7071400	20396000	10252000	7101100	7271700	9499400	5686900	5947000	9299400
P05783;CON__H-INV:HIT000015463;CON__Q92764;Q92764;CON__Q497I4;CON__O76014;CON__O76013;CON__O76015;CON__A2AB72;CON__Q14525;CON__REFSEQ:XP_986630;CON__Q15323;CON__Q14532;CON__A2A5Y0;CON__Q9UE12;O76014;Q15323;O76015;O76013;Q14525;Q14532	P05783	Keratin, type I cytoskeletal 18	KRT18	sp|P05783|K1C18_HUMAN Keratin, type I cytoskeletal 18 OS=Homo sapiens OX=9606 GN=KRT18 PE=1 SV=2	By MS/MS	By MS/MS	By MS/MS	By MS/MS	By MS/MS	By MS/MS	By MS/MS	By MS/MS	By MS/MS	By MS/MS	By MS/MS	By MS/MS	By MS/MS	By MS/MS	By MS/MS	By MS/MS	By MS/MS	By MS/MS	188090000	26904000	12373000	14783000	8377500	6112500	8026000	14074000	7014600	4590600	7598400	11723000	5238400	3151500	10383000	10670000	5580800	18916000	12574000
Q06830;P32119	Q06830	Peroxiredoxin-1	PRDX1	sp|Q06830|PRDX1_HUMAN Peroxiredoxin-1 OS=Homo sapiens OX=9606 GN=PRDX1 PE=1 SV=1	By MS/MS	By MS/MS	By MS/MS	By MS/MS	By MS/MS	By MS/MS	By matching	By MS/MS	By MS/MS	By matching	By MS/MS	By MS/MS	By MS/MS	By MS/MS	By MS/MS	By MS/MS	By MS/MS	By MS/MS	186580000	21477000	14973000	19809000	9480300	12003000	8692700	13040000	4235300	11176000	2888600	8825400	7205700	3312200	6869700	14152000	4810300	12941000	10690000
P38646	P38646	Stress-70 protein, mitochondrial	HSPA9	sp|P38646|GRP75_HUMAN Stress-70 protein, mitochondrial OS=Homo sapiens OX=9606 GN=HSPA9 PE=1 SV=2	By MS/MS	By MS/MS	By MS/MS	By MS/MS	By MS/MS	By MS/MS	By MS/MS	By MS/MS	By MS/MS	By MS/MS	By MS/MS	By MS/MS	By MS/MS	By MS/MS	By MS/MS	By MS/MS	By MS/MS	By MS/MS	186280000	24261000	12946000	16857000	8496300	12856000	6791300	15940000	5167500	12566000	5347700	12833000	3775700	1858800	9207200	11710000	3777900	16036000	5849800
Q9UBI6	Q9UBI6	Guanine nucleotide-binding protein G(I)/G(S)/G(O) subunit gamma-12	GNG12	sp|Q9UBI6|GBG12_HUMAN Guanine nucleotide-binding protein G(I)/G(S)/G(O) subunit gamma-12 OS=Homo sapiens OX=9606 GN=GNG12 PE=1 SV=3	By MS/MS	By MS/MS	By MS/MS	By matching	By matching	By matching	By MS/MS	By matching	By MS/MS	By MS/MS	By MS/MS	By matching	By matching	By matching	By MS/MS	By matching	By matching	By matching	176230000	13514000	13155000	10604000	7867100	6718100	6597500	20335000	6101000	12810000	8690000	8802100	10581000	3867200	8564000	13320000	6135200	7624400	10946000
Q9GZT3	Q9GZT3	SRA stem-loop-interacting RNA-binding protein, mitochondrial	SLIRP	sp|Q9GZT3|SLIRP_HUMAN SRA stem-loop-interacting RNA-binding protein, mitochondrial OS=Homo sapiens OX=9606 GN=SLIRP PE=1 SV=1	By MS/MS	By MS/MS	By MS/MS	By MS/MS	By MS/MS	By MS/MS	By MS/MS	By MS/MS	By MS/MS	By MS/MS	By MS/MS	By MS/MS	By MS/MS	By MS/MS	By MS/MS	By MS/MS	By MS/MS	By matching	175410000	10947000	9902900	2500400	7264300	3147100	13894000	12900000	5407600	12403000	5898000	8860900	9081900	8581600	10953000	16563000	11499000	12674000	12930000
P61978	P61978	Heterogeneous nuclear ribonucleoprotein K	HNRNPK	sp|P61978|HNRPK_HUMAN Heterogeneous nuclear ribonucleoprotein K OS=Homo sapiens OX=9606 GN=HNRNPK PE=1 SV=1	By MS/MS	By MS/MS	By MS/MS	By MS/MS	By MS/MS	By MS/MS	By MS/MS	By MS/MS	By MS/MS	By MS/MS	By MS/MS	By MS/MS	By matching	By matching	By matching	By matching	By MS/MS	By MS/MS	168380000	22104000	13540000	27005000	8685300	15569000	5786200	13932000	5001900	15792000	5069100	7943700	3436200	1768300	2814400	5037800	2829300	6335400	5726000
P25398	P25398	Small ribosomal subunit protein eS12	RPS12	sp|P25398|RS12_HUMAN Small ribosomal subunit protein eS12 OS=Homo sapiens OX=9606 GN=RPS12 PE=1 SV=3	By MS/MS	By MS/MS	By MS/MS	By MS/MS	By MS/MS	By MS/MS	By MS/MS	By MS/MS	By MS/MS	By MS/MS	By MS/MS	By MS/MS	By MS/MS	By MS/MS	By MS/MS	By MS/MS	By MS/MS	By MS/MS	167190000	15470000	17255000	7524500	9649500	7470000	11868000	20967000	9984200	7180900	4984300	15601000	6153800	5524400	4811600	6567100	4350600	5469900	6360800
Q52M93	Q52M93	Zinc finger protein 585B	ZNF585B	sp|Q52M93|Z585B_HUMAN Zinc finger protein 585B OS=Homo sapiens OX=9606 GN=ZNF585B PE=1 SV=1	By MS/MS	By MS/MS	By MS/MS	By MS/MS	By MS/MS	By MS/MS	By matching	By MS/MS	By MS/MS	By matching	By MS/MS	By matching	By matching	By MS/MS	By MS/MS	By matching	By MS/MS	By MS/MS	163020000	21209000	1506800	1840100	22625000	4045600	1404300	2233800	3670800	18998000	624070	5002000	372100	702400	45419000	1199000	457780	15120000	16589000
Q14978	Q14978	Nucleolar and coiled-body phosphoprotein 1	NOLC1	sp|Q14978|NOLC1_HUMAN Nucleolar and coiled-body phosphoprotein 1 OS=Homo sapiens OX=9606 GN=NOLC1 PE=1 SV=2	By MS/MS	By MS/MS	By MS/MS	By MS/MS	By MS/MS	By MS/MS	By MS/MS	By MS/MS	By MS/MS	By MS/MS	By MS/MS	By MS/MS	By MS/MS	By MS/MS	By MS/MS	By MS/MS	By MS/MS	By MS/MS	162370000	13777000	15093000	5630300	8767300	7977100	10968000	14016000	6248300	8245400	5066800	18368000	7619200	5115200	3838900	7377100	9438500	6490700	8329500
P32322	P32322	Pyrroline-5-carboxylate reductase 1, mitochondrial	PYCR1	sp|P32322|P5CR1_HUMAN Pyrroline-5-carboxylate reductase 1, mitochondrial OS=Homo sapiens OX=9606 GN=PYCR1 PE=1 SV=2	By MS/MS	By MS/MS	By MS/MS	By MS/MS	By MS/MS	By MS/MS	By MS/MS	By MS/MS	By MS/MS	By MS/MS	By MS/MS	By MS/MS	By MS/MS	By MS/MS	By MS/MS	By MS/MS	By MS/MS	By MS/MS	158720000	8166000	9082100	8086600	2566800	8146900	9984900	12120000	5750700	10083000	3561500	10977000	10764000	5730000	10883000	13654000	10130000	11189000	7848100
P07814	P07814	Bifunctional glutamate/proline--tRNA ligase;Glutamate--tRNA ligase;Proline--tRNA ligase	EPRS1	sp|P07814|SYEP_HUMAN Bifunctional glutamate/proline--tRNA ligase OS=Homo sapiens OX=9606 GN=EPRS1 PE=1 SV=5	By MS/MS	By MS/MS	By MS/MS	By MS/MS	By MS/MS	By MS/MS	By MS/MS	By MS/MS	By MS/MS	By MS/MS	By MS/MS	By MS/MS	By MS/MS	By MS/MS	By MS/MS	By MS/MS	By MS/MS	By MS/MS	156810000	11169000	9823100	4726000	8067500	6737900	10168000	13822000	6636900	9712100	6340600	14331000	9993600	4790900	7633200	7824200	8764800	7623600	8647600
Q5HYM0	Q5HYM0	Probable ribonuclease ZC3H12B	ZC3H12B	sp|Q5HYM0|ZC12B_HUMAN Probable ribonuclease ZC3H12B OS=Homo sapiens OX=9606 GN=ZC3H12B PE=1 SV=3	By MS/MS	By MS/MS	By MS/MS	By MS/MS	None	By MS/MS	By MS/MS	By MS/MS	By MS/MS	By MS/MS	By MS/MS	By MS/MS	By MS/MS	By MS/MS	By MS/MS	By MS/MS	None	By MS/MS	156460000	17313000	15383000	6440100	8316800	0	9801500	11321000	3144000	18958000	3517800	20427000	6062700	4256100	4196400	8173500	10221000	0	8924400
P60468	P60468	Protein transport protein Sec61 subunit beta	SEC61B	sp|P60468|SC61B_HUMAN Protein transport protein Sec61 subunit beta OS=Homo sapiens OX=9606 GN=SEC61B PE=1 SV=2	By MS/MS	By MS/MS	By MS/MS	By MS/MS	By MS/MS	By MS/MS	By MS/MS	By MS/MS	By MS/MS	By MS/MS	By matching	By matching	By MS/MS	By MS/MS	By MS/MS	By MS/MS	By MS/MS	By MS/MS	153210000	15518000	10515000	12318000	5273500	10420000	6854800	14109000	6622900	10320000	6983700	2218300	9683300	2923800	8726200	13002000	3009300	7437800	7271800
P14618;P30613	P14618	Pyruvate kinase PKM	PKM	sp|P14618|KPYM_HUMAN Pyruvate kinase PKM OS=Homo sapiens OX=9606 GN=PKM PE=1 SV=4	By MS/MS	By MS/MS	By MS/MS	By MS/MS	By MS/MS	By MS/MS	By MS/MS	By MS/MS	By MS/MS	By MS/MS	By MS/MS	By MS/MS	By MS/MS	By MS/MS	By MS/MS	By MS/MS	By MS/MS	By MS/MS	152580000	17800000	10086000	16702000	6580900	6775700	5164800	6973100	2170000	8333500	4912000	6812600	8063400	2296700	8531400	13421000	4316600	13661000	9974600
P12268;P20839	P12268	Inosine-5-monophosphate dehydrogenase 2	IMPDH2	sp|P12268|IMDH2_HUMAN Inosine-5-monophosphate dehydrogenase 2 OS=Homo sapiens OX=9606 GN=IMPDH2 PE=1 SV=2	By MS/MS	By MS/MS	By MS/MS	By MS/MS	By MS/MS	By MS/MS	By MS/MS	By MS/MS	By MS/MS	By MS/MS	By MS/MS	By MS/MS	By MS/MS	By MS/MS	By MS/MS	By MS/MS	By MS/MS	By MS/MS	151380000	13897000	12183000	6771200	5595100	7123000	8605800	12449000	4419500	8275800	4752700	10598000	7291200	4760300	6588800	12236000	6458300	11891000	7490400
Q00839	Q00839	Heterogeneous nuclear ribonucleoprotein U	HNRNPU	sp|Q00839|HNRPU_HUMAN Heterogeneous nuclear ribonucleoprotein U OS=Homo sapiens OX=9606 GN=HNRNPU PE=1 SV=6	By MS/MS	By MS/MS	By MS/MS	By MS/MS	By MS/MS	By MS/MS	By MS/MS	By MS/MS	By MS/MS	By MS/MS	By MS/MS	By MS/MS	By MS/MS	By MS/MS	By MS/MS	By MS/MS	By MS/MS	By MS/MS	150920000	16571000	10128000	15635000	7023000	10819000	7530100	14755000	5139100	9763200	5829100	10468000	6082100	2971000	7850900	8248400	3268800	4825300	4013500
P27824	P27824	Calnexin	CANX	sp|P27824|CALX_HUMAN Calnexin OS=Homo sapiens OX=9606 GN=CANX PE=1 SV=2	By MS/MS	By MS/MS	By MS/MS	By MS/MS	By MS/MS	By MS/MS	By MS/MS	By MS/MS	By MS/MS	By MS/MS	By MS/MS	By MS/MS	By matching	By MS/MS	By MS/MS	By MS/MS	By MS/MS	By MS/MS	149830000	12949000	7590100	13174000	4620000	20566000	4788000	11006000	5194800	10928000	6994800	7284600	6984100	2274400	7150300	10033000	3714500	8624000	5952400
P06733;P13929;P09104	P06733	Alpha-enolase	ENO1	sp|P06733|ENOA_HUMAN Alpha-enolase OS=Homo sapiens OX=9606 GN=ENO1 PE=1 SV=2	By MS/MS	By MS/MS	By MS/MS	By MS/MS	By MS/MS	By MS/MS	By MS/MS	By MS/MS	By MS/MS	By MS/MS	By MS/MS	By MS/MS	By MS/MS	By MS/MS	By MS/MS	By MS/MS	By MS/MS	By MS/MS	149780000	15944000	10314000	18322000	6060600	11249000	6245700	11683000	4351500	9670800	6131500	7420100	5457500	3757500	5981100	8228200	3077500	6905800	8978700
O00622	O00622	CCN family member 1	CCN1	sp|O00622|CCN1_HUMAN CCN family member 1 OS=Homo sapiens OX=9606 GN=CCN1 PE=1 SV=1	By MS/MS	By MS/MS	By MS/MS	By MS/MS	By MS/MS	None	By MS/MS	By matching	By MS/MS	By MS/MS	By MS/MS	By MS/MS	None	By MS/MS	By matching	By MS/MS	None	By MS/MS	148940000	10162000	17952000	4212700	7534400	7799000	0	25319000	4289800	21586000	3417500	20079000	7606400	0	4205000	6060600	4571000	0	4142600
Q9UBX7	Q9UBX7	Kallikrein-11;Kallikrein-11 inactive chain 1;Kallikrein-11 inactive chain 2	KLK11	sp|Q9UBX7|KLK11_HUMAN Kallikrein-11 OS=Homo sapiens OX=9606 GN=KLK11 PE=1 SV=2	By MS/MS	By MS/MS	By MS/MS	By MS/MS	By MS/MS	By MS/MS	By MS/MS	By MS/MS	By MS/MS	By MS/MS	By MS/MS	By MS/MS	By MS/MS	By MS/MS	By MS/MS	By MS/MS	By MS/MS	By MS/MS	148690000	10433000	13635000	2377200	9143400	2514600	13363000	17413000	7574100	422790	5449300	4176800	6427100	7183900	10185000	10783000	8974700	10238000	8391700
P51571	P51571	Translocon-associated protein subunit delta	SSR4	sp|P51571|SSRD_HUMAN Translocon-associated protein subunit delta OS=Homo sapiens OX=9606 GN=SSR4 PE=1 SV=1	By MS/MS	By matching	By MS/MS	By matching	By MS/MS	By matching	By MS/MS	By matching	By MS/MS	By MS/MS	By matching	By matching	By matching	By matching	By MS/MS	By matching	By matching	By matching	147970000	12894000	11533000	13887000	4488800	12630000	3173700	12569000	7356600	12594000	5638200	5451800	6366900	4161500	6234600	10778000	996740	7814400	9398800
P35232	P35232	Prohibitin 1	PHB1	sp|P35232|PHB1_HUMAN Prohibitin 1 OS=Homo sapiens OX=9606 GN=PHB1 PE=1 SV=1	By MS/MS	By MS/MS	By MS/MS	By MS/MS	By MS/MS	By MS/MS	By MS/MS	By MS/MS	By MS/MS	By MS/MS	By matching	By MS/MS	By matching	By MS/MS	By MS/MS	By MS/MS	By MS/MS	By MS/MS	146910000	14894000	8758800	12386000	4947700	12944000	4175200	12383000	5190500	14897000	6515400	7253400	4902200	2010900	7286800	10680000	3029300	7781800	6876300
P14314	P14314	Glucosidase 2 subunit beta	PRKCSH	sp|P14314|GLU2B_HUMAN Glucosidase 2 subunit beta OS=Homo sapiens OX=9606 GN=PRKCSH PE=1 SV=2	By MS/MS	By MS/MS	By MS/MS	By MS/MS	By MS/MS	By MS/MS	By MS/MS	By MS/MS	By MS/MS	By MS/MS	By MS/MS	By MS/MS	By matching	By MS/MS	By MS/MS	By MS/MS	By MS/MS	By MS/MS	146360000	15987000	11415000	17588000	5492100	12439000	4153000	15395000	4850700	15604000	5031500	8488900	4161500	1341800	3084200	9760100	1877900	4369400	5321500
Q9H0U4;P62820;Q92928;P61026;P51153;Q92930;P61006;P59190	Q9H0U4;P62820;Q92928	Ras-related protein Rab-1B;Ras-related protein Rab-1A;Putative Ras-related protein Rab-1C	RAB1B;RAB1A;RAB1C	sp|Q9H0U4|RAB1B_HUMAN Ras-related protein Rab-1B OS=Homo sapiens OX=9606 GN=RAB1B PE=1 SV=1;sp|P62820|RAB1A_HUMAN Ras-related protein Rab-1A OS=Homo sapiens OX=9606 GN=RAB1A PE=1 SV=3;sp|Q92928|RAB1C_HUMAN Putative Ras-related protein Rab-1C OS=Homo sapien	By MS/MS	By MS/MS	By MS/MS	By MS/MS	By MS/MS	By MS/MS	By MS/MS	By MS/MS	By MS/MS	By MS/MS	By MS/MS	By MS/MS	By matching	By MS/MS	By MS/MS	By MS/MS	By MS/MS	By MS/MS	145650000	23107000	9538200	8439200	5630000	12483000	4812300	13663000	4593600	9748100	5545900	7171500	5616400	1444100	5893700	10118000	3783000	8694000	5369500
P10828	P10828	Thyroid hormone receptor beta	THRB	sp|P10828|THB_HUMAN Thyroid hormone receptor beta OS=Homo sapiens OX=9606 GN=THRB PE=1 SV=2	By MS/MS	None	By MS/MS	By MS/MS	By MS/MS	By MS/MS	By MS/MS	By MS/MS	By MS/MS	By MS/MS	By matching	By MS/MS	By MS/MS	By MS/MS	By MS/MS	By MS/MS	By MS/MS	By MS/MS	144470000	10257000	0	7651100	10060000	2876000	8776900	4249800	15190000	10691000	7151200	2969500	7446400	9602900	6640800	10004000	11550000	8190200	11159000
P68133;P68032;P63267;P62736	P68133;P68032;P63267;P62736	Actin, alpha skeletal muscle;Actin, alpha skeletal muscle, intermediate form;Actin, alpha cardiac muscle 1;Actin, alpha cardiac muscle 1, intermediate form;Actin, gamma-enteric smooth muscle;Actin, gamma-enteric smooth muscle, intermediate form;Actin, aortic smooth muscle;Actin, aortic smooth muscle, intermediate form	ACTA1;ACTC1;ACTG2;ACTA2	sp|P68133|ACTS_HUMAN Actin, alpha skeletal muscle OS=Homo sapiens OX=9606 GN=ACTA1 PE=1 SV=1;sp|P68032|ACTC_HUMAN Actin, alpha cardiac muscle 1 OS=Homo sapiens OX=9606 GN=ACTC1 PE=1 SV=1;sp|P63267|ACTH_HUMAN Actin, gamma-enteric smooth muscle OS=Homo sapie	By MS/MS	By MS/MS	By MS/MS	By MS/MS	By MS/MS	By MS/MS	By MS/MS	By MS/MS	By MS/MS	By MS/MS	By MS/MS	By MS/MS	By MS/MS	By MS/MS	By MS/MS	By MS/MS	By MS/MS	By MS/MS	143410000	28187000	11967000	10624000	6983300	3466000	4608800	13073000	3260800	8289000	3828400	5445400	4709600	1577200	7792400	10790000	4772300	8300300	5740200
P52815	P52815	Large ribosomal subunit protein bL12m	MRPL12	sp|P52815|RM12_HUMAN Large ribosomal subunit protein bL12m OS=Homo sapiens OX=9606 GN=MRPL12 PE=1 SV=2	By MS/MS	By MS/MS	By MS/MS	By MS/MS	By MS/MS	By MS/MS	By MS/MS	By matching	By MS/MS	By matching	By MS/MS	By MS/MS	By MS/MS	By MS/MS	By MS/MS	By MS/MS	By MS/MS	By matching	140780000	14290000	2652800	6697500	4947600	7054900	1539400	12808000	985360	13032000	5705000	7963400	7913900	7055400	9868000	15147000	8105500	7397700	7618700
P51572	P51572	B-cell receptor-associated protein 31	BCAP31	sp|P51572|BAP31_HUMAN B-cell receptor-associated protein 31 OS=Homo sapiens OX=9606 GN=BCAP31 PE=1 SV=3	By MS/MS	By MS/MS	By MS/MS	By MS/MS	By MS/MS	By MS/MS	By MS/MS	By MS/MS	By MS/MS	By MS/MS	By MS/MS	By MS/MS	By MS/MS	By MS/MS	By MS/MS	By MS/MS	By MS/MS	By MS/MS	140330000	11077000	11497000	10403000	5531500	9243800	6141800	12097000	4220700	5399600	7508400	7912000	7667900	2852000	7793700	12425000	4165400	6461600	7932800
Q9NRW1;P20340;Q14964	Q9NRW1;P20340;Q14964	Ras-related protein Rab-6B;Ras-related protein Rab-6A;Ras-related protein Rab-39A	RAB6B;RAB6A;RAB39A	sp|Q9NRW1|RAB6B_HUMAN Ras-related protein Rab-6B OS=Homo sapiens OX=9606 GN=RAB6B PE=1 SV=1;sp|P20340|RAB6A_HUMAN Ras-related protein Rab-6A OS=Homo sapiens OX=9606 GN=RAB6A PE=1 SV=3;sp|Q14964|RB39A_HUMAN Ras-related protein Rab-39A OS=Homo sapiens OX=960	By MS/MS	By MS/MS	By MS/MS	By MS/MS	By MS/MS	By MS/MS	By MS/MS	By matching	By MS/MS	By MS/MS	By MS/MS	By matching	By MS/MS	By MS/MS	By MS/MS	By matching	By MS/MS	By MS/MS	140120000	22741000	9088800	10319000	4871600	8078800	4885500	13169000	4130400	12112000	6042300	5500500	5765800	1788000	6533400	7870700	3563400	8137500	5518700
P41208;Q12798	P41208	Centrin-2	CETN2	sp|P41208|CETN2_HUMAN Centrin-2 OS=Homo sapiens OX=9606 GN=CETN2 PE=1 SV=1	By MS/MS	By MS/MS	By MS/MS	By MS/MS	By MS/MS	By MS/MS	By MS/MS	By MS/MS	By matching	By MS/MS	By MS/MS	By MS/MS	By MS/MS	By MS/MS	By MS/MS	By MS/MS	By MS/MS	By MS/MS	135790000	8005600	4639300	1251500	7226400	5554700	7687900	5612000	3451200	7109800	6399700	18280000	9695600	8690500	10231000	13355000	9856000	4529200	4211700
Q8TDN6	Q8TDN6	Ribosome biogenesis protein BRX1 homolog	BRIX1	sp|Q8TDN6|BRX1_HUMAN Ribosome biogenesis protein BRX1 homolog OS=Homo sapiens OX=9606 GN=BRIX1 PE=1 SV=2	By MS/MS	By MS/MS	By MS/MS	By MS/MS	By MS/MS	By MS/MS	By MS/MS	By MS/MS	By MS/MS	By MS/MS	By MS/MS	By MS/MS	By MS/MS	By MS/MS	By MS/MS	By matching	By matching	By MS/MS	135110000	13187000	11448000	5027500	8933600	6057000	7325900	31900000	2544500	4536200	1480900	25016000	4444300	1528500	2104900	3239400	1961500	934600	3441700
P51149	P51149	Ras-related protein Rab-7a	RAB7A	sp|P51149|RAB7A_HUMAN Ras-related protein Rab-7a OS=Homo sapiens OX=9606 GN=RAB7A PE=1 SV=1	By MS/MS	By MS/MS	By MS/MS	By MS/MS	By MS/MS	By MS/MS	By MS/MS	By MS/MS	By MS/MS	By MS/MS	By matching	By MS/MS	By matching	By MS/MS	By MS/MS	By MS/MS	By MS/MS	By MS/MS	134900000	17020000	8387200	15254000	4165700	9760300	3980900	13191000	7038000	14205000	6066500	6642600	5236300	1004700	2816500	5915700	2639500	6316600	5263700
P27797	P27797	Calreticulin	CALR	sp|P27797|CALR_HUMAN Calreticulin OS=Homo sapiens OX=9606 GN=CALR PE=1 SV=1	By MS/MS	By MS/MS	By MS/MS	By MS/MS	By MS/MS	By MS/MS	By MS/MS	By MS/MS	By MS/MS	By MS/MS	By MS/MS	By MS/MS	By MS/MS	By MS/MS	By MS/MS	By MS/MS	By MS/MS	By MS/MS	134670000	13748000	10425000	15663000	5552300	8785900	4301700	14001000	5422500	11299000	6651600	5963600	4570700	1650700	3870400	9009500	1959800	5157900	6634000
P40926	P40926	Malate dehydrogenase, mitochondrial	MDH2	sp|P40926|MDHM_HUMAN Malate dehydrogenase, mitochondrial OS=Homo sapiens OX=9606 GN=MDH2 PE=1 SV=3	By MS/MS	By MS/MS	By MS/MS	By MS/MS	By MS/MS	By MS/MS	By MS/MS	By MS/MS	By MS/MS	By MS/MS	By MS/MS	By MS/MS	By matching	By MS/MS	By MS/MS	By matching	By MS/MS	By MS/MS	134260000	14613000	9693400	15343000	4246600	14649000	1738900	12113000	3187900	12237000	7457400	5531100	6134200	1929700	4813600	9978700	2797000	6071400	1721600
Q99714	Q99714	3-hydroxyacyl-CoA dehydrogenase type-2	HSD17B10	sp|Q99714|HCD2_HUMAN 3-hydroxyacyl-CoA dehydrogenase type-2 OS=Homo sapiens OX=9606 GN=HSD17B10 PE=1 SV=3	By MS/MS	By MS/MS	By MS/MS	By MS/MS	By MS/MS	By MS/MS	By MS/MS	By MS/MS	By MS/MS	By MS/MS	By MS/MS	By MS/MS	By MS/MS	By MS/MS	By MS/MS	By MS/MS	By MS/MS	By MS/MS	132880000	10593000	6863800	3182300	3016200	7394300	6273400	6372200	3453900	6845600	3478200	5581400	9457600	4005300	7643900	15335000	11028000	14415000	7944700
Q9NR30	Q9NR30	Nucleolar RNA helicase 2	DDX21	sp|Q9NR30|DDX21_HUMAN Nucleolar RNA helicase 2 OS=Homo sapiens OX=9606 GN=DDX21 PE=1 SV=5	By MS/MS	By MS/MS	By MS/MS	By MS/MS	By MS/MS	By MS/MS	By MS/MS	By MS/MS	By MS/MS	By MS/MS	By MS/MS	By MS/MS	By MS/MS	By MS/MS	By MS/MS	By MS/MS	By MS/MS	By MS/MS	131880000	10121000	8267800	3554500	5358700	4354700	6237300	15888000	4649500	8985300	6683400	16259000	6999700	3955000	8340300	9273900	3806700	5159400	3990800
Q6DKI1	Q6DKI1	Ribosomal protein uL30-like	RPL7L1	sp|Q6DKI1|RL7L_HUMAN Ribosomal protein uL30-like OS=Homo sapiens OX=9606 GN=RPL7L1 PE=1 SV=2	By MS/MS	By MS/MS	By MS/MS	By MS/MS	By MS/MS	By MS/MS	By MS/MS	By MS/MS	By MS/MS	By MS/MS	By MS/MS	By MS/MS	By MS/MS	By matching	By matching	By MS/MS	By matching	By matching	131240000	10811000	11032000	4159900	8953800	4438100	6835000	22562000	4151200	11638000	3551700	21148000	5262500	3215800	2121000	2729100	2902000	2822500	2912100
P08708	P08708	Small ribosomal subunit protein eS17	RPS17	sp|P08708|RS17_HUMAN Small ribosomal subunit protein eS17 OS=Homo sapiens OX=9606 GN=RPS17 PE=1 SV=2	By MS/MS	By MS/MS	By matching	By MS/MS	By MS/MS	By MS/MS	By MS/MS	By matching	By matching	By matching	By MS/MS	By matching	By matching	By matching	By matching	By matching	None	By MS/MS	131020000	26469000	9523700	6704400	6686600	7849300	6703300	26302000	5112800	4021800	3621700	15948000	2975800	1106100	1734800	1550700	1335500	0	3371700
P09234	P09234	U1 small nuclear ribonucleoprotein C	SNRPC	sp|P09234|RU1C_HUMAN U1 small nuclear ribonucleoprotein C OS=Homo sapiens OX=9606 GN=SNRPC PE=1 SV=1	By matching	By MS/MS	By MS/MS	By MS/MS	By MS/MS	By matching	By matching	None	By matching	By matching	By MS/MS	By matching	By matching	By matching	By matching	By matching	By matching	By matching	128230000	8341400	10494000	11610000	8162300	7106600	8581800	9047600	0	10505000	3874400	9371600	3415700	3521400	8489300	5850200	5180200	6480000	8194800
P46783;Q9NQ39	P46783	Small ribosomal subunit protein eS10	RPS10	sp|P46783|RS10_HUMAN Small ribosomal subunit protein eS10 OS=Homo sapiens OX=9606 GN=RPS10 PE=1 SV=1	By MS/MS	By MS/MS	By MS/MS	By MS/MS	By MS/MS	By MS/MS	By MS/MS	By MS/MS	By MS/MS	By MS/MS	By MS/MS	By MS/MS	By MS/MS	By MS/MS	By matching	By matching	By MS/MS	By MS/MS	124650000	9064600	10942000	7422800	6749500	5152200	9632900	14865000	5071900	13346000	5285300	11965000	4057100	4449700	3145700	4015800	2127100	5629600	1727000
P35579;P35580;P35749	P35579	Myosin-9	MYH9	sp|P35579|MYH9_HUMAN Myosin-9 OS=Homo sapiens OX=9606 GN=MYH9 PE=1 SV=4	By MS/MS	By MS/MS	By MS/MS	By MS/MS	By MS/MS	By MS/MS	By MS/MS	By MS/MS	By MS/MS	By MS/MS	By MS/MS	By MS/MS	By MS/MS	By MS/MS	By MS/MS	By MS/MS	By MS/MS	By MS/MS	123810000	14261000	6084900	5251200	6711200	3214100	4923900	10711000	3345300	3706500	5486100	9916800	6330400	1955800	7138800	8245800	4879500	13294000	8355300
P09496	P09496	Clathrin light chain A	CLTA	sp|P09496|CLCA_HUMAN Clathrin light chain A OS=Homo sapiens OX=9606 GN=CLTA PE=1 SV=1	By MS/MS	By MS/MS	By MS/MS	By MS/MS	By MS/MS	By MS/MS	By MS/MS	By MS/MS	By MS/MS	By MS/MS	By MS/MS	By MS/MS	By MS/MS	By MS/MS	By MS/MS	By MS/MS	By MS/MS	By MS/MS	123380000	10368000	8816900	7783600	5153100	5198400	6058300	9912400	4753900	4185800	5199200	7678300	5965600	4951700	6830100	9852000	5399600	7073400	8199800
O95218	O95218	Zinc finger Ran-binding domain-containing protein 2	ZRANB2	sp|O95218|ZRAB2_HUMAN Zinc finger Ran-binding domain-containing protein 2 OS=Homo sapiens OX=9606 GN=ZRANB2 PE=1 SV=2	By MS/MS	By MS/MS	By MS/MS	By MS/MS	By MS/MS	By MS/MS	By MS/MS	By MS/MS	By MS/MS	By MS/MS	By MS/MS	By MS/MS	By MS/MS	By MS/MS	By MS/MS	By MS/MS	By MS/MS	By MS/MS	121280000	5250600	10465000	2477300	6913500	2983400	7493400	11163000	3979900	4390800	3841900	18626000	7423500	5466600	6829900	7992800	4021100	5387100	6570900
P02656	P02656	Apolipoprotein C-III	APOC3	sp|P02656|APOC3_HUMAN Apolipoprotein C-III OS=Homo sapiens OX=9606 GN=APOC3 PE=1 SV=1	By MS/MS	By MS/MS	By MS/MS	By MS/MS	By MS/MS	By MS/MS	By MS/MS	By MS/MS	By MS/MS	By MS/MS	By MS/MS	By MS/MS	By MS/MS	By MS/MS	By MS/MS	By MS/MS	By MS/MS	By MS/MS	119460000	6334100	4135000	3521400	3038500	3916500	5113500	9525400	7177000	5964500	6810100	7198700	9685600	3307900	10717000	12844000	5115800	8491700	6559200
Q04837	Q04837	Single-stranded DNA-binding protein, mitochondrial	SSBP1	sp|Q04837|SSBP_HUMAN Single-stranded DNA-binding protein, mitochondrial OS=Homo sapiens OX=9606 GN=SSBP1 PE=1 SV=1	By MS/MS	By MS/MS	By MS/MS	By MS/MS	By matching	By MS/MS	By MS/MS	By MS/MS	By MS/MS	By MS/MS	By MS/MS	By MS/MS	By MS/MS	By MS/MS	By MS/MS	By MS/MS	By MS/MS	By MS/MS	115920000	9287100	10354000	4246300	6182400	3885700	5745700	11192000	4648700	6320200	3489000	9589200	4371300	3975500	8104000	8877200	5307800	5967700	4373000
O43324	O43324	Eukaryotic translation elongation factor 1 epsilon-1	EEF1E1	sp|O43324|MCA3_HUMAN Eukaryotic translation elongation factor 1 epsilon-1 OS=Homo sapiens OX=9606 GN=EEF1E1 PE=1 SV=1	By MS/MS	By MS/MS	By MS/MS	By matching	By MS/MS	By MS/MS	By MS/MS	By matching	By MS/MS	By MS/MS	By MS/MS	By MS/MS	By matching	By MS/MS	By MS/MS	By MS/MS	By MS/MS	By MS/MS	114240000	11269000	6391100	3005400	3230800	5763400	6975100	14390000	3176700	8183100	4266800	7032400	4699700	2848900	4039500	13977000	3686900	7139400	4167000
Q9BVC6	Q9BVC6	Voltage-gated monoatomic cation channel TMEM109	TMEM109	sp|Q9BVC6|TM109_HUMAN Voltage-gated monoatomic cation channel TMEM109 OS=Homo sapiens OX=9606 GN=TMEM109 PE=1 SV=1	By MS/MS	By MS/MS	By MS/MS	By MS/MS	By MS/MS	By MS/MS	None	By MS/MS	By MS/MS	By MS/MS	By MS/MS	By MS/MS	By MS/MS	By MS/MS	By MS/MS	By matching	By MS/MS	By MS/MS	112680000	9404700	4516600	9757900	4293800	8832200	5813900	0	6302800	9992200	6353600	7502100	5039700	3022300	4645000	10192000	2921000	5841000	8248300
Q8IYA7	Q8IYA7	Homeobox protein Mohawk	MKX	sp|Q8IYA7|MKX_HUMAN Homeobox protein Mohawk OS=Homo sapiens OX=9606 GN=MKX PE=1 SV=2	By MS/MS	By MS/MS	By MS/MS	By MS/MS	By MS/MS	By MS/MS	By MS/MS	By MS/MS	By MS/MS	By MS/MS	By MS/MS	By MS/MS	By MS/MS	By MS/MS	By MS/MS	By MS/MS	By MS/MS	By MS/MS	112150000	6862400	5478900	2814900	3595900	4052400	6264600	5148900	4033100	7121500	4265500	9086700	7120200	3423400	6024900	13565000	8238000	8266900	6784700
P02794	P02794	Ferritin heavy chain;Ferritin heavy chain, N-terminally processed	FTH1	sp|P02794|FRIH_HUMAN Ferritin heavy chain OS=Homo sapiens OX=9606 GN=FTH1 PE=1 SV=2	By MS/MS	By MS/MS	By MS/MS	By MS/MS	By MS/MS	By MS/MS	By MS/MS	By MS/MS	By MS/MS	By MS/MS	By matching	By MS/MS	By MS/MS	By MS/MS	By MS/MS	By matching	By MS/MS	By MS/MS	111980000	9747800	5743300	5097400	5963100	5125900	8393800	10247000	5846800	4480000	5054300	5473600	8312300	5186500	4822100	5332500	3237300	5996000	7921400
P61956;Q6EEV6;P55854	P61956;Q6EEV6;P55854	Small ubiquitin-related modifier 2;Small ubiquitin-related modifier 4;Small ubiquitin-related modifier 3	SUMO2;SUMO4;SUMO3	sp|P61956|SUMO2_HUMAN Small ubiquitin-related modifier 2 OS=Homo sapiens OX=9606 GN=SUMO2 PE=1 SV=3;sp|Q6EEV6|SUMO4_HUMAN Small ubiquitin-related modifier 4 OS=Homo sapiens OX=9606 GN=SUMO4 PE=1 SV=3;sp|P55854|SUMO3_HUMAN Small ubiquitin-related modifier 3	By MS/MS	By matching	By MS/MS	By matching	By MS/MS	By MS/MS	By matching	By matching	By MS/MS	By MS/MS	By matching	By matching	By matching	By MS/MS	By MS/MS	By MS/MS	By matching	By MS/MS	109600000	16965000	1292400	14008000	749280	10186000	12212000	1828400	709420	13803000	6033400	1842400	488330	481190	6623000	7423500	5112600	508850	9330600
Q12905	Q12905	Interleukin enhancer-binding factor 2	ILF2	sp|Q12905|ILF2_HUMAN Interleukin enhancer-binding factor 2 OS=Homo sapiens OX=9606 GN=ILF2 PE=1 SV=2	By MS/MS	By MS/MS	By MS/MS	By MS/MS	By MS/MS	By MS/MS	By MS/MS	By matching	By MS/MS	By matching	By MS/MS	By matching	By matching	By matching	By matching	None	By matching	By matching	106950000	15805000	16717000	11783000	7999800	6230100	3684200	16305000	1257500	10623000	1097500	11563000	996890	240020	228610	754550	0	621700	1046700
P10599	P10599	Thioredoxin	TXN	sp|P10599|THIO_HUMAN Thioredoxin OS=Homo sapiens OX=9606 GN=TXN PE=1 SV=3	By MS/MS	By MS/MS	By MS/MS	By MS/MS	By MS/MS	By MS/MS	By MS/MS	By matching	By MS/MS	By MS/MS	By MS/MS	By matching	By MS/MS	By MS/MS	By MS/MS	By matching	By MS/MS	By MS/MS	104490000	7970700	8890800	6664200	3566100	7143600	5071700	9507500	3056500	6351100	5697700	7647300	4391000	3123600	4894800	6887600	3144200	5630600	4848600
P14174	P14174	Macrophage migration inhibitory factor	MIF	sp|P14174|MIF_HUMAN Macrophage migration inhibitory factor OS=Homo sapiens OX=9606 GN=MIF PE=1 SV=4	By MS/MS	By MS/MS	By MS/MS	By MS/MS	By MS/MS	By matching	By MS/MS	By matching	By MS/MS	By matching	None	By matching	By matching	By MS/MS	By matching	None	By MS/MS	None	104330000	9014000	8356500	8394900	5850900	10835000	2446100	16715000	5816600	7645600	5343000	0	4284900	4656400	7330100	3837300	0	3802900	0
O00193	O00193	Small acidic protein	SMAP	sp|O00193|SMAP_HUMAN Small acidic protein OS=Homo sapiens OX=9606 GN=SMAP PE=1 SV=1	By matching	By matching	By matching	By MS/MS	By matching	By MS/MS	By matching	By MS/MS	By MS/MS	By MS/MS	By MS/MS	By matching	By MS/MS	By MS/MS	By MS/MS	By MS/MS	By MS/MS	By MS/MS	103900000	3691200	4934800	3046000	4753700	3016200	10091000	5023300	4728500	3667000	3771100	9857400	8628000	6532800	6218500	7300900	5146900	5565900	7931100
Q9NX58	Q9NX58	Cell growth-regulating nucleolar protein	LYAR	sp|Q9NX58|LYAR_HUMAN Cell growth-regulating nucleolar protein OS=Homo sapiens OX=9606 GN=LYAR PE=1 SV=3	By MS/MS	By MS/MS	By MS/MS	By MS/MS	By MS/MS	By MS/MS	By MS/MS	By MS/MS	By MS/MS	By MS/MS	By MS/MS	By MS/MS	By MS/MS	By matching	None	By matching	None	By matching	103560000	7963300	9024600	1902500	7245800	4083800	7261600	9963500	5726400	12730000	3571800	18613000	4167300	2841000	2432700	0	2218700	0	3815500
Q13185;P83916	Q13185	Chromobox protein homolog 3	CBX3	sp|Q13185|CBX3_HUMAN Chromobox protein homolog 3 OS=Homo sapiens OX=9606 GN=CBX3 PE=1 SV=4	By matching	By matching	By MS/MS	By MS/MS	By MS/MS	By matching	By matching	By matching	By MS/MS	By matching	By MS/MS	By matching	By matching	By matching	By matching	By matching	By matching	By matching	98834000	2204700	6523000	12604000	8529200	8261200	5243800	9820400	3323300	12584000	3342000	12842000	1452700	938160	4096200	1404600	377290	739750	4548300
P42677	P42677	Small ribosomal subunit protein eS27	RPS27	sp|P42677|RS27_HUMAN Small ribosomal subunit protein eS27 OS=Homo sapiens OX=9606 GN=RPS27 PE=1 SV=3	By MS/MS	By MS/MS	By MS/MS	By matching	By matching	By MS/MS	By MS/MS	By matching	None	By matching	By MS/MS	By matching	By matching	By matching	By matching	By matching	By matching	By matching	97908000	10181000	8656700	6283400	5182200	4059600	5558600	11820000	3936200	0	3496800	9885200	4131600	3308000	3790500	4500100	2611500	5629700	4877500
O76000	O76000	Putative olfactory receptor 2B3	OR2B3	sp|O76000|OR2B3_HUMAN Putative olfactory receptor 2B3 OS=Homo sapiens OX=9606 GN=OR2B3 PE=3 SV=1	By MS/MS	By MS/MS	By matching	By MS/MS	By MS/MS	By matching	By MS/MS	By matching	By MS/MS	By matching	By MS/MS	None	By matching	None	By matching	By matching	By matching	By matching	97628000	11866000	20596000	1956400	3115800	3982300	2540100	20449000	3057100	11485000	2020100	8645300	0	530600	0	3290300	1112000	1750800	1231100
P04259	P04259	Keratin, type II cytoskeletal 6B	KRT6B	sp|P04259|K2C6B_HUMAN Keratin, type II cytoskeletal 6B OS=Homo sapiens OX=9606 GN=KRT6B PE=1 SV=5	By MS/MS	By MS/MS	By MS/MS	By matching	By MS/MS	By MS/MS	By matching	By matching	By matching	By MS/MS	By MS/MS	By matching	By matching	By MS/MS	By matching	By MS/MS	By MS/MS	By matching	97262000	5491900	3168600	2217600	1462300	51982000	2504500	815390	0	495990	1537100	15304000	117690	528830	1819300	2185300	1826400	5399000	406110
Q9P0M6	Q9P0M6	Core histone macro-H2A.2	MACROH2A2	sp|Q9P0M6|H2AW_HUMAN Core histone macro-H2A.2 OS=Homo sapiens OX=9606 GN=MACROH2A2 PE=1 SV=3	By MS/MS	By MS/MS	By MS/MS	By MS/MS	By MS/MS	By MS/MS	By MS/MS	By MS/MS	By MS/MS	By MS/MS	By MS/MS	By MS/MS	By MS/MS	By MS/MS	By MS/MS	By MS/MS	By MS/MS	By MS/MS	96840000	8218000	7348900	1979500	4853600	4154100	5412200	9461400	2913300	3578700	2720200	8455100	4329500	3431600	4974300	10140000	4509400	5674300	4685900
O60832	O60832	H/ACA ribonucleoprotein complex subunit DKC1	DKC1	sp|O60832|DKC1_HUMAN H/ACA ribonucleoprotein complex subunit DKC1 OS=Homo sapiens OX=9606 GN=DKC1 PE=1 SV=3	By MS/MS	By MS/MS	By MS/MS	By MS/MS	By MS/MS	By MS/MS	By MS/MS	By MS/MS	By MS/MS	By MS/MS	By MS/MS	By MS/MS	By MS/MS	By MS/MS	By MS/MS	By MS/MS	By MS/MS	By MS/MS	96601000	8820900	7744100	2838700	6046000	4271000	4703000	13506000	3772100	9920800	2884400	12353000	2835300	3030800	1564700	4336000	3423500	2010900	2538400
P30040	P30040	Endoplasmic reticulum resident protein 29	ERP29	sp|P30040|ERP29_HUMAN Endoplasmic reticulum resident protein 29 OS=Homo sapiens OX=9606 GN=ERP29 PE=1 SV=4	By matching	By MS/MS	By MS/MS	By MS/MS	By MS/MS	By matching	By MS/MS	By matching	By MS/MS	By matching	By matching	By matching	By matching	By matching	By MS/MS	By matching	By matching	By matching	96544000	8154700	5180200	10360000	2957000	15067000	3038700	7001000	3497100	10313000	4637600	6027300	3574200	1017100	2355400	5421500	1632300	3047200	3262400
P62304	P62304	Small nuclear ribonucleoprotein E	SNRPE	sp|P62304|RUXE_HUMAN Small nuclear ribonucleoprotein E OS=Homo sapiens OX=9606 GN=SNRPE PE=1 SV=1	By MS/MS	By MS/MS	None	By matching	By matching	By matching	By matching	By matching	By MS/MS	None	By matching	By MS/MS	By MS/MS	By matching	By matching	By MS/MS	By matching	By matching	94516000	18140000	11538000	0	2273400	1880500	15088000	3177800	1306700	17188000	0	3716900	984700	1230800	3340000	2178200	8936700	1260100	2277300
Q71UM5	Q71UM5	Ribosomal protein eS27-like	RPS27L	sp|Q71UM5|RS27L_HUMAN Ribosomal protein eS27-like OS=Homo sapiens OX=9606 GN=RPS27L PE=1 SV=3	By MS/MS	By matching	By MS/MS	By MS/MS	By MS/MS	By MS/MS	By MS/MS	By MS/MS	By MS/MS	By matching	By MS/MS	By matching	By matching	By MS/MS	By matching	By matching	By MS/MS	By matching	94016000	13404000	6471000	5824400	5105900	3743000	6535300	10671000	3063100	6947400	3047400	9424300	3419300	2518000	4261000	6020300	2501300	4080700	3448800
O95816	O95816	BAG family molecular chaperone regulator 2	BAG2	sp|O95816|BAG2_HUMAN BAG family molecular chaperone regulator 2 OS=Homo sapiens OX=9606 GN=BAG2 PE=1 SV=1	By MS/MS	By MS/MS	By matching	By matching	By MS/MS	By MS/MS	By matching	By MS/MS	By MS/MS	By matching	By matching	By matching	By matching	By MS/MS	By MS/MS	By matching	By MS/MS	By MS/MS	93917000	11833000	10880000	2927300	3606900	6227500	5762700	8288200	2451300	6548200	1682000	8287000	5206300	2090200	1263200	3370700	2354300	5418600	5720000
Q9Y5S9	Q9Y5S9	RNA-binding protein 8A	RBM8A	sp|Q9Y5S9|RBM8A_HUMAN RNA-binding protein 8A OS=Homo sapiens OX=9606 GN=RBM8A PE=1 SV=1	By MS/MS	By MS/MS	By MS/MS	By MS/MS	By MS/MS	By MS/MS	By MS/MS	By MS/MS	By MS/MS	By MS/MS	By MS/MS	By matching	By MS/MS	By matching	By MS/MS	By MS/MS	By MS/MS	By matching	93756000	9746400	10081000	4908000	7125500	3591800	6991200	12457000	2573500	6444000	3519900	6331400	4245400	2396400	2100900	2956400	1655600	4536100	2095500
Q969G3	Q969G3	SWI/SNF-related matrix-associated actin-dependent regulator of chromatin subfamily E member 1	SMARCE1	sp|Q969G3|SMCE1_HUMAN SWI/SNF-related matrix-associated actin-dependent regulator of chromatin subfamily E member 1 OS=Homo sapiens OX=9606 GN=SMARCE1 PE=1 SV=2	By MS/MS	By MS/MS	By MS/MS	By MS/MS	By MS/MS	By MS/MS	By MS/MS	By MS/MS	By MS/MS	By MS/MS	By MS/MS	By MS/MS	By MS/MS	By MS/MS	By MS/MS	By MS/MS	By MS/MS	By MS/MS	93145000	7284400	6632600	2817700	5067500	2360700	2418400	11036000	4549400	7081500	3536800	12676000	5604100	3083900	3228700	5544200	2239500	3280200	4702500
Q96FJ2;P63167	Q96FJ2;P63167	Dynein light chain 2, cytoplasmic;Dynein light chain 1, cytoplasmic	DYNLL2;DYNLL1	sp|Q96FJ2|DYL2_HUMAN Dynein light chain 2, cytoplasmic OS=Homo sapiens OX=9606 GN=DYNLL2 PE=1 SV=1;sp|P63167|DYL1_HUMAN Dynein light chain 1, cytoplasmic OS=Homo sapiens OX=9606 GN=DYNLL1 PE=1 SV=1	By MS/MS	By MS/MS	By MS/MS	By MS/MS	By MS/MS	By MS/MS	By MS/MS	By MS/MS	By MS/MS	By MS/MS	By MS/MS	By MS/MS	By MS/MS	By MS/MS	By MS/MS	By MS/MS	By MS/MS	By matching	93113000	12355000	8887900	5487000	5447000	3115400	5296200	10066000	4535500	2992900	3529800	7144200	3663000	2981400	3656800	4131900	2955500	3353500	3513100
Q9BRT6	Q9BRT6	Protein LLP homolog	LLPH	sp|Q9BRT6|LLPH_HUMAN Protein LLP homolog OS=Homo sapiens OX=9606 GN=LLPH PE=1 SV=1	By MS/MS	By MS/MS	By MS/MS	By MS/MS	By matching	By MS/MS	By MS/MS	By MS/MS	By MS/MS	By MS/MS	By MS/MS	By MS/MS	By MS/MS	By matching	None	By matching	None	By matching	92761000	10540000	8441400	2944800	9095000	2908800	8024300	22297000	5510300	48227000	2616100	14898000	16117000	12408000	1088700	0	1619500	0	2777300
P67809;Q9Y2T7	P67809;Q9Y2T7	Y-box-binding protein 1;Y-box-binding protein 2	YBX1;YBX2	sp|P67809|YBOX1_HUMAN Y-box-binding protein 1 OS=Homo sapiens OX=9606 GN=YBX1 PE=1 SV=3;sp|Q9Y2T7|YBOX2_HUMAN Y-box-binding protein 2 OS=Homo sapiens OX=9606 GN=YBX2 PE=1 SV=2	By MS/MS	By MS/MS	By MS/MS	By MS/MS	By MS/MS	By MS/MS	By matching	By MS/MS	By MS/MS	By MS/MS	By matching	By matching	By MS/MS	By matching	By matching	By MS/MS	By matching	By matching	92454000	10328000	10430000	4498300	5132700	3922200	7221300	8846200	3168600	6797100	2165400	8021800	3083000	3369400	2936100	2931000	2907100	2521400	4174700
Q86V81	Q86V81	THO complex subunit 4	ALYREF	sp|Q86V81|THOC4_HUMAN THO complex subunit 4 OS=Homo sapiens OX=9606 GN=ALYREF PE=1 SV=3	By MS/MS	By MS/MS	By MS/MS	By MS/MS	By MS/MS	By MS/MS	By MS/MS	By MS/MS	By MS/MS	By MS/MS	By MS/MS	By matching	By matching	By matching	By matching	By matching	By matching	By matching	90326000	5098000	8548700	7940700	4982200	7055500	4446000	14199000	2883900	10489000	3319000	13294000	3671600	888890	437570	1328600	718870	648010	1702000
P08195	P08195	Amino acid transporter heavy chain SLC3A2	SLC3A2	sp|P08195|4F2_HUMAN Amino acid transporter heavy chain SLC3A2 OS=Homo sapiens OX=9606 GN=SLC3A2 PE=1 SV=3	By MS/MS	By MS/MS	By MS/MS	By MS/MS	By MS/MS	By MS/MS	By MS/MS	By MS/MS	By MS/MS	By MS/MS	By matching	By MS/MS	By matching	By MS/MS	By MS/MS	By matching	By matching	By MS/MS	90014000	12538000	6602100	11558000	3471100	8715200	1938200	11317000	3052900	9477700	5381400	1599700	2489400	464690	2313300	3383100	421960	2470500	2818800
P62081	P62081	Small ribosomal subunit protein eS7	RPS7	sp|P62081|RS7_HUMAN Small ribosomal subunit protein eS7 OS=Homo sapiens OX=9606 GN=RPS7 PE=1 SV=1	By MS/MS	By MS/MS	By MS/MS	By MS/MS	By MS/MS	By MS/MS	By MS/MS	By MS/MS	By MS/MS	By MS/MS	By MS/MS	By MS/MS	By MS/MS	By MS/MS	By MS/MS	By matching	By MS/MS	By MS/MS	89826000	8139500	7616800	4050200	4314800	6376300	5213400	10960000	2696500	5603700	2982500	7494100	2830500	3391400	3928600	5532600	2104200	3618700	2972000
P81605	P81605	Dermcidin;Survival-promoting peptide;DCD-1	DCD	sp|P81605|DCD_HUMAN Dermcidin OS=Homo sapiens OX=9606 GN=DCD PE=1 SV=2	By MS/MS	By MS/MS	By MS/MS	By MS/MS	By matching	By matching	By MS/MS	By matching	By matching	By MS/MS	By MS/MS	By MS/MS	By matching	By MS/MS	By matching	By matching	By MS/MS	By MS/MS	87657000	6518600	13455000	2522200	6973600	855440	1547400	8403700	2125900	224360	3495200	26447000	3755400	1884700	2133200	1355900	2025600	2011500	1922000
P51608	P51608	Methyl-CpG-binding protein 2	MECP2	sp|P51608|MECP2_HUMAN Methyl-CpG-binding protein 2 OS=Homo sapiens OX=9606 GN=MECP2 PE=1 SV=1	By MS/MS	By MS/MS	By MS/MS	By MS/MS	By MS/MS	By MS/MS	By MS/MS	By MS/MS	By MS/MS	By MS/MS	By MS/MS	By matching	By matching	By matching	By matching	By matching	By matching	By MS/MS	87191000	7992800	12340000	4005300	8392400	2036000	5430100	10089000	4402000	6851400	2073400	13286000	3013400	2174400	849640	162780	775720	120880	3195500
P49411	P49411	Elongation factor Tu, mitochondrial	TUFM	sp|P49411|EFTU_HUMAN Elongation factor Tu, mitochondrial OS=Homo sapiens OX=9606 GN=TUFM PE=1 SV=3	By MS/MS	By MS/MS	By MS/MS	By MS/MS	By MS/MS	By MS/MS	By MS/MS	By MS/MS	By MS/MS	By MS/MS	By MS/MS	By MS/MS	By MS/MS	By MS/MS	By MS/MS	By MS/MS	By MS/MS	By MS/MS	86568000	10658000	5287000	6503100	3468900	6548700	3140900	6847300	2365300	4617200	3073900	4201200	3244700	2106100	4728800	7116700	2316900	7027000	3316700
Q14103	Q14103	Heterogeneous nuclear ribonucleoprotein D0	HNRNPD	sp|Q14103|HNRPD_HUMAN Heterogeneous nuclear ribonucleoprotein D0 OS=Homo sapiens OX=9606 GN=HNRNPD PE=1 SV=1	By MS/MS	By MS/MS	By MS/MS	By matching	By MS/MS	By matching	By MS/MS	By matching	By MS/MS	By matching	By MS/MS	By matching	None	None	By matching	By matching	By matching	By matching	85970000	11097000	8656000	14925000	4293600	9203000	2807600	10694000	1760200	10233000	1612800	5144500	1232600	0	0	1098200	433020	1626100	1154000
P20700	P20700	Lamin-B1	LMNB1	sp|P20700|LMNB1_HUMAN Lamin-B1 OS=Homo sapiens OX=9606 GN=LMNB1 PE=1 SV=2	By MS/MS	By MS/MS	By MS/MS	By MS/MS	By MS/MS	By MS/MS	By MS/MS	By MS/MS	By MS/MS	By MS/MS	By MS/MS	By matching	By matching	By matching	By matching	By matching	By matching	By matching	85723000	10882000	7469000	9432100	4102700	5481000	2385000	13513000	3681500	6567700	3641400	7439300	2011500	1192300	1618300	2247800	595880	1482000	1980100
O75131;Q96FN4;Q8IYJ1;Q96A23;O95741;Q86YQ8;Q9HCH3;Q9UBL6	O75131;Q96FN4;Q8IYJ1;Q96A23;O95741;Q86YQ8;Q9HCH3;Q9UBL6	Copine-3;Copine-2;Copine-9;Copine-4;Copine-6;Copine-8;Copine-5;Copine-7	CPNE3;CPNE2;CPNE9;CPNE4;CPNE6;CPNE8;CPNE5;CPNE7	sp|O75131|CPNE3_HUMAN Copine-3 OS=Homo sapiens OX=9606 GN=CPNE3 PE=1 SV=1;sp|Q96FN4|CPNE2_HUMAN Copine-2 OS=Homo sapiens OX=9606 GN=CPNE2 PE=1 SV=3;sp|Q8IYJ1|CPNE9_HUMAN Copine-9 OS=Homo sapiens OX=9606 GN=CPNE9 PE=1 SV=3;sp|Q96A23|CPNE4_HUMAN Copine-4 OS=	By MS/MS	By MS/MS	By MS/MS	By MS/MS	By MS/MS	By MS/MS	By MS/MS	By MS/MS	By MS/MS	By MS/MS	By MS/MS	By MS/MS	By MS/MS	By MS/MS	By MS/MS	By MS/MS	By MS/MS	By MS/MS	85681000	4496300	4633000	1734000	3316700	3058000	5504900	7056700	2809800	2972300	2233900	9244000	6683500	2485600	5036500	6000300	6307000	5945200	6163600
P07737	P07737	Profilin-1	PFN1	sp|P07737|PROF1_HUMAN Profilin-1 OS=Homo sapiens OX=9606 GN=PFN1 PE=1 SV=2	By MS/MS	By MS/MS	By MS/MS	By matching	By MS/MS	By matching	By matching	By MS/MS	By MS/MS	By MS/MS	By matching	By matching	By matching	By matching	By MS/MS	By matching	By MS/MS	By matching	82132000	14268000	6088500	12555000	2992100	3158700	2401100	4208900	3065600	3434900	2198100	3711300	1648100	1584500	3415000	6953300	1602100	4528200	4318500
Q5BKY9;Q8N9E0	Q5BKY9;Q8N9E0	Protein FAM133B;Protein FAM133A	FAM133B;FAM133A	sp|Q5BKY9|F133B_HUMAN Protein FAM133B OS=Homo sapiens OX=9606 GN=FAM133B PE=1 SV=1;sp|Q8N9E0|F133A_HUMAN Protein FAM133A OS=Homo sapiens OX=9606 GN=FAM133A PE=1 SV=1	By matching	None	By matching	By MS/MS	By MS/MS	By MS/MS	By MS/MS	By MS/MS	By MS/MS	By MS/MS	By MS/MS	By MS/MS	By matching	By MS/MS	By matching	By MS/MS	By matching	By MS/MS	81219000	6479500	0	1656100	5143400	1973100	7587800	7878900	3104400	2888000	2855800	9069200	4482500	3745700	4684200	6318800	4880300	3443100	5028400
P55084	P55084	Trifunctional enzyme subunit beta, mitochondrial;3-ketoacyl-CoA thiolase	HADHB	sp|P55084|ECHB_HUMAN Trifunctional enzyme subunit beta, mitochondrial OS=Homo sapiens OX=9606 GN=HADHB PE=1 SV=3	By MS/MS	By MS/MS	By MS/MS	By MS/MS	By MS/MS	By matching	By MS/MS	By matching	By MS/MS	By MS/MS	By matching	By MS/MS	By matching	By matching	By MS/MS	By matching	By MS/MS	By MS/MS	80077000	10175000	5976700	5395100	3317000	7261100	3183600	5396700	1824100	7518500	2329900	5062600	2710300	793590	2721400	3830400	2359700	7561200	2659400
P24534	P24534	Elongation factor 1-beta	EEF1B2	sp|P24534|EF1B_HUMAN Elongation factor 1-beta OS=Homo sapiens OX=9606 GN=EEF1B2 PE=1 SV=3	By matching	By matching	By MS/MS	By MS/MS	None	By MS/MS	By matching	By MS/MS	By MS/MS	By MS/MS	By matching	By matching	By matching	By MS/MS	By MS/MS	By MS/MS	By MS/MS	By MS/MS	79542000	4102000	1584500	5932600	2934300	0	3424200	3057400	5500700	4681700	4623300	1593200	5256000	3181000	9292200	7478100	3987900	6225300	6687100
P00505	P00505	Aspartate aminotransferase, mitochondrial	GOT2	sp|P00505|AATM_HUMAN Aspartate aminotransferase, mitochondrial OS=Homo sapiens OX=9606 GN=GOT2 PE=1 SV=3	By MS/MS	By MS/MS	By MS/MS	By MS/MS	By MS/MS	By matching	By MS/MS	By MS/MS	By MS/MS	By MS/MS	By MS/MS	By MS/MS	By matching	By matching	By MS/MS	By matching	By matching	By MS/MS	79270000	8404200	5328800	8093400	2595200	6682600	2128600	7373600	3472400	7105800	3749500	4321000	3342700	875330	2149900	5622500	1295400	3430200	3298700
O00264	O00264	Membrane-associated progesterone receptor component 1	PGRMC1	sp|O00264|PGRC1_HUMAN Membrane-associated progesterone receptor component 1 OS=Homo sapiens OX=9606 GN=PGRMC1 PE=1 SV=3	By MS/MS	By matching	By MS/MS	By matching	By matching	By matching	By matching	By matching	By matching	By matching	By matching	By matching	By matching	By matching	By matching	By matching	By matching	By matching	78879000	6870300	5159600	5289800	2058100	5141900	2800400	6258400	3978800	7007100	4217000	4060600	3614700	2120900	4487900	6379400	1702800	2859300	4872000
P04083	P04083	Annexin A1;Annexin Ac2-26	ANXA1	sp|P04083|ANXA1_HUMAN Annexin A1 OS=Homo sapiens OX=9606 GN=ANXA1 PE=1 SV=2	By MS/MS	By MS/MS	By MS/MS	By MS/MS	By MS/MS	By MS/MS	By MS/MS	By MS/MS	By MS/MS	By MS/MS	By MS/MS	By MS/MS	By matching	By MS/MS	By MS/MS	By MS/MS	By MS/MS	By MS/MS	78692000	7227600	3795700	5744100	2483200	6927300	1537400	6082000	2421400	7679700	3935800	6186500	2778800	960200	2157600	5570100	2126600	4219900	6857900
P04179	P04179	Superoxide dismutase [Mn], mitochondrial	SOD2	sp|P04179|SODM_HUMAN Superoxide dismutase [Mn], mitochondrial OS=Homo sapiens OX=9606 GN=SOD2 PE=1 SV=3	By MS/MS	By MS/MS	By MS/MS	By MS/MS	By MS/MS	By MS/MS	By MS/MS	By MS/MS	By MS/MS	By MS/MS	By MS/MS	By MS/MS	By MS/MS	By MS/MS	By MS/MS	By MS/MS	By MS/MS	By MS/MS	78416000	9122700	7041700	7346000	3324700	6235800	2202100	5749800	3021900	7661200	3754200	3337500	2607900	1168900	2412500	6084000	1594300	2428900	3321900
Q15293	Q15293	Reticulocalbin-1	RCN1	sp|Q15293|RCN1_HUMAN Reticulocalbin-1 OS=Homo sapiens OX=9606 GN=RCN1 PE=1 SV=1	By MS/MS	By MS/MS	By MS/MS	By MS/MS	By MS/MS	By MS/MS	By MS/MS	By MS/MS	By MS/MS	By MS/MS	By MS/MS	By matching	By matching	By matching	By MS/MS	By matching	By MS/MS	By MS/MS	78237000	4137700	6496400	13357000	1557100	5383200	3545800	6978900	3739300	9090600	3304500	5250700	2089200	253960	958960	3829700	357760	4427900	3478600
P18754	P18754	Regulator of chromosome condensation	RCC1	sp|P18754|RCC1_HUMAN Regulator of chromosome condensation OS=Homo sapiens OX=9606 GN=RCC1 PE=1 SV=1	By MS/MS	By MS/MS	By MS/MS	By MS/MS	By MS/MS	By matching	By MS/MS	By matching	By MS/MS	By matching	By MS/MS	By matching	By matching	By matching	By matching	By matching	By matching	By matching	77675000	7452700	9658600	5567800	5472100	4020300	3219000	13304000	1606900	5928500	1866800	13592000	2097400	654020	1149700	427870	206340	316290	1135000
P12956	P12956	X-ray repair cross-complementing protein 6	XRCC6	sp|P12956|XRCC6_HUMAN X-ray repair cross-complementing protein 6 OS=Homo sapiens OX=9606 GN=XRCC6 PE=1 SV=2	By MS/MS	By MS/MS	By MS/MS	By MS/MS	By MS/MS	By MS/MS	By MS/MS	By matching	By MS/MS	By MS/MS	By MS/MS	By matching	By MS/MS	By MS/MS	By MS/MS	By matching	By MS/MS	By MS/MS	77501000	8885400	6933600	7629500	3140400	5920700	1913300	8417700	2434400	6157100	2401800	5952600	1715200	1591100	3290500	3349700	1912300	2637400	3218200
P34897;P34896	P34897	Serine hydroxymethyltransferase, mitochondrial	SHMT2	sp|P34897|GLYM_HUMAN Serine hydroxymethyltransferase, mitochondrial OS=Homo sapiens OX=9606 GN=SHMT2 PE=1 SV=3	By MS/MS	By MS/MS	By MS/MS	By matching	By MS/MS	By matching	By MS/MS	By matching	By MS/MS	By MS/MS	By MS/MS	By matching	By matching	By MS/MS	By MS/MS	By matching	By MS/MS	By matching	77140000	9494900	4920400	7815000	2600700	5593700	1886300	6531100	1306600	6306000	3078000	3566500	1475600	616870	4813900	4168100	1589800	9226600	2150300
P62258	P62258	14-3-3 protein epsilon	YWHAE	sp|P62258|1433E_HUMAN 14-3-3 protein epsilon OS=Homo sapiens OX=9606 GN=YWHAE PE=1 SV=1	By MS/MS	By MS/MS	By MS/MS	By MS/MS	By MS/MS	By MS/MS	By MS/MS	By MS/MS	By MS/MS	By MS/MS	By MS/MS	By MS/MS	By MS/MS	By MS/MS	By MS/MS	By MS/MS	By MS/MS	By MS/MS	76256000	7792300	5531700	7853900	3099100	5557700	3088800	6487200	2740100	3407100	2429600	3527500	3288400	1515900	3428500	5923500	2088900	3481600	5014400
Q13247;Q08170	Q13247;Q08170	Serine/arginine-rich splicing factor 6;Serine/arginine-rich splicing factor 4	SRSF6;SRSF4	sp|Q13247|SRSF6_HUMAN Serine/arginine-rich splicing factor 6 OS=Homo sapiens OX=9606 GN=SRSF6 PE=1 SV=2;sp|Q08170|SRSF4_HUMAN Serine/arginine-rich splicing factor 4 OS=Homo sapiens OX=9606 GN=SRSF4 PE=1 SV=2	By MS/MS	By MS/MS	By MS/MS	By MS/MS	By matching	By MS/MS	By MS/MS	By MS/MS	By MS/MS	By MS/MS	By MS/MS	By MS/MS	By MS/MS	By MS/MS	By MS/MS	By MS/MS	By MS/MS	By MS/MS	76113000	3160000	3779400	4455900	5196200	1922800	5390000	5563300	3997300	2360400	3054900	7226200	5051500	3841800	3761200	4494100	2649400	4799200	5409800
Q75V66	Q75V66	Anoctamin-5	ANO5	sp|Q75V66|ANO5_HUMAN Anoctamin-5 OS=Homo sapiens OX=9606 GN=ANO5 PE=1 SV=1	By MS/MS	By MS/MS	By matching	By MS/MS	By matching	By MS/MS	By MS/MS	By MS/MS	By MS/MS	By MS/MS	By MS/MS	By MS/MS	By MS/MS	By MS/MS	By MS/MS	By MS/MS	By matching	By MS/MS	75691000	1673000	2713700	454440	4399600	242380	2106800	7311800	4816100	1297100	1933100	5315000	9089100	1486000	1862800	3536400	22177000	2630900	2645700
P62306	P62306	Small nuclear ribonucleoprotein F	SNRPF	sp|P62306|RUXF_HUMAN Small nuclear ribonucleoprotein F OS=Homo sapiens OX=9606 GN=SNRPF PE=1 SV=1	By matching	By matching	By MS/MS	None	By matching	By matching	None	None	By MS/MS	By matching	By MS/MS	By matching	By matching	None	By matching	None	None	By matching	75158000	5402900	7355700	5330500	0	5260700	8593500	0	0	5927400	3616800	8761700	4462600	6349900	0	7861200	0	0	6235500
P23246	P23246	Splicing factor, proline- and glutamine-rich	SFPQ	sp|P23246|SFPQ_HUMAN Splicing factor, proline- and glutamine-rich OS=Homo sapiens OX=9606 GN=SFPQ PE=1 SV=2	By MS/MS	By MS/MS	By MS/MS	By MS/MS	By MS/MS	By MS/MS	By MS/MS	By matching	By MS/MS	By matching	By matching	By matching	By matching	By matching	By matching	By matching	By matching	By matching	74815000	10458000	6386700	11196000	3428100	6985900	2086400	8211600	2692700	5650200	3037500	5115400	1540300	808710	1024100	1389300	892600	1894400	2017300
P21580	P21580	Tumor necrosis factor alpha-induced protein 3;A20p50;A20p37	TNFAIP3	sp|P21580|TNAP3_HUMAN Tumor necrosis factor alpha-induced protein 3 OS=Homo sapiens OX=9606 GN=TNFAIP3 PE=1 SV=1	By MS/MS	By MS/MS	By MS/MS	By MS/MS	By MS/MS	By matching	By MS/MS	By MS/MS	By MS/MS	By MS/MS	By MS/MS	By MS/MS	None	None	By MS/MS	By MS/MS	By matching	By MS/MS	72634000	4947000	7707900	3116900	3923800	3563300	4722400	5832500	2415800	7793500	2058700	7714800	3886800	0	0	2797500	5107500	3138500	3907500
Q12906;Q96SI9	Q12906	Interleukin enhancer-binding factor 3	ILF3	sp|Q12906|ILF3_HUMAN Interleukin enhancer-binding factor 3 OS=Homo sapiens OX=9606 GN=ILF3 PE=1 SV=3	By MS/MS	By MS/MS	By MS/MS	By MS/MS	By MS/MS	By matching	By MS/MS	By matching	By MS/MS	By matching	By MS/MS	By matching	By matching	By matching	By matching	By matching	By matching	By matching	71843000	9697900	10450000	8352500	5076300	5672300	2389900	9151000	1034000	6830900	1301100	7753600	526920	364460	772700	843710	158050	680100	787400
P56537	P56537	Eukaryotic translation initiation factor 6	EIF6	sp|P56537|IF6_HUMAN Eukaryotic translation initiation factor 6 OS=Homo sapiens OX=9606 GN=EIF6 PE=1 SV=1	By matching	By MS/MS	By MS/MS	By MS/MS	By MS/MS	By MS/MS	By MS/MS	By matching	By MS/MS	By matching	By MS/MS	By matching	By matching	By matching	By matching	By matching	By matching	By matching	71412000	5698700	7749200	1845500	4622300	1870200	4096100	9269000	2114700	5893400	1157900	8394500	2416400	2138600	2678200	3297000	2239600	3240200	2690000
P26641	P26641	Elongation factor 1-gamma	EEF1G	sp|P26641|EF1G_HUMAN Elongation factor 1-gamma OS=Homo sapiens OX=9606 GN=EEF1G PE=1 SV=3	By MS/MS	By MS/MS	By MS/MS	By MS/MS	By MS/MS	By MS/MS	By MS/MS	By MS/MS	By MS/MS	By MS/MS	By matching	By MS/MS	By MS/MS	By MS/MS	By MS/MS	By matching	By MS/MS	By MS/MS	71245000	3948200	2957800	3733400	2715300	2858300	3689000	2678300	3944400	3301400	4371200	2201200	4725600	2816300	5993300	6012900	3932800	5674700	5690600
P17844;Q92841;O15523;O00571	P17844	Probable ATP-dependent RNA helicase DDX5	DDX5	sp|P17844|DDX5_HUMAN Probable ATP-dependent RNA helicase DDX5 OS=Homo sapiens OX=9606 GN=DDX5 PE=1 SV=1	By MS/MS	By MS/MS	By MS/MS	By MS/MS	By MS/MS	By MS/MS	By MS/MS	By matching	By MS/MS	By matching	By MS/MS	By matching	By matching	By matching	By matching	By matching	By MS/MS	By matching	71063000	8850100	5568800	8285800	3038300	7166800	1857700	7669200	2056200	8937100	2030600	4394400	1183600	340410	1573000	1880000	814660	2994600	2422300
Q66PJ3	Q66PJ3	ADP-ribosylation factor-like protein 6-interacting protein 4	ARL6IP4	sp|Q66PJ3|AR6P4_HUMAN ADP-ribosylation factor-like protein 6-interacting protein 4 OS=Homo sapiens OX=9606 GN=ARL6IP4 PE=1 SV=3	By MS/MS	By MS/MS	By MS/MS	By MS/MS	By MS/MS	By MS/MS	By MS/MS	By MS/MS	By MS/MS	By MS/MS	By MS/MS	By MS/MS	By MS/MS	By MS/MS	By MS/MS	By MS/MS	By MS/MS	By MS/MS	70461000	5290300	5295400	2285800	2707400	2156900	4620400	5492200	3073600	6270500	2515900	7795200	3525100	2854200	2740600	4187100	3175800	3281800	3193000
O75964	O75964	ATP synthase subunit g, mitochondrial	ATP5MG	sp|O75964|ATP5L_HUMAN ATP synthase subunit g, mitochondrial OS=Homo sapiens OX=9606 GN=ATP5MG PE=1 SV=3	By matching	By matching	By matching	By matching	By MS/MS	By matching	By matching	By matching	By MS/MS	By matching	By matching	By matching	By matching	By matching	By matching	By matching	By matching	By matching	69296000	4372800	3574900	6958500	1094900	9888300	2770600	2910100	1490400	8689600	4547000	1469000	4199600	2359100	1799100	4177900	2195400	1567100	5231800
P48047	P48047	ATP synthase subunit O, mitochondrial	ATP5PO	sp|P48047|ATPO_HUMAN ATP synthase subunit O, mitochondrial OS=Homo sapiens OX=9606 GN=ATP5PO PE=1 SV=1	By MS/MS	By MS/MS	By MS/MS	By MS/MS	By MS/MS	By MS/MS	By MS/MS	By MS/MS	By MS/MS	By MS/MS	By MS/MS	By MS/MS	By MS/MS	By MS/MS	By MS/MS	By MS/MS	By MS/MS	By MS/MS	66584000	6358200	4178600	4950000	2694600	5345500	2345600	4983900	2305200	4326700	2380300	3852600	3352800	896330	3942300	5657700	1911100	4329100	2773000
Q9H7B2	Q9H7B2	Ribosome production factor 2 homolog	RPF2	sp|Q9H7B2|RPF2_HUMAN Ribosome production factor 2 homolog OS=Homo sapiens OX=9606 GN=RPF2 PE=1 SV=2	By MS/MS	By MS/MS	By MS/MS	By MS/MS	By MS/MS	By MS/MS	By MS/MS	By MS/MS	By MS/MS	By MS/MS	By MS/MS	By matching	By matching	By matching	By matching	By matching	By matching	By matching	66319000	5941600	9247400	3019000	5251700	2034700	3801400	12123000	3032500	2573900	1389600	11354000	2188400	1421800	722630	776140	285990	1846400	1156000
P68371;P04350;Q3ZCM7	P68371;P04350	Tubulin beta-4B chain;Tubulin beta-4A chain	TUBB4B;TUBB4A	sp|P68371|TBB4B_HUMAN Tubulin beta-4B chain OS=Homo sapiens OX=9606 GN=TUBB4B PE=1 SV=1;sp|P04350|TBB4A_HUMAN Tubulin beta-4A chain OS=Homo sapiens OX=9606 GN=TUBB4A PE=1 SV=2	By MS/MS	By matching	By MS/MS	By MS/MS	By MS/MS	By matching	By matching	By MS/MS	By MS/MS	By MS/MS	By MS/MS	By MS/MS	By matching	By MS/MS	By MS/MS	By MS/MS	By MS/MS	By MS/MS	65960000	9985800	1539200	4112300	2965100	3089400	3148300	2990700	2318800	3372500	2591500	1693200	3210400	0	5563000	4181700	2472300	8484300	4241400
Q9BYG3	Q9BYG3	MKI67 FHA domain-interacting nucleolar phosphoprotein	NIFK	sp|Q9BYG3|MK67I_HUMAN MKI67 FHA domain-interacting nucleolar phosphoprotein OS=Homo sapiens OX=9606 GN=NIFK PE=1 SV=1	By matching	By MS/MS	By matching	By matching	By matching	By matching	By MS/MS	By matching	By matching	By matching	By MS/MS	By matching	By matching	By matching	None	None	By matching	By matching	65834000	5935400	6446400	3892000	5165500	4094500	2249200	8453000	1961200	5518000	1409300	13398000	3131100	457410	1320700	0	0	686650	1715100
Q96AG4	Q96AG4	Leucine-rich repeat-containing protein 59;Leucine-rich repeat-containing protein 59, N-terminally processed	LRRC59	sp|Q96AG4|LRC59_HUMAN Leucine-rich repeat-containing protein 59 OS=Homo sapiens OX=9606 GN=LRRC59 PE=1 SV=1	By MS/MS	By MS/MS	By MS/MS	By matching	By MS/MS	By matching	By MS/MS	By MS/MS	By MS/MS	By MS/MS	By MS/MS	By matching	By matching	By matching	By matching	By matching	By matching	By matching	65787000	6920300	2683700	6025500	3285800	4670400	2520500	9236500	2653100	6860700	2175400	5650000	2166900	831620	2445000	881130	1540300	2846400	2394100
P04899;P11488;P63096;P19087;P08754;A8MTJ3;P09471;P38405;P63092	P04899;P11488;P63096;P19087;P08754;A8MTJ3	Guanine nucleotide-binding protein G(i) subunit alpha-2;Guanine nucleotide-binding protein G(t) subunit alpha-1;Guanine nucleotide-binding protein G(i) subunit alpha-1;Guanine nucleotide-binding protein G(t) subunit alpha-2;Guanine nucleotide-binding protein G(i) subunit alpha-3;Guanine nucleotide-binding protein G(t) subunit alpha-3	GNAI2;GNAT1;GNAI1;GNAT2;GNAI3;GNAT3	sp|P04899|GNAI2_HUMAN Guanine nucleotide-binding protein G(i) subunit alpha-2 OS=Homo sapiens OX=9606 GN=GNAI2 PE=1 SV=3;sp|P11488|GNAT1_HUMAN Guanine nucleotide-binding protein G(t) subunit alpha-1 OS=Homo sapiens OX=9606 GN=GNAT1 PE=1 SV=5;sp|P63096|GNAI	By MS/MS	By matching	By MS/MS	By MS/MS	By MS/MS	By MS/MS	By MS/MS	By MS/MS	By matching	By MS/MS	By MS/MS	By MS/MS	By matching	By MS/MS	By MS/MS	By MS/MS	By MS/MS	By MS/MS	65496000	10847000	5648200	4906600	2003900	3602200	1464100	3828700	1888100	4261700	2741300	3229100	3314900	1285400	3316100	3574800	1668200	5476500	2438700
P04843	P04843	Dolichyl-diphosphooligosaccharide--protein glycosyltransferase subunit 1	RPN1	sp|P04843|RPN1_HUMAN Dolichyl-diphosphooligosaccharide--protein glycosyltransferase subunit 1 OS=Homo sapiens OX=9606 GN=RPN1 PE=1 SV=1	By MS/MS	By MS/MS	By MS/MS	By MS/MS	By MS/MS	By MS/MS	By MS/MS	By MS/MS	By MS/MS	By MS/MS	By MS/MS	By MS/MS	By MS/MS	By MS/MS	By MS/MS	By MS/MS	By MS/MS	By MS/MS	65366000	7738600	4931400	5666200	2234200	4538400	2599400	4955300	2945800	4584300	3118900	3206900	2515900	1019400	2430800	5772600	1443700	2949900	2714400
P08865;A0A8I5KQE6	P08865;A0A8I5KQE6	Small ribosomal subunit protein uS2;Small ribosomal subunit protein uS2B	RPSA;RPSA2	sp|P08865|RSSA_HUMAN Small ribosomal subunit protein uS2 OS=Homo sapiens OX=9606 GN=RPSA PE=1 SV=4;sp|A0A8I5KQE6|RPSA2_HUMAN Small ribosomal subunit protein uS2B OS=Homo sapiens OX=9606 GN=RPSA2 PE=1 SV=1	By MS/MS	By MS/MS	By MS/MS	By MS/MS	By MS/MS	By MS/MS	By MS/MS	By MS/MS	By MS/MS	By matching	By matching	By matching	By matching	By MS/MS	By MS/MS	By matching	By MS/MS	By MS/MS	65296000	8452300	3222300	6122500	3521700	4760800	2820300	6952600	2641700	3646900	2592900	1419600	2215300	1005900	4521600	2850700	1472600	4795800	2280800
Q9Y265	Q9Y265	RuvB-like 1	RUVBL1	sp|Q9Y265|RUVB1_HUMAN RuvB-like 1 OS=Homo sapiens OX=9606 GN=RUVBL1 PE=1 SV=1	By MS/MS	By MS/MS	By MS/MS	By matching	By MS/MS	By MS/MS	By MS/MS	By matching	By MS/MS	By matching	By MS/MS	By matching	By matching	By matching	By MS/MS	By MS/MS	By MS/MS	By MS/MS	63977000	4726000	5152200	2697900	2267200	2389900	3881100	5952200	2160000	4830500	2440400	5866800	3034400	2057000	3435600	3490100	3029500	2677400	3889300
P11279	P11279	Lysosome-associated membrane glycoprotein 1	LAMP1	sp|P11279|LAMP1_HUMAN Lysosome-associated membrane glycoprotein 1 OS=Homo sapiens OX=9606 GN=LAMP1 PE=1 SV=3	By MS/MS	By matching	By MS/MS	By matching	By MS/MS	By matching	By MS/MS	By MS/MS	By MS/MS	By MS/MS	By MS/MS	By MS/MS	By MS/MS	By MS/MS	By matching	By matching	By MS/MS	By matching	63330000	6944400	5276900	5769000	2341600	4331800	2070000	6273700	3142200	3560600	2354500	5906100	2965900	1315000	3017800	3713300	839250	2379100	1129200
O00330	O00330	Pyruvate dehydrogenase protein X component, mitochondrial	PDHX	sp|O00330|ODPX_HUMAN Pyruvate dehydrogenase protein X component, mitochondrial OS=Homo sapiens OX=9606 GN=PDHX PE=1 SV=3	By MS/MS	By MS/MS	By matching	By matching	By matching	By MS/MS	By matching	By MS/MS	By MS/MS	By matching	By MS/MS	By MS/MS	By MS/MS	By MS/MS	By MS/MS	By MS/MS	By MS/MS	By MS/MS	62329000	3445600	3613200	1534700	2350500	2057100	3471500	3420900	2748900	2481500	1570500	4018200	4671600	3366800	5250900	5696300	5413800	2920600	4296400
Q9NVP1	Q9NVP1	ATP-dependent RNA helicase DDX18	DDX18	sp|Q9NVP1|DDX18_HUMAN ATP-dependent RNA helicase DDX18 OS=Homo sapiens OX=9606 GN=DDX18 PE=1 SV=2	By MS/MS	By MS/MS	By MS/MS	By MS/MS	By MS/MS	By MS/MS	By MS/MS	By MS/MS	By MS/MS	By MS/MS	By MS/MS	By MS/MS	By MS/MS	By matching	By MS/MS	By MS/MS	By MS/MS	By MS/MS	61547000	6446500	5849900	2296500	3642800	2943800	3212800	10489000	2271700	7691200	1490600	8610700	2365000	1270300	327420	1128500	651350	616630	568990
Q5JWF2	Q5JWF2	Guanine nucleotide-binding protein G(s) subunit alpha isoforms XLas	GNAS	sp|Q5JWF2|GNAS1_HUMAN Guanine nucleotide-binding protein G(s) subunit alpha isoforms XLas OS=Homo sapiens OX=9606 GN=GNAS PE=1 SV=2	By MS/MS	By MS/MS	By MS/MS	By MS/MS	By MS/MS	By MS/MS	By MS/MS	By MS/MS	By MS/MS	By MS/MS	By MS/MS	By MS/MS	By MS/MS	By MS/MS	By MS/MS	By MS/MS	By MS/MS	By MS/MS	60520000	5514000	4804200	1382700	2413500	1152900	3997100	7019800	2046800	3043900	1440500	8462300	5189100	1212200	2013000	3197200	2396900	2499400	2734900
P61009	P61009	Signal peptidase complex subunit 3	SPCS3	sp|P61009|SPCS3_HUMAN Signal peptidase complex subunit 3 OS=Homo sapiens OX=9606 GN=SPCS3 PE=1 SV=1	By matching	By matching	By MS/MS	By matching	By matching	By matching	By matching	By MS/MS	By matching	By matching	By matching	By matching	By matching	By matching	By matching	None	None	By matching	60163000	5669900	3413300	7801400	2665400	4839500	2220000	2481400	3092200	7224200	3878800	2501300	3391700	1147800	3185000	2737800	0	0	3913500
P39656	P39656	Dolichyl-diphosphooligosaccharide--protein glycosyltransferase 48 kDa subunit	DDOST	sp|P39656|OST48_HUMAN Dolichyl-diphosphooligosaccharide--protein glycosyltransferase 48 kDa subunit OS=Homo sapiens OX=9606 GN=DDOST PE=1 SV=4	By MS/MS	By MS/MS	By MS/MS	By MS/MS	By MS/MS	By MS/MS	By MS/MS	By MS/MS	By MS/MS	By MS/MS	By matching	By MS/MS	By matching	By MS/MS	By MS/MS	By MS/MS	By MS/MS	By matching	59632000	5100300	4102000	4762700	2230200	5814600	1623500	5624400	2267000	4900500	3219100	2482500	2604300	1219400	1979600	5443500	1871000	2237900	2149700
P60842;Q14240	P60842;Q14240	Eukaryotic initiation factor 4A-I;Eukaryotic initiation factor 4A-II	EIF4A1;EIF4A2	sp|P60842|IF4A1_HUMAN Eukaryotic initiation factor 4A-I OS=Homo sapiens OX=9606 GN=EIF4A1 PE=1 SV=1;sp|Q14240|IF4A2_HUMAN Eukaryotic initiation factor 4A-II OS=Homo sapiens OX=9606 GN=EIF4A2 PE=1 SV=2	By MS/MS	By MS/MS	By MS/MS	By MS/MS	By MS/MS	By MS/MS	By MS/MS	By matching	By MS/MS	By matching	By MS/MS	By matching	By matching	By MS/MS	By MS/MS	By matching	By MS/MS	By MS/MS	59443000	7573200	4903200	6410100	3484000	2728300	2436000	3709600	516920	2617500	1685800	2359500	3628000	668740	4491900	3241900	1380300	5238900	2369600
P21926	P21926	CD9 antigen	CD9	sp|P21926|CD9_HUMAN CD9 antigen OS=Homo sapiens OX=9606 GN=CD9 PE=1 SV=4	By MS/MS	By matching	By MS/MS	By matching	By MS/MS	By matching	By matching	By MS/MS	By MS/MS	By MS/MS	By matching	By matching	By matching	By matching	By matching	By matching	By matching	By matching	58186000	5801200	3715200	6475600	2946900	3122200	2114500	4660900	2950500	3793300	3221300	2897700	2475100	658580	2088800	4620500	1035800	2552400	3055400
Q99623	Q99623	Prohibitin-2	PHB2	sp|Q99623|PHB2_HUMAN Prohibitin-2 OS=Homo sapiens OX=9606 GN=PHB2 PE=1 SV=2	By MS/MS	By MS/MS	By MS/MS	By MS/MS	By MS/MS	By matching	By MS/MS	By MS/MS	By MS/MS	By MS/MS	By matching	By MS/MS	By matching	By MS/MS	By MS/MS	By MS/MS	By MS/MS	By MS/MS	57939000	6177000	3675800	6457700	3151100	4365400	988100	5179000	1578200	5638000	2834400	1565000	1292000	558720	2434600	4943800	459720	4509200	2131500
Q13601	Q13601	KRR1 small subunit processome component homolog	KRR1	sp|Q13601|KRR1_HUMAN KRR1 small subunit processome component homolog OS=Homo sapiens OX=9606 GN=KRR1 PE=1 SV=4	By MS/MS	By MS/MS	By MS/MS	By MS/MS	By MS/MS	By MS/MS	By MS/MS	By MS/MS	By MS/MS	By MS/MS	By MS/MS	By MS/MS	By matching	By matching	None	None	None	By matching	57803000	3887700	6796000	1576900	2834800	232890	1681300	12753000	1023500	5085900	785400	17636000	1800000	245860	661080	0	0	0	803470
P30044	P30044	Peroxiredoxin-5, mitochondrial	PRDX5	sp|P30044|PRDX5_HUMAN Peroxiredoxin-5, mitochondrial OS=Homo sapiens OX=9606 GN=PRDX5 PE=1 SV=4	By MS/MS	By MS/MS	By MS/MS	By MS/MS	By MS/MS	By matching	By MS/MS	By matching	By MS/MS	By MS/MS	By MS/MS	By matching	By matching	By matching	By matching	By matching	By MS/MS	By matching	57768000	7867600	3752100	4665300	2175100	4289600	2447700	4653600	1211900	4836100	1511200	4721900	2365200	750590	1186100	4429100	983290	3617600	2303700
P05556	P05556	Integrin beta-1	ITGB1	sp|P05556|ITB1_HUMAN Integrin beta-1 OS=Homo sapiens OX=9606 GN=ITGB1 PE=1 SV=2	By MS/MS	By MS/MS	By MS/MS	By MS/MS	By MS/MS	By MS/MS	By MS/MS	By MS/MS	By MS/MS	By MS/MS	By MS/MS	By MS/MS	By matching	By MS/MS	By MS/MS	By MS/MS	By matching	By matching	57529000	6741500	4341200	5536400	2149300	4205700	1767000	5823400	2390900	5827700	2709100	4991200	1991000	719470	1946900	2071900	475770	1429900	2410900
Q14919	Q14919	Dr1-associated corepressor	DRAP1	sp|Q14919|NC2A_HUMAN Dr1-associated corepressor OS=Homo sapiens OX=9606 GN=DRAP1 PE=1 SV=3	By MS/MS	By matching	By matching	By MS/MS	By matching	By MS/MS	By MS/MS	By MS/MS	By MS/MS	By MS/MS	By matching	By MS/MS	By matching	By MS/MS	By MS/MS	By MS/MS	By matching	By MS/MS	57394000	2123200	1633200	1112200	1678000	1179500	3536000	2936600	1965700	1992000	1977900	2756300	3705100	2903900	4978900	8531100	3723000	4791600	5869900
Q99878;Q96KK5;Q9BTM1;Q16777;Q6FI13;P20671;P0C0S8	Q99878;Q96KK5;Q9BTM1;Q16777;Q6FI13;P20671;P0C0S8	Histone H2A type 1-J;Histone H2A type 1-H;Histone H2A.J;Histone H2A type 2-C;Histone H2A type 2-A;Histone H2A type 1-D;Histone H2A type 1	H2AC14;H2AC12;H2AJ;H2AC20;H2AC18;H2AC7;H2AC11	sp|Q99878|H2A1J_HUMAN Histone H2A type 1-J OS=Homo sapiens OX=9606 GN=H2AC14 PE=1 SV=3;sp|Q96KK5|H2A1H_HUMAN Histone H2A type 1-H OS=Homo sapiens OX=9606 GN=H2AC12 PE=1 SV=3;sp|Q9BTM1|H2AJ_HUMAN Histone H2A.J OS=Homo sapiens OX=9606 GN=H2AJ PE=1 SV=1;sp|Q1	By matching	By matching	By MS/MS	By MS/MS	By matching	By MS/MS	By MS/MS	By matching	By matching	By matching	By matching	By matching	By matching	By MS/MS	By matching	By matching	By MS/MS	By MS/MS	57211000	0	6979700	3692000	5751400	2178200	5485100	11720000	0	0	2229800	1832400	1724400	1277900	8324000	0	0	6016500	0
O75396	O75396	Vesicle-trafficking protein SEC22b	SEC22B	sp|O75396|SC22B_HUMAN Vesicle-trafficking protein SEC22b OS=Homo sapiens OX=9606 GN=SEC22B PE=1 SV=5	By MS/MS	By matching	By MS/MS	By matching	By MS/MS	By MS/MS	By matching	By matching	By MS/MS	By matching	By matching	By matching	None	By matching	By matching	By matching	By matching	By matching	56626000	8181600	4548100	5742400	275420	5059100	2688600	5603000	1251000	5014300	3381700	4364500	281270	0	1142800	4111800	683330	3322900	974950
P16070	P16070	CD44 antigen	CD44	sp|P16070|CD44_HUMAN CD44 antigen OS=Homo sapiens OX=9606 GN=CD44 PE=1 SV=3	By MS/MS	By MS/MS	By MS/MS	By MS/MS	By MS/MS	By MS/MS	By MS/MS	By MS/MS	By MS/MS	By MS/MS	By MS/MS	By MS/MS	By MS/MS	By MS/MS	By MS/MS	By MS/MS	By MS/MS	By MS/MS	56507000	3857400	3592400	3452200	2395500	2226000	1209400	5204000	1511400	2880700	2423800	3762900	2267100	2176000	4434400	5837700	2616700	3584900	3074500
P05976;P08590	P05976;P08590	Myosin light chain 1/3, skeletal muscle isoform;Myosin light chain 3	MYL1;MYL3	sp|P05976|MYL1_HUMAN Myosin light chain 1/3, skeletal muscle isoform OS=Homo sapiens OX=9606 GN=MYL1 PE=1 SV=3;sp|P08590|MYL3_HUMAN Myosin light chain 3 OS=Homo sapiens OX=9606 GN=MYL3 PE=1 SV=3	By matching	By MS/MS	By MS/MS	By MS/MS	By matching	By matching	By matching	By MS/MS	By MS/MS	By MS/MS	By MS/MS	By MS/MS	By MS/MS	By MS/MS	By MS/MS	By MS/MS	By MS/MS	By MS/MS	56318000	2608000	0	5095200	2672400	1304300	1002700	2019800	3634500	3231100	3121400	11468000	4864000	1698900	1858800	2989400	1740000	2362900	4646200
P18085;P84085;P84077;P61204	P18085	ADP-ribosylation factor 4	ARF4	sp|P18085|ARF4_HUMAN ADP-ribosylation factor 4 OS=Homo sapiens OX=9606 GN=ARF4 PE=1 SV=3	By MS/MS	By MS/MS	By MS/MS	By MS/MS	By MS/MS	By MS/MS	By matching	By MS/MS	By matching	By MS/MS	By matching	By matching	By matching	By matching	By MS/MS	None	By MS/MS	By matching	56318000	17673000	0	4807000	573780	4219000	3815600	1150800	2010800	5477100	2598900	2397700	3348700	226420	843030	1188700	0	5098300	889130
P17066;P48741	P17066	Heat shock 70 kDa protein 6	HSPA6	sp|P17066|HSP76_HUMAN Heat shock 70 kDa protein 6 OS=Homo sapiens OX=9606 GN=HSPA6 PE=1 SV=2	By MS/MS	By MS/MS	By MS/MS	By MS/MS	By MS/MS	By MS/MS	By MS/MS	By MS/MS	By MS/MS	By MS/MS	By MS/MS	By MS/MS	By MS/MS	By MS/MS	By MS/MS	By MS/MS	By MS/MS	By MS/MS	56106000	7306300	5299800	5672900	2247200	3216300	2124200	4645000	2300200	2018700	2201700	3934600	2120000	1147700	2261500	3314100	1401100	2718800	2176100
P00387	P00387	NADH-cytochrome b5 reductase 3	CYB5R3	sp|P00387|NB5R3_HUMAN NADH-cytochrome b5 reductase 3 OS=Homo sapiens OX=9606 GN=CYB5R3 PE=1 SV=3	By MS/MS	By matching	By MS/MS	By matching	By MS/MS	By matching	By matching	By matching	By MS/MS	By matching	By matching	By matching	By matching	By matching	By matching	By matching	By matching	By matching	54263000	11783000	3585900	5441700	2227300	5948900	1609700	5075300	651010	6031200	1874600	2076200	1002400	191710	846540	1144600	1216400	3741300	1891000
Q9NQC3	Q9NQC3	Reticulon-4	RTN4	sp|Q9NQC3|RTN4_HUMAN Reticulon-4 OS=Homo sapiens OX=9606 GN=RTN4 PE=1 SV=2	By MS/MS	By MS/MS	By MS/MS	By MS/MS	By MS/MS	By MS/MS	By MS/MS	By MS/MS	By MS/MS	By MS/MS	By MS/MS	By MS/MS	By MS/MS	By MS/MS	By MS/MS	By MS/MS	By MS/MS	By MS/MS	53758000	7032300	3343000	4310700	1745200	3964700	2130500	4815300	3281900	3642000	2955700	1796600	1958700	1102600	2259400	2185800	2054100	2925700	2254300
P09661	P09661	U2 small nuclear ribonucleoprotein A	SNRPA1	sp|P09661|RU2A_HUMAN U2 small nuclear ribonucleoprotein A OS=Homo sapiens OX=9606 GN=SNRPA1 PE=1 SV=2	By MS/MS	By MS/MS	By matching	By MS/MS	By MS/MS	By matching	By MS/MS	By matching	By MS/MS	By matching	By MS/MS	By matching	By matching	By matching	By matching	By matching	By matching	By matching	53210000	6679700	4929600	3827000	4807300	2065100	4329800	5662200	643670	4448600	1029200	6852300	580290	709460	893830	2454200	457960	1110000	1729300
P06753	P06753	Tropomyosin alpha-3 chain	TPM3	sp|P06753|TPM3_HUMAN Tropomyosin alpha-3 chain OS=Homo sapiens OX=9606 GN=TPM3 PE=1 SV=2	By MS/MS	By MS/MS	By MS/MS	By MS/MS	By MS/MS	By matching	By MS/MS	By matching	By MS/MS	By MS/MS	By MS/MS	By matching	By matching	By matching	By matching	By matching	By MS/MS	By matching	53198000	5379500	3147900	6627500	3272800	2554200	2011300	6306200	1393100	3643200	1612000	3472900	2073300	1176500	1084000	2225300	2228900	3183600	1806200
Q14697	Q14697	Neutral alpha-glucosidase AB	GANAB	sp|Q14697|GANAB_HUMAN Neutral alpha-glucosidase AB OS=Homo sapiens OX=9606 GN=GANAB PE=1 SV=3	By MS/MS	By MS/MS	By MS/MS	By MS/MS	By MS/MS	By MS/MS	By MS/MS	By MS/MS	By MS/MS	By MS/MS	By MS/MS	By MS/MS	By matching	By MS/MS	By MS/MS	By MS/MS	By MS/MS	By MS/MS	52688000	6672600	2562300	5722200	1531600	2938600	1123900	4348200	864050	5623900	2517500	1536400	2375600	1188500	2941300	3136500	802670	4032900	2769400
Q9Y3B9	Q9Y3B9	RRP15-like protein	RRP15	sp|Q9Y3B9|RRP15_HUMAN RRP15-like protein OS=Homo sapiens OX=9606 GN=RRP15 PE=1 SV=2	By MS/MS	By MS/MS	By matching	By MS/MS	By matching	None	None	By matching	By MS/MS	By MS/MS	By MS/MS	By matching	By MS/MS	None	None	By matching	By matching	By MS/MS	52407000	4221700	5179000	588250	6592200	451600	0	0	1600500	9577600	1665200	14238000	1632700	1198300	0	0	907370	1293000	3261300
P35613	P35613	Basigin	BSG	sp|P35613|BASI_HUMAN Basigin OS=Homo sapiens OX=9606 GN=BSG PE=1 SV=2	By MS/MS	By MS/MS	By MS/MS	By matching	By MS/MS	By matching	By matching	By MS/MS	By MS/MS	By MS/MS	By matching	By matching	None	By matching	By matching	By matching	By matching	By matching	52291000	6169900	4384300	5624500	2099400	2071200	2069500	5545000	1490300	6029000	2869800	1790800	1411200	0	1521900	3810200	815350	2039900	2548900
Q04941	Q04941	Proteolipid protein 2	PLP2	sp|Q04941|PLP2_HUMAN Proteolipid protein 2 OS=Homo sapiens OX=9606 GN=PLP2 PE=1 SV=1	By MS/MS	By MS/MS	By MS/MS	By MS/MS	By MS/MS	None	By MS/MS	By MS/MS	By MS/MS	By MS/MS	By MS/MS	By MS/MS	By matching	By MS/MS	By MS/MS	By matching	By MS/MS	By MS/MS	52113000	6603800	4352200	4488600	1951000	2680400	0	4406800	2585000	3036500	2463800	4134600	2750800	1108800	2318600	3422300	1317900	2156000	2335900
P61224;P62834;A6NIZ1	P61224;P62834;A6NIZ1	Ras-related protein Rap-1b;Ras-related protein Rap-1A;Ras-related protein Rap-1b-like protein	RAP1B;RAP1A;RAP1BL	sp|P61224|RAP1B_HUMAN Ras-related protein Rap-1b OS=Homo sapiens OX=9606 GN=RAP1B PE=1 SV=1;sp|P62834|RAP1A_HUMAN Ras-related protein Rap-1A OS=Homo sapiens OX=9606 GN=RAP1A PE=1 SV=1;sp|A6NIZ1|RP1BL_HUMAN Ras-related protein Rap-1b-like protein OS=Homo sa	By MS/MS	By MS/MS	By MS/MS	By matching	By MS/MS	By matching	By MS/MS	By matching	By MS/MS	By MS/MS	By matching	By matching	By matching	By matching	By matching	By matching	By MS/MS	By matching	51233000	7543200	4287500	4595800	2626100	4267700	2111800	4839000	1555900	4219600	2034400	2245400	2073800	349620	1957500	1698900	1144000	1292200	2391000
O43175	O43175	D-3-phosphoglycerate dehydrogenase	PHGDH	sp|O43175|SERA_HUMAN D-3-phosphoglycerate dehydrogenase OS=Homo sapiens OX=9606 GN=PHGDH PE=1 SV=4	By MS/MS	By matching	By MS/MS	By MS/MS	By MS/MS	By matching	By matching	By matching	By MS/MS	By matching	By matching	By matching	By matching	By MS/MS	By MS/MS	By matching	By MS/MS	By MS/MS	49750000	7350700	2900600	4109500	1964000	2786900	2165000	3464500	1303400	2873000	1333500	1917700	1792600	690490	2697200	3288900	1467200	4680400	2964200
Q9UQ35	Q9UQ35	Serine/arginine repetitive matrix protein 2	SRRM2	sp|Q9UQ35|SRRM2_HUMAN Serine/arginine repetitive matrix protein 2 OS=Homo sapiens OX=9606 GN=SRRM2 PE=1 SV=2	By MS/MS	By MS/MS	By MS/MS	By MS/MS	By MS/MS	By MS/MS	By MS/MS	By MS/MS	By MS/MS	By MS/MS	By MS/MS	By MS/MS	By MS/MS	By MS/MS	By MS/MS	By MS/MS	By MS/MS	By MS/MS	49417000	3518900	4168100	1553000	3617100	1475800	4056500	5529600	1767300	3356000	1418800	5056800	1920900	1906600	1942300	2350900	1824000	1709500	2244700
P78371	P78371	T-complex protein 1 subunit beta	CCT2	sp|P78371|TCPB_HUMAN T-complex protein 1 subunit beta OS=Homo sapiens OX=9606 GN=CCT2 PE=1 SV=4	By MS/MS	By MS/MS	By MS/MS	By MS/MS	By MS/MS	By MS/MS	By MS/MS	By MS/MS	By MS/MS	By MS/MS	By MS/MS	By MS/MS	By MS/MS	By MS/MS	By MS/MS	By MS/MS	By MS/MS	By MS/MS	48954000	4982800	2571400	2901000	1443700	2813000	2288300	3500700	1345100	3079800	1307400	3026900	2734200	1335100	2826400	4795800	2044700	3192900	2765200
Q99729	Q99729	Heterogeneous nuclear ribonucleoprotein A/B	HNRNPAB	sp|Q99729|ROAA_HUMAN Heterogeneous nuclear ribonucleoprotein A/B OS=Homo sapiens OX=9606 GN=HNRNPAB PE=1 SV=2	By MS/MS	By MS/MS	By MS/MS	By matching	By MS/MS	By matching	By matching	None	By MS/MS	By MS/MS	By matching	By matching	None	None	None	None	None	By matching	47164000	4181700	4692200	5604700	2899400	5044400	1900700	5635900	0	8868200	1060200	5756400	588400	0	0	0	0	0	931710
Q00325	Q00325	Solute carrier family 25 member 3	SLC25A3	sp|Q00325|S25A3_HUMAN Solute carrier family 25 member 3 OS=Homo sapiens OX=9606 GN=SLC25A3 PE=1 SV=2	By MS/MS	By MS/MS	By MS/MS	By matching	By MS/MS	By matching	By matching	By matching	By MS/MS	By MS/MS	None	By matching	By matching	By matching	By MS/MS	By matching	By MS/MS	By matching	46856000	5509600	2377900	5528800	2152000	4540200	673420	3701000	1666300	3630300	2380500	0	1760700	275370	2071900	4112800	846600	3567900	2061100
Q15233	Q15233	Non-POU domain-containing octamer-binding protein	NONO	sp|Q15233|NONO_HUMAN Non-POU domain-containing octamer-binding protein OS=Homo sapiens OX=9606 GN=NONO PE=1 SV=4	By MS/MS	By MS/MS	By MS/MS	By MS/MS	By MS/MS	By MS/MS	By MS/MS	By MS/MS	By MS/MS	By MS/MS	By MS/MS	By matching	By matching	By matching	By matching	By matching	By MS/MS	By matching	46006000	7100800	4376600	4439700	2479200	4257800	1899800	5756100	731400	6031100	1830100	3061000	521780	309680	459280	837100	0	807580	1107400
P63244	P63244	Small ribosomal subunit protein RACK1;Small ribosomal subunit protein RACK1, N-terminally processed	RACK1	sp|P63244|RACK1_HUMAN Small ribosomal subunit protein RACK1 OS=Homo sapiens OX=9606 GN=RACK1 PE=1 SV=3	By MS/MS	By matching	By MS/MS	By matching	By MS/MS	By MS/MS	By MS/MS	By matching	By MS/MS	By MS/MS	By matching	By MS/MS	By matching	By MS/MS	By MS/MS	By matching	By MS/MS	By matching	45354000	7081700	2102600	3906900	1727000	4465800	1419100	4187200	664900	5346600	1292300	1649100	1531700	352910	1396500	2855100	460710	3080100	1834000
Q9NYL9	Q9NYL9	Tropomodulin-3	TMOD3	sp|Q9NYL9|TMOD3_HUMAN Tropomodulin-3 OS=Homo sapiens OX=9606 GN=TMOD3 PE=1 SV=1	By MS/MS	By MS/MS	By MS/MS	By MS/MS	By matching	By MS/MS	By MS/MS	By matching	By MS/MS	By matching	By MS/MS	None	By matching	By MS/MS	By MS/MS	By MS/MS	By matching	By matching	45209000	2642500	3300000	1567600	2054800	918610	1856600	3957000	2730000	2636200	2218700	9009800	0	1479000	2126900	3377800	2238400	1681800	1413200
P37802	P37802	Transgelin-2	TAGLN2	sp|P37802|TAGL2_HUMAN Transgelin-2 OS=Homo sapiens OX=9606 GN=TAGLN2 PE=1 SV=3	By MS/MS	By matching	By MS/MS	By matching	By MS/MS	By matching	By matching	By matching	By matching	By matching	By matching	By matching	By matching	By matching	By matching	By matching	By MS/MS	By matching	45083000	5699800	2987400	5111700	1161900	3594800	2059300	4031400	2221900	1692900	1834400	1084300	1682200	670880	880750	3310200	849730	3194100	3014800
P0DMV9;P0DMV8	P0DMV9;P0DMV8	Heat shock 70 kDa protein 1B;Heat shock 70 kDa protein 1A	HSPA1B;HSPA1A	sp|P0DMV9|HS71B_HUMAN Heat shock 70 kDa protein 1B OS=Homo sapiens OX=9606 GN=HSPA1B PE=1 SV=1;sp|P0DMV8|HS71A_HUMAN Heat shock 70 kDa protein 1A OS=Homo sapiens OX=9606 GN=HSPA1A PE=1 SV=1	By MS/MS	By MS/MS	By MS/MS	By matching	By MS/MS	By matching	By matching	By matching	By MS/MS	By MS/MS	By matching	By matching	By matching	By matching	By matching	By matching	By matching	By matching	44621000	5008500	2558800	5226200	2126900	3115800	1240100	3553200	1103900	3601600	1306100	3195800	1922500	319260	1349400	2087700	792740	2450100	3662900
P49755	P49755	Transmembrane emp24 domain-containing protein 10	TMED10	sp|P49755|TMEDA_HUMAN Transmembrane emp24 domain-containing protein 10 OS=Homo sapiens OX=9606 GN=TMED10 PE=1 SV=2	By MS/MS	By MS/MS	By MS/MS	By matching	By MS/MS	By matching	By MS/MS	By MS/MS	By MS/MS	By MS/MS	By matching	By matching	By MS/MS	By matching	By MS/MS	By matching	By matching	By matching	44359000	3464600	2549200	4087700	1631700	2462500	1901900	3661200	2449400	4094200	2838100	1843100	2016100	786220	1408700	3593100	759810	1946800	2865000
P16104	P16104	Histone H2AX	H2AX	sp|P16104|H2AX_HUMAN Histone H2AX OS=Homo sapiens OX=9606 GN=H2AX PE=1 SV=2	By matching	By MS/MS	By matching	By MS/MS	By matching	By MS/MS	By MS/MS	By MS/MS	By matching	By matching	By MS/MS	By MS/MS	By MS/MS	By MS/MS	By MS/MS	By MS/MS	By MS/MS	By MS/MS	44108000	1211500	2174000	317430	1560500	249640	1727300	5726000	3623200	0	546360	5037700	4886300	4106400	1745900	2878400	3569900	3543000	1204400
P62072	P62072	Mitochondrial import inner membrane translocase subunit Tim10	TIMM10	sp|P62072|TIM10_HUMAN Mitochondrial import inner membrane translocase subunit Tim10 OS=Homo sapiens OX=9606 GN=TIMM10 PE=1 SV=1	By matching	By matching	None	By matching	By matching	By matching	By matching	By matching	By matching	By matching	By matching	By MS/MS	By MS/MS	By matching	By MS/MS	By matching	By matching	By matching	43934000	1975800	1640600	0	1251900	1217700	2061100	1700100	1966200	2425000	1573000	4027000	4146900	1537400	4212700	6847400	1873300	1909500	3568900
P40939	P40939	Trifunctional enzyme subunit alpha, mitochondrial;Long-chain enoyl-CoA hydratase;Long chain 3-hydroxyacyl-CoA dehydrogenase	HADHA	sp|P40939|ECHA_HUMAN Trifunctional enzyme subunit alpha, mitochondrial OS=Homo sapiens OX=9606 GN=HADHA PE=1 SV=2	By MS/MS	By MS/MS	By MS/MS	By MS/MS	By MS/MS	By matching	By matching	By MS/MS	By MS/MS	By MS/MS	By matching	By matching	By matching	By MS/MS	By MS/MS	By matching	By MS/MS	By MS/MS	43198000	5452000	3315900	4961500	1738400	2829700	933770	1752500	1149800	3844700	1349700	1527200	1064200	132710	1860600	2793600	725770	6438100	1327600
Q08945	Q08945	FACT complex subunit SSRP1	SSRP1	sp|Q08945|SSRP1_HUMAN FACT complex subunit SSRP1 OS=Homo sapiens OX=9606 GN=SSRP1 PE=1 SV=1	By MS/MS	By MS/MS	By MS/MS	By MS/MS	By matching	By MS/MS	By MS/MS	By MS/MS	By MS/MS	By MS/MS	By MS/MS	By MS/MS	By MS/MS	By MS/MS	By MS/MS	By MS/MS	By MS/MS	By MS/MS	42905000	4322800	3149600	1322200	2023400	1570900	3208700	4037300	1289400	2308600	850140	4596400	2910700	1995000	2116700	3115300	941250	2120400	1967200
P05023;P13637;P50993;Q13733;P20648;P54707	P05023	Sodium/potassium-transporting ATPase subunit alpha-1	ATP1A1	sp|P05023|AT1A1_HUMAN Sodium/potassium-transporting ATPase subunit alpha-1 OS=Homo sapiens OX=9606 GN=ATP1A1 PE=1 SV=1	By MS/MS	By MS/MS	By MS/MS	By MS/MS	By MS/MS	By MS/MS	By MS/MS	By MS/MS	By MS/MS	By MS/MS	By matching	By matching	By matching	By matching	By MS/MS	By matching	By matching	By MS/MS	42294000	5340100	3179400	4580100	1221200	4592400	802230	4118500	889270	5026200	1197000	1795500	1363000	258730	983350	3023000	599270	1690700	1634200
P04844	P04844	Dolichyl-diphosphooligosaccharide--protein glycosyltransferase subunit 2	RPN2	sp|P04844|RPN2_HUMAN Dolichyl-diphosphooligosaccharide--protein glycosyltransferase subunit 2 OS=Homo sapiens OX=9606 GN=RPN2 PE=1 SV=3	By MS/MS	By MS/MS	By MS/MS	By MS/MS	By MS/MS	By matching	By MS/MS	By MS/MS	By MS/MS	By MS/MS	By MS/MS	By MS/MS	By MS/MS	By MS/MS	By MS/MS	By MS/MS	By matching	By MS/MS	42290000	5706600	3083900	3626500	1598200	3669700	1419900	3593200	1497200	2208200	2169900	2063200	1689200	690560	1398800	3125500	1093800	1221400	2434200
Q96IX5	Q96IX5	ATP synthase membrane subunit K, mitochondrial	ATP5MK	sp|Q96IX5|ATPMK_HUMAN ATP synthase membrane subunit K, mitochondrial OS=Homo sapiens OX=9606 GN=ATP5MK PE=1 SV=1	By MS/MS	By matching	None	None	None	None	By matching	By matching	By matching	By matching	By matching	None	None	None	By matching	None	None	None	42109000	7413200	5265400	0	0	0	0	7131600	2596100	5892700	4136600	5212200	0	0	0	4461400	0	0	0
Q9Y230	Q9Y230	RuvB-like 2	RUVBL2	sp|Q9Y230|RUVB2_HUMAN RuvB-like 2 OS=Homo sapiens OX=9606 GN=RUVBL2 PE=1 SV=3	By MS/MS	By MS/MS	By MS/MS	By matching	By MS/MS	By matching	By MS/MS	By MS/MS	By MS/MS	By MS/MS	By MS/MS	By MS/MS	By MS/MS	By MS/MS	By MS/MS	By matching	By MS/MS	By MS/MS	41941000	3481300	3369100	1738600	1519000	2269400	2259500	3660700	999210	2563600	1700800	2775900	1412000	987410	1999800	3811200	2050700	3154100	2188600
Q9Y2W2	Q9Y2W2	WW domain-binding protein 11	WBP11	sp|Q9Y2W2|WBP11_HUMAN WW domain-binding protein 11 OS=Homo sapiens OX=9606 GN=WBP11 PE=1 SV=1	By MS/MS	By MS/MS	By MS/MS	By MS/MS	By MS/MS	By MS/MS	By MS/MS	By MS/MS	By MS/MS	By MS/MS	By MS/MS	By MS/MS	By MS/MS	By MS/MS	By MS/MS	By matching	By matching	By MS/MS	41576000	3493400	3201200	1343300	2549800	1940900	3499200	3700000	1193500	2563200	529470	4608000	3215000	1506600	1602600	2288200	245090	572020	3525100
Q7Z4V5	Q7Z4V5	Hepatoma-derived growth factor-related protein 2	HDGFL2	sp|Q7Z4V5|HDGR2_HUMAN Hepatoma-derived growth factor-related protein 2 OS=Homo sapiens OX=9606 GN=HDGFL2 PE=1 SV=1	By MS/MS	By MS/MS	By MS/MS	By MS/MS	By MS/MS	By MS/MS	By MS/MS	By MS/MS	By MS/MS	By MS/MS	By MS/MS	By matching	By MS/MS	By MS/MS	By MS/MS	By matching	By matching	By matching	41172000	3258300	4256200	2149500	3576400	2118100	2415700	6017000	1225000	2778300	1609900	4245900	2163400	1845100	682300	563700	675450	651640	939540
O00487	O00487	26S proteasome non-ATPase regulatory subunit 14	PSMD14	sp|O00487|PSDE_HUMAN 26S proteasome non-ATPase regulatory subunit 14 OS=Homo sapiens OX=9606 GN=PSMD14 PE=1 SV=1	By MS/MS	By MS/MS	By matching	By matching	By matching	By MS/MS	By matching	By matching	By MS/MS	By MS/MS	By MS/MS	By MS/MS	By MS/MS	By MS/MS	By MS/MS	By MS/MS	By MS/MS	By MS/MS	41125000	2583700	2644900	1190100	2659800	1357500	1630200	3131300	1126600	1611200	2088300	3103700	2817800	2427000	2317000	3319500	1606400	3406600	2103500
Q9NR31;Q9Y6B6	Q9NR31;Q9Y6B6	GTP-binding protein SAR1a;GTP-binding protein SAR1b	SAR1A;SAR1B	sp|Q9NR31|SAR1A_HUMAN Small COPII coat GTPase SAR1A OS=Homo sapiens OX=9606 GN=SAR1A PE=1 SV=1;sp|Q9Y6B6|SAR1B_HUMAN Small COPII coat GTPase SAR1B OS=Homo sapiens OX=9606 GN=SAR1B PE=1 SV=1	By MS/MS	By matching	By MS/MS	By matching	By MS/MS	By matching	By matching	By matching	By matching	None	By matching	None	None	By matching	By matching	None	By matching	By matching	40094000	7283800	4743000	4669500	2559800	3924900	951140	3808600	629980	4150700	0	979710	0	0	2428000	2648000	0	1176500	140820
Q9H444	Q9H444	Charged multivesicular body protein 4b	CHMP4B	sp|Q9H444|CHM4B_HUMAN Charged multivesicular body protein 4b OS=Homo sapiens OX=9606 GN=CHMP4B PE=1 SV=1	By MS/MS	By matching	By matching	By matching	By matching	By matching	By matching	By matching	By MS/MS	By matching	By matching	By matching	By matching	By matching	By MS/MS	By matching	By matching	By matching	39993000	3982200	3732200	1894200	1591300	1403100	2642700	3187100	1311100	2057800	1464300	3684900	1672300	1617600	2008900	2634700	1285900	1760400	2062600
P00338	P00338	L-lactate dehydrogenase A chain	LDHA	sp|P00338|LDHA_HUMAN L-lactate dehydrogenase A chain OS=Homo sapiens OX=9606 GN=LDHA PE=1 SV=2	By MS/MS	By matching	By MS/MS	By matching	By MS/MS	By matching	By matching	By matching	By matching	By matching	By matching	By matching	By matching	By matching	By matching	By matching	By matching	By matching	39876000	5036500	2629400	6081900	2098200	3373000	1812700	2575000	1476300	2446900	1865400	569070	943660	474360	1702500	2207500	612320	2267900	1704000
P50990	P50990	T-complex protein 1 subunit theta	CCT8	sp|P50990|TCPQ_HUMAN T-complex protein 1 subunit theta OS=Homo sapiens OX=9606 GN=CCT8 PE=1 SV=4	By MS/MS	By MS/MS	By MS/MS	By MS/MS	By MS/MS	By MS/MS	By MS/MS	By matching	By MS/MS	By matching	By MS/MS	By matching	By MS/MS	By MS/MS	By matching	By matching	By MS/MS	By MS/MS	39642000	3651700	3372900	3852700	1848200	2024600	1513200	3367700	1008400	2181700	1455300	2455600	1441600	1335800	1248200	2606200	1331300	2223300	2724000
P51991	P51991	Heterogeneous nuclear ribonucleoprotein A3	HNRNPA3	sp|P51991|ROA3_HUMAN Heterogeneous nuclear ribonucleoprotein A3 OS=Homo sapiens OX=9606 GN=HNRNPA3 PE=1 SV=2	By MS/MS	By MS/MS	By MS/MS	By MS/MS	By MS/MS	By matching	By MS/MS	By matching	By MS/MS	By matching	By matching	By matching	By matching	By matching	By matching	By matching	By matching	By matching	39624000	6124800	2561800	6287200	3658100	3445000	294090	5470100	631400	8276500	1244400	618860	224930	233530	340400	503490	181780	472080	442530
Q16563	Q16563	Synaptophysin-like protein 1	SYPL1	sp|Q16563|SYPL1_HUMAN Synaptophysin-like protein 1 OS=Homo sapiens OX=9606 GN=SYPL1 PE=1 SV=1	By MS/MS	By MS/MS	By MS/MS	By MS/MS	By MS/MS	None	By MS/MS	By MS/MS	None	None	By MS/MS	None	None	By MS/MS	By MS/MS	None	None	None	39493000	4617100	4723000	4258600	1944900	4547200	0	4772800	3948500	0	0	6288500	0	0	0	4392500	0	0	0
P60059	P60059	Protein transport protein Sec61 subunit gamma	SEC61G	sp|P60059|SC61G_HUMAN Protein transport protein Sec61 subunit gamma OS=Homo sapiens OX=9606 GN=SEC61G PE=1 SV=1	By MS/MS	None	By MS/MS	None	By MS/MS	None	None	By MS/MS	None	By MS/MS	None	By MS/MS	None	None	By MS/MS	None	None	By MS/MS	39391000	0	0	14193000	0	13566000	0	0	0	0	0	0	0	0	0	0	0	0	11633000
Q9UHA3	Q9UHA3	Probable ribosome biogenesis protein RLP24	RSL24D1	sp|Q9UHA3|RLP24_HUMAN Probable ribosome biogenesis protein RLP24 OS=Homo sapiens OX=9606 GN=RSL24D1 PE=1 SV=1	By matching	None	By matching	By matching	None	By matching	By matching	None	None	None	By MS/MS	By matching	None	None	By matching	None	None	None	38883000	3314100	0	3591700	3377400	0	2396700	6889000	0	0	0	11255000	3269900	0	0	4788800	0	0	0
P42696	P42696	RNA-binding protein 34	RBM34	sp|P42696|RBM34_HUMAN RNA-binding protein 34 OS=Homo sapiens OX=9606 GN=RBM34 PE=1 SV=2	By MS/MS	By MS/MS	By MS/MS	By MS/MS	By MS/MS	By MS/MS	By MS/MS	By MS/MS	By MS/MS	By MS/MS	By MS/MS	By matching	By matching	By matching	By matching	By matching	By matching	By matching	38867000	1708600	4311200	1670900	2778900	1580400	2622200	9597100	1481100	1140400	1009600	6412400	1167900	553330	525300	669660	248280	519660	870490
Q9NX24	Q9NX24	H/ACA ribonucleoprotein complex subunit 2	NHP2	sp|Q9NX24|NHP2_HUMAN H/ACA ribonucleoprotein complex subunit 2 OS=Homo sapiens OX=9606 GN=NHP2 PE=1 SV=1	By matching	By MS/MS	By matching	By matching	By MS/MS	By matching	By MS/MS	By matching	By MS/MS	None	By MS/MS	By matching	By matching	By matching	None	By matching	By matching	By matching	38771000	4698700	5637000	3261100	3455200	1921700	10131000	6129300	7346500	22022000	0	8057100	2164100	889840	4863500	0	4170400	4998500	2557100
P22352	P22352	Glutathione peroxidase 3	GPX3	sp|P22352|GPX3_HUMAN Glutathione peroxidase 3 OS=Homo sapiens OX=9606 GN=GPX3 PE=1 SV=2	By MS/MS	By matching	By matching	By matching	None	By matching	None	By matching	None	None	By matching	By MS/MS	By matching	By MS/MS	By matching	By matching	By MS/MS	By matching	38547000	4769600	3625300	1227800	1454900	0	2448600	0	1422600	0	0	2608200	2728800	551510	3452500	4121700	1237600	6250700	2647300
Q9BVK6	Q9BVK6	Transmembrane emp24 domain-containing protein 9	TMED9	sp|Q9BVK6|TMED9_HUMAN Transmembrane emp24 domain-containing protein 9 OS=Homo sapiens OX=9606 GN=TMED9 PE=1 SV=2	By MS/MS	By matching	By MS/MS	By MS/MS	By MS/MS	By MS/MS	By matching	By MS/MS	By MS/MS	By MS/MS	By MS/MS	By matching	By matching	By MS/MS	By MS/MS	By matching	By MS/MS	By matching	38324000	4334000	1244800	6919000	883930	6219500	812590	4511300	1192600	1750600	1071300	1546400	818080	444980	1086000	1701100	510700	2224100	1053100
Q9NX63	Q9NX63	MICOS complex subunit MIC19	CHCHD3	sp|Q9NX63|MIC19_HUMAN MICOS complex subunit MIC19 OS=Homo sapiens OX=9606 GN=CHCHD3 PE=1 SV=1	By MS/MS	By MS/MS	By matching	By matching	By MS/MS	By matching	By MS/MS	By matching	By MS/MS	By MS/MS	By MS/MS	By matching	By matching	By MS/MS	By MS/MS	By matching	By MS/MS	By matching	37899000	3242000	2620800	2009900	1647600	2182200	1652400	2433200	1417100	2378000	1726700	3198700	2010200	1089600	2367200	2755000	1181100	2373600	1613200
P55209	P55209	Nucleosome assembly protein 1-like 1	NAP1L1	sp|P55209|NP1L1_HUMAN Nucleosome assembly protein 1-like 1 OS=Homo sapiens OX=9606 GN=NAP1L1 PE=1 SV=1	By MS/MS	By matching	By MS/MS	By matching	By matching	By matching	By matching	By matching	By matching	By matching	By matching	None	By matching	By matching	By matching	By matching	By matching	By matching	37573000	4528300	2301500	2021900	2342700	1897800	2174400	2535600	2454500	2767900	1722200	1857500	0	1537400	1579100	2543100	1205300	2683300	1420800
P50991	P50991	T-complex protein 1 subunit delta	CCT4	sp|P50991|TCPD_HUMAN T-complex protein 1 subunit delta OS=Homo sapiens OX=9606 GN=CCT4 PE=1 SV=4	By MS/MS	By MS/MS	By MS/MS	By matching	By matching	By matching	By MS/MS	By matching	By matching	By matching	By MS/MS	By MS/MS	By MS/MS	By MS/MS	By matching	By matching	By MS/MS	By MS/MS	37369000	4179100	2361300	2528300	1679200	1581900	1876300	3097900	308830	482790	947440	2799800	1689400	1399200	2915300	2632100	1611000	2833000	2445700
O75947	O75947	ATP synthase subunit d, mitochondrial	ATP5PD	sp|O75947|ATP5H_HUMAN ATP synthase subunit d, mitochondrial OS=Homo sapiens OX=9606 GN=ATP5PD PE=1 SV=3	By MS/MS	By matching	By MS/MS	By matching	By MS/MS	By matching	By matching	By matching	By MS/MS	By MS/MS	By matching	By matching	By matching	By matching	By MS/MS	By matching	By matching	By matching	37040000	3306600	2739600	2844200	1683800	2508200	1487400	2879800	1670700	2144600	2027200	1833200	1327800	890420	1774100	2959400	1075200	2217600	1670400
Q13838;O00148	Q13838;O00148	Spliceosome RNA helicase DDX39B;ATP-dependent RNA helicase DDX39A	DDX39B;DDX39A	sp|Q13838|DX39B_HUMAN Spliceosome RNA helicase DDX39B OS=Homo sapiens OX=9606 GN=DDX39B PE=1 SV=1;sp|O00148|DX39A_HUMAN ATP-dependent RNA helicase DDX39A OS=Homo sapiens OX=9606 GN=DDX39A PE=1 SV=2	By MS/MS	By MS/MS	By MS/MS	By matching	By MS/MS	By matching	By MS/MS	By matching	By MS/MS	By matching	By MS/MS	By matching	By matching	By matching	By MS/MS	By matching	By MS/MS	By matching	36917000	4345800	1900500	3902100	344800	4306300	1517800	4947000	1043800	3531700	1166900	3314600	211230	626010	1274400	1131000	830220	1515600	1006700
P61326;Q96A72	P61326;Q96A72	Protein mago nashi homolog;Protein mago nashi homolog 2	MAGOH;MAGOHB	sp|P61326|MGN_HUMAN Protein mago nashi homolog OS=Homo sapiens OX=9606 GN=MAGOH PE=1 SV=1;sp|Q96A72|MGN2_HUMAN Protein mago nashi homolog 2 OS=Homo sapiens OX=9606 GN=MAGOHB PE=1 SV=1	By MS/MS	By MS/MS	By MS/MS	By MS/MS	By MS/MS	By MS/MS	By MS/MS	By matching	By MS/MS	By matching	By MS/MS	By matching	By matching	By matching	By matching	By matching	By matching	By matching	36278000	3396800	3370700	1836700	2227500	1460700	2072400	4011600	1241400	2504000	1094800	4301000	1142200	716540	1386200	1625700	1107400	1374400	1408300
P38117	P38117	Electron transfer flavoprotein subunit beta	ETFB	sp|P38117|ETFB_HUMAN Electron transfer flavoprotein subunit beta OS=Homo sapiens OX=9606 GN=ETFB PE=1 SV=3	By MS/MS	By MS/MS	By MS/MS	By matching	By MS/MS	By matching	By MS/MS	By MS/MS	By MS/MS	None	By MS/MS	By MS/MS	By MS/MS	By MS/MS	By MS/MS	By MS/MS	By MS/MS	By MS/MS	36135000	2025100	3244800	3043800	455810	3120400	932720	3347400	370380	512660	0	1682500	4207700	879720	2548200	2722700	1498200	3754800	1788200
P61106	P61106	Ras-related protein Rab-14	RAB14	sp|P61106|RAB14_HUMAN Ras-related protein Rab-14 OS=Homo sapiens OX=9606 GN=RAB14 PE=1 SV=4	By MS/MS	By matching	By MS/MS	By MS/MS	By MS/MS	None	By matching	By matching	By matching	By matching	By matching	By matching	By matching	By matching	By matching	By matching	None	By MS/MS	36001000	5379500	3320200	4046500	2261100	3448500	0	3555100	1919200	1393900	944750	1620300	1853800	767180	1114200	1100300	1158300	0	2117900
P82909	P82909	Alpha-ketoglutarate dehydrogenase component 4	KGD4	sp|P82909|KGD4_HUMAN Alpha-ketoglutarate dehydrogenase component 4 OS=Homo sapiens OX=9606 GN=KGD4 PE=1 SV=2	None	None	None	None	None	None	By matching	By matching	None	By matching	None	By MS/MS	By matching	By matching	By MS/MS	By MS/MS	None	None	35523000	0	0	0	0	0	0	3845100	3184900	0	2623400	0	5109700	2354100	5371300	7940600	5093800	0	0
P21333	P21333	Filamin-A	FLNA	sp|P21333|FLNA_HUMAN Filamin-A OS=Homo sapiens OX=9606 GN=FLNA PE=1 SV=4	By MS/MS	By MS/MS	By MS/MS	By MS/MS	By MS/MS	By MS/MS	By MS/MS	By MS/MS	By MS/MS	By MS/MS	By matching	By MS/MS	By matching	By MS/MS	By MS/MS	By matching	By MS/MS	By MS/MS	35077000	5212000	2284400	5365100	1372700	2647300	1134500	3286300	827660	2525100	1067100	1651700	1135900	318470	1218700	1704700	367800	1658800	1298400
O75151;Q6ZMT4	O75151;Q6ZMT4	Lysine-specific demethylase PHF2;Lysine-specific demethylase 7A	PHF2;KDM7A	sp|O75151|PHF2_HUMAN Lysine-specific demethylase PHF2 OS=Homo sapiens OX=9606 GN=PHF2 PE=1 SV=4;sp|Q6ZMT4|KDM7A_HUMAN Lysine-specific demethylase 7A OS=Homo sapiens OX=9606 GN=KDM7A PE=1 SV=2	By MS/MS	By MS/MS	By matching	By MS/MS	By MS/MS	By MS/MS	By MS/MS	By MS/MS	By MS/MS	By MS/MS	By MS/MS	By MS/MS	By matching	By MS/MS	By MS/MS	By MS/MS	By matching	By MS/MS	34977000	3237600	3653700	438890	2707200	713810	1705300	3742700	983680	3905100	707420	4294100	1818800	116150	1410600	1336200	1794800	758810	1651800
Q8IYB3	Q8IYB3	Serine/arginine repetitive matrix protein 1	SRRM1	sp|Q8IYB3|SRRM1_HUMAN Serine/arginine repetitive matrix protein 1 OS=Homo sapiens OX=9606 GN=SRRM1 PE=1 SV=2	By MS/MS	By MS/MS	By MS/MS	By MS/MS	By MS/MS	By MS/MS	By MS/MS	By MS/MS	By MS/MS	By MS/MS	By MS/MS	By MS/MS	By MS/MS	By MS/MS	By MS/MS	By MS/MS	By matching	By MS/MS	34663000	2260200	1872000	1378000	2681600	1113100	2962500	4670200	1227700	4266100	1025400	5734900	921830	657630	631310	928290	729500	856150	746370
P38919	P38919	Eukaryotic initiation factor 4A-III;Eukaryotic initiation factor 4A-III, N-terminally processed	EIF4A3	sp|P38919|IF4A3_HUMAN Eukaryotic initiation factor 4A-III OS=Homo sapiens OX=9606 GN=EIF4A3 PE=1 SV=4	By MS/MS	By MS/MS	By MS/MS	By MS/MS	By MS/MS	By MS/MS	By matching	By matching	By MS/MS	By MS/MS	By MS/MS	By MS/MS	By matching	By matching	None	By matching	By matching	By matching	34571000	4034400	2953100	2323100	3014000	2251300	2237500	3457000	1091100	839520	1383700	3353800	1429000	1183200	887650	0	1122600	1556500	1453700
P07195	P07195	L-lactate dehydrogenase B chain	LDHB	sp|P07195|LDHB_HUMAN L-lactate dehydrogenase B chain OS=Homo sapiens OX=9606 GN=LDHB PE=1 SV=2	By MS/MS	By matching	By MS/MS	By matching	By MS/MS	By matching	By matching	By matching	By matching	By matching	By matching	By matching	By matching	By matching	By matching	By matching	By matching	By matching	34017000	3770600	3387900	5343000	1374200	3463900	1110000	2118000	860160	1604200	1059600	1675200	1666800	250050	1100200	1505400	241220	1391800	2094800
Q5T3I0	Q5T3I0	G patch domain-containing protein 4	GPATCH4	sp|Q5T3I0|GPTC4_HUMAN G patch domain-containing protein 4 OS=Homo sapiens OX=9606 GN=GPATCH4 PE=1 SV=2	By MS/MS	By MS/MS	By matching	By MS/MS	By MS/MS	By MS/MS	By MS/MS	By MS/MS	By MS/MS	By matching	By MS/MS	By MS/MS	By matching	By matching	By matching	By matching	By matching	By matching	33855000	3108900	3431600	1396900	1748800	954740	1327400	6031700	925430	3699400	840580	6529400	932550	406940	447500	604110	377510	350750	741010
Q8NCU1	Q8NCU1	Uncharacterized protein CCDC197	CCDC197	sp|Q8NCU1|CC197_HUMAN Uncharacterized protein CCDC197 OS=Homo sapiens OX=9606 GN=CCDC197 PE=1 SV=2	By MS/MS	By MS/MS	By MS/MS	By MS/MS	By MS/MS	By MS/MS	By matching	By matching	By matching	By MS/MS	By matching	By MS/MS	By MS/MS	By MS/MS	By MS/MS	By MS/MS	By MS/MS	By MS/MS	33534000	1444900	2714200	979960	1367300	1258000	1809600	3068800	1455700	60585	876440	3465300	2559600	1517200	1603900	2496100	1895100	3039000	1922400
P09211	P09211	Glutathione S-transferase P	GSTP1	sp|P09211|GSTP1_HUMAN Glutathione S-transferase P OS=Homo sapiens OX=9606 GN=GSTP1 PE=1 SV=2	By MS/MS	By MS/MS	By MS/MS	By matching	By MS/MS	By matching	By matching	By matching	By matching	By matching	By matching	By matching	By matching	By MS/MS	By MS/MS	By matching	By MS/MS	By MS/MS	33077000	3724100	2640300	2273900	1089100	1964900	1090000	1730800	915640	1437600	1162600	951840	1237900	547940	1636000	5454000	923860	2534900	1761400
Q96LD4	Q96LD4	E3 ubiquitin-protein ligase TRIM47	TRIM47	sp|Q96LD4|TRI47_HUMAN E3 ubiquitin-protein ligase TRIM47 OS=Homo sapiens OX=9606 GN=TRIM47 PE=1 SV=2	None	None	By MS/MS	None	None	None	By MS/MS	By MS/MS	None	None	By MS/MS	None	None	By MS/MS	By MS/MS	By MS/MS	None	None	32706000	0	0	1299600	0	0	0	7326400	2184000	0	0	9133800	0	0	3396000	4850600	4516000	0	0
Q13740	Q13740	CD166 antigen	ALCAM	sp|Q13740|CD166_HUMAN CD166 antigen OS=Homo sapiens OX=9606 GN=ALCAM PE=1 SV=2	By MS/MS	By MS/MS	By MS/MS	By MS/MS	By MS/MS	By MS/MS	By MS/MS	By matching	By MS/MS	By MS/MS	By matching	By matching	By matching	By matching	By MS/MS	By matching	By matching	By MS/MS	32640000	3384500	2088800	4028700	1050500	2768400	1583200	3700600	1116200	2820100	1143100	2163100	589890	293440	806540	2133100	582480	1073700	1313400
P52272	P52272	Heterogeneous nuclear ribonucleoprotein M	HNRNPM	sp|P52272|HNRPM_HUMAN Heterogeneous nuclear ribonucleoprotein M OS=Homo sapiens OX=9606 GN=HNRNPM PE=1 SV=3	By MS/MS	By MS/MS	By MS/MS	By MS/MS	By MS/MS	By MS/MS	By MS/MS	By matching	By MS/MS	By MS/MS	By MS/MS	By MS/MS	By matching	By matching	By matching	By matching	By MS/MS	By matching	32425000	3198600	1909000	3120900	1667700	2029300	1591200	3835300	852660	2464800	981300	2686600	1314100	548030	1040400	1823000	167160	1767900	1427100
P82664	P82664	Small ribosomal subunit protein uS10m	MRPS10	sp|P82664|RT10_HUMAN Small ribosomal subunit protein uS10m OS=Homo sapiens OX=9606 GN=MRPS10 PE=1 SV=2	By matching	By matching	By matching	By matching	By matching	By MS/MS	By matching	By matching	By matching	By matching	By matching	By matching	By matching	By matching	By matching	By matching	By matching	By matching	31792000	2276400	2229000	1014400	961380	1112900	2377300	2252400	1166000	2936900	1092300	1946400	1152800	1690800	1958100	2397700	1582400	1755300	1889200
Q96QD8	Q96QD8	Sodium-coupled neutral amino acid symporter 2	SLC38A2	sp|Q96QD8|S38A2_HUMAN Sodium-coupled neutral amino acid symporter 2 OS=Homo sapiens OX=9606 GN=SLC38A2 PE=1 SV=2	By MS/MS	By MS/MS	By MS/MS	By matching	By matching	None	By matching	None	By matching	By matching	None	By matching	None	By matching	None	None	By matching	By matching	31149000	4895900	3429600	3818000	1748100	2390400	0	2033300	0	4511600	2752700	0	916830	0	1244200	0	0	1485500	1922700
P61619;Q9H9S3	P61619	Protein transport protein Sec61 subunit alpha isoform 1	SEC61A1	sp|P61619|S61A1_HUMAN Protein transport protein Sec61 subunit alpha isoform 1 OS=Homo sapiens OX=9606 GN=SEC61A1 PE=1 SV=2	By MS/MS	By MS/MS	By MS/MS	By MS/MS	By MS/MS	By matching	By MS/MS	By MS/MS	By MS/MS	By MS/MS	By matching	By MS/MS	By matching	By MS/MS	By matching	By matching	By MS/MS	By MS/MS	30825000	4958000	2722700	3405000	1185800	2832400	1008300	2564100	1575700	798020	1501100	188460	1354300	443570	1213200	1668300	420610	1690100	1295100
P61020;P20339;P51148	P61020;P20339;P51148	Ras-related protein Rab-5B;Ras-related protein Rab-5A;Ras-related protein Rab-5C	RAB5B;RAB5A;RAB5C	sp|P61020|RAB5B_HUMAN Ras-related protein Rab-5B OS=Homo sapiens OX=9606 GN=RAB5B PE=1 SV=1;sp|P20339|RAB5A_HUMAN Ras-related protein Rab-5A OS=Homo sapiens OX=9606 GN=RAB5A PE=1 SV=2;sp|P51148|RAB5C_HUMAN Ras-related protein Rab-5C OS=Homo sapiens OX=9606	By MS/MS	By MS/MS	By MS/MS	By MS/MS	By MS/MS	By matching	By MS/MS	By matching	By MS/MS	By MS/MS	By matching	By matching	By matching	By matching	By MS/MS	By matching	By MS/MS	By MS/MS	30371000	4475100	1869400	2413900	815870	2445800	1102400	2145400	820310	3435400	938820	1445000	1115500	341970	991100	1973000	851370	2120600	1070300
Q99832	Q99832	T-complex protein 1 subunit eta;T-complex protein 1 subunit eta, N-terminally processed	CCT7	sp|Q99832|TCPH_HUMAN T-complex protein 1 subunit eta OS=Homo sapiens OX=9606 GN=CCT7 PE=1 SV=2	By MS/MS	By MS/MS	By MS/MS	By MS/MS	By MS/MS	By matching	By MS/MS	By MS/MS	By MS/MS	By MS/MS	By MS/MS	By MS/MS	By matching	By MS/MS	By MS/MS	By MS/MS	By MS/MS	By MS/MS	30218000	4822100	2161700	2521400	941670	2500000	942850	1792200	475720	1267200	836900	1876800	1006400	936820	1071100	3120600	1183400	1733500	1027300
Q96HE7;Q86YB8	Q96HE7	ERO1-like protein alpha	ERO1A	sp|Q96HE7|ERO1A_HUMAN ERO1-like protein alpha OS=Homo sapiens OX=9606 GN=ERO1A PE=1 SV=2	By MS/MS	By MS/MS	By MS/MS	By matching	By MS/MS	By matching	By MS/MS	By matching	By MS/MS	By matching	By matching	By matching	By matching	By matching	By MS/MS	By matching	By matching	By matching	30027000	3896600	1620700	3185000	1204500	2532000	896580	3327500	1187700	3143800	874750	1772100	572180	275790	1134900	1248400	754130	1455500	945480
P38159;Q96E39;O75526;Q8N7X1	P38159;Q96E39;O75526	RNA-binding motif protein, X chromosome;RNA-binding motif protein, X chromosome, N-terminally processed;RNA binding motif protein, X-linked-like-1;RNA-binding motif protein, X-linked-like-2	RBMX;RBMXL1;RBMXL2	sp|P38159|RBMX_HUMAN RNA-binding motif protein, X chromosome OS=Homo sapiens OX=9606 GN=RBMX PE=1 SV=3;sp|Q96E39|RMXL1_HUMAN RNA binding motif protein, X-linked-like-1 OS=Homo sapiens OX=9606 GN=RBMXL1 PE=1 SV=1;sp|O75526|RMXL2_HUMAN RNA-binding motif prot	By MS/MS	By MS/MS	By MS/MS	By MS/MS	By MS/MS	By MS/MS	By MS/MS	By MS/MS	By MS/MS	By MS/MS	By MS/MS	By matching	By matching	By matching	By matching	By matching	By matching	By matching	29731000	2305200	2232400	2240200	2164200	2333700	1528900	4047400	1466100	2568100	592010	3596000	1134100	453280	218680	1128600	274240	403870	1043900
Q9NWT1	Q9NWT1	p21-activated protein kinase-interacting protein 1	PAK1IP1	sp|Q9NWT1|PK1IP_HUMAN p21-activated protein kinase-interacting protein 1 OS=Homo sapiens OX=9606 GN=PAK1IP1 PE=1 SV=2	By MS/MS	By MS/MS	By MS/MS	By MS/MS	By MS/MS	By MS/MS	By MS/MS	By MS/MS	By MS/MS	By MS/MS	By MS/MS	By MS/MS	By MS/MS	By matching	By MS/MS	By matching	By MS/MS	By MS/MS	29668000	2125800	3401400	707220	1759900	1751400	1745800	3525900	1069500	2019400	733800	4491300	1578500	766130	628750	939740	634990	828730	959750
Q15629	Q15629	Translocating chain-associated membrane protein 1	TRAM1	sp|Q15629|TRAM1_HUMAN Translocating chain-associated membrane protein 1 OS=Homo sapiens OX=9606 GN=TRAM1 PE=1 SV=3	By MS/MS	By matching	By MS/MS	By matching	By MS/MS	By matching	By matching	By matching	None	By MS/MS	By matching	By matching	None	None	By matching	By matching	By matching	By matching	29445000	6355100	1164400	3796400	596790	1412200	541410	1553200	695880	0	2779000	560360	2637000	0	0	3786500	134170	1192800	2239800
O15446	O15446	DNA-directed RNA polymerase I subunit RPA34	POLR1G	sp|O15446|RPA34_HUMAN DNA-directed RNA polymerase I subunit RPA34 OS=Homo sapiens OX=9606 GN=POLR1G PE=1 SV=1	By MS/MS	By MS/MS	By MS/MS	By MS/MS	By MS/MS	By MS/MS	By MS/MS	By matching	By MS/MS	By matching	By MS/MS	By matching	By matching	None	By matching	None	By matching	By matching	29404000	2292700	2823100	1116700	1860300	1395900	2611000	5174100	745900	3602900	558450	5014700	895540	328960	0	389960	0	247380	346470
Q01469	Q01469	Fatty acid-binding protein 5	FABP5	sp|Q01469|FABP5_HUMAN Fatty acid-binding protein 5 OS=Homo sapiens OX=9606 GN=FABP5 PE=1 SV=3	By matching	By matching	By matching	By matching	By MS/MS	By matching	By matching	By matching	By matching	By matching	By MS/MS	By matching	By matching	By matching	None	None	By matching	By matching	28685000	2867400	1446900	1981800	747340	4725400	565850	2030900	990350	1945800	1245500	5358300	1550900	276310	496240	0	0	1761200	694400
P30048	P30048	Thioredoxin-dependent peroxide reductase, mitochondrial	PRDX3	sp|P30048|PRDX3_HUMAN Thioredoxin-dependent peroxide reductase, mitochondrial OS=Homo sapiens OX=9606 GN=PRDX3 PE=1 SV=3	By MS/MS	By matching	By MS/MS	By matching	By MS/MS	By matching	By matching	By matching	By MS/MS	By matching	By matching	By matching	By matching	By matching	By matching	By matching	By matching	By matching	28607000	3859800	1728700	3805300	1083700	1654200	746980	2202700	804660	1608600	1094000	1885300	1484600	178320	1151100	1813800	339460	1712200	1453200
Q8WZA1	Q8WZA1	Protein O-linked-mannose beta-1,2-N-acetylglucosaminyltransferase 1	POMGNT1	sp|Q8WZA1|PMGT1_HUMAN Protein O-linked-mannose beta-1,2-N-acetylglucosaminyltransferase 1 OS=Homo sapiens OX=9606 GN=POMGNT1 PE=1 SV=2	By MS/MS	By MS/MS	By matching	By MS/MS	By matching	By MS/MS	By MS/MS	By MS/MS	By matching	By matching	By MS/MS	By MS/MS	By MS/MS	By MS/MS	By MS/MS	By MS/MS	By MS/MS	By MS/MS	28557000	2769900	3327300	410880	2114600	286340	1847600	4015700	949400	427970	774530	953770	823510	894430	1483900	2698700	1138100	1701200	1939700
Q8WWL7	Q8WWL7	G2/mitotic-specific cyclin-B3	CCNB3	sp|Q8WWL7|CCNB3_HUMAN G2/mitotic-specific cyclin-B3 OS=Homo sapiens OX=9606 GN=CCNB3 PE=1 SV=2	By MS/MS	By MS/MS	By MS/MS	By MS/MS	None	By MS/MS	By MS/MS	By MS/MS	None	By MS/MS	By MS/MS	By MS/MS	By MS/MS	By MS/MS	By MS/MS	By MS/MS	By MS/MS	None	28527000	1852400	1315100	1543200	1425700	0	2091600	1438400	1196200	0	1345300	2589700	2826000	1305600	2100800	2789100	2354900	2352800	0
P56182	P56182	Ribosomal RNA processing protein 1 homolog A	RRP1	sp|P56182|RRP1_HUMAN Ribosomal RNA processing protein 1 homolog A OS=Homo sapiens OX=9606 GN=RRP1 PE=1 SV=1	By MS/MS	By MS/MS	By MS/MS	By MS/MS	By MS/MS	By matching	By MS/MS	By MS/MS	By MS/MS	By MS/MS	By MS/MS	None	By matching	By matching	By matching	By matching	By matching	By matching	28476000	4073500	2222000	1261600	1632900	1871100	1006700	4380600	1299800	3476500	1336300	3583600	0	249790	321610	535690	147590	228210	848490
Q9UDW1	Q9UDW1	Cytochrome b-c1 complex subunit 9	UQCR10	sp|Q9UDW1|QCR9_HUMAN Cytochrome b-c1 complex subunit 9 OS=Homo sapiens OX=9606 GN=UQCR10 PE=1 SV=3	By matching	None	By MS/MS	By matching	By MS/MS	None	By MS/MS	By matching	None	By matching	By matching	By matching	By matching	By matching	By MS/MS	None	By matching	By matching	28392000	9183900	0	9697200	2034600	6446100	0	7395100	4628400	0	3213800	4227200	2248700	1251500	4490600	5987900	0	3083800	2352300
P62879;Q9HAV0;P62873	P62879;Q9HAV0;P62873	Guanine nucleotide-binding protein G(I)/G(S)/G(T) subunit beta-2;Guanine nucleotide-binding protein subunit beta-4;Guanine nucleotide-binding protein G(I)/G(S)/G(T) subunit beta-1	GNB2;GNB4;GNB1	sp|P62879|GBB2_HUMAN Guanine nucleotide-binding protein G(I)/G(S)/G(T) subunit beta-2 OS=Homo sapiens OX=9606 GN=GNB2 PE=1 SV=3;sp|Q9HAV0|GBB4_HUMAN Guanine nucleotide-binding protein subunit beta-4 OS=Homo sapiens OX=9606 GN=GNB4 PE=1 SV=3;sp|P62873|GBB1_	By matching	By matching	By MS/MS	By matching	By matching	By matching	By matching	By matching	By matching	By MS/MS	By matching	By matching	By matching	By matching	By matching	By matching	By matching	By matching	28229000	4005400	1382400	2908100	714230	1721000	744720	2549000	1283600	2500700	1814700	1215700	1193000	372250	856690	1596900	836310	1864600	669440
Q13509	Q13509	Tubulin beta-3 chain	TUBB3	sp|Q13509|TBB3_HUMAN Tubulin beta-3 chain OS=Homo sapiens OX=9606 GN=TUBB3 PE=1 SV=2	By MS/MS	By matching	By MS/MS	By matching	By matching	By matching	By matching	By matching	By matching	By matching	By matching	By matching	By matching	By MS/MS	By matching	By matching	By MS/MS	By matching	28200000	5369500	1699900	2129900	1056600	1231500	752620	995370	1129200	1212100	1269800	1703300	910650	316710	2210200	1079400	526590	3491600	1115400
P17480	P17480	Nucleolar transcription factor 1	UBTF	sp|P17480|UBF1_HUMAN Nucleolar transcription factor 1 OS=Homo sapiens OX=9606 GN=UBTF PE=1 SV=1	By MS/MS	By MS/MS	By MS/MS	By MS/MS	By MS/MS	By MS/MS	By MS/MS	By MS/MS	By MS/MS	By MS/MS	By MS/MS	By MS/MS	By MS/MS	By MS/MS	By MS/MS	By MS/MS	By MS/MS	By MS/MS	28133000	1490900	2739100	905000	2774400	1054100	2087900	4877500	183240	2394300	851360	3045300	806280	883640	625000	1165200	594520	669910	985440
Q99558	Q99558	Mitogen-activated protein kinase kinase kinase 14	MAP3K14	sp|Q99558|M3K14_HUMAN Mitogen-activated protein kinase kinase kinase 14 OS=Homo sapiens OX=9606 GN=MAP3K14 PE=1 SV=2	By MS/MS	By MS/MS	By MS/MS	By MS/MS	By MS/MS	By MS/MS	By MS/MS	By MS/MS	By MS/MS	By MS/MS	By MS/MS	By MS/MS	By MS/MS	By MS/MS	By MS/MS	By MS/MS	By MS/MS	By MS/MS	27983000	2699700	2215100	1334200	1153900	1060300	1657900	2102900	911050	1562800	959010	2502100	1247400	901140	1078300	1877500	1424000	1834000	1461500
O75390	O75390	Citrate synthase, mitochondrial	CS	sp|O75390|CISY_HUMAN Citrate synthase, mitochondrial OS=Homo sapiens OX=9606 GN=CS PE=1 SV=2	By MS/MS	By matching	By MS/MS	By matching	By MS/MS	By matching	By matching	By matching	By MS/MS	By matching	By MS/MS	By matching	By matching	By MS/MS	By matching	By matching	By MS/MS	By matching	27976000	3520600	1792800	2762800	1094300	2873600	204790	1068800	160570	2622300	1841000	1680400	772960	61872	1500200	1569200	172650	2760600	1516500
Q00059	Q00059	Transcription factor A, mitochondrial	TFAM	sp|Q00059|TFAM_HUMAN Transcription factor A, mitochondrial OS=Homo sapiens OX=9606 GN=TFAM PE=1 SV=1	By MS/MS	By MS/MS	None	By matching	By MS/MS	By MS/MS	By MS/MS	By MS/MS	By MS/MS	By MS/MS	By MS/MS	By matching	By matching	By matching	By MS/MS	By matching	By MS/MS	By matching	27783000	3847600	1360500	0	703310	2061200	794170	1335100	644460	3640200	1177900	3656000	1425000	360340	650280	1119400	1280600	3048500	678030
P55072	P55072	Transitional endoplasmic reticulum ATPase	VCP	sp|P55072|TERA_HUMAN Transitional endoplasmic reticulum ATPase OS=Homo sapiens OX=9606 GN=VCP PE=1 SV=4	By matching	By matching	By MS/MS	By MS/MS	By MS/MS	By MS/MS	By MS/MS	By matching	By MS/MS	By MS/MS	By matching	By matching	By MS/MS	By MS/MS	By MS/MS	By matching	By MS/MS	By MS/MS	27726000	2645100	879450	2845300	839350	2219100	1294200	2342900	303920	1944100	1193900	962190	947270	275540	2077700	2320100	437960	2742100	1455600
P05026	P05026	Sodium/potassium-transporting ATPase subunit beta-1	ATP1B1	sp|P05026|AT1B1_HUMAN Sodium/potassium-transporting ATPase subunit beta-1 OS=Homo sapiens OX=9606 GN=ATP1B1 PE=1 SV=1	By MS/MS	By matching	By MS/MS	By matching	By MS/MS	By matching	By matching	By matching	By MS/MS	By MS/MS	By matching	By matching	By matching	By matching	By matching	By matching	By matching	By matching	27210000	2848100	1752500	2120600	1021100	1818200	1046800	2500900	1203200	2120600	1068800	1477800	1231500	400130	1206700	2030800	721650	1306900	1333500
O14979	O14979	Heterogeneous nuclear ribonucleoprotein D-like	HNRNPDL	sp|O14979|HNRDL_HUMAN Heterogeneous nuclear ribonucleoprotein D-like OS=Homo sapiens OX=9606 GN=HNRNPDL PE=1 SV=3	By MS/MS	By matching	By MS/MS	By matching	By MS/MS	By matching	By matching	By matching	By MS/MS	By matching	By matching	None	None	None	None	None	By matching	By matching	27099000	3826300	2215900	5034500	901630	2336300	502720	3659100	349510	4957800	733220	1836200	0	0	0	0	0	391340	354880
Q9UQK1	Q9UQK1	Protein phosphatase 1 regulatory subunit 3C	PPP1R3C	sp|Q9UQK1|PPR3C_HUMAN Protein phosphatase 1 regulatory subunit 3C OS=Homo sapiens OX=9606 GN=PPP1R3C PE=1 SV=2	None	None	By MS/MS	None	By matching	None	None	By MS/MS	By MS/MS	By MS/MS	By MS/MS	By MS/MS	By MS/MS	By MS/MS	By MS/MS	By MS/MS	By MS/MS	By MS/MS	27067000	0	0	1428300	0	843690	0	0	1428100	1016100	1157200	6022000	2870300	1297500	2091300	2307900	1651600	1550200	3403200
P35030	P35030	Trypsin-3	PRSS3	sp|P35030|TRY3_HUMAN Trypsin-3 OS=Homo sapiens OX=9606 GN=PRSS3 PE=1 SV=2	By matching	By matching	By matching	By MS/MS	None	By MS/MS	By matching	By MS/MS	None	By MS/MS	By matching	By MS/MS	By MS/MS	By MS/MS	By MS/MS	By MS/MS	By MS/MS	By MS/MS	27061000	1752800	1682100	953430	0	0	1955200	1605200	1364700	0	1765100	1142300	1572100	1727800	2296900	2733100	1952500	2387200	2170600
P31942	P31942	Heterogeneous nuclear ribonucleoprotein H3	HNRNPH3	sp|P31942|HNRH3_HUMAN Heterogeneous nuclear ribonucleoprotein H3 OS=Homo sapiens OX=9606 GN=HNRNPH3 PE=1 SV=2	By MS/MS	By MS/MS	By MS/MS	By matching	By MS/MS	By matching	By MS/MS	By matching	By MS/MS	By matching	By matching	By matching	None	By matching	By matching	None	By matching	By matching	27010000	3978300	2707400	4410700	1183800	2132000	790720	3121800	194080	2589900	1108800	904950	874970	0	440040	489200	0	1203000	880120
P11940;Q4VXU2;Q96DU9;Q9H361;Q13310	P11940;Q4VXU2	Polyadenylate-binding protein 1;Polyadenylate-binding protein 1-like	PABPC1;PABPC1L	sp|P11940|PABP1_HUMAN Polyadenylate-binding protein 1 OS=Homo sapiens OX=9606 GN=PABPC1 PE=1 SV=2;sp|Q4VXU2|PAP1L_HUMAN Polyadenylate-binding protein 1-like OS=Homo sapiens OX=9606 GN=PABPC1L PE=1 SV=1	By MS/MS	By MS/MS	By MS/MS	By MS/MS	By MS/MS	By MS/MS	By MS/MS	By matching	By MS/MS	By matching	By MS/MS	By matching	By MS/MS	By matching	By matching	By matching	By matching	By MS/MS	26824000	2401400	3679600	1492000	2257500	2600700	1493300	2279200	306190	2505700	1060100	1197700	783240	555660	1349700	901260	353720	636220	970590
P09012	P09012	U1 small nuclear ribonucleoprotein A	SNRPA	sp|P09012|SNRPA_HUMAN U1 small nuclear ribonucleoprotein A OS=Homo sapiens OX=9606 GN=SNRPA PE=1 SV=3	By MS/MS	By MS/MS	By matching	By MS/MS	By MS/MS	By MS/MS	By MS/MS	By MS/MS	By matching	By MS/MS	By MS/MS	By matching	By MS/MS	By MS/MS	By MS/MS	By MS/MS	By MS/MS	By MS/MS	26823000	3186800	1011900	947180	2110200	1619400	3782900	1016800	1289400	284780	963850	2639500	1517300	2711800	1304800	2977600	1904000	2180300	2842300
Q13765;E9PAV3	Q13765;E9PAV3	Nascent polypeptide-associated complex subunit alpha;Nascent polypeptide-associated complex subunit alpha, muscle-specific form	NACA	sp|Q13765|NACA_HUMAN Nascent polypeptide-associated complex subunit alpha OS=Homo sapiens OX=9606 GN=NACA PE=1 SV=1;sp|E9PAV3|NACAM_HUMAN Nascent polypeptide-associated complex subunit alpha, muscle-specific form OS=Homo sapiens OX=9606 GN=NACA PE=1 SV=1	None	By matching	By MS/MS	None	By matching	By MS/MS	By matching	None	By matching	None	By matching	By matching	None	By matching	By matching	By matching	By matching	By matching	26770000	0	1411400	2357900	0	2186400	2804700	2461700	0	1818100	0	1048900	1207900	0	2394800	3364000	1499400	2065900	2148400
Q07065	Q07065	Cytoskeleton-associated protein 4	CKAP4	sp|Q07065|CKAP4_HUMAN Cytoskeleton-associated protein 4 OS=Homo sapiens OX=9606 GN=CKAP4 PE=1 SV=2	By MS/MS	By MS/MS	By MS/MS	By MS/MS	By MS/MS	By MS/MS	By MS/MS	By MS/MS	By MS/MS	By MS/MS	By MS/MS	By MS/MS	By matching	By MS/MS	By MS/MS	By matching	By MS/MS	By MS/MS	26741000	3240900	1152500	3311700	910140	2975800	513870	2126800	712830	3371900	1389300	902240	1285200	245640	686070	1899600	194160	1206700	615420
O43852	O43852	Calumenin	CALU	sp|O43852|CALU_HUMAN Calumenin OS=Homo sapiens OX=9606 GN=CALU PE=1 SV=2	By MS/MS	By MS/MS	By MS/MS	By matching	By MS/MS	By matching	By matching	By MS/MS	By MS/MS	By matching	By matching	By matching	By matching	By matching	By matching	By matching	By matching	By matching	26693000	1146200	2289100	3799300	1447300	2587100	360120	2986700	1800200	4602200	574350	517090	451140	133940	929290	2000000	165160	428870	474940
O75897	O75897	Sulfotransferase 1C4	SULT1C4	sp|O75897|ST1C4_HUMAN Sulfotransferase 1C4 OS=Homo sapiens OX=9606 GN=SULT1C4 PE=1 SV=2	By matching	By matching	By matching	None	By matching	By MS/MS	By MS/MS	By matching	By matching	By MS/MS	By matching	None	By matching	By matching	None	By MS/MS	By matching	None	26634000	1597600	2854100	770000	0	1219900	3626300	4061200	947410	2396400	2042900	367280	0	1070100	1906100	0	1369000	2405300	0
P26599;O95758	P26599	Polypyrimidine tract-binding protein 1	PTBP1	sp|P26599|PTBP1_HUMAN Polypyrimidine tract-binding protein 1 OS=Homo sapiens OX=9606 GN=PTBP1 PE=1 SV=2	By MS/MS	By MS/MS	By MS/MS	By MS/MS	By MS/MS	By matching	By MS/MS	By matching	By MS/MS	By MS/MS	By MS/MS	By matching	By matching	By matching	By matching	None	By matching	By matching	26298000	2419000	3449600	5324500	875660	1841300	694810	4278000	638270	1601600	521260	1716400	587470	123970	189200	712190	0	365620	959130
P46087	P46087	Probable 28S rRNA (cytosine(4447)-C(5))-methyltransferase	NOP2	sp|P46087|NOP2_HUMAN 28S rRNA (cytosine(4447)-C(5))-methyltransferase OS=Homo sapiens OX=9606 GN=NOP2 PE=1 SV=2	By MS/MS	By MS/MS	By matching	By MS/MS	By matching	By MS/MS	By MS/MS	By MS/MS	By MS/MS	By matching	By MS/MS	By matching	By matching	By MS/MS	By matching	By MS/MS	By matching	By MS/MS	26287000	1816000	2128400	1057300	1371100	985770	1586500	3391100	1046100	1593300	920310	3282000	1392100	679650	806770	1166500	841440	1071000	1152000
P26885	P26885	Peptidyl-prolyl cis-trans isomerase FKBP2	FKBP2	sp|P26885|FKBP2_HUMAN Peptidyl-prolyl cis-trans isomerase FKBP2 OS=Homo sapiens OX=9606 GN=FKBP2 PE=1 SV=2	By matching	By matching	By MS/MS	None	By MS/MS	None	None	By matching	By MS/MS	By matching	None	None	None	None	None	None	None	None	25447000	4949300	3170600	5021000	0	4070700	0	0	1689700	4957300	1587900	0	0	0	0	0	0	0	0
P27105	P27105	Stomatin	STOM	sp|P27105|STOM_HUMAN Stomatin OS=Homo sapiens OX=9606 GN=STOM PE=1 SV=3	By MS/MS	By MS/MS	By MS/MS	By MS/MS	By MS/MS	By matching	By matching	By matching	By MS/MS	By matching	By matching	By matching	By matching	By matching	By MS/MS	By matching	By matching	By matching	25238000	4143400	1962900	1612400	985220	1367100	998130	2036500	924510	1970600	764260	1842300	1222800	415660	1031300	1459400	465120	1138300	898220
Q99613;B5ME19	Q99613;B5ME19	Eukaryotic translation initiation factor 3 subunit C;Eukaryotic translation initiation factor 3 subunit C-like protein	EIF3C;EIF3CL	sp|Q99613|EIF3C_HUMAN Eukaryotic translation initiation factor 3 subunit C OS=Homo sapiens OX=9606 GN=EIF3C PE=1 SV=1;sp|B5ME19|EIFCL_HUMAN Eukaryotic translation initiation factor 3 subunit C-like protein OS=Homo sapiens OX=9606 GN=EIF3CL PE=1 SV=1	By MS/MS	By MS/MS	By matching	By MS/MS	By MS/MS	By MS/MS	By MS/MS	By matching	By matching	By MS/MS	By MS/MS	By MS/MS	By MS/MS	By MS/MS	By MS/MS	By MS/MS	By MS/MS	By MS/MS	24995000	1703400	1517900	794260	969410	750190	1427600	1807800	1168200	1530800	962300	1797700	1156200	1016300	1819300	2178800	1238000	1286600	1869800
P62841	P62841	Small ribosomal subunit protein uS19	RPS15	sp|P62841|RS15_HUMAN Small ribosomal subunit protein uS19 OS=Homo sapiens OX=9606 GN=RPS15 PE=1 SV=2	By MS/MS	By MS/MS	By MS/MS	By MS/MS	By MS/MS	By MS/MS	By MS/MS	By matching	By MS/MS	By matching	By MS/MS	By matching	By matching	By matching	By matching	None	By matching	By matching	24400000	1875400	2916800	1435300	1703800	1079200	1736000	3001700	1071200	1140600	786160	2472000	1136900	640500	683200	949560	0	810850	960740
Q14108	Q14108	Lysosome membrane protein 2	SCARB2	sp|Q14108|SCRB2_HUMAN Lysosome membrane protein 2 OS=Homo sapiens OX=9606 GN=SCARB2 PE=1 SV=2	By MS/MS	By matching	By MS/MS	By matching	By matching	By matching	By MS/MS	By matching	By matching	By matching	By MS/MS	By matching	By matching	By matching	By matching	By matching	By matching	By matching	24372000	1495000	2480500	3271800	553020	987730	363630	2566000	933730	1783800	1291500	2992300	789160	213390	1084200	1899800	345610	986010	334360
P07900;Q14568;Q58FF6;Q58FG0;Q58FG1	P07900	Heat shock protein HSP 90-alpha	HSP90AA1	sp|P07900|HS90A_HUMAN Heat shock protein HSP 90-alpha OS=Homo sapiens OX=9606 GN=HSP90AA1 PE=1 SV=5	By MS/MS	By matching	By MS/MS	By matching	By MS/MS	By matching	By matching	By matching	By matching	By matching	By matching	By matching	By matching	By MS/MS	By MS/MS	By matching	By MS/MS	By MS/MS	24073000	3206000	1009800	2740600	665600	1819000	734020	1385900	298930	502140	534760	410980	1068500	202720	2506900	1851700	364980	3362000	1408900
Q9Y277	Q9Y277	Voltage-dependent anion-selective channel protein 3	VDAC3	sp|Q9Y277|VDAC3_HUMAN Voltage-dependent anion-selective channel protein 3 OS=Homo sapiens OX=9606 GN=VDAC3 PE=1 SV=1	None	By matching	By matching	By matching	By MS/MS	None	By matching	By matching	By matching	By MS/MS	By matching	By matching	None	By matching	By matching	None	By matching	By matching	24050000	0	1272700	2102100	1050500	2430700	0	2061100	1483900	2606900	1964800	1334500	1369800	0	1355300	2792300	0	1002200	1222900
Q9NYP7	Q9NYP7	Very long chain fatty acid elongase 5	ELOVL5	sp|Q9NYP7|ELOV5_HUMAN Very long chain fatty acid elongase 5 OS=Homo sapiens OX=9606 GN=ELOVL5 PE=1 SV=1	None	By matching	By MS/MS	By matching	None	By matching	None	By matching	By matching	By matching	None	By matching	By matching	By matching	None	By matching	None	By matching	23751000	0	2755400	3071700	1733400	0	1220200	0	1871100	4065900	1884300	0	2596000	595510	1311500	0	592030	0	2054200
P01889;P17693;P13747;P01893;P04439	P01889;P17693;P13747;P01893;P04439	HLA class I histocompatibility antigen, B alpha chain;HLA class I histocompatibility antigen, alpha chain G;Soluble HLA class I histocompatibility antigen, alpha chain G;HLA class I histocompatibility antigen, alpha chain E;Soluble HLA class I histocompatibility antigen, alpha chain E;Putative HLA class I histocompatibility antigen, alpha chain H;HLA class I histocompatibility antigen, A alpha ch…	HLA-B;HLA-G;HLA-E;HLA-H;HLA-A	sp|P01889|HLAB_HUMAN HLA class I histocompatibility antigen, B alpha chain OS=Homo sapiens OX=9606 GN=HLA-B PE=1 SV=3;sp|P17693|HLAG_HUMAN HLA class I histocompatibility antigen, alpha chain G OS=Homo sapiens OX=9606 GN=HLA-G PE=1 SV=1;sp|P13747|HLAE_HUMAN	By MS/MS	By matching	By MS/MS	By matching	By matching	By matching	By matching	By matching	By MS/MS	By matching	None	By matching	None	By matching	By matching	None	By matching	By matching	23463000	3662500	1731400	3160400	588620	1011800	985840	2755500	525340	1289100	832150	0	496130	0	480030	2484800	0	2058500	1400300
P31947;P27348;Q04917	P31947	14-3-3 protein sigma	SFN	sp|P31947|1433S_HUMAN 14-3-3 protein sigma OS=Homo sapiens OX=9606 GN=SFN PE=1 SV=1	By MS/MS	By matching	By MS/MS	By matching	By matching	By matching	By matching	By matching	By matching	By MS/MS	By matching	By MS/MS	By matching	By matching	By MS/MS	By matching	By matching	By MS/MS	23462000	1085400	2008200	2617700	1129400	1439300	1515500	2609600	304100	270490	328960	1197200	1042800	767360	1157000	1784400	831480	1785500	1587400
Q9H6F5	Q9H6F5	Coiled-coil domain-containing protein 86	CCDC86	sp|Q9H6F5|CCD86_HUMAN Coiled-coil domain-containing protein 86 OS=Homo sapiens OX=9606 GN=CCDC86 PE=1 SV=1	By MS/MS	By MS/MS	By matching	By matching	By matching	By matching	By MS/MS	By matching	By matching	By matching	By MS/MS	By matching	None	By matching	None	None	None	By matching	23227000	2052100	2865300	455580	1865000	540350	1413500	3817200	660620	2864700	119450	5851600	438030	0	171080	0	0	0	232070
Q9NQ55	Q9NQ55	Suppressor of SWI4 1 homolog	PPAN	sp|Q9NQ55|SSF1_HUMAN Suppressor of SWI4 1 homolog OS=Homo sapiens OX=9606 GN=PPAN PE=1 SV=1	By matching	By matching	None	By matching	None	By matching	By MS/MS	None	By MS/MS	By matching	By MS/MS	None	By matching	None	None	None	None	None	22442000	2333500	2821800	0	1917900	0	1232100	5007600	0	3751600	565340	4251100	0	561160	0	0	0	0	0
P35269	P35269	General transcription factor IIF subunit 1	GTF2F1	sp|P35269|T2FA_HUMAN General transcription factor IIF subunit 1 OS=Homo sapiens OX=9606 GN=GTF2F1 PE=1 SV=2	By matching	By MS/MS	By matching	By MS/MS	By matching	By MS/MS	By MS/MS	By matching	By MS/MS	None	By MS/MS	By matching	By matching	By matching	By matching	By matching	By matching	By matching	22233000	1156900	2836100	1051800	880620	949930	1726200	3464100	564260	1318200	0	4246200	879510	434400	298390	712670	420180	405390	1186100
O00592	O00592	Podocalyxin	PODXL	sp|O00592|PODXL_HUMAN Podocalyxin OS=Homo sapiens OX=9606 GN=PODXL PE=1 SV=2	By MS/MS	By MS/MS	By MS/MS	By MS/MS	By MS/MS	By MS/MS	By MS/MS	By MS/MS	By MS/MS	By MS/MS	By matching	By MS/MS	By matching	By MS/MS	By MS/MS	By MS/MS	By MS/MS	By MS/MS	21912000	2163300	1548500	1475700	598280	1249200	880630	1611000	885260	1464800	1037800	1018200	1142500	594820	1281800	1971100	550670	1390500	1047800
P05114	P05114	Non-histone chromosomal protein HMG-14	HMGN1	sp|P05114|HMGN1_HUMAN Non-histone chromosomal protein HMG-14 OS=Homo sapiens OX=9606 GN=HMGN1 PE=1 SV=3	None	None	By MS/MS	By MS/MS	By matching	By matching	By matching	By matching	By MS/MS	By matching	By MS/MS	By matching	None	By matching	None	By matching	None	None	21887000	0	0	2073500	2316900	595870	799880	2275500	1318300	457660	414790	9898100	1278000	0	233800	0	224610	0	0
Q9HCN8	Q9HCN8	Stromal cell-derived factor 2-like protein 1	SDF2L1	sp|Q9HCN8|SDF2L_HUMAN Stromal cell-derived factor 2-like protein 1 OS=Homo sapiens OX=9606 GN=SDF2L1 PE=1 SV=2	By matching	None	None	None	By matching	By matching	By matching	By matching	By matching	None	None	None	By matching	None	By MS/MS	By matching	By matching	By matching	21678000	2202400	0	0	0	944920	1829600	2270000	1894800	1507300	0	0	0	2175300	0	3580700	1732500	2243600	1297000
Q9BUF5;A6NNZ2;CON__ENSEMBL:ENSBTAP00000025008;Q9H4B7	Q9BUF5	Tubulin beta-6 chain	TUBB6	sp|Q9BUF5|TBB6_HUMAN Tubulin beta-6 chain OS=Homo sapiens OX=9606 GN=TUBB6 PE=1 SV=1	By MS/MS	By matching	By MS/MS	By matching	By MS/MS	By MS/MS	By matching	By matching	By matching	By MS/MS	By matching	By matching	By matching	By MS/MS	By MS/MS	By matching	By MS/MS	By MS/MS	21671000	4173300	1295200	1971800	816800	1185300	921310	992340	441050	1414700	565710	935290	807890	239520	981950	1359600	439130	2171700	958680
O15173	O15173	Membrane-associated progesterone receptor component 2	PGRMC2	sp|O15173|PGRC2_HUMAN Membrane-associated progesterone receptor component 2 OS=Homo sapiens OX=9606 GN=PGRMC2 PE=1 SV=1	By matching	By matching	By MS/MS	By matching	By matching	By matching	By matching	By matching	By matching	By matching	By matching	None	None	By matching	By matching	By matching	By matching	By matching	21483000	2082100	1579200	3014800	1100300	1154800	1063300	1261800	1153100	1165900	1000800	977180	0	0	1294100	1896800	554590	1212900	971420
P60174	P60174	Triosephosphate isomerase	TPI1	sp|P60174|TPIS_HUMAN Triosephosphate isomerase OS=Homo sapiens OX=9606 GN=TPI1 PE=1 SV=4	By MS/MS	By matching	By MS/MS	By matching	By matching	By matching	By matching	By matching	By MS/MS	By matching	By matching	By matching	By matching	By matching	By matching	None	By matching	By matching	21297000	3022400	1750400	3401000	140500	3293200	167460	311430	209960	1998800	210430	214340	1195600	92783	1161900	1912200	0	1846800	1715200
P62491;Q15907	P62491;Q15907	Ras-related protein Rab-11A;Ras-related protein Rab-11B	RAB11A;RAB11B	sp|P62491|RB11A_HUMAN Ras-related protein Rab-11A OS=Homo sapiens OX=9606 GN=RAB11A PE=1 SV=3;sp|Q15907|RB11B_HUMAN Ras-related protein Rab-11B OS=Homo sapiens OX=9606 GN=RAB11B PE=1 SV=4	By matching	By matching	By MS/MS	By matching	By matching	By matching	By MS/MS	By matching	By matching	By matching	By matching	None	None	By matching	By matching	By matching	By matching	By matching	21232000	3631500	1042600	2588800	722520	1295900	958720	2028300	815300	1564800	872800	968020	0	0	665840	1473200	421290	1480000	702440
P02786	P02786	Transferrin receptor protein 1;Transferrin receptor protein 1, serum form	TFRC	sp|P02786|TFR1_HUMAN Transferrin receptor protein 1 OS=Homo sapiens OX=9606 GN=TFRC PE=1 SV=2	By MS/MS	By matching	By MS/MS	By matching	By matching	By matching	By matching	By MS/MS	By MS/MS	By matching	By matching	By matching	By matching	By matching	By matching	By matching	By matching	By matching	21087000	3191800	936180	2259900	577070	1823900	514200	2219300	994370	1279100	1122700	667360	763250	216050	767810	1519000	388290	841950	1004400
Q15365	Q15365	Poly(rC)-binding protein 1	PCBP1	sp|Q15365|PCBP1_HUMAN Poly(rC)-binding protein 1 OS=Homo sapiens OX=9606 GN=PCBP1 PE=1 SV=2	By matching	By matching	By MS/MS	By matching	By matching	By matching	By matching	By matching	By matching	By matching	By matching	By matching	By matching	By matching	By matching	By matching	By matching	By matching	21052000	2519400	1414900	2729900	865990	901980	1174000	1910800	701200	945850	566710	1249800	655600	467280	541710	993570	630470	1187300	1595900
P13995	P13995	Bifunctional methylenetetrahydrofolate dehydrogenase/cyclohydrolase, mitochondrial;NAD-dependent methylenetetrahydrofolate dehydrogenase;Methenyltetrahydrofolate cyclohydrolase	MTHFD2	sp|P13995|MTDC_HUMAN Bifunctional methylenetetrahydrofolate dehydrogenase/cyclohydrolase, mitochondrial OS=Homo sapiens OX=9606 GN=MTHFD2 PE=1 SV=2	By matching	By matching	By MS/MS	By MS/MS	By matching	By matching	By matching	By matching	By MS/MS	By matching	By MS/MS	By MS/MS	None	By matching	By matching	None	By matching	By matching	21042000	1659200	1334600	1587100	851780	1523400	712940	1972500	561050	2126000	859200	1807300	988840	0	962970	1682600	0	1432800	979720
P61254	P61254	Large ribosomal subunit protein uL24	RPL26	sp|P61254|RL26_HUMAN Large ribosomal subunit protein uL24 OS=Homo sapiens OX=9606 GN=RPL26 PE=1 SV=1	By MS/MS	By matching	By matching	By matching	By matching	By matching	By matching	By matching	By matching	By matching	By matching	By matching	By matching	By matching	By matching	By matching	By matching	By matching	20692000	840420	0	158620	615710	3176300	11410000	1834200	0	14000	0	277660	0	0	0	0	0	2146900	217810
A6NKL6	A6NKL6	Transmembrane protein 200C	TMEM200C	sp|A6NKL6|T200C_HUMAN Transmembrane protein 200C OS=Homo sapiens OX=9606 GN=TMEM200C PE=1 SV=2	By MS/MS	By MS/MS	By MS/MS	By MS/MS	By MS/MS	By MS/MS	By MS/MS	By MS/MS	By MS/MS	By MS/MS	By MS/MS	By MS/MS	By MS/MS	By MS/MS	By MS/MS	By MS/MS	By MS/MS	By MS/MS	20464000	616450	1211300	400800	727310	814860	1053700	1639100	872360	2027900	921070	2306700	1960700	814870	1294500	905410	1252700	549880	1094800
P31943;P55795;P52597	P31943;P55795	Heterogeneous nuclear ribonucleoprotein H;Heterogeneous nuclear ribonucleoprotein H, N-terminally processed;Heterogeneous nuclear ribonucleoprotein H2;Heterogeneous nuclear ribonucleoprotein H2, N-terminally processed	HNRNPH1;HNRNPH2	sp|P31943|HNRH1_HUMAN Heterogeneous nuclear ribonucleoprotein H OS=Homo sapiens OX=9606 GN=HNRNPH1 PE=1 SV=4;sp|P55795|HNRH2_HUMAN Heterogeneous nuclear ribonucleoprotein H2 OS=Homo sapiens OX=9606 GN=HNRNPH2 PE=1 SV=1	By MS/MS	By matching	By MS/MS	By matching	By MS/MS	By matching	By matching	By matching	By MS/MS	By matching	By matching	By matching	None	By matching	By matching	None	By matching	By matching	20081000	2440400	1570900	3859200	112750	864970	63691	2434500	914350	2593200	608180	167850	724960	0	893750	74445	0	1021700	1736100
Q12907	Q12907	Vesicular integral-membrane protein VIP36	LMAN2	sp|Q12907|LMAN2_HUMAN Vesicular integral-membrane protein VIP36 OS=Homo sapiens OX=9606 GN=LMAN2 PE=1 SV=1	By matching	None	By matching	By matching	By matching	None	By matching	By matching	By matching	None	By matching	By matching	None	By matching	By MS/MS	None	By matching	None	19878000	2490700	0	1311800	893020	1613700	0	2299200	1952400	2317400	0	1197500	978550	0	1224300	2220600	0	1379100	0
O75475	O75475	PC4 and SFRS1-interacting protein	PSIP1	sp|O75475|PSIP1_HUMAN PC4 and SFRS1-interacting protein OS=Homo sapiens OX=9606 GN=PSIP1 PE=1 SV=1	By matching	By MS/MS	By MS/MS	By MS/MS	By matching	By matching	By MS/MS	By matching	By MS/MS	By matching	By MS/MS	By matching	By matching	By matching	None	By matching	By matching	By matching	19803000	1622300	2169900	133090	1717000	1108900	524870	3436900	250480	2433300	188000	5603100	514110	15892	48995	0	85182	69976	128880
P52907;P47755	P52907;P47755	F-actin-capping protein subunit alpha-1;F-actin-capping protein subunit alpha-2	CAPZA1;CAPZA2	sp|P52907|CAZA1_HUMAN F-actin-capping protein subunit alpha-1 OS=Homo sapiens OX=9606 GN=CAPZA1 PE=1 SV=3;sp|P47755|CAZA2_HUMAN F-actin-capping protein subunit alpha-2 OS=Homo sapiens OX=9606 GN=CAPZA2 PE=1 SV=3	By MS/MS	By matching	By MS/MS	By matching	By matching	None	By MS/MS	None	By matching	By matching	By matching	By matching	None	None	None	None	None	By matching	19416000	3393600	1527000	1889100	1425900	786350	0	3323100	0	1859300	820970	2116200	1035800	0	0	0	0	0	1238400
Q9NVJ2;Q96BM9	Q9NVJ2;Q96BM9	ADP-ribosylation factor-like protein 8B;ADP-ribosylation factor-like protein 8A	ARL8B;ARL8A	sp|Q9NVJ2|ARL8B_HUMAN ADP-ribosylation factor-like protein 8B OS=Homo sapiens OX=9606 GN=ARL8B PE=1 SV=1;sp|Q96BM9|ARL8A_HUMAN ADP-ribosylation factor-like protein 8A OS=Homo sapiens OX=9606 GN=ARL8A PE=1 SV=1	By MS/MS	By matching	By MS/MS	None	By MS/MS	By matching	By matching	By matching	By matching	By matching	By matching	By matching	By matching	By matching	By matching	By matching	By matching	By matching	19358000	3243500	1456000	1668100	0	1465400	896590	2027400	510070	1127600	596530	1119900	735600	164460	748950	1315500	452130	1049000	781000
P13639	P13639	Elongation factor 2	EEF2	sp|P13639|EF2_HUMAN Elongation factor 2 OS=Homo sapiens OX=9606 GN=EEF2 PE=1 SV=4	By MS/MS	By MS/MS	By MS/MS	By matching	By MS/MS	By matching	By MS/MS	By matching	By matching	By matching	By matching	By matching	By matching	By matching	By MS/MS	By matching	By MS/MS	By MS/MS	19291000	2774900	1210600	1873300	523270	1419300	936650	850210	464570	1226000	892760	246930	1078800	243380	1037200	1450300	493710	1246100	1322600
Q00610;P53675	Q00610	Clathrin heavy chain 1	CLTC	sp|Q00610|CLH1_HUMAN Clathrin heavy chain 1 OS=Homo sapiens OX=9606 GN=CLTC PE=1 SV=5	By MS/MS	By MS/MS	By MS/MS	By MS/MS	By MS/MS	By matching	By MS/MS	By MS/MS	By MS/MS	By MS/MS	By MS/MS	By matching	By matching	By MS/MS	By MS/MS	By MS/MS	By MS/MS	By MS/MS	19168000	2144800	1176600	2198500	789560	762290	540090	945900	273020	925740	755330	942600	589160	437580	1418300	1309300	647980	2043700	1267500
Q9P2X0	Q9P2X0	Dolichol-phosphate mannosyltransferase subunit 3	DPM3	sp|Q9P2X0|DPM3_HUMAN Dolichol-phosphate mannosyltransferase subunit 3 OS=Homo sapiens OX=9606 GN=DPM3 PE=1 SV=2	By matching	By matching	By MS/MS	None	None	None	None	By matching	By MS/MS	None	None	By matching	By matching	None	By matching	None	By matching	None	19122000	4463300	2210800	3510000	0	0	0	0	1529200	1650200	0	0	1229200	428730	0	2666300	0	1433800	0
Q9H3N1	Q9H3N1	Thioredoxin-related transmembrane protein 1	TMX1	sp|Q9H3N1|TMX1_HUMAN Thioredoxin-related transmembrane protein 1 OS=Homo sapiens OX=9606 GN=TMX1 PE=1 SV=1	By MS/MS	By matching	By MS/MS	By matching	None	By matching	By matching	By matching	By MS/MS	By MS/MS	By matching	By matching	By matching	By matching	By MS/MS	By matching	By matching	By matching	19039000	2653800	1882500	1540100	625320	0	556210	1614300	767810	1256000	854360	892290	745000	325940	983480	1180300	376040	1581400	1204100
Q9UBS4	Q9UBS4	DnaJ homolog subfamily B member 11	DNAJB11	sp|Q9UBS4|DJB11_HUMAN DnaJ homolog subfamily B member 11 OS=Homo sapiens OX=9606 GN=DNAJB11 PE=1 SV=1	By MS/MS	By MS/MS	By MS/MS	By MS/MS	By MS/MS	By matching	By MS/MS	By MS/MS	By MS/MS	By MS/MS	By matching	By matching	By MS/MS	By MS/MS	By MS/MS	By matching	By MS/MS	By matching	18903000	1686800	1242400	1196800	672520	974480	797550	1530200	712790	1377900	830970	1158800	825770	664480	1076600	1695400	608950	1037800	812710
P12814;P35609	P12814;P35609	Alpha-actinin-1;Alpha-actinin-2	ACTN1;ACTN2	sp|P12814|ACTN1_HUMAN Alpha-actinin-1 OS=Homo sapiens OX=9606 GN=ACTN1 PE=1 SV=2;sp|P35609|ACTN2_HUMAN Alpha-actinin-2 OS=Homo sapiens OX=9606 GN=ACTN2 PE=1 SV=1	By MS/MS	By matching	By MS/MS	By matching	By MS/MS	By matching	By MS/MS	By matching	By MS/MS	By matching	By matching	By matching	By matching	By matching	By matching	By matching	By matching	By matching	18595000	1984700	717560	3136600	771420	1238700	744000	1930100	532950	1488900	468930	975120	721060	157660	353880	698700	390880	1081100	1203000
O96008	O96008	Mitochondrial import receptor subunit TOM40 homolog	TOMM40	sp|O96008|TOM40_HUMAN Mitochondrial import receptor subunit TOM40 homolog OS=Homo sapiens OX=9606 GN=TOMM40 PE=1 SV=1	By matching	By matching	By MS/MS	None	By MS/MS	None	By MS/MS	By matching	By matching	None	None	None	By matching	None	None	None	By matching	None	18488000	3953700	1708800	2207500	0	1926500	0	2873000	1006600	3356900	0	0	0	371030	0	0	0	1084400	0
Q9Y2W1	Q9Y2W1	Thyroid hormone receptor-associated protein 3	THRAP3	sp|Q9Y2W1|TR150_HUMAN Thyroid hormone receptor-associated protein 3 OS=Homo sapiens OX=9606 GN=THRAP3 PE=1 SV=2	By MS/MS	By MS/MS	By matching	By MS/MS	By matching	By MS/MS	By MS/MS	By MS/MS	By matching	By MS/MS	By MS/MS	By MS/MS	By MS/MS	By MS/MS	By MS/MS	By MS/MS	By matching	By MS/MS	18134000	1303400	1239300	683210	891690	534560	1302500	1463100	634430	558280	667060	1628400	1055800	759900	1153000	1560300	1035400	676140	987630
Q9Y5B9	Q9Y5B9	FACT complex subunit SPT16	SUPT16H	sp|Q9Y5B9|SP16H_HUMAN FACT complex subunit SPT16 OS=Homo sapiens OX=9606 GN=SUPT16H PE=1 SV=1	By MS/MS	By MS/MS	By MS/MS	By MS/MS	By MS/MS	By MS/MS	By MS/MS	By MS/MS	By MS/MS	By MS/MS	By MS/MS	By MS/MS	By MS/MS	By MS/MS	By MS/MS	By MS/MS	By MS/MS	By MS/MS	18050000	1916600	1064400	1015800	1101800	726470	947820	1485200	567710	936110	676700	1633100	840650	382530	1054000	1396300	527650	904710	872670
O00299	O00299	Chloride intracellular channel protein 1	CLIC1	sp|O00299|CLIC1_HUMAN Chloride intracellular channel protein 1 OS=Homo sapiens OX=9606 GN=CLIC1 PE=1 SV=4	By MS/MS	By matching	By MS/MS	By matching	By matching	By matching	None	By matching	By matching	By matching	By matching	By matching	By matching	By matching	None	By matching	By matching	By matching	17634000	2595600	955860	758790	682810	1317800	640100	0	658360	1568600	1378900	642540	909770	323000	1507700	0	1143300	1301300	1250000
Q9Y3A2	Q9Y3A2	Probable U3 small nucleolar RNA-associated protein 11	UTP11	sp|Q9Y3A2|UTP11_HUMAN Probable U3 small nucleolar RNA-associated protein 11 OS=Homo sapiens OX=9606 GN=UTP11 PE=1 SV=2	By matching	By matching	By matching	By matching	By matching	By matching	By matching	By matching	By matching	By matching	By MS/MS	By matching	By matching	By matching	By matching	None	None	By matching	17608000	1562700	2038300	441920	1044600	428900	1062000	3661800	579050	1726700	279780	3141900	538280	275790	259340	320370	0	0	246200
P10619	P10619	Lysosomal protective protein;Lysosomal protective protein 32 kDa chain;Lysosomal protective protein 20 kDa chain	CTSA	sp|P10619|PPGB_HUMAN Lysosomal protective protein OS=Homo sapiens OX=9606 GN=CTSA PE=1 SV=2	By MS/MS	By MS/MS	By MS/MS	By MS/MS	By MS/MS	By matching	By MS/MS	By matching	By MS/MS	By matching	By MS/MS	By matching	By matching	By matching	By matching	By matching	By matching	By matching	17159000	1854100	1554500	793920	1085000	783750	901750	2352500	401690	1348400	412670	2646300	419320	258660	391900	716250	234100	569000	435040
P23526	P23526	Adenosylhomocysteinase	AHCY	sp|P23526|SAHH_HUMAN Adenosylhomocysteinase OS=Homo sapiens OX=9606 GN=AHCY PE=1 SV=4	By MS/MS	By matching	By MS/MS	By matching	By MS/MS	By matching	By matching	By matching	By matching	By matching	By matching	By matching	By matching	By matching	By matching	By matching	By MS/MS	By matching	16920000	1912000	883510	942130	500330	1046200	723320	1233000	664400	806790	552890	752890	910750	304400	1057300	1617800	577650	1476200	959090
Q562R1	Q562R1	Beta-actin-like protein 2	ACTBL2	sp|Q562R1|ACTBL_HUMAN Beta-actin-like protein 2 OS=Homo sapiens OX=9606 GN=ACTBL2 PE=1 SV=2	By matching	By matching	By matching	By matching	By matching	By matching	By matching	By matching	By matching	By matching	By MS/MS	By matching	By matching	By matching	By matching	By matching	By matching	By matching	16899000	0	0	0	0	0	0	0	0	0	0	16899000	0	0	0	0	0	0	0
Q16891	Q16891	MICOS complex subunit MIC60	IMMT	sp|Q16891|MIC60_HUMAN MICOS complex subunit MIC60 OS=Homo sapiens OX=9606 GN=IMMT PE=1 SV=1	By MS/MS	By MS/MS	By MS/MS	By matching	By MS/MS	By matching	By MS/MS	By matching	By MS/MS	By matching	By matching	By matching	By matching	By matching	By matching	By matching	By MS/MS	By MS/MS	16767000	1936700	1478300	1762100	774830	1294000	697560	1689800	281320	1068100	644860	576580	411860	123760	839470	991270	217830	1061000	917420
P00558;P07205	P00558	Phosphoglycerate kinase 1	PGK1	sp|P00558|PGK1_HUMAN Phosphoglycerate kinase 1 OS=Homo sapiens OX=9606 GN=PGK1 PE=1 SV=3	By MS/MS	By matching	By MS/MS	By matching	By MS/MS	By MS/MS	By matching	By matching	By matching	By matching	By matching	By matching	By matching	By matching	By MS/MS	By matching	By matching	By matching	16692000	1209100	1521000	1947100	1075600	1644300	1259200	542580	273340	413000	337000	356370	1531500	124830	1373300	1963300	195340	700100	1694000
P19367	P19367	Hexokinase-1	HK1	sp|P19367|HXK1_HUMAN Hexokinase-1 OS=Homo sapiens OX=9606 GN=HK1 PE=1 SV=3	By MS/MS	By MS/MS	By MS/MS	By matching	By MS/MS	By matching	By MS/MS	By matching	By MS/MS	By MS/MS	By matching	By matching	By matching	By MS/MS	By MS/MS	By matching	By matching	By matching	16556000	1398600	1233000	1949200	636400	769240	505980	1411700	684550	1919600	816640	909950	755140	185420	683030	1117700	192120	530100	857720
Q9HDC9	Q9HDC9	Adipocyte plasma membrane-associated protein	APMAP	sp|Q9HDC9|APMAP_HUMAN Adipocyte plasma membrane-associated protein OS=Homo sapiens OX=9606 GN=APMAP PE=1 SV=2	By matching	By matching	By MS/MS	By matching	By MS/MS	By matching	By MS/MS	By matching	By MS/MS	By matching	By matching	By matching	None	By matching	By MS/MS	By matching	By matching	By matching	16380000	1874000	1184300	1758600	482660	1107000	463350	1206200	828390	1402300	858560	859970	646500	0	551260	1567400	269290	611350	708660
P04181	P04181	Ornithine aminotransferase, mitochondrial;Ornithine aminotransferase, hepatic form;Ornithine aminotransferase, renal form	OAT	sp|P04181|OAT_HUMAN Ornithine aminotransferase, mitochondrial OS=Homo sapiens OX=9606 GN=OAT PE=1 SV=1	By MS/MS	By matching	By MS/MS	By matching	By MS/MS	By matching	By matching	None	By matching	By matching	None	By matching	None	By MS/MS	By matching	None	By matching	By matching	15945000	1668900	443320	1400400	1033700	1829300	466940	1508900	0	2322100	397120	0	488270	0	812880	887960	0	2344100	340770
P11387;Q969P6	P11387	DNA topoisomerase 1	TOP1	sp|P11387|TOP1_HUMAN DNA topoisomerase 1 OS=Homo sapiens OX=9606 GN=TOP1 PE=1 SV=2	By matching	By matching	By MS/MS	By MS/MS	By matching	By matching	By MS/MS	By matching	By MS/MS	By matching	By MS/MS	By matching	By matching	By matching	By matching	By matching	By matching	By matching	15896000	1149600	1360100	623820	765390	732490	642240	2799500	468070	2454600	366600	3107600	520810	199520	70447	293680	48014	93246	270930
P00742	P00742	Coagulation factor X;Factor X light chain;Factor X heavy chain;Activated factor Xa heavy chain	F10	sp|P00742|FA10_HUMAN Coagulation factor X OS=Homo sapiens OX=9606 GN=F10 PE=1 SV=2	None	None	By matching	By matching	None	By matching	By matching	By MS/MS	None	None	None	None	By matching	By MS/MS	By MS/MS	By MS/MS	By MS/MS	By MS/MS	15853000	0	0	453920	744570	0	1272000	519680	804620	0	0	0	0	1157500	2039700	2691500	1362600	3583400	1223100
P61019;Q8WUD1	P61019;Q8WUD1	Ras-related protein Rab-2A;Ras-related protein Rab-2B	RAB2A;RAB2B	sp|P61019|RAB2A_HUMAN Ras-related protein Rab-2A OS=Homo sapiens OX=9606 GN=RAB2A PE=1 SV=1;sp|Q8WUD1|RAB2B_HUMAN Ras-related protein Rab-2B OS=Homo sapiens OX=9606 GN=RAB2B PE=1 SV=1	By MS/MS	By matching	By MS/MS	By matching	By matching	By matching	By matching	By matching	By matching	By matching	By matching	By matching	By matching	By matching	By matching	By matching	By matching	By matching	15732000	1651300	730860	1624200	841560	851250	548480	1411500	555280	1498500	588540	868770	732710	135770	536500	1060300	396810	1024200	675170
P08559	P08559	Pyruvate dehydrogenase E1 component subunit alpha, somatic form, mitochondrial	PDHA1	sp|P08559|ODPA_HUMAN Pyruvate dehydrogenase E1 component subunit alpha, somatic form, mitochondrial OS=Homo sapiens OX=9606 GN=PDHA1 PE=1 SV=3	By MS/MS	By matching	By MS/MS	By matching	By matching	By matching	By matching	By matching	By MS/MS	By matching	By matching	By matching	By matching	By matching	By matching	By matching	By MS/MS	By matching	15658000	2018600	1353300	1597500	516920	1208300	461320	936250	526030	1538900	385080	1371300	367190	257680	475690	675400	285060	1256800	426620
P11166	P11166	Solute carrier family 2, facilitated glucose transporter member 1	SLC2A1	sp|P11166|GTR1_HUMAN Solute carrier family 2, facilitated glucose transporter member 1 OS=Homo sapiens OX=9606 GN=SLC2A1 PE=1 SV=2	By MS/MS	By matching	By MS/MS	None	By MS/MS	By matching	By matching	By MS/MS	By MS/MS	By matching	By matching	None	None	None	By MS/MS	None	By matching	By matching	15590000	2343700	617050	5790900	0	1550100	553200	724260	910420	2328600	643830	349660	0	0	0	1344900	0	1321300	1481500
Q5JTW2	Q5JTW2	Centrosomal protein of 78 kDa	CEP78	sp|Q5JTW2|CEP78_HUMAN Centrosomal protein of 78 kDa OS=Homo sapiens OX=9606 GN=CEP78 PE=1 SV=1	By matching	None	By matching	None	By matching	None	None	By MS/MS	By MS/MS	None	By MS/MS	By MS/MS	By matching	None	None	By MS/MS	None	By MS/MS	15509000	935580	0	550690	0	106000	0	0	3408800	699820	0	1484300	2233000	764450	0	0	3718300	0	1607900
P42704	P42704	Leucine-rich PPR motif-containing protein, mitochondrial	LRPPRC	sp|P42704|LPPRC_HUMAN Leucine-rich PPR motif-containing protein, mitochondrial OS=Homo sapiens OX=9606 GN=LRPPRC PE=1 SV=3	By MS/MS	By matching	By MS/MS	By MS/MS	By MS/MS	By matching	By MS/MS	By matching	By MS/MS	By MS/MS	By matching	By matching	By matching	By MS/MS	By matching	By matching	By MS/MS	By matching	15482000	2307000	1042300	1410000	565960	1076000	406940	1121200	335470	1110800	568030	899280	483820	61141	611840	896740	302170	1778200	504850
P63104	P63104	14-3-3 protein zeta/delta	YWHAZ	sp|P63104|1433Z_HUMAN 14-3-3 protein zeta/delta OS=Homo sapiens OX=9606 GN=YWHAZ PE=1 SV=1	By MS/MS	By matching	By MS/MS	By matching	By matching	By matching	By matching	By matching	By matching	By matching	By matching	By matching	By matching	By matching	By matching	By matching	By matching	By matching	15309000	1580600	891340	3221800	553270	1995700	531430	1350600	0	1767800	522010	731630	0	312310	482750	929700	437700	0	0
P53597	P53597	Succinate--CoA ligase [ADP/GDP-forming] subunit alpha, mitochondrial	SUCLG1	sp|P53597|SUCA_HUMAN Succinate--CoA ligase [ADP/GDP-forming] subunit alpha, mitochondrial OS=Homo sapiens OX=9606 GN=SUCLG1 PE=1 SV=4	By matching	By matching	By MS/MS	None	By matching	None	By MS/MS	None	By MS/MS	By matching	None	None	None	By matching	By matching	None	By MS/MS	None	15140000	1069600	816430	1259200	0	861210	0	3413900	0	218930	457210	0	0	0	2489300	1370600	0	3183400	0
P10515	P10515	Dihydrolipoyllysine-residue acetyltransferase component of pyruvate dehydrogenase complex, mitochondrial	DLAT	sp|P10515|ODP2_HUMAN Dihydrolipoyllysine-residue acetyltransferase component of pyruvate dehydrogenase complex, mitochondrial OS=Homo sapiens OX=9606 GN=DLAT PE=1 SV=3	By MS/MS	By MS/MS	By MS/MS	By matching	By matching	By matching	By matching	By matching	By matching	By matching	By MS/MS	By matching	By matching	None	By MS/MS	By matching	By matching	By matching	14950000	1541000	1083500	1135800	608800	519910	521360	1423600	692840	966340	609340	1147700	666650	447100	0	1347000	577140	939620	721990
Q92979	Q92979	Ribosomal RNA small subunit methyltransferase NEP1	EMG1	sp|Q92979|NEP1_HUMAN Ribosomal RNA small subunit methyltransferase NEP1 OS=Homo sapiens OX=9606 GN=EMG1 PE=1 SV=4	By MS/MS	By MS/MS	By matching	By MS/MS	By matching	By matching	By MS/MS	By matching	By matching	By matching	By MS/MS	By matching	By matching	By matching	By matching	None	None	By matching	14805000	2168800	1885900	710640	1057000	555160	503710	3107900	640440	843830	295210	2002000	404770	159940	159690	144130	0	0	166230
P26038;P35241;P15311	P26038	Moesin	MSN	sp|P26038|MOES_HUMAN Moesin OS=Homo sapiens OX=9606 GN=MSN PE=1 SV=3	By matching	By matching	By MS/MS	By matching	By MS/MS	By matching	By matching	By matching	By matching	By matching	By matching	By matching	By matching	By matching	By matching	By matching	By matching	By matching	14788000	1702300	874310	1462800	665400	1157500	519180	1654800	461230	1446300	474610	778120	543880	259720	394190	739070	268370	616610	769210
Q9P0L0;O95292	Q9P0L0	Vesicle-associated membrane protein-associated protein A	VAPA	sp|Q9P0L0|VAPA_HUMAN Vesicle-associated membrane protein-associated protein A OS=Homo sapiens OX=9606 GN=VAPA PE=1 SV=3	By matching	By matching	By MS/MS	By matching	By matching	By matching	By MS/MS	By matching	By matching	None	By matching	By matching	None	By matching	By matching	None	None	By matching	14767000	3645800	550350	2844700	1495700	1649700	237850	703310	195100	1986800	0	295020	626170	0	144510	216640	0	0	175870
P40227;Q92526	P40227	T-complex protein 1 subunit zeta	CCT6A	sp|P40227|TCPZ_HUMAN T-complex protein 1 subunit zeta OS=Homo sapiens OX=9606 GN=CCT6A PE=1 SV=3	By MS/MS	By matching	By MS/MS	By matching	By matching	By matching	By MS/MS	By matching	By matching	By matching	By matching	By matching	By matching	By matching	By matching	By matching	By MS/MS	By matching	14763000	1304300	705130	818960	643840	722050	454280	1107600	393230	1431900	510560	772180	643390	391150	678420	945920	457820	2029500	752680
Q08211	Q08211	ATP-dependent RNA helicase A	DHX9	sp|Q08211|DHX9_HUMAN ATP-dependent RNA helicase A OS=Homo sapiens OX=9606 GN=DHX9 PE=1 SV=4	By matching	By matching	By MS/MS	By matching	By MS/MS	By matching	By MS/MS	By matching	By MS/MS	By matching	By matching	By matching	By matching	By matching	By matching	By matching	By matching	By matching	14562000	2101500	1656800	1605800	630910	1870300	212250	1767700	285730	1626700	384170	785160	135250	46592	152540	369050	97174	462590	371390
P08574	P08574	Cytochrome c1, heme protein, mitochondrial	CYC1	sp|P08574|CY1_HUMAN Cytochrome c1, heme protein, mitochondrial OS=Homo sapiens OX=9606 GN=CYC1 PE=1 SV=3	By MS/MS	By matching	By MS/MS	By matching	By matching	By matching	By matching	By matching	By matching	By matching	By matching	None	By matching	By matching	By matching	By matching	By MS/MS	By matching	14528000	1794600	1386000	1098300	797250	927340	422780	1180800	564950	1182500	608400	840140	0	151570	663290	1087100	390670	933460	499180
Q14444	Q14444	Caprin-1	CAPRIN1	sp|Q14444|CAPR1_HUMAN Caprin-1 OS=Homo sapiens OX=9606 GN=CAPRIN1 PE=1 SV=2	By matching	By matching	By MS/MS	By MS/MS	By matching	By matching	By matching	By MS/MS	By matching	By MS/MS	By matching	By matching	By MS/MS	By MS/MS	By MS/MS	By MS/MS	By MS/MS	None	14371000	1123300	775040	730150	846900	352930	717360	844810	948500	813810	509200	559050	942230	706120	1070600	1148400	1440200	842640	0
P14866	P14866	Heterogeneous nuclear ribonucleoprotein L	HNRNPL	sp|P14866|HNRPL_HUMAN Heterogeneous nuclear ribonucleoprotein L OS=Homo sapiens OX=9606 GN=HNRNPL PE=1 SV=2	By MS/MS	By MS/MS	By MS/MS	By MS/MS	By MS/MS	By matching	By MS/MS	None	By MS/MS	By matching	By matching	None	None	By matching	None	None	None	By matching	14340000	2188800	1062500	2344100	799310	1181900	635120	2014700	0	2022900	603810	1486400	0	0	539410	0	0	0	860950
Q15005	Q15005	Signal peptidase complex subunit 2	SPCS2	sp|Q15005|SPCS2_HUMAN Signal peptidase complex subunit 2 OS=Homo sapiens OX=9606 GN=SPCS2 PE=1 SV=3	By matching	By matching	By MS/MS	By matching	By MS/MS	None	By matching	By MS/MS	By MS/MS	By matching	By matching	By matching	By matching	By matching	By matching	By matching	By matching	By matching	14103000	2210300	882240	1883500	1992900	1625400	0	1662400	1049100	2179400	1207400	2594600	1263200	271160	2002400	259960	993730	872270	2428300
P06702	P06702	Protein S100-A9	S100A9	sp|P06702|S10A9_HUMAN Protein S100-A9 OS=Homo sapiens OX=9606 GN=S100A9 PE=1 SV=1	By matching	None	By matching	By matching	By matching	None	By matching	By MS/MS	None	By MS/MS	By MS/MS	None	By MS/MS	By matching	None	By matching	By matching	None	14056000	1294500	0	349930	461510	199090	0	366200	4238000	0	688770	2522500	0	2979400	411140	0	895130	555000	0
Q15428	Q15428	Splicing factor 3A subunit 2	SF3A2	sp|Q15428|SF3A2_HUMAN Splicing factor 3A subunit 2 OS=Homo sapiens OX=9606 GN=SF3A2 PE=1 SV=2	By matching	By MS/MS	By matching	None	By MS/MS	By matching	None	By matching	By MS/MS	By MS/MS	By MS/MS	By matching	By matching	None	By matching	None	By matching	None	13960000	1421800	2833200	1828900	0	1188700	137400	0	768820	560900	394480	2195500	460210	1083600	0	621390	0	464910	0
P13984	P13984	General transcription factor IIF subunit 2	GTF2F2	sp|P13984|T2FB_HUMAN General transcription factor IIF subunit 2 OS=Homo sapiens OX=9606 GN=GTF2F2 PE=1 SV=2	By matching	By matching	By MS/MS	By matching	By matching	None	By matching	By matching	By matching	None	By MS/MS	By matching	By matching	None	By matching	None	By matching	By matching	13920000	1154300	1293100	0	1315500	787920	0	2089400	677710	1400400	0	2012200	1088500	423470	0	618780	0	430720	627800
Q9NYF8	Q9NYF8	Bcl-2-associated transcription factor 1	BCLAF1	sp|Q9NYF8|BCLF1_HUMAN Bcl-2-associated transcription factor 1 OS=Homo sapiens OX=9606 GN=BCLAF1 PE=1 SV=2	By matching	By matching	By MS/MS	By matching	By matching	By matching	By matching	By MS/MS	By matching	By matching	By matching	By matching	By MS/MS	By MS/MS	By MS/MS	By matching	By matching	By MS/MS	13877000	1038700	0	326700	707600	0	1190700	0	593840	424730	540220	990470	1031700	803900	1332800	1840600	1172600	879340	1003300
P25205	P25205	DNA replication licensing factor MCM3	MCM3	sp|P25205|MCM3_HUMAN DNA replication licensing factor MCM3 OS=Homo sapiens OX=9606 GN=MCM3 PE=1 SV=3	By MS/MS	By MS/MS	By MS/MS	By MS/MS	By matching	By MS/MS	By matching	By MS/MS	By MS/MS	By matching	By matching	By MS/MS	By MS/MS	By MS/MS	By MS/MS	By MS/MS	By MS/MS	By MS/MS	13873000	863560	968290	382830	496520	492970	891080	1029700	580260	727150	437260	907420	768610	604530	936750	1307500	846330	848140	783930
O00422	O00422	Histone deacetylase complex subunit SAP18	SAP18	sp|O00422|SAP18_HUMAN Histone deacetylase complex subunit SAP18 OS=Homo sapiens OX=9606 GN=SAP18 PE=1 SV=1	By MS/MS	By MS/MS	By MS/MS	By MS/MS	By MS/MS	By MS/MS	By MS/MS	By MS/MS	None	By MS/MS	By MS/MS	By MS/MS	By MS/MS	By matching	By matching	By matching	By MS/MS	By MS/MS	13578000	710540	1451400	458800	824440	430530	965020	2956100	645980	0	289730	1704800	652810	680430	360680	703200	380960	576460	488930
P31431	P31431	Syndecan-4	SDC4	sp|P31431|SDC4_HUMAN Syndecan-4 OS=Homo sapiens OX=9606 GN=SDC4 PE=1 SV=2	By MS/MS	By matching	By matching	By matching	By matching	By matching	By MS/MS	By matching	By MS/MS	By matching	By MS/MS	By matching	By matching	By matching	By matching	By matching	By matching	By matching	13060000	1287900	1233700	418010	419340	382010	704960	1732400	504420	756850	238120	2285400	497380	327030	423570	598160	384210	432750	434080
Q15061	Q15061	WD repeat-containing protein 43	WDR43	sp|Q15061|WDR43_HUMAN WD repeat-containing protein 43 OS=Homo sapiens OX=9606 GN=WDR43 PE=1 SV=3	By MS/MS	By MS/MS	By MS/MS	By MS/MS	None	By MS/MS	By MS/MS	By matching	By matching	By matching	By MS/MS	By matching	By matching	By matching	By matching	By MS/MS	By matching	By matching	13003000	526220	1436900	536750	1027500	0	952930	1367000	301860	775880	532770	1774900	616420	536550	457650	670160	452980	481080	555450
A6NDB9	A6NDB9	Paralemmin-3	PALM3	sp|A6NDB9|PALM3_HUMAN Paralemmin-3 OS=Homo sapiens OX=9606 GN=PALM3 PE=1 SV=2	None	By matching	By MS/MS	By matching	None	By matching	None	By MS/MS	None	By matching	None	By MS/MS	By matching	By MS/MS	None	None	None	By MS/MS	12843000	0	1556300	1458000	932230	0	787270	0	881360	0	1027700	0	1630300	911140	1873000	0	0	0	1785700
P49257	P49257	Protein ERGIC-53	LMAN1	sp|P49257|LMAN1_HUMAN Protein ERGIC-53 OS=Homo sapiens OX=9606 GN=LMAN1 PE=1 SV=2	By MS/MS	By matching	By MS/MS	By matching	By matching	By matching	By matching	None	By matching	By matching	By matching	By matching	By matching	By matching	By matching	None	By MS/MS	By matching	12773000	1293700	781730	914180	350420	802220	691660	818850	0	1068100	645840	557570	691710	227340	1127100	1318100	0	773860	710490
Q9Y2X3	Q9Y2X3	Nucleolar protein 58	NOP58	sp|Q9Y2X3|NOP58_HUMAN Nucleolar protein 58 OS=Homo sapiens OX=9606 GN=NOP58 PE=1 SV=1	By matching	By matching	By matching	By MS/MS	By matching	By matching	By MS/MS	By matching	By matching	By matching	By MS/MS	By matching	By matching	By matching	By matching	By matching	By matching	By matching	12472000	894830	640670	404400	1122000	761360	382280	2291100	726480	2071300	135280	630400	538350	176350	481470	762910	489700	905140	129300
Q92541	Q92541	RNA polymerase-associated protein RTF1 homolog	RTF1	sp|Q92541|RTF1_HUMAN RNA polymerase-associated protein RTF1 homolog OS=Homo sapiens OX=9606 GN=RTF1 PE=1 SV=4	By matching	By matching	By matching	By matching	By matching	By matching	By matching	By matching	By MS/MS	By matching	By MS/MS	By matching	By matching	By matching	By matching	By matching	None	By matching	12354000	750090	968750	189530	739800	197700	918690	1702200	459400	1463600	359050	2613700	444510	396520	167620	331310	135500	0	516250
Q9UJZ1	Q9UJZ1	Stomatin-like protein 2, mitochondrial	STOML2	sp|Q9UJZ1|STML2_HUMAN Stomatin-like protein 2, mitochondrial OS=Homo sapiens OX=9606 GN=STOML2 PE=1 SV=1	By MS/MS	By matching	By matching	By matching	By matching	By matching	By matching	By matching	By MS/MS	By matching	By matching	By matching	By matching	By matching	By matching	By matching	By matching	By matching	12135000	2231000	484550	1173700	703990	355370	507610	428430	204010	1006300	211240	398900	239170	294970	1069000	536080	447680	1537400	305660
Q9H9Y2	Q9H9Y2	Ribosome production factor 1	RPF1	sp|Q9H9Y2|RPF1_HUMAN Ribosome production factor 1 OS=Homo sapiens OX=9606 GN=RPF1 PE=1 SV=2	By matching	By MS/MS	By matching	By matching	By matching	By matching	By MS/MS	By matching	By MS/MS	By matching	By MS/MS	By matching	By matching	By matching	By matching	By matching	By matching	By matching	12093000	706970	1202600	351200	562410	406290	527660	1058600	544870	1100900	311780	2187500	719250	359110	337170	479890	491960	312860	431980
P42126	P42126	Enoyl-CoA delta isomerase 1, mitochondrial	ECI1	sp|P42126|ECI1_HUMAN Enoyl-CoA delta isomerase 1, mitochondrial OS=Homo sapiens OX=9606 GN=ECI1 PE=1 SV=1	None	None	By MS/MS	None	By MS/MS	None	None	By matching	None	None	By matching	By matching	By matching	None	None	By matching	None	By matching	11596000	0	0	2024600	0	2174600	0	0	1158000	0	0	1425100	1333500	670590	0	0	1210500	0	1599200
O00567	O00567	Nucleolar protein 56	NOP56	sp|O00567|NOP56_HUMAN Nucleolar protein 56 OS=Homo sapiens OX=9606 GN=NOP56 PE=1 SV=4	By matching	By matching	By matching	By MS/MS	By matching	By matching	By MS/MS	By matching	By MS/MS	By MS/MS	By matching	By matching	By matching	By matching	By matching	By matching	By matching	By matching	11159000	1064900	862130	444770	655310	350720	608870	1270900	464450	714490	349830	1152800	538530	347490	529350	599060	284720	456680	464080
Q16531	Q16531	DNA damage-binding protein 1	DDB1	sp|Q16531|DDB1_HUMAN DNA damage-binding protein 1 OS=Homo sapiens OX=9606 GN=DDB1 PE=1 SV=1	By MS/MS	By matching	By matching	By matching	By matching	By MS/MS	By matching	By matching	By matching	By matching	By matching	By matching	By matching	By matching	By MS/MS	By matching	By MS/MS	By matching	10863000	813680	665600	269000	623460	485340	732030	997690	404040	656990	459530	1031500	616070	281300	672850	1120100	361750	340730	330910
P14868	P14868	Aspartate--tRNA ligase, cytoplasmic	DARS1	sp|P14868|SYDC_HUMAN Aspartate--tRNA ligase, cytoplasmic OS=Homo sapiens OX=9606 GN=DARS1 PE=1 SV=2	By MS/MS	By matching	By matching	By matching	By matching	By matching	By MS/MS	By matching	By MS/MS	By matching	By MS/MS	By matching	By matching	By matching	By matching	By matching	By MS/MS	By matching	10500000	494810	395820	241960	802330	536010	299510	1468700	221710	1196300	174780	1576900	250050	412240	535440	416970	598650	634610	243390
P10909	P10909	Clusterin;Clusterin beta chain;Clusterin alpha chain	CLU	sp|P10909|CLUS_HUMAN Clusterin OS=Homo sapiens OX=9606 GN=CLU PE=1 SV=1	None	By MS/MS	By MS/MS	None	By matching	None	By matching	By matching	By matching	By matching	By matching	By matching	By matching	By matching	None	None	None	By matching	10443000	0	858470	882440	0	746690	0	1316500	382780	946330	623790	1723100	690160	339830	1269600	0	0	0	663600
O15355	O15355	Protein phosphatase 1G	PPM1G	sp|O15355|PPM1G_HUMAN Protein phosphatase 1G OS=Homo sapiens OX=9606 GN=PPM1G PE=1 SV=1	By matching	By matching	By matching	By matching	By matching	By matching	By matching	By MS/MS	By matching	By MS/MS	By matching	By matching	By matching	By matching	By matching	By matching	By MS/MS	By MS/MS	10387000	685390	1042800	468340	344220	209580	714390	406110	445260	197530	410440	385810	723720	662560	970380	590670	748690	579560	801380
P05091	P05091	Aldehyde dehydrogenase, mitochondrial	ALDH2	sp|P05091|ALDH2_HUMAN Aldehyde dehydrogenase, mitochondrial OS=Homo sapiens OX=9606 GN=ALDH2 PE=1 SV=2	By MS/MS	By matching	By MS/MS	By matching	By matching	By matching	By matching	By matching	By MS/MS	By matching	By matching	By matching	By matching	By matching	By matching	By matching	By matching	By MS/MS	10259000	1769300	635520	855000	467450	723200	215040	933920	241630	430800	159300	575870	355510	44203	570600	624010	324910	982280	350540
P04075	P04075	Fructose-bisphosphate aldolase A	ALDOA	sp|P04075|ALDOA_HUMAN Fructose-bisphosphate aldolase A OS=Homo sapiens OX=9606 GN=ALDOA PE=1 SV=2	By MS/MS	By matching	By MS/MS	By matching	By matching	By matching	By matching	None	By MS/MS	By matching	By matching	None	By matching	By matching	By matching	By matching	By matching	None	10154000	1630500	801960	992410	638190	709960	540690	774290	0	605150	582460	506950	0	289990	313940	804720	291280	671350	0
O75821	O75821	Eukaryotic translation initiation factor 3 subunit G	EIF3G	sp|O75821|EIF3G_HUMAN Eukaryotic translation initiation factor 3 subunit G OS=Homo sapiens OX=9606 GN=EIF3G PE=1 SV=2	By MS/MS	None	By MS/MS	By matching	None	By matching	By matching	By matching	By MS/MS	By matching	By matching	None	None	None	None	None	None	By MS/MS	10142000	1364800	0	1215700	653250	0	697750	1971600	1001700	1062700	579950	1594500	0	0	0	0	0	0	0
Q12797	Q12797	Aspartyl/asparaginyl beta-hydroxylase	ASPH	sp|Q12797|ASPH_HUMAN Aspartyl/asparaginyl beta-hydroxylase OS=Homo sapiens OX=9606 GN=ASPH PE=1 SV=3	By MS/MS	By MS/MS	By MS/MS	By matching	By MS/MS	By matching	By matching	By matching	By MS/MS	None	By matching	By matching	None	By matching	By MS/MS	None	By MS/MS	By matching	9956800	1045500	721910	828700	322130	769620	338160	730450	433580	1410900	0	475050	450360	0	375250	845410	0	658360	551530
Q9GZU2	Q9GZU2	Paternally-expressed gene 3 protein	PEG3	sp|Q9GZU2|PEG3_HUMAN Paternally-expressed gene 3 protein OS=Homo sapiens OX=9606 GN=PEG3 PE=1 SV=1	By MS/MS	By MS/MS	By matching	By MS/MS	By MS/MS	By MS/MS	By MS/MS	By matching	By MS/MS	By MS/MS	By MS/MS	By MS/MS	By matching	By MS/MS	By MS/MS	By MS/MS	By MS/MS	By matching	9915800	506870	1018500	88610	498460	444150	837790	934550	248940	710870	262520	1119500	441200	244110	433770	598750	537520	392290	597410
P12004	P12004	Proliferating cell nuclear antigen	PCNA	sp|P12004|PCNA_HUMAN Proliferating cell nuclear antigen OS=Homo sapiens OX=9606 GN=PCNA PE=1 SV=1	By matching	By matching	By MS/MS	By matching	By matching	By matching	By matching	By matching	By matching	By matching	By MS/MS	By matching	By matching	By matching	By matching	By matching	By matching	By matching	9670500	900560	484900	1346500	212780	302790	172040	347550	418540	729040	242180	1020000	549870	180850	606310	597540	275360	586400	697230
O76094	O76094	Signal recognition particle subunit SRP72	SRP72	sp|O76094|SRP72_HUMAN Signal recognition particle subunit SRP72 OS=Homo sapiens OX=9606 GN=SRP72 PE=1 SV=3	By MS/MS	By matching	By matching	By MS/MS	By matching	By matching	By matching	None	By MS/MS	By matching	By MS/MS	By matching	By matching	By matching	By matching	By matching	By matching	By matching	9525800	1498100	817950	868110	867510	469270	246930	948150	0	592360	113720	1994400	190780	106270	150750	136990	104730	85251	334570
P25440	P25440	Bromodomain-containing protein 2	BRD2	sp|P25440|BRD2_HUMAN Bromodomain-containing protein 2 OS=Homo sapiens OX=9606 GN=BRD2 PE=1 SV=2	By MS/MS	By MS/MS	By matching	By MS/MS	By MS/MS	By MS/MS	By MS/MS	By matching	By MS/MS	None	By MS/MS	By MS/MS	By MS/MS	By MS/MS	By matching	By matching	By matching	None	9484600	499110	1083700	443480	745180	602750	658310	582640	298970	871150	0	1700200	386850	323820	0	414650	477550	396260	0
P22392;P15531	P22392;P15531	Nucleoside diphosphate kinase B;Nucleoside diphosphate kinase A	NME2;NME1	sp|P22392|NDKB_HUMAN Nucleoside diphosphate kinase B OS=Homo sapiens OX=9606 GN=NME2 PE=1 SV=1;sp|P15531|NDKA_HUMAN Nucleoside diphosphate kinase A OS=Homo sapiens OX=9606 GN=NME1 PE=1 SV=1	By matching	By matching	By MS/MS	By matching	By matching	None	None	By matching	None	By matching	By matching	By matching	By matching	By matching	By matching	None	By matching	None	9386400	1722700	989330	1313100	597190	692010	0	0	586280	0	458670	497690	500550	198700	358020	767200	0	704960	0
Q03135	Q03135	Caveolin-1	CAV1	sp|Q03135|CAV1_HUMAN Caveolin-1 OS=Homo sapiens OX=9606 GN=CAV1 PE=1 SV=4	By MS/MS	By matching	By MS/MS	By MS/MS	By MS/MS	By MS/MS	By MS/MS	By matching	By matching	By matching	None	By MS/MS	By matching	By matching	By matching	By matching	By MS/MS	By matching	9360800	1186600	783390	937500	573190	604960	436940	887920	523790	171200	426620	0	3461900	431380	4684600	834900	2714100	1000400	562020
Q56VL3	Q56VL3	OCIA domain-containing protein 2	OCIAD2	sp|Q56VL3|OCAD2_HUMAN OCIA domain-containing protein 2 OS=Homo sapiens OX=9606 GN=OCIAD2 PE=1 SV=1	By matching	None	By MS/MS	None	By MS/MS	None	By matching	By matching	By matching	By matching	None	None	By matching	None	None	None	None	By matching	9319400	1961600	0	1698800	0	712330	0	1359000	355080	1279300	860380	0	0	569340	0	0	0	0	523590
O94925	O94925	Glutaminase kidney isoform, mitochondrial;Glutaminase kidney isoform, mitochondrial 68 kDa chain;Glutaminase kidney isoform, mitochondrial 65 kDa chain	GLS	sp|O94925|GLSK_HUMAN Glutaminase kidney isoform, mitochondrial OS=Homo sapiens OX=9606 GN=GLS PE=1 SV=1	By MS/MS	By matching	By MS/MS	By matching	By MS/MS	By matching	By matching	By matching	By MS/MS	By matching	By matching	By matching	By matching	By matching	By matching	By matching	By MS/MS	By matching	9114200	1195700	742200	617460	437820	586450	340630	797600	60756	67793	218440	606900	344510	76719	595280	756080	76743	1275100	317990
P20962	P20962	Parathymosin	PTMS	sp|P20962|PTMS_HUMAN Parathymosin OS=Homo sapiens OX=9606 GN=PTMS PE=1 SV=2	None	None	None	None	None	None	None	None	None	None	None	None	None	By MS/MS	None	None	By MS/MS	None	9056500	0	0	0	0	0	0	0	0	0	0	0	0	0	5291800	0	0	3764700	0
Q09666	Q09666	Neuroblast differentiation-associated protein AHNAK	AHNAK	sp|Q09666|AHNK_HUMAN Neuroblast differentiation-associated protein AHNAK OS=Homo sapiens OX=9606 GN=AHNAK PE=1 SV=2	By MS/MS	By MS/MS	By MS/MS	By MS/MS	By MS/MS	By MS/MS	By MS/MS	By MS/MS	By MS/MS	By MS/MS	By matching	By MS/MS	By matching	By matching	By matching	By matching	By matching	By matching	9025600	960770	754350	1250700	427330	957070	319160	1189800	262520	1354600	315860	395630	286430	35908	60895	202150	48185	75563	128720
P11177	P11177	Pyruvate dehydrogenase E1 component subunit beta, mitochondrial	PDHB	sp|P11177|ODPB_HUMAN Pyruvate dehydrogenase E1 component subunit beta, mitochondrial OS=Homo sapiens OX=9606 GN=PDHB PE=1 SV=3	By matching	By matching	By matching	By matching	By MS/MS	By matching	By matching	By matching	By MS/MS	By matching	By matching	None	By matching	By matching	By matching	None	By matching	By matching	8970700	1049000	705500	789560	391200	712300	317830	718370	225400	847120	271090	701560	0	114880	395300	583870	0	931290	216390
Q15008	Q15008	26S proteasome non-ATPase regulatory subunit 6	PSMD6	sp|Q15008|PSMD6_HUMAN 26S proteasome non-ATPase regulatory subunit 6 OS=Homo sapiens OX=9606 GN=PSMD6 PE=1 SV=1	By matching	By matching	By matching	By matching	By matching	By matching	By matching	By matching	By matching	None	By matching	By matching	By matching	By MS/MS	By MS/MS	By matching	By MS/MS	By MS/MS	8829200	821760	497270	379200	376490	388880	451910	599600	267470	483110	0	620510	371470	275590	639730	832730	379470	914220	529730
P98160	P98160	Basement membrane-specific heparan sulfate proteoglycan core protein;Endorepellin;LG3 peptide	HSPG2	sp|P98160|PGBM_HUMAN Basement membrane-specific heparan sulfate proteoglycan core protein OS=Homo sapiens OX=9606 GN=HSPG2 PE=1 SV=4	By matching	By matching	By matching	By MS/MS	By matching	By MS/MS	By MS/MS	By matching	By MS/MS	By matching	By MS/MS	By MS/MS	By MS/MS	By MS/MS	By MS/MS	By MS/MS	By MS/MS	By MS/MS	8763200	99761	265580	39409	200230	113770	436440	534100	167790	191530	166810	638030	401470	547710	1051500	1111800	871060	955750	970430
P13667	P13667	Protein disulfide-isomerase A4	PDIA4	sp|P13667|PDIA4_HUMAN Protein disulfide-isomerase A4 OS=Homo sapiens OX=9606 GN=PDIA4 PE=1 SV=2	By matching	By matching	By MS/MS	By matching	By MS/MS	By matching	By MS/MS	By matching	By MS/MS	By matching	By matching	By matching	By matching	By MS/MS	By MS/MS	By matching	By matching	By matching	8703600	906850	692380	1217500	315860	1053100	190240	517760	136750	578520	202660	129640	137520	104920	831820	971270	136880	302870	276990
P50213	P50213	Isocitrate dehydrogenase [NAD] subunit alpha, mitochondrial	IDH3A	sp|P50213|IDH3A_HUMAN Isocitrate dehydrogenase [NAD] subunit alpha, mitochondrial OS=Homo sapiens OX=9606 GN=IDH3A PE=1 SV=1	By matching	By matching	None	By matching	None	By matching	By matching	None	By matching	None	None	None	None	By matching	By matching	By matching	By MS/MS	By matching	8701300	1924600	1108100	0	408290	0	350970	993090	0	1222900	0	0	0	0	503480	530560	361950	996050	301260
Q8NBS9	Q8NBS9	Thioredoxin domain-containing protein 5	TXNDC5	sp|Q8NBS9|TXND5_HUMAN Thioredoxin domain-containing protein 5 OS=Homo sapiens OX=9606 GN=TXNDC5 PE=1 SV=2	By MS/MS	By matching	By MS/MS	By matching	By MS/MS	By matching	By matching	By matching	By MS/MS	By matching	None	By matching	By matching	By matching	By matching	None	By matching	By matching	8596400	1403200	402480	1087200	435940	938690	194390	884830	418010	602890	361120	0	767300	121240	317870	555240	0	347490	525870
P10321	P10321	HLA class I histocompatibility antigen, C alpha chain	HLA-C	sp|P10321|HLAC_HUMAN HLA class I histocompatibility antigen, C alpha chain OS=Homo sapiens OX=9606 GN=HLA-C PE=1 SV=3	By matching	By matching	By MS/MS	By matching	By matching	None	By matching	By matching	By matching	By matching	By matching	By matching	None	By matching	By matching	None	By matching	By matching	8384000	1203600	592130	843420	404160	558900	0	849160	334840	855240	337220	604070	381700	0	296550	530750	0	262670	329590
Q2NKQ1	Q2NKQ1	Small G protein signaling modulator 1	SGSM1	sp|Q2NKQ1|SGSM1_HUMAN Small G protein signaling modulator 1 OS=Homo sapiens OX=9606 GN=SGSM1 PE=1 SV=2	By matching	By matching	By matching	None	None	By MS/MS	By MS/MS	By matching	By matching	By matching	By matching	By MS/MS	By matching	By MS/MS	By MS/MS	By MS/MS	By MS/MS	By MS/MS	8351200	362590	237930	163440	0	0	430970	217730	412710	280450	371710	563670	888940	262890	774690	1031200	800660	897250	654380
Q5T3U5	Q5T3U5	ATP-binding cassette sub-family C member 10	ABCC10	sp|Q5T3U5|MRP7_HUMAN ATP-binding cassette sub-family C member 10 OS=Homo sapiens OX=9606 GN=ABCC10 PE=1 SV=1	By MS/MS	By MS/MS	By MS/MS	By MS/MS	By MS/MS	By MS/MS	By MS/MS	By MS/MS	By MS/MS	By MS/MS	By MS/MS	By MS/MS	By MS/MS	By MS/MS	By MS/MS	By MS/MS	By MS/MS	By MS/MS	8248500	857980	0	491810	293210	545070	0	0	433560	751810	311760	944240	661680	302400	646590	883920	508960	0	615550
Q8NB90	Q8NB90	ATPase family gene 2 protein homolog A	AFG2A	sp|Q8NB90|AFG2A_HUMAN ATPase family gene 2 protein homolog A OS=Homo sapiens OX=9606 GN=AFG2A PE=1 SV=3	By MS/MS	By MS/MS	By MS/MS	By MS/MS	By MS/MS	By MS/MS	By MS/MS	By MS/MS	By MS/MS	By MS/MS	By MS/MS	By MS/MS	By MS/MS	By MS/MS	By MS/MS	By MS/MS	By MS/MS	By MS/MS	8112200	809840	839800	255080	507790	296600	693450	879970	387180	351670	291080	823300	355050	286730	268540	294250	204660	209360	357880
P19387	P19387	DNA-directed RNA polymerase II subunit RPB3	POLR2C	sp|P19387|RPB3_HUMAN DNA-directed RNA polymerase II subunit RPB3 OS=Homo sapiens OX=9606 GN=POLR2C PE=1 SV=2	By matching	By matching	By matching	By matching	By matching	By matching	By matching	By matching	By matching	By matching	None	By matching	By matching	By MS/MS	By matching	By matching	By matching	By matching	8080700	628990	465600	192420	281290	147560	449670	629270	288220	235660	345900	0	562240	504950	814070	870360	503810	636500	524230
P61981	P61981	14-3-3 protein gamma;14-3-3 protein gamma, N-terminally processed	YWHAG	sp|P61981|1433G_HUMAN 14-3-3 protein gamma OS=Homo sapiens OX=9606 GN=YWHAG PE=1 SV=2	By matching	By matching	By MS/MS	By matching	By matching	By matching	By matching	By matching	By matching	By matching	By matching	By matching	By matching	By matching	By matching	By matching	By matching	By matching	7876600	888680	449030	698250	394180	251310	373760	576640	326590	594340	355960	477630	494910	0	454440	755060	0	341500	444290
Q9Y4L1	Q9Y4L1	Hypoxia up-regulated protein 1	HYOU1	sp|Q9Y4L1|HYOU1_HUMAN Hypoxia up-regulated protein 1 OS=Homo sapiens OX=9606 GN=HYOU1 PE=1 SV=1	By MS/MS	By matching	By MS/MS	By matching	By MS/MS	By matching	By matching	By matching	By MS/MS	By matching	By matching	By matching	By matching	By matching	By matching	By matching	By matching	By matching	7811400	960760	347100	1283800	385660	1031100	150490	100010	301510	442970	456090	325210	196530	160060	397500	380970	132400	372960	386360
P31946	P31946	14-3-3 protein beta/alpha;14-3-3 protein beta/alpha, N-terminally processed	YWHAB	sp|P31946|1433B_HUMAN 14-3-3 protein beta/alpha OS=Homo sapiens OX=9606 GN=YWHAB PE=1 SV=3	By matching	By matching	By MS/MS	By matching	By matching	By matching	By matching	By matching	By matching	By matching	By matching	By matching	By matching	By matching	By matching	By matching	By matching	By matching	7713000	1161300	498570	1360900	386380	745810	444400	811200	310040	538470	371400	228010	0	0	288980	0	0	0	567600
Q16822	Q16822	Phosphoenolpyruvate carboxykinase [GTP], mitochondrial	PCK2	sp|Q16822|PCKGM_HUMAN Phosphoenolpyruvate carboxykinase [GTP], mitochondrial OS=Homo sapiens OX=9606 GN=PCK2 PE=1 SV=4	By MS/MS	By matching	By MS/MS	By matching	By matching	By matching	By matching	By matching	By MS/MS	By matching	By matching	None	None	By matching	By matching	By matching	By matching	None	7477900	990520	410090	644710	293430	627500	334070	771510	139200	952120	286340	237630	0	0	332810	462700	178270	816980	0
P07199	P07199	Major centromere autoantigen B	CENPB	sp|P07199|CENPB_HUMAN Major centromere autoantigen B OS=Homo sapiens OX=9606 GN=CENPB PE=1 SV=2	None	By matching	None	By matching	None	By matching	By matching	None	By MS/MS	None	By matching	By matching	By matching	None	None	By matching	None	None	7343300	0	611490	0	747550	0	639030	1183800	0	875130	0	1429600	694290	523320	0	0	639020	0	0
P49748	P49748	Very long-chain specific acyl-CoA dehydrogenase, mitochondrial	ACADVL	sp|P49748|ACADV_HUMAN Very long-chain specific acyl-CoA dehydrogenase, mitochondrial OS=Homo sapiens OX=9606 GN=ACADVL PE=1 SV=1	By MS/MS	By matching	By MS/MS	By matching	By MS/MS	By matching	By matching	By matching	By MS/MS	By matching	By matching	By matching	By matching	By matching	By matching	By matching	By MS/MS	By matching	7115000	1406000	200390	171800	190770	529450	69215	899320	221910	598910	56895	211850	64223	17751	160150	890370	231010	1053200	141800
P27695	P27695	DNA repair nuclease/redox regulator APEX1;DNA repair nuclease/redox regulator APEX1, mitochondrial	APEX1	sp|P27695|APEX1_HUMAN DNA repair nuclease/redox regulator APEX1 OS=Homo sapiens OX=9606 GN=APEX1 PE=1 SV=2	By MS/MS	By MS/MS	By MS/MS	By MS/MS	By MS/MS	By MS/MS	By MS/MS	By MS/MS	By MS/MS	By MS/MS	By MS/MS	By MS/MS	By MS/MS	By MS/MS	By MS/MS	By MS/MS	By MS/MS	By MS/MS	7044900	773820	680040	864270	355410	744810	249250	863280	3292400	496330	205460	479600	208860	2170400	6930400	372570	2651600	308050	443170
Q8NFJ5	Q8NFJ5	Retinoic acid-induced protein 3	GPRC5A	sp|Q8NFJ5|RAI3_HUMAN Retinoic acid-induced protein 3 OS=Homo sapiens OX=9606 GN=GPRC5A PE=1 SV=2	None	None	None	None	By matching	None	None	None	By MS/MS	None	None	None	None	None	None	None	None	None	6922200	0	0	0	0	2324200	0	0	0	4598000	0	0	0	0	0	0	0	0	0
P49368	P49368	T-complex protein 1 subunit gamma	CCT3	sp|P49368|TCPG_HUMAN T-complex protein 1 subunit gamma OS=Homo sapiens OX=9606 GN=CCT3 PE=1 SV=4	By matching	By matching	By matching	By matching	By matching	By matching	By MS/MS	By matching	By matching	By matching	By matching	By matching	By matching	By matching	By MS/MS	By matching	By MS/MS	By matching	6389300	479020	473580	456320	250930	322420	353940	472970	188570	350440	187980	358710	235380	146310	428830	520770	270900	467380	424820
Q14315	Q14315	Filamin-C	FLNC	sp|Q14315|FLNC_HUMAN Filamin-C OS=Homo sapiens OX=9606 GN=FLNC PE=1 SV=3	By MS/MS	By matching	By MS/MS	By MS/MS	By MS/MS	By MS/MS	By matching	By matching	By MS/MS	By matching	By matching	By matching	By matching	By matching	By matching	By matching	By MS/MS	By matching	6310100	936800	348980	712730	314470	478220	296430	471370	188550	397030	190470	260220	65636	32807	281790	438880	187740	519610	188390
O43169	O43169	Cytochrome b5 type B	CYB5B	sp|O43169|CYB5B_HUMAN Cytochrome b5 type B OS=Homo sapiens OX=9606 GN=CYB5B PE=1 SV=3	None	None	By matching	None	By matching	None	None	By matching	By MS/MS	By matching	By matching	None	None	By matching	None	None	By matching	By matching	6196500	0	0	1029200	0	1093600	0	0	456760	783050	610970	576240	0	0	351870	0	0	595650	699220
P62070;P10301	P62070;P10301	Ras-related protein R-Ras2;Ras-related protein R-Ras	RRAS2;RRAS	sp|P62070|RRAS2_HUMAN Ras-related protein R-Ras2 OS=Homo sapiens OX=9606 GN=RRAS2 PE=1 SV=1;sp|P10301|RRAS_HUMAN Ras-related protein R-Ras OS=Homo sapiens OX=9606 GN=RRAS PE=1 SV=1	By matching	By MS/MS	By matching	None	By matching	None	By matching	None	None	By matching	None	None	None	None	None	None	None	By matching	6083600	1367900	617970	1297400	0	955930	0	756830	0	0	519700	0	0	0	0	0	0	0	567810
P55884	P55884	Eukaryotic translation initiation factor 3 subunit B	EIF3B	sp|P55884|EIF3B_HUMAN Eukaryotic translation initiation factor 3 subunit B OS=Homo sapiens OX=9606 GN=EIF3B PE=1 SV=3	By matching	By matching	By matching	By matching	By matching	By matching	By matching	By matching	By MS/MS	By matching	By matching	By matching	By matching	By matching	By matching	By matching	By matching	By matching	5943900	578350	440250	336890	308060	206560	319400	593960	197590	366230	232430	494670	258990	193190	383920	327250	185220	259330	261580
Q9BSJ8	Q9BSJ8	Extended synaptotagmin-1	ESYT1	sp|Q9BSJ8|ESYT1_HUMAN Extended synaptotagmin-1 OS=Homo sapiens OX=9606 GN=ESYT1 PE=1 SV=1	By MS/MS	By matching	By MS/MS	By matching	By MS/MS	By matching	By matching	By matching	By MS/MS	By matching	By matching	By matching	By matching	By matching	By matching	By matching	By MS/MS	By matching	5505500	655410	349230	363710	218240	547780	240230	329790	168640	418990	202300	254640	162630	72758	300440	338290	142280	444330	295780
P11586	P11586	C-1-tetrahydrofolate synthase, cytoplasmic;Methylenetetrahydrofolate dehydrogenase;Methenyltetrahydrofolate cyclohydrolase;Formyltetrahydrofolate synthetase;C-1-tetrahydrofolate synthase, cytoplasmic, N-terminally processed	MTHFD1	sp|P11586|C1TC_HUMAN C-1-tetrahydrofolate synthase, cytoplasmic OS=Homo sapiens OX=9606 GN=MTHFD1 PE=1 SV=4	By MS/MS	By MS/MS	By MS/MS	By matching	By matching	By matching	By matching	By matching	By matching	By matching	By matching	By matching	By matching	By matching	By matching	By matching	By MS/MS	By matching	5345400	800620	418560	468690	222040	336300	149700	293070	167800	287510	169550	166620	190620	64342	263300	405520	158270	508420	274510
P49448;P00367	P49448;P00367	Glutamate dehydrogenase 2, mitochondrial;Glutamate dehydrogenase 1, mitochondrial	GLUD2;GLUD1	sp|P49448|DHE4_HUMAN Glutamate dehydrogenase 2, mitochondrial OS=Homo sapiens OX=9606 GN=GLUD2 PE=1 SV=2;sp|P00367|DHE3_HUMAN Glutamate dehydrogenase 1, mitochondrial OS=Homo sapiens OX=9606 GN=GLUD1 PE=1 SV=2	By matching	By matching	By MS/MS	By matching	By MS/MS	By matching	By matching	By matching	By matching	By matching	By matching	By matching	None	By matching	By matching	By matching	By matching	By matching	5333800	485350	340470	782520	131150	569480	124370	303840	260100	560690	166030	422320	147330	0	119480	346670	88055	230330	255630
Q8TD57	Q8TD57	Dynein axonemal heavy chain 3	DNAH3	sp|Q8TD57|DYH3_HUMAN Dynein axonemal heavy chain 3 OS=Homo sapiens OX=9606 GN=DNAH3 PE=1 SV=1	By MS/MS	By matching	By MS/MS	By MS/MS	By MS/MS	By matching	By matching	By MS/MS	By MS/MS	By MS/MS	By matching	By MS/MS	By MS/MS	By MS/MS	By MS/MS	By MS/MS	By MS/MS	By matching	5290600	612740	130690	438450	205160	124730	56970	122270	286320	533080	261560	133000	451490	140430	350030	703740	199560	440840	99565
Q6DD88	Q6DD88	Atlastin-3	ATL3	sp|Q6DD88|ATLA3_HUMAN Atlastin-3 OS=Homo sapiens OX=9606 GN=ATL3 PE=1 SV=1	By MS/MS	By MS/MS	By MS/MS	By MS/MS	By MS/MS	By matching	By MS/MS	By matching	None	By MS/MS	By matching	By matching	By matching	By matching	By matching	By matching	By MS/MS	By MS/MS	5120100	1118800	399760	641940	140660	195710	233350	369830	162640	0	178090	178330	182810	56726	143350	450880	63667	406360	197120
Q5VUA4	Q5VUA4	Zinc finger protein 318	ZNF318	sp|Q5VUA4|ZN318_HUMAN Zinc finger protein 318 OS=Homo sapiens OX=9606 GN=ZNF318 PE=1 SV=2	By MS/MS	By MS/MS	By MS/MS	By MS/MS	By MS/MS	By matching	By MS/MS	By matching	By MS/MS	By matching	By MS/MS	By matching	By matching	By matching	By matching	By matching	By MS/MS	By matching	4952800	519340	825330	206640	165650	204360	90355	765570	96950	382370	107630	786300	106980	81660	94253	170740	76767	159420	112450
Q96ST2	Q96ST2	Protein IWS1 homolog	IWS1	sp|Q96ST2|IWS1_HUMAN Protein IWS1 homolog OS=Homo sapiens OX=9606 GN=IWS1 PE=1 SV=2	None	By matching	By matching	By matching	By matching	By MS/MS	By matching	By matching	By matching	By matching	By matching	By matching	By matching	By matching	By matching	By matching	By matching	By matching	4866000	0	431520	215950	305450	209090	371400	401370	223340	212970	209510	393630	309190	163430	231200	439130	258530	206890	283380
O60884	O60884	DnaJ homolog subfamily A member 2	DNAJA2	sp|O60884|DNJA2_HUMAN DnaJ homolog subfamily A member 2 OS=Homo sapiens OX=9606 GN=DNAJA2 PE=1 SV=1	By matching	By MS/MS	By MS/MS	By matching	By matching	By matching	By matching	By matching	By matching	By matching	By matching	By matching	By MS/MS	By MS/MS	By MS/MS	By MS/MS	By MS/MS	By MS/MS	4688700	322930	375640	124640	155060	121590	266180	364750	105980	5279.5	115880	332270	476960	267730	364250	441930	324890	388760	240000
A8MPP1;Q92771;Q96FC9	A8MPP1;Q92771;Q96FC9	Putative ATP-dependent RNA helicase DDX11-like protein 8;Putative ATP-dependent RNA helicase DDX12;ATP-dependent DNA helicase DDX11	DDX11L8;DDX12P;DDX11	sp|A8MPP1|D11L8_HUMAN Putative ATP-dependent DNA helicase DDX11-like protein 8 OS=Homo sapiens OX=9606 GN=DDX11L8 PE=1 SV=1;sp|Q92771|DDX12_HUMAN Putative ATP-dependent DNA helicase DDX12 OS=Homo sapiens OX=9606 GN=DDX12P PE=5 SV=3;sp|Q96FC9|DDX11_HUMAN AT	By MS/MS	By matching	By MS/MS	By matching	By MS/MS	By matching	By matching	By MS/MS	By MS/MS	By MS/MS	By matching	By MS/MS	By matching	By MS/MS	By MS/MS	By matching	By MS/MS	By MS/MS	4508700	418870	296790	322680	80597	303650	131790	248120	227410	184300	168230	207190	266710	173800	259760	572470	125770	291600	228930
Q15149	Q15149	Plectin	PLEC	sp|Q15149|PLEC_HUMAN Plectin OS=Homo sapiens OX=9606 GN=PLEC PE=1 SV=3	By MS/MS	By MS/MS	By MS/MS	By MS/MS	By MS/MS	By matching	By MS/MS	By MS/MS	By MS/MS	By MS/MS	By matching	By matching	By matching	By MS/MS	By matching	By matching	By MS/MS	By MS/MS	4406000	627930	361980	410500	166810	293900	143080	478280	104870	370540	154290	286630	131490	21400	128820	137030	56877	348940	182590
Q5T5P2	Q5T5P2	Sickle tail protein homolog	KIAA1217	sp|Q5T5P2|SKT_HUMAN Sickle tail protein homolog OS=Homo sapiens OX=9606 GN=KIAA1217 PE=1 SV=2	By matching	None	None	None	None	By MS/MS	By MS/MS	By MS/MS	By MS/MS	By MS/MS	None	None	None	By MS/MS	By MS/MS	By MS/MS	None	By MS/MS	4348300	166040	0	0	0	0	501430	492940	373430	681450	496250	0	0	0	322110	602000	403930	0	308700
Q9UKV3	Q9UKV3	Apoptotic chromatin condensation inducer in the nucleus	ACIN1	sp|Q9UKV3|ACINU_HUMAN Apoptotic chromatin condensation inducer in the nucleus OS=Homo sapiens OX=9606 GN=ACIN1 PE=1 SV=2	By matching	By matching	By matching	By matching	By matching	By matching	By matching	By matching	By matching	By matching	By MS/MS	By matching	By matching	By matching	By matching	By matching	By matching	By matching	4251700	302200	367760	91573	241700	161940	283900	410350	176600	292280	106030	510260	219970	173440	169410	236880	166220	158550	182650
Q15393	Q15393	Splicing factor 3B subunit 3	SF3B3	sp|Q15393|SF3B3_HUMAN Splicing factor 3B subunit 3 OS=Homo sapiens OX=9606 GN=SF3B3 PE=1 SV=4	By MS/MS	By matching	By matching	By MS/MS	None	By MS/MS	None	None	By MS/MS	None	None	By MS/MS	By matching	By MS/MS	By matching	None	By matching	None	4221800	620090	314470	480680	470450	0	213120	0	0	294850	0	0	353090	262520	412630	431600	0	368300	0
Q96BK5	Q96BK5	PIN2/TERF1-interacting telomerase inhibitor 1	PINX1	sp|Q96BK5|PINX1_HUMAN PIN2/TERF1-interacting telomerase inhibitor 1 OS=Homo sapiens OX=9606 GN=PINX1 PE=1 SV=2	By matching	By matching	By matching	By matching	By matching	By matching	By MS/MS	By matching	By MS/MS	None	By MS/MS	None	None	None	None	None	None	None	4004900	437760	618300	264110	250170	115590	234720	964030	172060	185150	0	763030	0	0	0	0	0	0	0
Q15459	Q15459	Splicing factor 3A subunit 1	SF3A1	sp|Q15459|SF3A1_HUMAN Splicing factor 3A subunit 1 OS=Homo sapiens OX=9606 GN=SF3A1 PE=1 SV=1	By matching	By matching	By matching	By matching	By matching	By MS/MS	By MS/MS	By matching	By matching	By matching	By MS/MS	By matching	By matching	None	By matching	By matching	By matching	By matching	3963200	638420	787920	389870	1180000	335220	427000	723860	153900	512600	175690	561490	208080	159480	0	217390	115010	152880	233930
P43243	P43243	Matrin-3	MATR3	sp|P43243|MATR3_HUMAN Matrin-3 OS=Homo sapiens OX=9606 GN=MATR3 PE=1 SV=2	By matching	By matching	By MS/MS	By matching	By matching	By matching	By matching	By matching	By matching	By matching	By matching	By matching	By matching	By matching	By matching	By matching	By matching	By matching	3840400	410790	335330	500510	189920	174790	178480	495030	158220	101740	125830	272400	165530	75898	173970	135690	63187	181410	164900
Q96CN4	Q96CN4	EVI5-like protein	EVI5L	sp|Q96CN4|EVI5L_HUMAN EVI5-like protein OS=Homo sapiens OX=9606 GN=EVI5L PE=1 SV=1	By MS/MS	By matching	By matching	By matching	By matching	By matching	By matching	By matching	By matching	By MS/MS	By matching	By matching	None	By matching	None	By matching	By matching	By matching	3737800	629940	192180	109570	220540	87259	199270	326430	100600	121570	197720	362980	244620	0	246840	0	136970	339390	221950
O60282;P33176	O60282;P33176	Kinesin heavy chain isoform 5C;Kinesin-1 heavy chain	KIF5C;KIF5B	sp|O60282|KIF5C_HUMAN Kinesin heavy chain isoform 5C OS=Homo sapiens OX=9606 GN=KIF5C PE=1 SV=1;sp|P33176|KINH_HUMAN Kinesin-1 heavy chain OS=Homo sapiens OX=9606 GN=KIF5B PE=1 SV=1	By matching	By matching	None	By matching	None	By matching	By MS/MS	None	By MS/MS	None	By MS/MS	By MS/MS	None	None	None	By matching	By matching	None	3730500	299800	253870	0	196120	0	243190	493780	0	426930	0	1016100	429220	0	0	0	243000	128500	0
Q8N9W4	Q8N9W4	Golgin subfamily A member 6-like protein 2	GOLGA6L2	sp|Q8N9W4|GG6L2_HUMAN Golgin subfamily A member 6-like protein 2 OS=Homo sapiens OX=9606 GN=GOLGA6L2 PE=1 SV=3	By MS/MS	By matching	By matching	By matching	By matching	By matching	By matching	By matching	By matching	By matching	By MS/MS	By MS/MS	By matching	By MS/MS	None	By MS/MS	By matching	None	3633700	283650	150370	44573	164260	45728	229280	320520	149730	16444	59688	565150	495650	108620	236990	0	374040	388990	0
O43402	O43402	ER membrane protein complex subunit 8	EMC8	sp|O43402|EMC8_HUMAN ER membrane protein complex subunit 8 OS=Homo sapiens OX=9606 GN=EMC8 PE=1 SV=1	None	None	By matching	None	None	None	By matching	None	None	None	By matching	By matching	None	By MS/MS	None	By matching	None	None	3596800	0	0	416140	0	0	0	959550	0	0	0	705660	234200	0	607620	0	673670	0	0
P54886	P54886	Delta-1-pyrroline-5-carboxylate synthase;Glutamate 5-kinase;Gamma-glutamyl phosphate reductase	ALDH18A1	sp|P54886|P5CS_HUMAN Delta-1-pyrroline-5-carboxylate synthase OS=Homo sapiens OX=9606 GN=ALDH18A1 PE=1 SV=2	By matching	By matching	By matching	By matching	By matching	None	By matching	None	By matching	By matching	By matching	None	None	By matching	By matching	By matching	By MS/MS	None	3400100	365900	217190	279560	165280	361140	0	287220	0	341810	121160	281410	0	0	161940	321590	114120	381810	0
Q9P2E3	Q9P2E3	NFX1-type zinc finger-containing protein 1	ZNFX1	sp|Q9P2E3|ZNFX1_HUMAN NFX1-type zinc finger-containing protein 1 OS=Homo sapiens OX=9606 GN=ZNFX1 PE=1 SV=2	By MS/MS	By matching	By matching	By matching	By matching	By matching	By MS/MS	By matching	By MS/MS	By matching	By MS/MS	By MS/MS	By matching	By matching	By MS/MS	By MS/MS	By MS/MS	By matching	3392800	328380	162980	39132	104740	45864	145780	266430	76259	153270	55665	400570	230250	83850	144530	464710	246890	322670	120830
Q9H307	Q9H307	Pinin	PNN	sp|Q9H307|PININ_HUMAN Pinin OS=Homo sapiens OX=9606 GN=PNN PE=1 SV=5	By MS/MS	By MS/MS	By MS/MS	By MS/MS	By MS/MS	By MS/MS	By MS/MS	By MS/MS	By MS/MS	By MS/MS	By MS/MS	By MS/MS	By MS/MS	By MS/MS	By MS/MS	By MS/MS	By MS/MS	By MS/MS	3190400	356700	344950	189910	167340	169420	261900	2840500	214100	117590	124010	497680	1572300	141830	96662	127300	81103	132490	167470
P16112	P16112	Aggrecan core protein;Aggrecan core protein 2	ACAN	sp|P16112|PGCA_HUMAN Aggrecan core protein OS=Homo sapiens OX=9606 GN=ACAN PE=1 SV=3	None	None	None	None	None	None	By matching	None	None	By matching	None	By matching	By matching	By MS/MS	By MS/MS	By MS/MS	By MS/MS	By matching	3123900	0	0	0	0	0	0	69099	0	0	113780	0	304580	213300	507520	604660	437250	574580	299140
P48643	P48643	T-complex protein 1 subunit epsilon	CCT5	sp|P48643|TCPE_HUMAN T-complex protein 1 subunit epsilon OS=Homo sapiens OX=9606 GN=CCT5 PE=1 SV=1	By matching	By matching	By MS/MS	By matching	By matching	By matching	By matching	By matching	By matching	By matching	By matching	By matching	By matching	By matching	By matching	By matching	By matching	By matching	3012600	385560	265030	228800	125240	140730	114130	241870	115410	49745	87812	201570	101860	89296	140540	192670	118660	255700	157950
P62191	P62191	26S proteasome regulatory subunit 4	PSMC1	sp|P62191|PRS4_HUMAN 26S proteasome regulatory subunit 4 OS=Homo sapiens OX=9606 GN=PSMC1 PE=1 SV=1	By matching	By matching	By MS/MS	By matching	By matching	By matching	By matching	By matching	None	By matching	None	By matching	By matching	By matching	By matching	By matching	By matching	None	2852300	402910	270270	280730	115220	165020	141180	238810	105670	0	100250	0	100620	62082	205130	216430	70019	377990	0
Q08357	Q08357	Sodium-dependent phosphate transporter 2	SLC20A2	sp|Q08357|S20A2_HUMAN Sodium-dependent phosphate transporter 2 OS=Homo sapiens OX=9606 GN=SLC20A2 PE=1 SV=1	None	None	None	By matching	None	None	None	None	By matching	None	By MS/MS	By matching	None	By MS/MS	None	None	By matching	None	2812600	0	0	0	35499	0	0	0	0	7456.2	0	2189500	120740	0	349310	0	0	110140	0
Q1KMD3	Q1KMD3	Heterogeneous nuclear ribonucleoprotein U-like protein 2	HNRNPUL2	sp|Q1KMD3|HNRL2_HUMAN Heterogeneous nuclear ribonucleoprotein U-like protein 2 OS=Homo sapiens OX=9606 GN=HNRNPUL2 PE=1 SV=1	By matching	None	By MS/MS	None	By matching	None	None	None	By matching	None	None	None	None	By matching	By matching	None	None	By matching	2803700	676580	0	446990	0	380110	0	0	0	601380	0	0	0	0	250890	271060	0	0	176650
P22314	P22314	Ubiquitin-like modifier-activating enzyme 1	UBA1	sp|P22314|UBA1_HUMAN Ubiquitin-like modifier-activating enzyme 1 OS=Homo sapiens OX=9606 GN=UBA1 PE=1 SV=3	By matching	By matching	By MS/MS	By matching	By matching	By matching	By matching	By matching	By matching	By matching	By matching	By matching	None	By matching	By matching	By matching	By matching	By matching	2646500	370060	176040	265180	134260	129810	103240	118990	76385	141760	113510	136760	148810	0	127470	164120	77256	237020	125810
P11229	P11229	Muscarinic acetylcholine receptor M1	CHRM1	sp|P11229|ACM1_HUMAN Muscarinic acetylcholine receptor M1 OS=Homo sapiens OX=9606 GN=CHRM1 PE=1 SV=2	By matching	None	By matching	None	By matching	None	By MS/MS	None	None	None	By matching	None	None	None	None	None	None	By matching	2363000	508990	0	217690	0	129770	0	760330	0	0	0	667390	0	0	0	0	0	0	78810
Q96GQ7	Q96GQ7	Probable ATP-dependent RNA helicase DDX27	DDX27	sp|Q96GQ7|DDX27_HUMAN Probable ATP-dependent RNA helicase DDX27 OS=Homo sapiens OX=9606 GN=DDX27 PE=1 SV=2	By matching	By MS/MS	By MS/MS	By MS/MS	By MS/MS	By matching	By MS/MS	By matching	None	By matching	By MS/MS	By matching	None	By matching	By matching	By matching	By matching	By matching	2341400	173570	146790	103280	99666	78961	147680	271800	113710	0	57984	235750	165070	0	111080	205710	135340	169040	126020
A4FU69	A4FU69	EF-hand calcium-binding domain-containing protein 5	EFCAB5	sp|A4FU69|EFCB5_HUMAN EF-hand calcium-binding domain-containing protein 5 OS=Homo sapiens OX=9606 GN=EFCAB5 PE=1 SV=3	By MS/MS	By matching	By MS/MS	None	None	By matching	By matching	None	By MS/MS	None	By matching	None	By matching	None	None	None	None	None	2264700	299910	350230	106750	0	0	384060	257460	0	420280	0	297970	0	148030	0	0	0	0	0
Q99715	Q99715	Collagen alpha-1(XII) chain	COL12A1	sp|Q99715|COCA1_HUMAN Collagen alpha-1(XII) chain OS=Homo sapiens OX=9606 GN=COL12A1 PE=1 SV=2	By matching	By matching	By matching	None	By matching	By matching	None	None	By matching	By matching	None	By matching	By MS/MS	By MS/MS	By matching	By MS/MS	By MS/MS	By MS/MS	2141800	123840	35490	34359	0	24200	21238	0	0	19358	22208	0	25136	204760	503700	107060	277910	489030	253520
O95197	O95197	Reticulon-3	RTN3	sp|O95197|RTN3_HUMAN Reticulon-3 OS=Homo sapiens OX=9606 GN=RTN3 PE=1 SV=2	None	None	By MS/MS	None	By matching	None	None	None	None	By matching	By matching	By matching	None	None	By matching	None	None	None	2093900	0	0	352730	0	287540	0	0	0	0	272150	197250	212250	0	0	771960	0	0	0
Q8WXI7	Q8WXI7	Mucin-16	MUC16	sp|Q8WXI7|MUC16_HUMAN Mucin-16 OS=Homo sapiens OX=9606 GN=MUC16 PE=1 SV=3	By MS/MS	By MS/MS	By MS/MS	By MS/MS	None	None	By MS/MS	By MS/MS	By MS/MS	By MS/MS	By MS/MS	By MS/MS	By MS/MS	By MS/MS	By MS/MS	By MS/MS	By MS/MS	By MS/MS	2023200	142710	170790	45198	101790	0	0	184410	77081	130590	56440	292650	127540	71825	112570	143640	146950	104930	114120
Q14004;Q00535;P06493;P24941;P11802;Q00526;Q00534;P50750;Q96Q40;O94921;Q07002;Q00536;Q00537;Q9NYV4	Q14004;Q00535;P06493;P24941;P11802;Q00526;Q00534;P50750;Q96Q40;O94921;Q07002;Q00536;Q00537;Q9NYV4	Cyclin-dependent kinase 13;Cyclin-dependent kinase 5;Cyclin-dependent kinase 1;Cyclin-dependent kinase 2;Cyclin-dependent kinase 4;Cyclin-dependent kinase 3;Cyclin-dependent kinase 6;Cyclin-dependent kinase 9;Cyclin-dependent kinase 15;Cyclin-dependent kinase 14;Cyclin-dependent kinase 18;Cyclin-dependent kinase 16;Cyclin-dependent kinase 17;Cyclin-dependent kinase 12	CDK13;CDK5;CDK1;CDK2;CDK4;CDK3;CDK6;CDK9;CDK15;CDK14;CDK18;CDK16;CDK17;CDK12	sp|Q14004|CDK13_HUMAN Cyclin-dependent kinase 13 OS=Homo sapiens OX=9606 GN=CDK13 PE=1 SV=2;sp|Q00535|CDK5_HUMAN Cyclin-dependent kinase 5 OS=Homo sapiens OX=9606 GN=CDK5 PE=1 SV=3;sp|P06493|CDK1_HUMAN Cyclin-dependent kinase 1 OS=Homo sapiens OX=9606 GN=C	By MS/MS	By MS/MS	By MS/MS	By MS/MS	By matching	By MS/MS	By MS/MS	By matching	By matching	By MS/MS	By MS/MS	By matching	By matching	By MS/MS	By MS/MS	By MS/MS	By matching	By matching	2003600	346390	125980	166270	85845	144100	99116	161780	43629	113300	58627	113160	78338	104770	85454	115680	219010	178080	87890
P05121	P05121	Plasminogen activator inhibitor 1	SERPINE1	sp|P05121|PAI1_HUMAN Plasminogen activator inhibitor 1 OS=Homo sapiens OX=9606 GN=SERPINE1 PE=1 SV=1	By MS/MS	None	None	By MS/MS	By matching	None	None	None	By MS/MS	None	None	By matching	None	None	None	None	None	None	1924700	282200	0	0	743050	187280	0	0	0	194370	0	0	517840	0	0	0	0	0	0
Q9ULE3	Q9ULE3	DENN domain-containing protein 2A	DENND2A	sp|Q9ULE3|DEN2A_HUMAN DENN domain-containing protein 2A OS=Homo sapiens OX=9606 GN=DENND2A PE=1 SV=4	By MS/MS	None	None	None	None	None	None	None	None	None	None	None	None	None	None	None	None	None	1389400	1389400	0	0	0	0	0	0	0	0	0	0	0	0	0	0	0	0	0
Q8WWV6	Q8WWV6	High affinity immunoglobulin alpha and immunoglobulin mu Fc receptor	FCAMR	sp|Q8WWV6|FCAMR_HUMAN High affinity immunoglobulin alpha and immunoglobulin mu Fc receptor OS=Homo sapiens OX=9606 GN=FCAMR PE=1 SV=1	None	None	None	By matching	None	None	None	By matching	None	None	By matching	By matching	None	None	None	By MS/MS	None	None	1375300	0	0	0	77150	0	0	0	68038	0	0	208330	251690	0	0	0	770090	0	0
Q01082	Q01082	Spectrin beta chain, non-erythrocytic 1	SPTBN1	sp|Q01082|SPTB2_HUMAN Spectrin beta chain, non-erythrocytic 1 OS=Homo sapiens OX=9606 GN=SPTBN1 PE=1 SV=2	By matching	By matching	By MS/MS	By matching	By matching	By matching	By matching	By matching	By matching	By matching	By matching	By matching	By matching	None	By matching	None	By matching	By matching	1051600	245370	65047	234650	40482	97608	17188	99742	15571	31244	28635	66332	24000	10684	0	11221	0	55473	8366
O75369	O75369	Filamin-B	FLNB	sp|O75369|FLNB_HUMAN Filamin-B OS=Homo sapiens OX=9606 GN=FLNB PE=1 SV=2	By MS/MS	By matching	By MS/MS	By matching	By matching	By matching	By matching	None	By matching	By matching	By matching	By matching	By matching	By matching	By matching	None	By matching	By matching	1030500	182450	49546	152310	71398	94783	52926	52282	0	100330	55562	24645	74069	12139	82897	82079	0	81675	16982
Q13200	Q13200	26S proteasome non-ATPase regulatory subunit 2	PSMD2	sp|Q13200|PSMD2_HUMAN 26S proteasome non-ATPase regulatory subunit 2 OS=Homo sapiens OX=9606 GN=PSMD2 PE=1 SV=3	By matching	By matching	By MS/MS	None	None	By matching	By matching	None	By matching	By matching	None	None	By matching	By matching	By matching	By matching	By matching	None	1018800	120660	81941	85333	0	0	74737	92444	0	8446.8	27642	0	0	109720	103050	98237	60105	156480	0
Q9P035	Q9P035	Very-long-chain (3R)-3-hydroxyacyl-CoA dehydratase 3	HACD3	sp|Q9P035|HACD3_HUMAN Very-long-chain (3R)-3-hydroxyacyl-CoA dehydratase 3 OS=Homo sapiens OX=9606 GN=HACD3 PE=1 SV=2	None	None	None	None	By MS/MS	None	None	None	None	None	None	None	None	None	None	None	None	None	1010000	0	0	0	0	1010000	0	0	0	0	0	0	0	0	0	0	0	0	0
Q8IYT4	Q8IYT4	Katanin p60 ATPase-containing subunit A-like 2	KATNAL2	sp|Q8IYT4|KATL2_HUMAN Katanin p60 ATPase-containing subunit A-like 2 OS=Homo sapiens OX=9606 GN=KATNAL2 PE=1 SV=3	None	None	By MS/MS	None	None	None	None	None	None	None	None	None	None	None	None	None	None	None	938180	0	0	938180	0	0	0	0	0	0	0	0	0	0	0	0	0	0	0
Q9H9B1	Q9H9B1	Histone-lysine N-methyltransferase EHMT1	EHMT1	sp|Q9H9B1|EHMT1_HUMAN Histone-lysine N-methyltransferase EHMT1 OS=Homo sapiens OX=9606 GN=EHMT1 PE=1 SV=4	None	None	By MS/MS	None	None	None	None	None	None	None	None	None	By MS/MS	None	None	None	By MS/MS	None	589690	0	0	589690	0	0	0	0	0	0	0	0	0	0	0	0	0	0	0
Q8N3T6	Q8N3T6	Transmembrane protein 132C	TMEM132C	sp|Q8N3T6|T132C_HUMAN Transmembrane protein 132C OS=Homo sapiens OX=9606 GN=TMEM132C PE=1 SV=3	None	None	By matching	None	None	None	None	None	None	None	By matching	By MS/MS	None	By matching	By matching	By matching	None	None	523870	0	0	74393	0	0	0	0	0	0	0	69702	82620	0	69808	189990	37352	0	0
Q13099	Q13099	Intraflagellar transport protein 88 homolog	IFT88	sp|Q13099|IFT88_HUMAN Intraflagellar transport protein 88 homolog OS=Homo sapiens OX=9606 GN=IFT88 PE=1 SV=3	None	None	None	None	None	None	None	None	None	None	None	None	None	None	By MS/MS	None	None	None	322810	0	0	0	0	0	0	0	0	0	0	0	0	0	0	322810	0	0	0
O43432	O43432	Eukaryotic translation initiation factor 4 gamma 3	EIF4G3	sp|O43432|IF4G3_HUMAN Eukaryotic translation initiation factor 4 gamma 3 OS=Homo sapiens OX=9606 GN=EIF4G3 PE=1 SV=2	None	By matching	None	None	None	None	None	None	None	None	None	None	None	By MS/MS	None	None	None	None	267190	0	123630	0	0	0	0	0	0	0	0	0	0	0	143560	0	0	0	0
P08123	P08123	Collagen alpha-2(I) chain	COL1A2	sp|P08123|CO1A2_HUMAN Collagen alpha-2(I) chain OS=Homo sapiens OX=9606 GN=COL1A2 PE=1 SV=7	None	None	None	None	None	None	None	None	None	None	By MS/MS	None	None	By matching	None	None	None	None	136530	0	0	0	0	0	0	0	0	0	0	111970	0	0	24552	0	0	0	0
Q9HCL3	Q9HCL3	Zinc finger protein 14 homolog	ZFP14	sp|Q9HCL3|ZFP14_HUMAN Zinc finger protein 14 homolog OS=Homo sapiens OX=9606 GN=ZFP14 PE=1 SV=2	None	None	By matching	None	None	None	None	None	By MS/MS	By matching	None	None	None	None	None	None	None	None	124770	0	0	59376	0	0	0	0	0	44705	20687	0	0	0	0	0	0	0	0
Q9BY42	Q9BY42	Replication termination factor 2	RTF2	sp|Q9BY42|RTF2_HUMAN Replication termination factor 2 OS=Homo sapiens OX=9606 GN=RTF2 PE=1 SV=3	None	None	None	None	None	None	None	None	By MS/MS	None	None	None	None	None	None	None	None	None	60725	0	0	0	0	0	0	0	0	60725	0	0	0	0	0	0	0	0	0
O14841	O14841	5-oxoprolinase	OPLAH	sp|O14841|OPLA_HUMAN 5-oxoprolinase OS=Homo sapiens OX=9606 GN=OPLAH PE=1 SV=3	None	None	None	None	None	None	None	None	None	None	None	None	None	None	By MS/MS	None	None	None	0	0	0	0	0	0	0	0	0	0	0	0	0	0	0	0	0	0	0
O43390	O43390	Heterogeneous nuclear ribonucleoprotein R	HNRNPR	sp|O43390|HNRPR_HUMAN Heterogeneous nuclear ribonucleoprotein R OS=Homo sapiens OX=9606 GN=HNRNPR PE=1 SV=1	By MS/MS	None	None	None	By MS/MS	None	By MS/MS	None	None	None	None	None	None	None	None	None	None	None	0	0	0	0	0	0	0	0	0	0	0	0	0	0	0	0	0	0	0
O76064	O76064	E3 ubiquitin-protein ligase RNF8	RNF8	sp|O76064|RNF8_HUMAN E3 ubiquitin-protein ligase RNF8 OS=Homo sapiens OX=9606 GN=RNF8 PE=1 SV=1	None	None	None	None	None	None	None	None	None	None	None	By MS/MS	None	None	None	None	None	None	0	0	0	0	0	0	0	0	0	0	0	0	0	0	0	0	0	0	0
P00450	P00450	Ceruloplasmin	CP	sp|P00450|CERU_HUMAN Ceruloplasmin OS=Homo sapiens OX=9606 GN=CP PE=1 SV=2	None	None	None	None	By MS/MS	None	None	None	None	None	None	None	None	None	None	None	None	None	0	0	0	0	0	0	0	0	0	0	0	0	0	0	0	0	0	0	0
Q12888	Q12888	TP53-binding protein 1	TP53BP1	sp|Q12888|TP53B_HUMAN TP53-binding protein 1 OS=Homo sapiens OX=9606 GN=TP53BP1 PE=1 SV=2	None	None	None	None	None	None	None	None	None	None	By MS/MS	None	None	None	None	None	None	None	0	0	0	0	0	0	0	0	0	0	0	0	0	0	0	0	0	0	0
Q5VZE5	Q5VZE5	N-alpha-acetyltransferase 35, NatC auxiliary subunit	NAA35	sp|Q5VZE5|NAA35_HUMAN N-alpha-acetyltransferase 35, NatC auxiliary subunit OS=Homo sapiens OX=9606 GN=NAA35 PE=1 SV=1	None	None	None	None	None	None	None	None	By MS/MS	None	None	None	None	None	None	None	None	None	0	0	0	0	0	0	0	0	0	0	0	0	0	0	0	0	0	0	0
Q86Y13	Q86Y13	E3 ubiquitin-protein ligase DZIP3	DZIP3	sp|Q86Y13|DZIP3_HUMAN E3 ubiquitin-protein ligase DZIP3 OS=Homo sapiens OX=9606 GN=DZIP3 PE=1 SV=2	By MS/MS	None	None	None	None	None	None	None	None	None	None	None	None	None	None	None	None	None	0	0	0	0	0	0	0	0	0	0	0	0	0	0	0	0	0	0	0
Q8IUD2	Q8IUD2	ELKS/Rab6-interacting/CAST family member 1	ERC1	sp|Q8IUD2|RB6I2_HUMAN ELKS/Rab6-interacting/CAST family member 1 OS=Homo sapiens OX=9606 GN=ERC1 PE=1 SV=1	None	None	None	None	None	None	None	None	None	None	None	None	None	None	None	None	By MS/MS	None	0	0	0	0	0	0	0	0	0	0	0	0	0	0	0	0	0	0	0
Q8NA03	Q8NA03	Fibrous sheath-interacting protein 1	FSIP1	sp|Q8NA03|FSIP1_HUMAN Fibrous sheath-interacting protein 1 OS=Homo sapiens OX=9606 GN=FSIP1 PE=1 SV=1	None	None	None	By MS/MS	None	None	By MS/MS	By MS/MS	None	None	None	None	None	None	None	None	None	None	0	0	0	0	0	0	0	0	0	0	0	0	0	0	0	0	0	0	0
Q9BXX0	Q9BXX0	EMILIN-2	EMILIN2	sp|Q9BXX0|EMIL2_HUMAN EMILIN-2 OS=Homo sapiens OX=9606 GN=EMILIN2 PE=1 SV=3	None	None	None	None	By MS/MS	None	None	None	None	None	None	None	None	None	None	None	None	None	0	0	0	0	0	0	0	0	0	0	0	0	0	0	0	0	0	0	0
Q9H6N6	Q9H6N6	Putative uncharacterized protein MYH16	MYH16	sp|Q9H6N6|MYH16_HUMAN Putative uncharacterized protein MYH16 OS=Homo sapiens OX=9606 GN=MYH16 PE=1 SV=2	None	None	None	None	None	None	None	None	None	None	None	None	None	None	None	None	None	By MS/MS	0	0	0	0	0	0	0	0	0	0	0	0	0	0	0	0	0	0	0

## Sheet: protein groups analysis
Number of Proeins Identification	S1A	S1B	S1C	S2A	S2B	S2C	S3A	S3B	S3C	S4A	S4B	S4C	S5A	S5B	S5C	S6A	S6B	S6C
	462	392	481	378	421	346	401	339	440	362	378	316	283	342	362	297	355	330
Top 10 proteins quantative		S1A	S1B	S1C	S2A	S2B	S2C	S3A	S3B	S3C	S4A	S4B	S4C	S5A	S5B	S5C	S6A	S6B	S6C
	H4C1	35366000000	19599000000	16499000000	15133000000	12838000000	19156000000	24436000000	14053000000	18633000000	13545000000	21183000000	15182000000	12667000000	16777000000	28957000000	15003000000	25943000000	18256000000
	H2BC13;H2BC14;H2BC15;H2BC9;H2BC18;H2BC4;H2BC5;H2BC12L;H2BC12;H2BC1	18461000000	17265000000	8.1469e+09	13170000000	9760800000	14765000000	21417000000	12147000000	12848000000	10088000000	19285000000	13794000000	12176000000	13805000000	17095000000	12191000000	13214000000	13928000000
	H2AZ2;H2AZ1;H2AC6;H2AC25;H2AC4;H2AC1	18589000000	18631000000	4754600000	15420000000	4830200000	16961000000	23191000000	12444000000	14043000000	5585700000	22202000000	14617000000	12073000000	15868000000	8.0493e+09	14075000000	7.2528e+09	6.9758e+09
	H3C15;H3-3A;H3C1;H3-5;H3-4	15896000000	14722000000	8.0131e+09	10772000000	8.2663e+09	13231000000	16570000000	11158000000	7.7089e+09	9340200000	14557000000	11396000000	9194500000	11072000000	13440000000	9162300000	11127000000	11989000000
	H1-2;H1-3	6.5098e+09	8.1605e+09	3.2523e+09	5611500000	3.5518e+09	5711200000	9437000000	3.8999e+09	6.139e+09	3.0726e+09	9515000000	3.5193e+09	2433900000	1.8458e+09	2148100000	2382400000	1.9938e+09	3.175e+09
	RPLP2	1.5589e+09	1.4927e+09	609850000	1179000000	885590000	1.6653e+09	1375900000	1181600000	1.4912e+09	1361500000	1.9028e+09	1.9379e+09	1299800000	1.6907e+09	2626100000	1.4804e+09	1.7186e+09	2.137e+09
	H2BC21;H2BC3;H2BC17;H2BC11;H2BC26	1.8238e+09	1.8051e+09	641450000	1.4942e+09	488850000	1451200000	1.9629e+09	1319900000	1357100000	925420000	1.8991e+09	1195300000	907510000	1177400000	1.6273e+09	1220700000	1310000000	1178100000
	H1-0	1.4659e+09	1.7418e+09	490300000	1243100000	665890000	1215200000	2244200000	731810000	1.07e+09	570020000	2485800000	691270000	630630000	432900000	557070000	594630000	473030000	696970000
	RPL36	815360000	1307100000	406190000	767180000	556400000	1147800000	1361500000	675050000	851250000	505900000	1160400000	896340000	780570000	689580000	1.0068e+09	768530000	773770000	974700000
	SUB1	785980000	1.0433e+09	453270000	609920000	516570000	473820000	1.613e+09	345050000	1286900000	335520000	1.881e+09	446010000	152650000	166000000	275530000	192120000	178230000	351910000
Histones quantitative		S1A	S1B	S1C	S2A	S2B	S2C	S3A	S3B	S3C	S4A	S4B	S4C	S5A	S5B	S5C	S6A	S6B	S6C
	H4C1	35366000000	19599000000	16499000000	15133000000	12838000000	19156000000	24436000000	14053000000	18633000000	13545000000	21183000000	15182000000	12667000000	16777000000	28957000000	15003000000	25943000000	18256000000
	H2BC13;H2BC14;H2BC15;H2BC9;H2BC18;H2BC4;H2BC5;H2BC12L;H2BC12;H2BC1	18461000000	17265000000	8.1469e+09	13170000000	9760800000	14765000000	21417000000	12147000000	12848000000	10088000000	19285000000	13794000000	12176000000	13805000000	17095000000	12191000000	13214000000	13928000000
	H2AZ2;H2AZ1;H2AC6;H2AC25;H2AC4;H2AC1	18589000000	18631000000	4754600000	15420000000	4830200000	16961000000	23191000000	12444000000	14043000000	5585700000	22202000000	14617000000	12073000000	15868000000	8.0493e+09	14075000000	7.2528e+09	6.9758e+09
	H3C15;H3-3A;H3C1;H3-5;H3-4	15896000000	14722000000	8.0131e+09	10772000000	8.2663e+09	13231000000	16570000000	11158000000	7.7089e+09	9340200000	14557000000	11396000000	9194500000	11072000000	13440000000	9162300000	11127000000	11989000000
	H1-2;H1-3	6.5098e+09	8.1605e+09	3.2523e+09	5611500000	3.5518e+09	5711200000	9437000000	3.8999e+09	6.139e+09	3.0726e+09	9515000000	3.5193e+09	2433900000	1.8458e+09	2148100000	2382400000	1.9938e+09	3.175e+09
	H2BC21;H2BC3;H2BC17;H2BC11;H2BC26	1.8238e+09	1.8051e+09	641450000	1.4942e+09	488850000	1451200000	1.9629e+09	1319900000	1357100000	925420000	1.8991e+09	1195300000	907510000	1177400000	1.6273e+09	1220700000	1310000000	1178100000
	H1-0	1.4659e+09	1.7418e+09	490300000	1243100000	665890000	1215200000	2244200000	731810000	1.07e+09	570020000	2485800000	691270000	630630000	432900000	557070000	594630000	473030000	696970000
	H2AC21	578890000	781420000	273850000	431830000	265370000	498790000	792760000	371350000	89570000	249210000	881310000	374970000	317160000	397310000	561330000	357270000	378620000	337990000
	H3-7	573680000	428670000	170770000	250210000	141080000	314670000	609320000	168140000	296280000	202730000	448130000	195280000	185100000	225500000	342700000	200990000	255690000	253310000
	H1-10	168620000	203200000	74818000	150710000	69543000	149530000	296180000	96448000	217410000	77210000	367750000	100590000	55635000	37888000	50625000	43890000	39757000	70131000
	MACROH2A1	143510000	164330000	53004000	110220000	54108000	128930000	198980000	86677000	126020000	64428000	210540000	101040000	73867000	96768000	122720000	97090000	94591000	92191000
	H1-1	79066000	83772000	35253000	77814000	36644000	69843000	120980000	44444000	59144000	29392000	119660000	37390000	30682000	22321000	28601000	27774000	23888000	32124000
	H1-4	5324100	75109000	306000000	56936000	22103000	29523000	99746000	36831000	48904000	2059600	7079700	17165000	12939000	15690000	213220000	19770000	0	18279000
	MACROH2A2	8218000	7348900	1979500	4853600	4154100	5412200	9461400	2913300	3578700	2720200	8455100	4329500	3431600	4974300	10140000	4509400	5674300	4685900
	H2AC14;H2AC12;H2AJ;H2AC20;H2AC18;H2AC7;H2AC11	0	6979700	3692000	5751400	2178200	5485100	11720000	0	0	2229800	1832400	1724400	1277900	8324000	0	0	6016500	0
	H2AX	1211500	2174000	317430	1560500	249640	1727300	5726000	3623200	0	546360	5037700	4886300	4106400	1745900	2878400	3569900	3543000	1204400
	SAP18	710540	1451400	458800	824440	430530	965020	2956100	645980	0	289730	1704800	652810	680430	360680	703200	380960	576460	488930
	EHMT1	0	0	589690	0	0	0	0	0	0	0	0	0	0	0	0	0	0	0

## Sheet: Acetyl (K) sites
Proteins	Positions within proteins	Leading proteins	Protein	Protein names	Gene names	Fasta headers	Identification type 1A	Identification type 1B	Identification type 1C	Identification type 2A	Identification type 2B	Identification type 2C	Identification type 3A	Identification type 3B	Identification type 3C	Identification type 4A	Identification type 4B	Identification type 4C	Identification type 5A	Identification type 5B	Identification type 5C	Identification type 6A	Identification type 6B	Identification type 6C	Intensity 1A	Intensity 1B	Intensity 1C	Intensity 2A	Intensity 2B	Intensity 2C	Intensity 3A	Intensity 3B	Intensity 3C	Intensity 4A	Intensity 4B	Intensity 4C	Intensity 5A	Intensity 5B	Intensity 5C	Intensity 6A	Intensity 6B	Intensity 6C
A4FU69	801	A4FU69	A4FU69	EF-hand calcium-binding domain-containing protein 5	EFCAB5	sp|A4FU69|EFCB5_HUMAN EF-hand calcium-binding domain-containing protein 5 OS=Homo sapiens OX=9606 GN=EFCAB5 PE=1 SV=3	By matching	By matching	By matching	None	None	By matching	By matching	None	By matching	None	By matching	None	By matching	None	None	None	None	None	25193000	29419000	8967100	0	0	32261000	21627000	0	35303000	0	25029000	0	12434000	0	0	0	0	0
A6NKL6	194	A6NKL6	A6NKL6	Transmembrane protein 200C	TMEM200C	sp|A6NKL6|T200C_HUMAN Transmembrane protein 200C OS=Homo sapiens OX=9606 GN=TMEM200C PE=1 SV=2	By MS/MS	By MS/MS	By MS/MS	By MS/MS	By MS/MS	By MS/MS	By MS/MS	By MS/MS	By MS/MS	By MS/MS	By MS/MS	By MS/MS	By MS/MS	By MS/MS	By MS/MS	By MS/MS	By MS/MS	By MS/MS	948070000	1.591e+09	373270000	1083700000	864800000	1.6916e+09	2.1239e+09	874390000	1.826e+09	758360000	2464200000	2491400000	833530000	1345700000	1246000000	1.0631e+09	845450000	1.804e+09
A6NKL6	196	A6NKL6	A6NKL6	Transmembrane protein 200C	TMEM200C	sp|A6NKL6|T200C_HUMAN Transmembrane protein 200C OS=Homo sapiens OX=9606 GN=TMEM200C PE=1 SV=2	By MS/MS	By MS/MS	By MS/MS	By MS/MS	By MS/MS	By MS/MS	By MS/MS	By MS/MS	By MS/MS	By MS/MS	By MS/MS	By MS/MS	By MS/MS	By MS/MS	By MS/MS	By MS/MS	By MS/MS	By MS/MS	948070000	1.591e+09	373270000	1083700000	864800000	1.6916e+09	2.1239e+09	874390000	1.826e+09	758360000	2464200000	2491400000	833530000	1345700000	1246000000	1.0631e+09	845450000	1.804e+09
A8MPP1;Q92771;Q96FC9	307;324;305	A8MPP1	A8MPP1	Putative ATP-dependent RNA helicase DDX11-like protein 8;Putative ATP-dependent RNA helicase DDX12;ATP-dependent DNA helicase DDX11	DDX11L8;DDX12P;DDX11	sp|A8MPP1|D11L8_HUMAN Putative ATP-dependent DNA helicase DDX11-like protein 8 OS=Homo sapiens OX=9606 GN=DDX11L8 PE=1 SV=1;sp|Q92771|DDX12_HUMAN Putative ATP-dependent DNA helicase DDX12 OS=Homo sapiens OX=9606 GN=DDX12P PE=5 SV=3;sp|Q96FC9|DDX11_HUMAN AT	By MS/MS	By matching	By MS/MS	By matching	By MS/MS	By matching	By matching	By MS/MS	By MS/MS	By MS/MS	By matching	By MS/MS	By matching	By MS/MS	By MS/MS	By matching	By MS/MS	By MS/MS	19687000	13949000	15166000	3788100	14272000	6193900	11662000	10688000	8661900	7906800	9738000	12536000	8168600	12209000	26906000	5911100	13705000	10760000
O43432	728	O43432	O43432	Eukaryotic translation initiation factor 4 gamma 3	EIF4G3	sp|O43432|IF4G3_HUMAN Eukaryotic translation initiation factor 4 gamma 3 OS=Homo sapiens OX=9606 GN=EIF4G3 PE=1 SV=2	None	By matching	None	None	None	None	None	None	None	None	None	None	None	By matching	None	None	None	None	0	10138000	0	0	0	0	0	0	0	0	0	0	0	11772000	0	0	0	0
O60282;P33176	884;882	O60282	O60282	Kinesin heavy chain isoform 5C;Kinesin-1 heavy chain	KIF5C;KIF5B	sp|O60282|KIF5C_HUMAN Kinesin heavy chain isoform 5C OS=Homo sapiens OX=9606 GN=KIF5C PE=1 SV=1;sp|P33176|KINH_HUMAN Kinesin-1 heavy chain OS=Homo sapiens OX=9606 GN=KIF5B PE=1 SV=1	By matching	By matching	None	By matching	None	By matching	By MS/MS	None	By MS/MS	None	By MS/MS	By MS/MS	None	None	None	By matching	By matching	None	17088000	14471000	0	11179000	0	13862000	28145000	0	24335000	0	57916000	24466000	0	0	0	13851000	7324600	0
O75151;Q6ZMT4	1079;922	O75151	O75151	Lysine-specific demethylase PHF2;Lysine-specific demethylase 7A	PHF2;KDM7A	sp|O75151|PHF2_HUMAN Lysine-specific demethylase PHF2 OS=Homo sapiens OX=9606 GN=PHF2 PE=1 SV=4;sp|Q6ZMT4|KDM7A_HUMAN Lysine-specific demethylase 7A OS=Homo sapiens OX=9606 GN=KDM7A PE=1 SV=2	By MS/MS	By matching	By matching	By MS/MS	By matching	By matching	By MS/MS	By MS/MS	By matching	By matching	By matching	By MS/MS	By matching	By MS/MS	None	By MS/MS	None	By MS/MS	34075000	15857000	6532200	14640000	8124900	13964000	23510000	9514900	11799000	7140300	17813000	19702000	5807400	35669000	0	24525000	0	21533000
O76064	250	O76064	O76064	E3 ubiquitin-protein ligase RNF8	RNF8	sp|O76064|RNF8_HUMAN E3 ubiquitin-protein ligase RNF8 OS=Homo sapiens OX=9606 GN=RNF8 PE=1 SV=1	None	None	None	None	None	None	None	None	None	None	None	By MS/MS	None	None	None	None	None	None	0	0	0	0	0	0	0	0	0	0	0	0	0	0	0	0	0	0
P10828+Q:QE19A:RA:AC	289	P10828	P10828	Thyroid hormone receptor beta	THRB	sp|P10828|THB_HUMAN Thyroid hormone receptor beta OS=Homo sapiens OX=9606 GN=THRB PE=1 SV=2	By MS/MS	None	By MS/MS	By MS/MS	By MS/MS	By MS/MS	By MS/MS	By MS/MS	By MS/MS	By MS/MS	By matching	By MS/MS	By MS/MS	By MS/MS	By MS/MS	By MS/MS	By MS/MS	By MS/MS	215390000	0	160670000	211260000	60396000	184310000	89245000	318980000	224520000	150180000	62360000	156370000	201660000	139460000	210080000	242550000	171990000	234350000
P11229	339	P11229	P11229	Muscarinic acetylcholine receptor M1	CHRM1	sp|P11229|ACM1_HUMAN Muscarinic acetylcholine receptor M1 OS=Homo sapiens OX=9606 GN=CHRM1 PE=1 SV=2	By matching	None	By matching	None	By matching	None	By matching	None	None	None	By matching	None	None	None	None	None	None	By matching	6107900	0	2612300	0	1557200	0	9124000	0	0	0	8008600	0	0	0	0	0	0	945720
P11229	342	P11229	P11229	Muscarinic acetylcholine receptor M1	CHRM1	sp|P11229|ACM1_HUMAN Muscarinic acetylcholine receptor M1 OS=Homo sapiens OX=9606 GN=CHRM1 PE=1 SV=2	By matching	None	By matching	None	By matching	None	By matching	None	None	None	By matching	None	None	None	None	None	None	By matching	6107900	0	2612300	0	1557200	0	9124000	0	0	0	8008600	0	0	0	0	0	0	945720
P21580	81	P21580	P21580	Tumor necrosis factor alpha-induced protein 3;A20p50;A20p37	TNFAIP3	sp|P21580|TNAP3_HUMAN Tumor necrosis factor alpha-induced protein 3 OS=Homo sapiens OX=9606 GN=TNFAIP3 PE=1 SV=1	By MS/MS	By MS/MS	By MS/MS	By MS/MS	By MS/MS	By matching	By MS/MS	By MS/MS	By MS/MS	By MS/MS	By MS/MS	By MS/MS	None	None	By MS/MS	By MS/MS	By matching	By MS/MS	227560000	354560000	143380000	180490000	163910000	217230000	268300000	111120000	358500000	94700000	354880000	178790000	0	0	128690000	234940000	144370000	179750000
P21580	82	P21580	P21580	Tumor necrosis factor alpha-induced protein 3;A20p50;A20p37	TNFAIP3	sp|P21580|TNAP3_HUMAN Tumor necrosis factor alpha-induced protein 3 OS=Homo sapiens OX=9606 GN=TNFAIP3 PE=1 SV=1	By MS/MS	By MS/MS	By MS/MS	By MS/MS	By MS/MS	By matching	By MS/MS	By MS/MS	By MS/MS	By MS/MS	By MS/MS	By MS/MS	None	None	By MS/MS	By MS/MS	By matching	By MS/MS	227560000	354560000	143380000	180490000	163910000	217230000	268300000	111120000	358500000	94700000	354880000	178790000	0	0	128690000	234940000	144370000	179750000
P62805	9	P62805	P62805	Histone H4	H4C1	sp|P62805|H4_HUMAN Histone H4 OS=Homo sapiens OX=9606 GN=H4C1 PE=1 SV=2	By matching	By matching	By matching	By MS/MS	By matching	By MS/MS	By MS/MS	By MS/MS	By MS/MS	By matching	By MS/MS	By MS/MS	By MS/MS	By MS/MS	By matching	By MS/MS	By MS/MS	By MS/MS	4672300	5039800	858290	2605000	684870	4610000	12348000	3199300	0	1195600	14838000	5313600	3469700	6670100	6683200	4490800	4273600	2527900
P62805	13	P62805	P62805	Histone H4	H4C1	sp|P62805|H4_HUMAN Histone H4 OS=Homo sapiens OX=9606 GN=H4C1 PE=1 SV=2	By MS/MS	By MS/MS	By MS/MS	By MS/MS	By MS/MS	By MS/MS	By MS/MS	By MS/MS	By MS/MS	By MS/MS	By MS/MS	By MS/MS	By MS/MS	By MS/MS	By MS/MS	By MS/MS	By MS/MS	By MS/MS	1.0604e+09	1137400000	346460000	779070000	380620000	1.0271e+09	1.5011e+09	679170000	99493000	545450000	1.7175e+09	818660000	652500000	841080000	1158800000	746390000	886080000	792460000
P62805	17	P62805	P62805	Histone H4	H4C1	sp|P62805|H4_HUMAN Histone H4 OS=Homo sapiens OX=9606 GN=H4C1 PE=1 SV=2	By MS/MS	By MS/MS	By MS/MS	By MS/MS	By MS/MS	By MS/MS	By MS/MS	By MS/MS	By MS/MS	By MS/MS	By MS/MS	By MS/MS	By MS/MS	By MS/MS	By MS/MS	By MS/MS	By MS/MS	By MS/MS	1.0604e+09	1137400000	346460000	779070000	380620000	1.0271e+09	1.5011e+09	679170000	99493000	545450000	1.7175e+09	818660000	652500000	841080000	1158800000	746390000	886080000	792460000
P62805	6	P62805	P62805	Histone H4	H4C1	sp|P62805|H4_HUMAN Histone H4 OS=Homo sapiens OX=9606 GN=H4C1 PE=1 SV=2	None	By matching	By matching	By MS/MS	By matching	By MS/MS	None	By MS/MS	By MS/MS	None	By MS/MS	By MS/MS	By MS/MS	By MS/MS	By matching	By MS/MS	By MS/MS	By MS/MS	0	64873000	23117000	56589000	21165000	50586000	0	45604000	2430400	0	101910000	54953000	38618000	50663000	56962000	43052000	52340000	48938000
Q71DI3;P84243;P68431;Q6NXT2;Q5TEC6	19;19;19;19;19	Q71DI3;Q5TEC6	Q71DI3	Histone H3.2;Histone H3.3;Histone H3.1;Histone H3.3C;Histone H3-7	H3C15;H3-3A;H3C1;H3-5;H3-7	sp|Q71DI3|H32_HUMAN Histone H3.2 OS=Homo sapiens OX=9606 GN=H3C15 PE=1 SV=3;sp|P84243|H33_HUMAN Histone H3.3 OS=Homo sapiens OX=9606 GN=H3-3A PE=1 SV=2;sp|P68431|H31_HUMAN Histone H3.1 OS=Homo sapiens OX=9606 GN=H3C1 PE=1 SV=2;sp|Q6NXT2|H3C_HUMAN Histone H	By MS/MS	By MS/MS	By MS/MS	By MS/MS	By MS/MS	By MS/MS	By MS/MS	By MS/MS	By MS/MS	By MS/MS	By MS/MS	By MS/MS	By MS/MS	By MS/MS	By MS/MS	By MS/MS	By MS/MS	By MS/MS	1244900000	1278900000	460400000	738590000	438460000	1.0727e+09	1.5335e+09	693370000	338180000	547410000	1.4612e+09	826350000	503640000	846870000	1217000000	681860000	929390000	759980000
Q71DI3;P84243;P68431;Q6NXT2;Q5TEC6	24;24;24;24;24	Q71DI3;Q5TEC6	Q71DI3	Histone H3.2;Histone H3.3;Histone H3.1;Histone H3.3C;Histone H3-7	H3C15;H3-3A;H3C1;H3-5;H3-7	sp|Q71DI3|H32_HUMAN Histone H3.2 OS=Homo sapiens OX=9606 GN=H3C15 PE=1 SV=3;sp|P84243|H33_HUMAN Histone H3.3 OS=Homo sapiens OX=9606 GN=H3-3A PE=1 SV=2;sp|P68431|H31_HUMAN Histone H3.1 OS=Homo sapiens OX=9606 GN=H3C1 PE=1 SV=2;sp|Q6NXT2|H3C_HUMAN Histone H	By MS/MS	By MS/MS	By MS/MS	By MS/MS	By MS/MS	By MS/MS	By MS/MS	By MS/MS	By MS/MS	By MS/MS	By MS/MS	By MS/MS	By MS/MS	By MS/MS	By MS/MS	By MS/MS	By MS/MS	By MS/MS	2.9424e+09	2152700000	1356000000	2204100000	1165100000	7.9634e+09	3.9764e+09	3.1015e+09	389160000	1.8197e+09	3.0866e+09	4.2762e+09	1.7361e+09	3.6758e+09	4.0751e+09	1145600000	3.8249e+09	2774800000
Q14004	677	Q14004	Q14004	Cyclin-dependent kinase 13	CDK13	sp|Q14004|CDK13_HUMAN Cyclin-dependent kinase 13 OS=Homo sapiens OX=9606 GN=CDK13 PE=1 SV=2	By MS/MS	By MS/MS	By matching	By MS/MS	By matching	By MS/MS	By MS/MS	By matching	By matching	By MS/MS	By MS/MS	By matching	By matching	By MS/MS	By MS/MS	By MS/MS	By matching	None	32090000	29809000	5021600	18396000	5160900	33144000	36232000	4975500	1405000	10808000	46720000	14018000	6495700	22124000	23586000	13579000	7419000	0
Q2NKQ1	386	Q2NKQ1	Q2NKQ1	Small G protein signaling modulator 1	SGSM1	sp|Q2NKQ1|SGSM1_HUMAN Small G protein signaling modulator 1 OS=Homo sapiens OX=9606 GN=SGSM1 PE=1 SV=2	By matching	By matching	By matching	None	None	By matching	By matching	By matching	By matching	By matching	By matching	By MS/MS	By matching	By MS/MS	By MS/MS	By matching	By MS/MS	By matching	18854000	12372000	8499000	0	0	22410000	11322000	21461000	14583000	19329000	29311000	46225000	13670000	40284000	53624000	41635000	46657000	34028000
Q2NKQ1	388	Q2NKQ1	Q2NKQ1	Small G protein signaling modulator 1	SGSM1	sp|Q2NKQ1|SGSM1_HUMAN Small G protein signaling modulator 1 OS=Homo sapiens OX=9606 GN=SGSM1 PE=1 SV=2	By matching	By matching	By matching	None	None	By matching	By matching	By matching	By matching	By matching	By matching	By MS/MS	By matching	By MS/MS	By MS/MS	By matching	By MS/MS	By matching	18854000	12372000	8499000	0	0	22410000	11322000	21461000	14583000	19329000	29311000	46225000	13670000	40284000	53624000	41635000	46657000	34028000
Q52M93	109	Q52M93	Q52M93	Zinc finger protein 585B	ZNF585B	sp|Q52M93|Z585B_HUMAN Zinc finger protein 585B OS=Homo sapiens OX=9606 GN=ZNF585B PE=1 SV=1	By MS/MS	By MS/MS	By MS/MS	By MS/MS	By MS/MS	By MS/MS	By matching	By MS/MS	By MS/MS	By matching	By MS/MS	By matching	By matching	By MS/MS	By MS/MS	By matching	By MS/MS	By MS/MS	897660000	70821000	86485000	1.0109e+09	190140000	66002000	104990000	132570000	625800000	29331000	218600000	17489000	33013000	1.9041e+09	56354000	21516000	690560000	739510000
Q5JTW2	578	Q5JTW2	Q5JTW2	Centrosomal protein of 78 kDa	CEP78	sp|Q5JTW2|CEP78_HUMAN Centrosomal protein of 78 kDa OS=Homo sapiens OX=9606 GN=CEP78 PE=1 SV=1	By matching	None	By matching	None	By matching	None	None	By MS/MS	By matching	None	By MS/MS	By MS/MS	By matching	None	None	By MS/MS	None	By MS/MS	26196000	0	15419000	0	2967900	0	0	95445000	19595000	0	41560000	62523000	21405000	0	0	104110000	0	45020000
Q5JTW2	584	Q5JTW2	Q5JTW2	Centrosomal protein of 78 kDa	CEP78	sp|Q5JTW2|CEP78_HUMAN Centrosomal protein of 78 kDa OS=Homo sapiens OX=9606 GN=CEP78 PE=1 SV=1	By matching	None	By matching	None	By matching	None	None	By MS/MS	By matching	None	By MS/MS	By MS/MS	By matching	None	None	By MS/MS	None	By MS/MS	26196000	0	15419000	0	2967900	0	0	95445000	19595000	0	41560000	62523000	21405000	0	0	104110000	0	45020000
Q5T5P2	597	Q5T5P2	Q5T5P2	Sickle tail protein homolog	KIAA1217	sp|Q5T5P2|SKT_HUMAN Sickle tail protein homolog OS=Homo sapiens OX=9606 GN=KIAA1217 PE=1 SV=2	By matching	None	None	None	None	By MS/MS	By MS/MS	By MS/MS	By MS/MS	By MS/MS	None	None	None	By MS/MS	By MS/MS	By MS/MS	None	By MS/MS	17767000	0	0	0	0	53653000	52744000	39957000	72915000	53098000	0	0	0	34466000	64414000	43221000	0	33031000
Q5T5P2	600	Q5T5P2	Q5T5P2	Sickle tail protein homolog	KIAA1217	sp|Q5T5P2|SKT_HUMAN Sickle tail protein homolog OS=Homo sapiens OX=9606 GN=KIAA1217 PE=1 SV=2	By matching	None	None	None	None	By MS/MS	By MS/MS	By MS/MS	By MS/MS	By MS/MS	None	None	None	By MS/MS	By MS/MS	By MS/MS	None	By MS/MS	17767000	0	0	0	0	53653000	52744000	39957000	72915000	53098000	0	0	0	34466000	64414000	43221000	0	33031000
Q5VUA4	1110	Q5VUA4	Q5VUA4	Zinc finger protein 318	ZNF318	sp|Q5VUA4|ZN318_HUMAN Zinc finger protein 318 OS=Homo sapiens OX=9606 GN=ZNF318 PE=1 SV=2	By MS/MS	By MS/MS	By MS/MS	By MS/MS	By MS/MS	By matching	By MS/MS	By matching	By MS/MS	By matching	By MS/MS	By matching	By matching	By matching	By matching	By matching	By MS/MS	By matching	52973000	84184000	21077000	16897000	20844000	9216200	78088000	9888900	39002000	10978000	80203000	10912000	8329300	9613800	17416000	7830200	16261000	11470000
Q8IUD2	706	Q8IUD2	Q8IUD2	ELKS/Rab6-interacting/CAST family member 1	ERC1	sp|Q8IUD2|RB6I2_HUMAN ELKS/Rab6-interacting/CAST family member 1 OS=Homo sapiens OX=9606 GN=ERC1 PE=1 SV=1	None	None	None	None	None	None	None	None	None	None	None	None	None	None	None	None	By MS/MS	None	0	0	0	0	0	0	0	0	0	0	0	0	0	0	0	0	0	0
Q8IUD2	707	Q8IUD2	Q8IUD2	ELKS/Rab6-interacting/CAST family member 1	ERC1	sp|Q8IUD2|RB6I2_HUMAN ELKS/Rab6-interacting/CAST family member 1 OS=Homo sapiens OX=9606 GN=ERC1 PE=1 SV=1	None	None	None	None	None	None	None	None	None	None	None	None	None	None	None	None	By MS/MS	None	0	0	0	0	0	0	0	0	0	0	0	0	0	0	0	0	0	0
Q8NB90	254	Q8NB90	Q8NB90	ATPase family gene 2 protein homolog A	AFG2A	sp|Q8NB90|AFG2A_HUMAN ATPase family gene 2 protein homolog A OS=Homo sapiens OX=9606 GN=AFG2A PE=1 SV=3	By MS/MS	By MS/MS	By MS/MS	By MS/MS	By MS/MS	By MS/MS	By MS/MS	By MS/MS	By MS/MS	By MS/MS	By MS/MS	By MS/MS	By MS/MS	By MS/MS	By MS/MS	By MS/MS	By MS/MS	By MS/MS	38062000	39471000	11989000	23866000	13940000	32592000	41358000	18198000	16528000	13681000	38695000	16687000	13476000	12621000	13830000	9618900	9840000	16820000
Q8TD57	3214	Q8TD57	Q8TD57	Dynein axonemal heavy chain 3	DNAH3	sp|Q8TD57|DYH3_HUMAN Dynein axonemal heavy chain 3 OS=Homo sapiens OX=9606 GN=DNAH3 PE=1 SV=1	By MS/MS	None	By MS/MS	By MS/MS	None	None	None	By MS/MS	By matching	By MS/MS	None	By MS/MS	By MS/MS	By MS/MS	By MS/MS	By MS/MS	By matching	None	89459000	0	63350000	31969000	0	0	0	42294000	77492000	40923000	0	62525000	21235000	52033000	105410000	28117000	66549000	0
Q8TD57	3220	Q8TD57	Q8TD57	Dynein axonemal heavy chain 3	DNAH3	sp|Q8TD57|DYH3_HUMAN Dynein axonemal heavy chain 3 OS=Homo sapiens OX=9606 GN=DNAH3 PE=1 SV=1	By MS/MS	None	By MS/MS	By MS/MS	None	None	None	By MS/MS	By matching	By MS/MS	None	By MS/MS	By MS/MS	By MS/MS	By MS/MS	By MS/MS	By matching	None	89459000	0	63350000	31969000	0	0	0	42294000	77492000	40923000	0	62525000	21235000	52033000	105410000	28117000	66549000	0
Q8WZA1	5	Q8WZA1	Q8WZA1	Protein O-linked-mannose beta-1,2-N-acetylglucosaminyltransferase 1	POMGNT1	sp|Q8WZA1|PMGT1_HUMAN Protein O-linked-mannose beta-1,2-N-acetylglucosaminyltransferase 1 OS=Homo sapiens OX=9606 GN=POMGNT1 PE=1 SV=2	By MS/MS	By MS/MS	By matching	By MS/MS	By matching	By MS/MS	By MS/MS	By MS/MS	By matching	By matching	By MS/MS	By MS/MS	By MS/MS	By MS/MS	By MS/MS	By MS/MS	By MS/MS	By MS/MS	91406000	109800000	13559000	69783000	9449300	60971000	132520000	31330000	14123000	25559000	31474000	27176000	29516000	48968000	89056000	37559000	56139000	64008000
Q96CN4	53	Q96CN4	Q96CN4	EVI5-like protein	EVI5L	sp|Q96CN4|EVI5L_HUMAN EVI5-like protein OS=Homo sapiens OX=9606 GN=EVI5L PE=1 SV=1	By MS/MS	By matching	By matching	By matching	By matching	By matching	By matching	By matching	By matching	By MS/MS	By matching	By matching	None	By matching	None	By matching	By matching	By matching	23308000	7110800	4053900	8159900	3228600	7373100	12078000	3722200	4498000	7315800	13430000	9050900	0	9133000	0	5067800	12557000	8212200
Q99558	650	Q99558	Q99558	Mitogen-activated protein kinase kinase kinase 14	MAP3K14	sp|Q99558|M3K14_HUMAN Mitogen-activated protein kinase kinase kinase 14 OS=Homo sapiens OX=9606 GN=MAP3K14 PE=1 SV=2	By MS/MS	By MS/MS	By MS/MS	By MS/MS	By MS/MS	By MS/MS	By MS/MS	By MS/MS	By MS/MS	By MS/MS	By MS/MS	By MS/MS	By MS/MS	By MS/MS	By MS/MS	By MS/MS	By MS/MS	By MS/MS	124190000	101890000	61371000	53080000	48775000	76264000	96731000	41908000	71888000	44115000	115100000	57381000	41453000	49603000	86364000	65502000	84364000	67229000
Q9BY42	266	Q9BY42	Q9BY42	Replication termination factor 2	RTF2	sp|Q9BY42|RTF2_HUMAN Replication termination factor 2 OS=Homo sapiens OX=9606 GN=RTF2 PE=1 SV=3	None	None	None	None	None	None	None	None	By matching	None	None	None	None	None	None	None	None	None	0	0	0	0	0	0	0	0	971610	0	0	0	0	0	0	0	0	0
Q9GZU2	327	Q9GZU2	Q9GZU2	Paternally-expressed gene 3 protein	PEG3	sp|Q9GZU2|PEG3_HUMAN Paternally-expressed gene 3 protein OS=Homo sapiens OX=9606 GN=PEG3 PE=1 SV=1	By MS/MS	By MS/MS	By matching	By MS/MS	By MS/MS	By MS/MS	By MS/MS	By matching	By MS/MS	By MS/MS	By MS/MS	By MS/MS	By matching	By MS/MS	By MS/MS	By MS/MS	By MS/MS	By matching	39029000	78423000	6823000	38381000	34200000	64510000	71960000	19169000	54737000	20214000	86198000	33972000	18796000	33400000	46104000	41389000	30206000	46000000
Q9H6N6	143	Q9H6N6	Q9H6N6	Putative uncharacterized protein MYH16	MYH16	sp|Q9H6N6|MYH16_HUMAN Putative uncharacterized protein MYH16 OS=Homo sapiens OX=9606 GN=MYH16 PE=1 SV=2	None	None	None	None	None	None	None	None	None	None	None	None	None	None	None	None	None	By MS/MS	0	0	0	0	0	0	0	0	0	0	0	0	0	0	0	0	0	0
Q9HCL3	149	Q9HCL3	Q9HCL3	Zinc finger protein 14 homolog	ZFP14	sp|Q9HCL3|ZFP14_HUMAN Zinc finger protein 14 homolog OS=Homo sapiens OX=9606 GN=ZFP14 PE=1 SV=2	None	None	By matching	None	None	None	None	None	By matching	By matching	None	None	None	None	None	None	None	None	0	0	1721900	0	0	0	0	0	1296400	599930	0	0	0	0	0	0	0	0
Q9UBX7	261	Q9UBX7	Q9UBX7	Kallikrein-11;Kallikrein-11 inactive chain 1;Kallikrein-11 inactive chain 2	KLK11	sp|Q9UBX7|KLK11_HUMAN Kallikrein-11 OS=Homo sapiens OX=9606 GN=KLK11 PE=1 SV=2	By MS/MS	By MS/MS	By MS/MS	By MS/MS	By MS/MS	By MS/MS	By MS/MS	By MS/MS	By MS/MS	By MS/MS	By MS/MS	By MS/MS	By MS/MS	By MS/MS	By MS/MS	By MS/MS	By MS/MS	By MS/MS	156500000	204530000	35658000	137150000	37718000	200450000	261190000	113610000	6341900	81740000	62652000	96407000	107760000	152780000	161740000	134620000	153580000	125880000

## Sheet: H4-H3
Number of Proeins Identification	S1A	S1B	S1C	S2A	S2B	S2C	S3A	S3B	S3C	S4A	S4B	S4C	S5A	S5B	S5C	S6A	S6B	S6C
	462	392	481	378	421	346	401	339	440	362	378	316	283	342	362	297	355	330
Top 10 proteins quantative		S1A	S1B	S1C	S2A	S2B	S2C	S3A	S3B	S3C	S4A	S4B	S4C	S5A	S5B	S5C	S6A	S6B	S6C
	H4C1	35366000000	19599000000	16499000000	15133000000	12838000000	19156000000	24436000000	14053000000	18633000000	13545000000	21183000000	15182000000	12667000000	16777000000	28957000000	15003000000	25943000000	18256000000
	H2BC13;H2BC14;H2BC15;H2BC9;H2BC18;H2BC4;H2BC5;H2BC12L;H2BC12;H2BC1	18461000000	17265000000	8.1469e+09	13170000000	9760800000	14765000000	21417000000	12147000000	12848000000	10088000000	19285000000	13794000000	12176000000	13805000000	17095000000	12191000000	13214000000	13928000000
	H2AZ2;H2AZ1;H2AC6;H2AC25;H2AC4;H2AC1	18589000000	18631000000	4754600000	15420000000	4830200000	16961000000	23191000000	12444000000	14043000000	5585700000	22202000000	14617000000	12073000000	15868000000	8.0493e+09	14075000000	7.2528e+09	6.9758e+09
	H3C15;H3-3A;H3C1;H3-5;H3-4	15896000000	14722000000	8.0131e+09	10772000000	8.2663e+09	13231000000	16570000000	11158000000	7.7089e+09	9340200000	14557000000	11396000000	9194500000	11072000000	13440000000	9162300000	11127000000	11989000000
	H1-2;H1-3	6.5098e+09	8.1605e+09	3.2523e+09	5611500000	3.5518e+09	5711200000	9437000000	3.8999e+09	6.139e+09	3.0726e+09	9515000000	3.5193e+09	2433900000	1.8458e+09	2148100000	2382400000	1.9938e+09	3.175e+09
	RPLP2	1.5589e+09	1.4927e+09	609850000	1179000000	885590000	1.6653e+09	1375900000	1181600000	1.4912e+09	1361500000	1.9028e+09	1.9379e+09	1299800000	1.6907e+09	2626100000	1.4804e+09	1.7186e+09	2.137e+09
	H2BC21;H2BC3;H2BC17;H2BC11;H2BC26	1.8238e+09	1.8051e+09	641450000	1.4942e+09	488850000	1451200000	1.9629e+09	1319900000	1357100000	925420000	1.8991e+09	1195300000	907510000	1177400000	1.6273e+09	1220700000	1310000000	1178100000
	H1-0	1.4659e+09	1.7418e+09	490300000	1243100000	665890000	1215200000	2244200000	731810000	1.07e+09	570020000	2485800000	691270000	630630000	432900000	557070000	594630000	473030000	696970000
	RPL36	815360000	1307100000	406190000	767180000	556400000	1147800000	1361500000	675050000	851250000	505900000	1160400000	896340000	780570000	689580000	1.0068e+09	768530000	773770000	974700000
	SUB1	785980000	1.0433e+09	453270000	609920000	516570000	473820000	1.613e+09	345050000	1286900000	335520000	1.881e+09	446010000	152650000	166000000	275530000	192120000	178230000	351910000
Histones quantitative		S1A	S1B	S1C	S2A	S2B	S2C	S3A	S3B	S3C	S4A	S4B	S4C	S5A	S5B	S5C	S6A	S6B	S6C
	H1-2;H1-3	6.5098e+09	8.1605e+09	3.2523e+09	5611500000	3.5518e+09	5711200000	9437000000	3.8999e+09	6.139e+09	3.0726e+09	9515000000	3.5193e+09	2433900000	1.8458e+09	2148100000	2382400000	1.9938e+09	3.175e+09
	H1-0	1.4659e+09	1.7418e+09	490300000	1243100000	665890000	1215200000	2244200000	731810000	1.07e+09	570020000	2485800000	691270000	630630000	432900000	557070000	594630000	473030000	696970000
	H1-10	168620000	203200000	74818000	150710000	69543000	149530000	296180000	96448000	217410000	77210000	367750000	100590000	55635000	37888000	50625000	43890000	39757000	70131000
	H1-1	79066000	83772000	35253000	77814000	36644000	69843000	120980000	44444000	59144000	29392000	119660000	37390000	30682000	22321000	28601000	27774000	23888000	32124000
	H1-4	5324100	75109000	306000000	56936000	22103000	29523000	99746000	36831000	48904000	2059600	7079700	17165000	12939000	15690000	213220000	19770000	0	18279000
	H2AZ2;H2AZ1;H2AC6;H2AC25;H2AC4;H2AC1	18589000000	18631000000	4754600000	15420000000	4830200000	16961000000	23191000000	12444000000	14043000000	5585700000	22202000000	14617000000	12073000000	15868000000	8.0493e+09	14075000000	7.2528e+09	6.9758e+09
	H2AC21	578890000	781420000	273850000	431830000	265370000	498790000	792760000	371350000	89570000	249210000	881310000	374970000	317160000	397310000	561330000	357270000	378620000	337990000
	H2AC14;H2AC12;H2AJ;H2AC20;H2AC18;H2AC7;H2AC11	0	6979700	3692000	5751400	2178200	5485100	11720000	0	0	2229800	1832400	1724400	1277900	8324000	0	0	6016500	0
	H2AX	1211500	2174000	317430	1560500	249640	1727300	5726000	3623200	0	546360	5037700	4886300	4106400	1745900	2878400	3569900	3543000	1204400
	H2BC13;H2BC14;H2BC15;H2BC9;H2BC18;H2BC4;H2BC5;H2BC12L;H2BC12;H2BC1	18461000000	17265000000	8.1469e+09	13170000000	9760800000	14765000000	21417000000	12147000000	12848000000	10088000000	19285000000	13794000000	12176000000	13805000000	17095000000	12191000000	13214000000	13928000000
	H2BC21;H2BC3;H2BC17;H2BC11;H2BC26	1.8238e+09	1.8051e+09	641450000	1.4942e+09	488850000	1451200000	1.9629e+09	1319900000	1357100000	925420000	1.8991e+09	1195300000	907510000	1177400000	1.6273e+09	1220700000	1310000000	1178100000
	H3C15;H3-3A;H3C1;H3-5;H3-4	15896000000	14722000000	8.0131e+09	10772000000	8.2663e+09	13231000000	16570000000	11158000000	7.7089e+09	9340200000	14557000000	11396000000	9194500000	11072000000	13440000000	9162300000	11127000000	11989000000
	H3-7	573680000	428670000	170770000	250210000	141080000	314670000	609320000	168140000	296280000	202730000	448130000	195280000	185100000	225500000	342700000	200990000	255690000	253310000
	H4C1	35366000000	19599000000	16499000000	15133000000	12838000000	19156000000	24436000000	14053000000	18633000000	13545000000	21183000000	15182000000	12667000000	16777000000	28957000000	15003000000	25943000000	18256000000

## Sheet: H4-H3-acK
Proteins	Ac Positions within proteins	Protein names	Intensity S1A	Intensity S1B	Intensity S1C	Intensity S2A	Intensity S2B	Intensity S2C	Intensity S3A	Intensity S3B	Intensity S3C	Intensity S4A	Intensity S4B	Intensity S4C	Intensity S5A	Intensity S5B	Intensity S5C	Intensity S6A	Intensity S6B	Intensity S6C
Q71DI3;P84243;P68431;Q6NXT2;Q5TEC6	19;19;19;19;19	Histone H3.2;Histone H3.3;Histone H3.1;Histone H3.3C;Histone H3-7	1244900000	1278900000	460400000	738590000	438460000	1.0727e+09	1.5335e+09	693370000	338180000	547410000	1.4612e+09	826350000	503640000	846870000	1217000000	681860000	929390000	759980000
Q71DI3;P84243;P68431;Q6NXT2;Q5TEC6	24;24;24;24;24	Histone H3.2;Histone H3.3;Histone H3.1;Histone H3.3C;Histone H3-7	2.9424e+09	2152700000	1356000000	2204100000	1165100000	7.9634e+09	3.9764e+09	3.1015e+09	389160000	1.8197e+09	3.0866e+09	4.2762e+09	1.7361e+09	3.6758e+09	4.0751e+09	1145600000	3.8249e+09	2774800000
P62805	6	Histone H4	0	64873000	23117000	56589000	21165000	50586000	0	45604000	2430400	0	101910000	54953000	38618000	50663000	56962000	43052000	52340000	48938000
P62805	9	Histone H4	4672300	5039800	858290	2605000	684870	4610000	12348000	3199300	0	1195600	14838000	5313600	3469700	6670100	6683200	4490800	4273600	2527900
P62805	13	Histone H4	1.0604e+09	1137400000	346460000	779070000	380620000	1.0271e+09	1.5011e+09	679170000	99493000	545450000	1.7175e+09	818660000	652500000	841080000	1158800000	746390000	886080000	792460000
P62805	17	Histone H4	1.0604e+09	1137400000	346460000	779070000	380620000	1.0271e+09	1.5011e+09	679170000	99493000	545450000	1.7175e+09	818660000	652500000	841080000	1158800000	746390000	886080000	792460000
			iBAQ S1A	iBAQ S1B	iBAQ S1C	iBAQ S2A	iBAQ S2B	iBAQ S2C	iBAQ S3A	iBAQ S3B	iBAQ S3C	iBAQ S4A	iBAQ S4B	iBAQ S4C	iBAQ S5A	iBAQ S5B	iBAQ S5C	iBAQ S6A	iBAQ S6B	iBAQ S6C
		Histone H3.2;Histone H3.3;Histone H3.1;Histone H3.3C;Histone H3-7	15896000000	14722000000	8.0131e+09	10772000000	8.2663e+09	13231000000	16570000000	11158000000	7.7089e+09	9340200000	14557000000	11396000000	9194500000	11072000000	13440000000	9162300000	11127000000	11989000000
		H4C1	35366000000	19599000000	16499000000	15133000000	12838000000	19156000000	24436000000	14053000000	18633000000	13545000000	21183000000	15182000000	12667000000	16777000000	28957000000	15003000000	25943000000	18256000000
		iBAQ/intensity (x1000)	S1A	S1B	S1C	S2A	S2B	S2C	S3A	S3B	S3C	S4A	S4B	S4C	S5A	S5B	S5C	S6A	S6B	S6C
		H3K19ac	78.3153	86.87	57.4559	68.5657	53.0419	81.0747	92.5468	62.1411	43.8688	58.608	100.378	72.5123	54.7762	76.4875	90.5506	74.4202	83.5257	63.3898
		H3K24ac	185.103	146.223	169.223	204.614	140.946	601.874	239.976	277.962	50.4819	194.825	212.035	375.237	188.819	331.991	303.207	125.034	343.749	231.445
		H4K6ac	0	3.31002	1.40112	3.73944	1.64862	2.64074	0	3.24514	0.130435	0	4.81093	3.61962	3.04871	3.01979	1.96712	2.86956	2.0175	2.68065
		H4K9ac	0.132113	0.257146	0.0520207	0.17214	0.0533471	0.240656	0.50532	0.22766	0	0.0882687	0.700467	0.349993	0.273916	0.397574	0.230797	0.299327	0.16473	0.13847
		H4K13ac	29.9836	58.0336	20.9988	51.4815	29.6479	53.6177	61.4299	48.3292	5.33961	40.2695	81.0792	53.9231	51.5118	50.1329	40.018	49.7494	34.1549	43.4082
		H4K17ac	29.9836	58.0336	20.9988	51.4815	29.6479	53.6177	61.4299	48.3292	5.33961	40.2695	81.0792	53.9231	51.5118	50.1329	40.018	49.7494	34.1549	43.4082
		Average of iBAQ/intensity (x1000)	S1			S2			S3			S4			S5			S6
		H3K19ac	74.2137			67.5608			66.1855			77.166			73.9381			73.7785
		H3K24ac	166.85			315.811			189.473			260.699			274.672			233.41
		H4K6ac	1.57038			2.67627			1.12519			2.81018			2.67854			2.52257
		H4K9ac	0.147093			0.155381			0.244327			0.379577			0.300763			0.200842
		H4K13ac	36.3387			44.9157			38.3662			58.4239			47.2209			42.4375
		H4K17ac	36.3387			44.9157			38.3662			58.4239			47.2209			42.4375
		SD of iBAQ/intensity (x1000)
		H3K19ac	15.1299			14.0434			24.5897			21.2702			18.0229			10.0833
		H3K24ac	19.5482			249.775			121.859			99.5654			75.7309			109.371
		H4K6ac	1.66149			1.04586			1.83709			2.50552			0.616275			0.447486
		H4K9ac	0.10338			0.0947723			0.253072			0.30717			0.0865688			0.0862949
		H4K13ac	19.3179			13.2654			29.3424			20.7738			6.27591			7.84244
		H4K17ac	19.3179			13.2654			29.3424			20.7738			6.27591			7.84244
		iBAQ/intensity (x1000)
		H3K19ac	78.3153	86.87	57.4559	68.5657	53.0419	81.0747	92.5468	62.1411	43.8688	58.608	100.378	72.5123	54.7762	76.4875	90.5506	74.4202	83.5257	63.3898
		H3K24ac	185.103	146.223	169.223	204.614	140.946	601.874	239.976	277.962	50.4819	194.825	212.035	375.237	188.819	331.991	303.207	125.034	343.749	231.445
		H4K6ac	0	3.31002	1.40112	3.73944	1.64862	2.64074	0	3.24514	0.130435	0	4.81093	3.61962	3.04871	3.01979	1.96712	2.86956	2.0175	2.68065
		H4K9ac	0.132113	0.257146	0.0520207	0.17214	0.0533471	0.240656	0.50532	0.22766	0	0.0882687	0.700467	0.349993	0.273916	0.397574	0.230797	0.299327	0.16473	0.13847
		H4K13ac	29.9836	58.0336	20.9988	51.4815	29.6479	53.6177	61.4299	48.3292	5.33961	40.2695	81.0792	53.9231	51.5118	50.1329	40.018	49.7494	34.1549	43.4082
		H4K17ac	29.9836	58.0336	20.9988	51.4815	29.6479	53.6177	61.4299	48.3292	5.33961	40.2695	81.0792	53.9231	51.5118	50.1329	40.018	49.7494	34.1549	43.4082
		Average of iBAQ/intensity (x1000)	control	control+BHB	NAT10 siRNA	NAT10 siRNA+BHB	CBP+p300+HAT1 siRNA	CBP+p300+HAT1 siRNA+BHB
		H3K19ac	74.2137	67.5608	66.1855	77.166	73.9381	73.7785
		H3K24ac	166.85	315.811	189.473	260.699	274.672	233.41
		H4K6ac	1.57038	2.67627	1.12519	2.81018	2.67854	2.52257
		H4K9ac	0.147093	0.155381	0.244327	0.379577	0.300763	0.200842
		H4K13ac	36.3387	44.9157	38.3662	58.4239	47.2209	42.4375
		H4K17ac	36.3387	44.9157	38.3662	58.4239	47.2209	42.4375
		SD of iBAQ/intensity (x1000)	control	control+BHB	NAT10 siRNA	NAT10 siRNA+BHB	CBP+p300+HAT1 siRNA	CBP+p300+HAT1 siRNA+BHB
		H3K19ac	15.1299	14.0434	24.5897	21.2702	18.0229	10.0833
		H3K24ac	19.5482	249.775	121.859	99.5654	75.7309	109.371
		H4K6ac	1.66149	1.04586	1.83709	2.50552	0.616275	0.447486
		H4K9ac	0.10338	0.0947723	0.253072	0.30717	0.0865688	0.0862949
		H4K13ac	19.3179	13.2654	29.3424	20.7738	6.27591	7.84244
		H4K17ac	19.3179	13.2654	29.3424	20.7738	6.27591	7.84244
