# Supplementary material for: NAT10-mediated β-hydroxybutyrylation Affects DNA Replication
Source: Research Square preprint supplement (doi:10.21203/rs.3.rs-7110451/v1), 2025-07-24
Supplement: Supplementary file 3 [file c2e18b55ab5cf4eddb884469.xlsx]

## Sheet: iBAQ-adjust_OriginFiring
No change
Protein IDs	Majority protein IDs	Protein names	Gene names	iBAQ C1	iBAQ C2	iBAQ C3	Average-C	iBAQ S2	iBAQ S3	iBAQ S4	Average-S	p-Value	FC
O43913	O43913	Origin recognition complex subunit 5	ORC5	21.0043	22.3257	22.5057	21.9452	22.457	18.7165	20.1321	20.4352	0.301492	-1.51003
O60216;Q9H4I0	O60216	Double-strand-break repair protein rad21 homolog;64-kDa C-terminal product	RAD21	21.2909	20.8585	21.4237	21.191	21.0788	21.2137	21.6159	21.3028	0.658997	0.111767
O75122	O75122	CLIP-associating protein 2	CLASP2	17.817	16.0505	17.8497	17.2391	17.5733	17.2436	16.859	17.2253	0.984183	-0.0137667
O75717	O75717	WD repeat and HMG-box DNA-binding protein 1	WDHD1	17.6427	17.5737	17.8499	17.6888	18.5167	17.2661	17.6745	17.8191	0.760076	0.130333
O95347	O95347	Structural maintenance of chromosomes protein 2	SMC2	22.5386	22.3508	23.0021	22.6305	22.4831	22.2919	22.6271	22.4674	0.506856	-0.163133
P09884	P09884	DNA polymerase alpha catalytic subunit	POLA1	17.6463	15.9512	17.6698	17.0891	18.4834	16.5198	16.3807	17.128	0.967167	0.0388667
P11387;Q969P6	P11387	DNA topoisomerase 1	TOP1	22.2617	19.3429	19.9965	20.5337	21.9872	21.9225	23.0658	22.3252	0.169347	1.79147
P11388	P11388	DNA topoisomerase 2-alpha	TOP2A	22.8914	20.2298	20.9386	21.3533	22.2832	21.1408	23.4554	22.2931	0.418322	0.939867
P12004	P12004	Proliferating cell nuclear antigen	PCNA	28.2389	28.9191	28.7123	28.6234	28.6737	27.9377	28.0154	28.2089	0.251376	-0.4145
P15927	P15927	Replication protein A 32 kDa subunit	RPA2	22.3482	22.7071	23.0228	22.6927	22.5957	22.7729	22.8001	22.7229	0.894306	0.0302
P18858	P18858	DNA ligase 1	LIG1	19.8696	19.8503	19.5133	19.7444	18.9071	18.8077	18.9482	18.8877	0.0105518	-0.856733
P24941;Q00526	P24941;Q00526	Cyclin-dependent kinase 2;Cyclin-dependent kinase 3	CDK2;CDK3	20.2077	19.7675	19.6141	19.8631	20.0217	20.3773	19.9773	20.1254	0.30237	0.262333
P25205	P25205	DNA replication licensing factor MCM3	MCM3	25.5391	25.8431	25.638	25.6734	25.6167	25.3797	25.5663	25.5209	0.25822	-0.1525
P27694	P27694	Replication protein A 70 kDa DNA-binding subunit;Replication protein A 70 kDa DNA-binding subunit, N-terminally processed	RPA1	22.1928	22.7571	24.4453	23.1317	24.6173	22.5842	22.7922	23.3312	0.841563	0.1995
P28340	P28340	DNA polymerase delta catalytic subunit	POLD1	18.1094	17.9103	17.2256	17.7484	15.845	18.1885	16.8938	16.9758	0.377152	-0.772667
P33991;Q9UJA3	P33991	DNA replication licensing factor MCM4	MCM4	23.7749	24.3317	23.9167	24.0078	24.2383	24.1299	23.8864	24.0849	0.718867	0.0771
P33992	P33992	DNA replication licensing factor MCM5	MCM5	24.3226	24.2611	24.605	24.3962	24.0171	23.7131	24.2497	23.9933	0.107907	-0.402933
P33993	P33993	DNA replication licensing factor MCM7	MCM7	24.8227	25.2041	25.0026	25.0098	25.4746	25.2163	25.3064	25.3324	0.081493	0.322633
P35244	P35244	Replication protein A 14 kDa subunit	RPA3	21.724	22.1891	22.4562	22.1231	21.2125	22.8173	20.8158	21.6152	0.501151	-0.5079
P35249	P35249	Replication factor C subunit 4	RFC4	22.6371	23.5588	23.2021	23.1327	23.6538	23.6296	23.0523	23.4452	0.405066	0.312567
P35250	P35250	Replication factor C subunit 2	RFC2	22.8277	23.0519	22.7872	22.8889	22.9821	23.2295	22.8572	23.0229	0.387048	0.134
P35251	P35251	Replication factor C subunit 1	RFC1	20.1766	18.9892	15.6035	18.2564	18.6298	17.638	20.4753	18.9144	0.706639	0.657933
P40937	P40937	Replication factor C subunit 5	RFC5	22.2317	22.4656	22.1018	22.2664	22.1972	22.373	21.924	22.1647	0.580185	-0.101633
P40938	P40938	Replication factor C subunit 3	RFC3	21.3511	21.7212	21.8588	21.6437	21.8634	22.4824	21.1555	21.8338	0.680389	0.190067
P46063	P46063	ATP-dependent DNA helicase Q1	RECQL	24.8033	25.1462	24.7369	24.8955	24.9016	24.5075	24.5586	24.6559	0.247781	-0.239567
P49005	P49005	DNA polymerase delta subunit 2	POLD2	18.8092	19.4147	19.6261	19.2833	19.4077	19.3836	18.91	19.2338	0.875292	-0.0495667
P49642	P49642	DNA primase small subunit	PRIM1	19.7007	19.986	20.3232	20.0033	20.2343	19.9081	19.5409	19.8944	0.70685	-0.108867
P49643	P49643	DNA primase large subunit	PRIM2	21.2969	20.9593	21.365	21.2071	20.7092	21.1559	21.274	21.0464	0.495979	-0.1607
P49736	P49736	DNA replication licensing factor MCM2	MCM2	24.7812	25.2139	25.3041	25.0997	24.8572	25.1747	25.1561	25.0627	0.857447	-0.0370667
P49916	P49916	DNA ligase 3	LIG3	20.1115	19.6511	19.0138	19.5921	19.9145	19.9577	19.7706	19.8809	0.46103	0.2888
P57678	P57678	Gem-associated protein 4	GEMIN4	18.2984	18.0044	17.8354	18.0461	17.8899	17.2998	18.1509	17.7802	0.419487	-0.265867
Q02880	Q02880	DNA topoisomerase 2-beta	TOP2B	18.8412	17.3999	16.3475	17.5295	17.1164	15.9047	19.7546	17.5919	0.965663	0.0623667
Q13416	Q13416	Origin recognition complex subunit 2	ORC2	18.3882	19.4781	19.1281	18.9981	19.2048	19.291	19.3403	19.2787	0.475118	0.280567
Q14566	Q14566	DNA replication licensing factor MCM6	MCM6	25.3186	25.8635	25.6481	25.6101	25.4422	25.5575	25.3572	25.4523	0.43026	-0.157767
Q14683	Q14683	Structural maintenance of chromosomes protein 1A	SMC1A	21.8338	20.7047	21.1708	21.2364	21.8213	21.5764	22.092	21.8299	0.204353	0.593467
Q7Z460	Q7Z460	CLIP-associating protein 1	CLASP1	16.8696	16.2055	16.9895	16.6882	16.5355	16.4657	18.2079	17.0697	0.585822	0.3815
Q8IY18	Q8IY18	Structural maintenance of chromosomes protein 5	SMC5	15.1322	16.1645	18.237	16.5112	16.5649	16.8622	16.9327	16.7866	0.792161	0.275367
Q8N3U4	Q8N3U4	Cohesin subunit SA-2	STAG2	17.7761	17.6631	17.8901	17.7764	16.9594	18.5601	17.9405	17.82	0.934389	0.0435667
Q8TEQ6	Q8TEQ6	Gem-associated protein 5	GEMIN5	20.2163	19.7853	19.5878	19.8631	17.5608	19.9203	19.9729	19.1513	0.467517	-0.7118
Q8WVM7	Q8WVM7	Cohesin subunit SA-1	STAG1	18.387	19.1553	18.5426	18.695	17.1732	18.0389	18.6266	17.9462	0.215151	-0.748733
Q96SB8	Q96SB8	Structural maintenance of chromosomes protein 6	SMC6	17.6985	17.6777	16.8841	17.4201	17.6694	18.4453	16.4755	17.5301	0.873639	0.109967
Q9BQ67	Q9BQ67	Glutamate-rich WD repeat-containing protein 1	GRWD1	25.0175	25.6042	25.4721	25.3646	25.2336	25.2079	24.7944	25.0786	0.280435	-0.285967
Q9BRX5	Q9BRX5	DNA replication complex GINS protein PSF3	GINS3	20.096	20.2287	19.0999	19.8082	19.1805	19.682	18.1823	19.0149	0.237126	-0.793267
Q9BV38	Q9BV38	WD repeat-containing protein 18	WDR18	24.0772	25.0147	24.9113	24.6677	24.952	24.8393	24.4693	24.7535	0.812515	0.0858
Q9NRF9	Q9NRF9	DNA polymerase epsilon subunit 3	POLE3	21.3022	21.9726	17.8898	20.3882	21.9655	18.05	21.6312	20.5489	0.932404	0.1607
Q9NTI5	Q9NTI5	Sister chromatid cohesion protein PDS5 homolog B	PDS5B	18.2939	17.0237	17.5518	17.6231	15.9664	17.7989	17.9599	17.2417	0.6389	-0.3814
Q9NTJ3	Q9NTJ3	Structural maintenance of chromosomes protein 4	SMC4	22.0035	22.4403	22.38	22.2746	22.2747	22.3936	22.621	22.4298	0.417699	0.155167
Q9UBD5;O75330	Q9UBD5	Origin recognition complex subunit 3	ORC3	18.3753	19.4738	17.7225	18.5239	18.913	18.1214	17.5089	18.1811	0.628671	-0.342767
Q9UQE7	Q9UQE7	Structural maintenance of chromosomes protein 3	SMC3	21.5269	20.8553	21.1315	21.1712	21.565	21.3709	22.3037	21.7465	0.179502	0.5753

## Sheet: iBAQ-adjust
上调
T: Protein IDs	T: Majority protein IDs	T: Protein names	T: Gene names	iBAQ C1	iBAQ C2	iBAQ C3	Average-C	iBAQ S2	iBAQ S3	iBAQ S4	Average-S	p-Value	FC
O43395	O43395	U4/U6 small nuclear ribonucleoprotein Prp3	PRPF3	18.7972	19.5744	18.721	19.0309	19.9717	19.9101	20.7727	20.2182	0.0380444	1.1873
O75439	O75439	Mitochondrial-processing peptidase subunit beta	PMPCB	20.7157	20.6615	20.1058	20.4943	21.6421	21.5011	21.5647	21.5693	0.0271157	1.07497
O75954	O75954	Tetraspanin-9	TSPAN9	16.0636	16.0158	15.1939	15.7578	18.1006	17.444	16.6594	17.4013	0.0372889	1.64357
O94905	O94905	Erlin-2	ERLIN2	20.8776	20.8176	20.2966	20.6639	21.8911	21.6457	21.7147	21.7505	0.0170258	1.08657
P14314	P14314	Glucosidase 2 subunit beta	PRKCSH	20.1083	20.1398	20.7251	20.3244	21.4978	21.8496	20.9668	21.4381	0.0292789	1.11367
P17096	P17096	High mobility group protein HMG-I/HMG-Y	HMGA1	21.5545	21.1081	20.868	21.1769	21.898	22.1369	22.7111	22.2487	0.028356	1.0718
P18084	P18084	Integrin beta-5	ITGB5	16.9575	17.3805	17.5	17.2793	19.4167	19.1139	20.1269	19.5525	0.00626279	2.27317
Q00765	Q00765	Receptor expression-enhancing protein 5	REEP5	20.7645	20.8859	21.8694	21.1733	22.6915	22.6724	22.7273	22.6971	0.0485992	1.5238
Q15437	Q15437	Protein transport protein Sec23B	SEC23B	20.7769	20.8451	20.2839	20.6353	21.7346	21.823	21.4439	21.6672	0.0118475	1.03187
Q6P161	Q6P161	Large ribosomal subunit protein mL54	MRPL54	17.5369	17.7531	16.9402	17.4101	21.6637	21.1009	20.9	21.2215	0.000342117	3.81147
Q7Z417	Q7Z417	FMR1-interacting protein NUFIP2	NUFIP2	16.7675	17.4393	15.4913	16.566	19.27	19.2698	19.0669	19.2022	0.0421999	2.6362
Q8IYM9	Q8IYM9	E3 ubiquitin-protein ligase TRIM22	TRIM22	15.6613	15.3958	16.3091	15.7887	17.4577	18.339	18.1796	17.9921	0.00454919	2.20337
Q8NEJ9	Q8NEJ9	Neuroguidin	NGDN	21.4355	22.1746	21.3995	21.6699	23.0741	22.77	22.6383	22.8275	0.026952	1.1576
Q8WXI9	Q8WXI9	Transcriptional repressor p66-beta	GATAD2B	19.8347	19.0886	19.9887	19.6373	20.4727	21.6104	21.3185	21.1339	0.0290067	1.49653
Q99961	Q99961	Endophilin-A2	SH3GL1	17.9804	16.5018	17.3082	17.2635	20.0812	19.6804	18.937	19.5662	0.0149186	2.30273
Q9H2J4	Q9H2J4	Phosducin-like protein 3	PDCL3	18.0193	16.8553	16.7305	17.2017	18.9422	19.7069	18.4277	19.0256	0.030529	1.8239
Q9NRL2	Q9NRL2	Bromodomain adjacent to zinc finger domain protein 1A	BAZ1A	16.5275	15.0654	16.9068	16.1666	18.6757	17.7382	18.1806	18.1982	0.0498983	2.0316
Q9NTZ6	Q9NTZ6	RNA-binding protein 12	RBM12	21.2555	20.1922	20.9642	20.804	21.6492	22.4441	21.853	21.9821	0.0452299	1.17813
Q9NUQ6	Q9NUQ6	SPATS2-like protein	SPATS2L	20.4593	20.7019	19.8706	20.3439	20.873	21.784	21.7887	21.4819	0.0462501	1.13797
Q9NW82	Q9NW82	WD repeat-containing protein 70	WDR70	18.429	17.7669	17.9941	18.0633	19.5959	19.5028	19.4256	19.5081	0.0133546	1.44477
Q9UQ35	Q9UQ35	Serine/arginine repetitive matrix protein 2	SRRM2	18.0082	16.8527	17.9728	17.6112	18.9819	20.0264	19.3656	19.458	0.0208587	1.84673
下调
T: Protein IDs	T: Majority protein IDs	T: Protein names	T: Gene names	iBAQ C1	iBAQ C2	iBAQ C3	Average-C	iBAQ S2	iBAQ S3	iBAQ S4	Average-S	p-Value	FC
O00255	O00255	Menin	MEN1	17.3219	17.0332	17.7072	17.3541	16.0963	15.8427	16.7594	16.2328	0.0335772	-1.1213
O14495	O14495	Phospholipid phosphatase 3	PLPP3	18.747	19.6343	20.2895	19.5569	16.9634	17.0079	18.3607	17.444	0.0299692	-2.11293
O43920	O43920	NADH dehydrogenase [ubiquinone] iron-sulfur protein 5	NDUFS5	18.0371	17.4629	17.3198	17.6066	16.2622	16.6462	16.2026	16.3703	0.0132924	-1.23627
P11279	P11279	Lysosome-associated membrane glycoprotein 1	LAMP1	23.7213	23.305	23.6735	23.5666	21.8425	21.6603	22.0894	21.8641	0.000722668	-1.70253
P22102	P22102	Trifunctional purine biosynthetic protein adenosine-3;Phosphoribosylamine--glycine ligase;Phosphoribosylformylglycinamidine cyclo-ligase;Phosphoribosylglycinamide formyltransferase	GART	18.6448	18.2047	19.0133	18.6209	17.7328	17.1743	17.3888	17.432	0.0176754	-1.18897
Q01469	Q01469	Fatty acid-binding protein 5	FABP5	21.939	23.1345	21.7898	22.2878	15.5914	17.539	17.3895	16.84	0.00315952	-5.4478
Q02790	Q02790	Peptidyl-prolyl cis-trans isomerase FKBP4;Peptidyl-prolyl cis-trans isomerase FKBP4, N-terminally processed	FKBP4	21.3955	21.8943	21.9068	21.7322	20.9555	20.5308	20.0591	20.5151	0.0226498	-1.21707
Q03188	Q03188	Centromere protein C	CENPC	17.0537	18.1777	18.6716	17.9677	16.084	16.0717	15.0755	15.7437	0.023263	-2.22393
Q6PGP7	Q6PGP7	Superkiller complex protein 3	SKIC3	17.709	18.7427	18.271	18.2409	17.3005	16.5905	17.0999	16.997	0.0321406	-1.24393
Q96A65	Q96A65	Exocyst complex component 4	EXOC4	19.3063	19.1765	19.4472	19.31	17.9447	17.7486	18.6851	18.1261	0.045095	-1.18387
Q99784	Q99784	Noelin	OLFM1	21.4007	22.9311	22.8282	22.3867	17.7403	16.0024	15.4963	16.413	0.00289498	-5.97367
Q9NS86	Q9NS86	LanC-like protein 2	LANCL2	20.5937	21.235	21.0973	20.9753	19.4545	20.0281	19.4493	19.644	0.00825237	-1.33137
Q9NUP9	Q9NUP9	Protein lin-7 homolog C	LIN7C	22.3572	23.9148	24.0538	23.4419	21.2122	20.9701	22.1222	21.4348	0.0446948	-2.0071
Q9P2W9	Q9P2W9	Syntaxin-18	STX18	17.418	18.0295	17.5593	17.6689	16.5896	16.2556	16.4295	16.4249	0.00929575	-1.24403
no change
T: Protein IDs	T: Majority protein IDs	T: Protein names	T: Gene names	iBAQ C1	iBAQ C2	iBAQ C3	Average-C	iBAQ S2	iBAQ S3	iBAQ S4	Average-S	p-Value	FC
P0DPI3;A0A0U1RRI6;A0A0U1RR11	P0DPI3;A0A0U1RRI6;A0A0U1RR11	Centromere protein V-like protein 2;Centromere protein V-like protein 3;Centromere protein V-like protein 1	CENPVL2;CENPVL3;CENPVL1	17.5045	15.948	17.2549	16.9025	16.9227	19.3972	17.3588	17.8929	0.344406	0.990433
A0A1B0GVH6	A0A1B0GVH6	Uncharacterized protein C13orf42	C13orf42	16.4417	16.6397	17.8566	16.9793	19.2012	15.4448	18.1681	17.6047	0.644416	0.625367
A0A1B0GVZ6;Q8NHZ7;A6NJ08;A6NE82;A6NDZ8	A0A1B0GVZ6;Q8NHZ7;A6NJ08;A6NE82;A6NDZ8	Methyl-CpG-binding domain protein 3-like 2B;Methyl-CpG-binding domain protein 3-like 2;Putative methyl-CpG-binding domain protein 3-like 5;Putative methyl-CpG-binding domain protein 3-like 3;Putative methyl-CpG-binding domain protein 3-like 4	MBD3L2B;MBD3L2;MBD3L5;MBD3L3;MBD3L4	22.6781	24.2663	24.0418	23.6621	23.8559	22.6788	17.6456	21.3934	0.355899	-2.26863
A0A494C071	A0A494C071	PWWP domain-containing DNA repair factor 4	PWWP4	20.0661	21.6669	21.3537	21.0289	21.0633	18.2577	17.6644	18.9951	0.182375	-2.03377
A0FGR8	A0FGR8	Extended synaptotagmin-2	ESYT2	19.8539	18.1162	16.8819	18.284	17.9815	16.2557	19.4225	17.8866	0.767807	-0.397433
A0JLT2	A0JLT2	Mediator of RNA polymerase II transcription subunit 19	MED19	16.341	16.7185	16.8759	16.6451	17.0994	15.4695	20.2894	17.6194	0.563059	0.9743
A1L0T0	A1L0T0	2-hydroxyacyl-CoA lyase 2	ILVBL	17.9247	17.3784	18.9039	18.069	18.7808	20.7876	18.6592	19.4092	0.190098	1.3402
A2A3N6;O60331	A2A3N6	Putative PIP5K1A and PSMD4-like protein	PIPSL	19.5622	18.4389	19.4348	19.1453	19.7286	18.0466	18.5475	18.7742	0.580391	-0.371067
A2RRP1	A2RRP1	NBAS subunit of NRZ tethering complex	NBAS	15.9132	15.8639	15.7955	15.8575	16.506	15.6873	15.8014	15.9982	0.638885	0.1407
A3KN83;Q9Y2G9	A3KN83;Q9Y2G9	Protein strawberry notch homolog 1;Protein strawberry notch homolog 2	SBNO1;SBNO2	20.5776	22.1364	21.9258	21.5466	21.4489	19.3994	18.7142	19.8542	0.167436	-1.69243
A4D1E9	A4D1E9	GTP-binding protein 10	GTPBP10	17.8097	17.7581	17.635	17.7343	16.7855	16.193	19.223	17.4005	0.753489	-0.333767
A4UGR9	A4UGR9	Xin actin-binding repeat-containing protein 2	XIRP2	16.8236	16.6008	16.1538	16.5261	19.1891	16.7361	16.115	17.3467	0.475902	0.820667
A5YKK6	A5YKK6	CCR4-NOT transcription complex subunit 1	CNOT1	20.1822	19.899	19.972	20.0177	19.5793	19.8959	19.9234	19.7995	0.196856	-0.2182
A6NCE7;Q9GZQ8;Q9H492	A6NCE7;Q9GZQ8;Q9H492	Microtubule-associated proteins 1A/1B light chain 3 beta 2;Microtubule-associated proteins 1A/1B light chain 3B;Microtubule-associated proteins 1A/1B light chain 3A	MAP1LC3B2;MAP1LC3B;MAP1LC3A	23.6936	23.7035	23.1484	23.5152	23.6045	23.3573	23.5857	23.5158	0.997568	0.000666667
A6NHQ2	A6NHQ2	rRNA/tRNA 2-O-methyltransferase fibrillarin-like protein 1	FBLL1	17.9149	18.1296	16.4106	17.485	16.6892	17.2822	16.3604	16.7773	0.327708	-0.707767
A6NHR9	A6NHR9	Structural maintenance of chromosomes flexible hinge domain-containing protein 1	SMCHD1	20.7106	20.1123	19.7415	20.1881	20.539	20.5671	20.8101	20.6387	0.247264	0.4506
A6NK44	A6NK44	Glyoxalase domain-containing protein 5	GLOD5	15.7719	18.4528	25.3559	19.8602	17.0066	17.2975	16.7467	17.0169	0.424245	-2.84327
A6NKT7;Q7Z3J3;Q99666;O14715;P0DJD0;P0DJD1	A6NKT7;Q7Z3J3;Q99666;O14715;P0DJD0;P0DJD1	RanBP2-like and GRIP domain-containing protein 3;RanBP2-like and GRIP domain-containing protein 4;RANBP2-like and GRIP domain-containing protein 5/6;RANBP2-like and GRIP domain-containing protein 8;RANBP2-like and GRIP domain-containing protein 1;RANBP2-like and GRIP domain-containing protein 2	RGPD3;RGPD4;RGPD5;RGPD8;RGPD1;RGPD2	18.1324	17.0515	18.4612	17.8817	18.979	18.7637	15.5211	17.7546	0.923161	-0.1271
A6NMZ7	A6NMZ7	Collagen alpha-6(VI) chain	COL6A6	16.8297	19.313	17.5887	17.9105	16.378	18.161	17.7858	17.4416	0.636984	-0.468867
P62308;A8MWD9	P62308;A8MWD9	Small nuclear ribonucleoprotein G;Putative small nuclear ribonucleoprotein G-like protein 15	SNRPG;SNRPGP15	25.9516	26.0534	25.5849	25.8633	25.8979	26.3254	25.7609	25.9947	0.58607	0.131433
E9PAV3;Q13765;Q9BZK3	E9PAV3;Q13765	Nascent polypeptide-associated complex subunit alpha, muscle-specific form;Nascent polypeptide-associated complex subunit alpha	NACA	22.8522	23.4405	23.1027	23.1318	23.4397	23.2205	22.4578	23.0393	0.803976	-0.0924667
E9PRG8	E9PRG8	Uncharacterized protein C11orf98	C11orf98	24.126	23.4328	22.6921	23.417	23.2133	24.4699	24.0935	23.9256	0.413238	0.5086
O00116	O00116	Alkyldihydroxyacetonephosphate synthase, peroxisomal	AGPS	23.1585	22.9771	23.6327	23.2561	23.3184	23.3882	23.3939	23.3668	0.629065	0.110733
O00139	O00139	Kinesin-like protein KIF2A	KIF2A	17.6803	16.6839	15.7801	16.7148	16.8795	16.7761	17.0705	16.9087	0.758935	0.193933
O00148	O00148	ATP-dependent RNA helicase DDX39A	DDX39A	21.6823	22.1854	22.2171	22.0283	22.6439	22.4105	21.9248	22.3264	0.339366	0.298133
O00159	O00159	Unconventional myosin-Ic	MYO1C	25.0705	25.4958	25.3208	25.2957	25.249	24.9015	24.8323	24.9943	0.16663	-0.301433
O00161	O00161	Synaptosomal-associated protein 23	SNAP23	21.8516	21.1581	21.6116	21.5404	20.9142	20.4773	22.1637	21.1851	0.566582	-0.355367
O00165	O00165	HCLS1-associated protein X-1	HAX1	20.6507	20.7289	21.4349	20.9382	21.6407	21.3684	20.4397	21.1496	0.659617	0.211433
O00178	O00178	GTP-binding protein 1	GTPBP1	16.8254	17.2988	16.9584	17.0275	18.5183	17.6838	17.2132	17.8051	0.168515	0.777567
O00186	O00186	Syntaxin-binding protein 3	STXBP3	21.7134	22.144	21.7139	21.8571	21.5284	21.0966	20.9722	21.1991	0.0423353	-0.658033
O00192	O00192	Splicing regulator ARVCF	ARVCF	19.5648	18.2291	19.0196	18.9378	18.5627	19.1385	17.5225	18.4079	0.436808	-0.529933
O00193	O00193	Small acidic protein	SMAP	21.1708	21.9931	20.734	21.2993	21.3545	22.2266	22.0406	21.8739	0.281211	0.5746
O00203	O00203	AP-3 complex subunit beta-1	AP3B1	22.1138	22.122	21.5831	21.9396	20.9075	21.1641	21.6168	21.2295	0.0615888	-0.710167
O00214	O00214	Galectin-8	LGALS8	27.6148	28.7971	28.7326	28.3815	28.6421	27.1613	26.4269	27.4101	0.283056	-0.9714
O00217	O00217	NADH dehydrogenase [ubiquinone] iron-sulfur protein 8, mitochondrial	NDUFS8	22.5574	22.7715	22.3487	22.5592	22.6285	22.6706	22.7015	22.6669	0.471889	0.107667
O00231	O00231	26S proteasome non-ATPase regulatory subunit 11	PSMD11	22.8486	23.5066	23.5721	23.3091	23.7856	23.8198	23.324	23.6431	0.307706	0.334033
O00232	O00232	26S proteasome non-ATPase regulatory subunit 12	PSMD12	21.9518	22.373	21.5202	21.9483	22.4758	22.164	22.2357	22.2918	0.296883	0.3435
O00264	O00264	Membrane-associated progesterone receptor component 1	PGRMC1	24.6426	21.7154	22.0077	22.7886	24.3508	23.1338	24.6406	24.0417	0.31614	1.25317
O00267	O00267	Transcription elongation factor SPT5	SUPT5H	23.0458	23.6542	23.5142	23.4047	23.9648	23.9652	23.3815	23.7705	0.243835	0.365767
O00268	O00268	Transcription initiation factor TFIID subunit 4	TAF4	16.6222	17.5652	17.4407	17.2094	18.1224	18.4594	16.8393	17.807	0.369508	0.597667
O00299	O00299	Chloride intracellular channel protein 1	CLIC1	22.2327	22.4252	22.7948	22.4842	22.5827	22.3409	21.876	22.2665	0.459612	-0.2177
O00303	O00303	Eukaryotic translation initiation factor 3 subunit F	EIF3F	26.1673	26.8383	26.6846	26.5634	26.6453	26.1087	25.8364	26.1968	0.307316	-0.3666
O00330	O00330	Pyruvate dehydrogenase protein X component, mitochondrial	PDHX	20.6391	20.6902	20.6689	20.6661	21.1471	20.6351	20.6382	20.8068	0.495453	0.140733
O00410	O00410	Importin-5	IPO5	20.3151	19.9439	20.0076	20.0889	19.4649	19.562	20.7349	19.9206	0.725085	-0.168267
O00411	O00411	DNA-directed RNA polymerase, mitochondrial	POLRMT	15.8717	17.7611	17.5494	17.0607	15.5334	14.9324	16.2783	15.5814	0.118065	-1.47937
O00422	O00422	Histone deacetylase complex subunit SAP18	SAP18	23.589	23.621	23.3419	23.5173	23.231	24.1549	23.904	23.7633	0.471755	0.246
O00425	O00425	Insulin-like growth factor 2 mRNA-binding protein 3	IGF2BP3	22.1801	22.3079	22.6358	22.3746	22.379	22.6054	22.0596	22.348	0.904787	-0.0266
O00429	O00429	Dynamin-1-like protein	DNM1L	18.2361	18.3712	18.5864	18.3979	18.5564	19.1125	17.8174	18.4954	0.822607	0.0975333
O00443	O00443	Phosphatidylinositol 4-phosphate 3-kinase C2 domain-containing subunit alpha	PIK3C2A	17.3867	17.6944	19.6096	18.2302	17.0031	15.7625	15.9669	16.2442	0.0845534	-1.98607
O00469	O00469	Procollagen-lysine,2-oxoglutarate 5-dioxygenase 2	PLOD2	20.7546	21.2974	19.9418	20.6646	20.4911	20.1786	20.2474	20.3057	0.460705	-0.3589
O00471	O00471	Exocyst complex component 5	EXOC5	19.2685	20.4727	20.1385	19.9599	20.388	19.5059	19.5203	19.8047	0.754765	-0.155167
O00487	O00487	26S proteasome non-ATPase regulatory subunit 14	PSMD14	22.7996	23.0486	22.9755	22.9412	23.8532	23.0219	22.7156	23.1969	0.532984	0.255667
O00505	O00505	Importin subunit alpha-4	KPNA3	22.6947	23.1444	23.2403	23.0265	22.9757	23.1603	22.5676	22.9012	0.633139	-0.125267
O00506;Q9Y6E0;Q9P289	O00506;Q9Y6E0;Q9P289	Serine/threonine-protein kinase 25;Serine/threonine-protein kinase 24;Serine/threonine-protein kinase 24 36 kDa subunit;Serine/threonine-protein kinase 24 12 kDa subunit;Serine/threonine-protein kinase 26	STK25;STK24;STK26	20.9491	21.5344	21.5734	21.3523	20.0581	20.7071	19.4445	20.0699	0.0514724	-1.2824
O00541	O00541	Pescadillo homolog	PES1	23.7885	24.0666	24.1233	23.9928	23.9314	24.0405	23.8381	23.9367	0.667403	-0.0561333
O00560	O00560	Syntenin-1	SDCBP	23.6602	23.7478	23.9622	23.7901	23.9836	24.3575	23.6342	23.9918	0.446424	0.2017
O00566	O00566	U3 small nucleolar ribonucleoprotein protein MPP10	MPHOSPH10	22.0144	22.2366	22.648	22.2997	21.6084	21.5772	21.903	21.6962	0.0623565	-0.603467
O00567	O00567	Nucleolar protein 56	NOP56	24.2335	23.8657	24.1113	24.0702	24.1698	23.5448	24.2226	23.9791	0.733273	-0.0911
O00571;O15523;Q9NQI0	O00571;O15523	ATP-dependent RNA helicase DDX3X;ATP-dependent RNA helicase DDX3Y	DDX3X;DDX3Y	24.7551	25.2344	24.6894	24.893	25.0394	24.9658	24.8362	24.9471	0.788921	0.0541667
O00592	O00592	Podocalyxin	PODXL	21.8831	20.0175	20.959	20.9532	20.8513	20.0029	21.6354	20.8299	0.871692	-0.123333
O00629	O00629	Importin subunit alpha-3	KPNA4	23.9353	24.4722	24.2927	24.2334	24.5015	24.1565	23.3847	24.0142	0.593195	-0.219167
O00743	O00743	Serine/threonine-protein phosphatase 6 catalytic subunit;Serine/threonine-protein phosphatase 6 catalytic subunit, N-terminally processed	PPP6C	21.6746	22.3924	21.5259	21.8643	21.9881	22.7631	21.6132	22.1215	0.584897	0.257167
O00767	O00767	Stearoyl-CoA desaturase	SCD	20.6319	15.129	16.112	17.291	16.2278	16.0055	15.9336	16.0556	0.541913	-1.23533
O14497;Q8NFD5	O14497	AT-rich interactive domain-containing protein 1A	ARID1A	17.6885	18.2656	18.1944	18.0495	18.4434	18.7612	17.9683	18.391	0.312422	0.341467
O14556	O14556	Glyceraldehyde-3-phosphate dehydrogenase, testis-specific	GAPDHS	25.976	27.2624	26.8451	26.6945	27.0247	25.3981	24.5793	25.6674	0.29457	-1.02713
O14578	O14578	Citron Rho-interacting kinase	CIT	17.2196	18.7923	16.3271	17.4463	17.4944	16.5066	16.1399	16.7136	0.4378	-0.7327
O14579	O14579	Coatomer subunit epsilon	COPE	23.8803	24.2073	23.8388	23.9755	23.8964	24.309	23.955	24.0535	0.676966	0.078
O14617	O14617	AP-3 complex subunit delta-1	AP3D1	19.8517	19.3427	19.3258	19.5067	18.5937	18.7263	19.4135	18.9112	0.134096	-0.595567
O14647	O14647	Chromodomain-helicase-DNA-binding protein 2	CHD2	15.3907	18.3259	16.5518	16.7561	16.6012	15.9651	17.4151	16.6605	0.926395	-0.0956667
O14672	O14672	Disintegrin and metalloproteinase domain-containing protein 10	ADAM10	20.1381	16.9828	19.553	18.8913	18.5705	17.1719	19.6336	18.4587	0.738834	-0.432633
O14744	O14744	Protein arginine N-methyltransferase 5;Protein arginine N-methyltransferase 5, N-terminally processed	PRMT5	19.8071	20.7496	20.8989	20.4852	21.2484	21.1909	20.2751	20.9048	0.41819	0.4196
O14745	O14745	Na(+)/H(+) exchange regulatory cofactor NHE-RF1	NHERF1	22.9868	23.528	23.4908	23.3352	23.6281	23.6558	23.192	23.492	0.534135	0.156767
O14746	O14746	Telomerase reverse transcriptase	TERT	16.5744	17.6369	17.1686	17.1266	17.4488	17.5884	18.4999	17.8457	0.186188	0.719067
O14763	O14763	Tumor necrosis factor receptor superfamily member 10B	TNFRSF10B	16.579	17.0427	16.6472	16.7563	17.2904	17.6105	18.2679	17.7229	0.0588425	0.966633
O14773	O14773	Tripeptidyl-peptidase 1	TPP1	20.5255	20.5238	22.5901	21.2131	19.889	20.0841	19.5515	19.8415	0.179553	-1.3716
O14776	O14776	Transcription elongation regulator 1	TCERG1	21.8115	21.9933	21.1371	21.6473	22.4644	22.1489	22.423	22.3454	0.101514	0.698133
O14777	O14777	Kinetochore protein NDC80 homolog	NDC80	21.0406	20.3257	20.2953	20.5539	20.7969	21.2891	20.759	20.9483	0.262937	0.394467
O14786	O14786	Neuropilin-1	NRP1	19.0537	19.3325	19.2708	19.219	19.2089	18.3362	18.9102	18.8184	0.254156	-0.400567
O14818;Q8TAA3	O14818	Proteasome subunit alpha type-7	PSMA7	24.6714	25.3273	25.1515	25.0501	25.4048	25.3386	24.645	25.1295	0.812313	0.0794
O14828	O14828	Secretory carrier-associated membrane protein 3	SCAMP3	23.5912	22.7947	22.3685	22.9181	22.1746	23.9058	22.7767	22.9524	0.958973	0.0342333
O14880	O14880	Glutathione S-transferase 3, mitochondrial	MGST3	22.6532	17.7175	20.9412	20.4373	20.7493	20.5436	22.0862	21.1264	0.688533	0.689067
O14908	O14908	PDZ domain-containing protein GIPC1	GIPC1	16.491	20.2929	19.4764	18.7534	20.2438	20.1037	19.7346	20.0274	0.385193	1.27393
O14925;Q5SRD1	O14925	Mitochondrial import inner membrane translocase subunit Tim23	TIMM23	21.3526	16.4274	17.3311	18.3704	17.4703	20.4453	21.0193	19.645	0.536488	1.2746
O14929	O14929	Histone acetyltransferase type B catalytic subunit	HAT1	21.9674	22.4281	22.3057	22.2337	22.7575	22.2363	22.2267	22.4068	0.483229	0.1731
O14949	O14949	Cytochrome b-c1 complex subunit 8	UQCRQ	21.8272	15.8722	16.617	18.1055	16.7232	15.6238	21.4255	17.9242	0.947431	-0.1813
P19105;O14950;P24844	P19105;O14950	Myosin regulatory light chain 12A;Myosin regulatory light chain 12B	MYL12A;MYL12B	26.0063	26.3169	26.1039	26.1424	26.4421	26.7371	26.4125	26.5306	0.0493576	0.3882
O14964	O14964	Hepatocyte growth factor-regulated tyrosine kinase substrate	HGS	20.6954	19.4101	18.858	19.6545	18.9322	20.7845	20.3888	20.0352	0.652405	0.380667
O14974	O14974	Protein phosphatase 1 regulatory subunit 12A	PPP1R12A	19.976	20.8558	20.2356	20.3558	20.3371	20.864	20.4478	20.5496	0.567795	0.193833
O14979	O14979	Heterogeneous nuclear ribonucleoprotein D-like	HNRNPDL	25.1565	25.4911	25.4212	25.3563	25.8603	25.8431	25.2991	25.6675	0.232569	0.311233
O14980	O14980	Exportin-1	XPO1	22.7641	23.258	22.869	22.9637	22.9066	23.2254	23.3914	23.1745	0.366097	0.210767
O15020	O15020	Spectrin beta chain, non-erythrocytic 2	SPTBN2	19.3136	21.8707	22.1509	21.1117	20.7887	20.1262	20.0464	20.3204	0.476281	-0.7913
O15027	O15027	Protein transport protein Sec16A	SEC16A	17.0771	17.6311	17.4959	17.4014	17.5427	17.4063	17.0475	17.3322	0.771793	-0.0692
O15031	O15031	Plexin-B2	PLXNB2	19.2595	19.555	19.2315	19.3487	19.7646	19.8222	19.5373	19.708	0.0582202	0.359367
O15042	O15042	U2 snRNP-associated SURP motif-containing protein	U2SURP	20.1163	19.3283	18.8282	19.4243	19.1018	20.285	21.1227	20.1698	0.354034	0.745567
O15078	O15078	Centrosomal protein of 290 kDa	CEP290	19.4055	20.412	20.3397	20.0524	20.2795	19.7502	19.0551	19.6949	0.49843	-0.357467
O15091	O15091	Mitochondrial ribonuclease P catalytic subunit	PRORP	17.9882	16.734	16.6304	17.1175	17.3236	16.9577	17.8937	17.3917	0.627395	0.274133
O15116	O15116	U6 snRNA-associated Sm-like protein LSm1	LSM1	20.561	20.7358	20.7533	20.6834	20.7997	20.8435	20.4691	20.7041	0.886147	0.0207333
O15118	O15118	NPC intracellular cholesterol transporter 1	NPC1	17.4952	16.813	16.273	16.8604	18.7717	16.9969	18.043	17.9372	0.169061	1.0768
O15121	O15121	Sphingolipid delta(4)-desaturase DES1	DEGS1	21.5165	17.2613	21.2619	20.0132	18.3568	17.0066	21.0485	18.804	0.543366	-1.20927
O15126	O15126	Secretory carrier-associated membrane protein 1	SCAMP1	16.2088	15.8574	21.357	17.8077	18.2966	21.5177	21.2549	20.3564	0.297921	2.54867
O15127	O15127	Secretory carrier-associated membrane protein 2	SCAMP2	20.8105	16.6916	23.2292	20.2438	15.9941	20.6444	21.8314	19.49	0.787178	-0.7538
O15143	O15143	Actin-related protein 2/3 complex subunit 1B	ARPC1B	21.9113	22.415	21.0929	21.8064	21.9904	21.5868	21.7981	21.7918	0.973842	-0.0146333
O15144	O15144	Actin-related protein 2/3 complex subunit 2	ARPC2	22.9538	22.9914	22.9127	22.9526	23.0495	23.0799	22.4998	22.8764	0.725915	-0.0762333
O15145	O15145	Actin-related protein 2/3 complex subunit 3	ARPC3	24.4097	24.7457	24.5115	24.5556	24.4886	24.5036	24.2918	24.428	0.356796	-0.127633
O15155	O15155	BET1 homolog	BET1	20.4712	17.7032	18.2061	18.7935	17.1918	19.6841	20.4576	19.1112	0.819507	0.317667
O15160	O15160	DNA-directed RNA polymerases I and III subunit RPAC1	POLR1C	22.4763	24.4619	24.3328	23.757	24.1836	24.1758	23.9652	24.1082	0.639727	0.3512
O15173	O15173	Membrane-associated progesterone receptor component 2	PGRMC2	23.3653	18.5555	23.3228	21.7479	21.7231	21.9691	24.3085	22.6669	0.644248	0.919033
O15213	O15213	WD repeat-containing protein 46	WDR46	20.462	19.2953	19.8598	19.8724	21.4981	19.3468	20.1888	20.3446	0.552991	0.4722
O15226	O15226	NF-kappa-B-repressing factor	NKRF	18.9779	21.2203	20.1085	20.1022	20.391	20.4116	20.7206	20.5077	0.596667	0.4055
O15231	O15231	Zinc finger protein 185	ZNF185	22.6138	22.7739	22.7165	22.7014	23.103	23.2775	22.7792	23.0532	0.126992	0.351833
O15258	O15258	Protein RER1	RER1	20.5562	17.2769	16.7648	18.1993	15.5047	15.5855	20.3054	17.1319	0.620926	-1.06743
O15260	O15260	Surfeit locus protein 4	SURF4	23.0469	20.4277	20.937	21.4705	20.9437	21.3134	23.1444	21.8005	0.769757	0.329967
O15269	O15269	Serine palmitoyltransferase 1	SPTLC1	21.2393	19.0318	19.4772	19.9161	19.4088	18.9418	20.4606	19.6037	0.722109	-0.312367
O15294	O15294	UDP-N-acetylglucosamine--peptide N-acetylglucosaminyltransferase 110 kDa subunit	OGT	20.4152	21.056	20.7191	20.7301	20.7031	21.2009	20.6824	20.8621	0.626818	0.132033
O15321	O15321	Transmembrane 9 superfamily member 1	TM9SF1	19.7004	19.4775	16.7905	18.6561	19.4663	16.1851	16.3419	17.3311	0.404416	-1.32503
O15355	O15355	Protein phosphatase 1G	PPM1G	22.5183	22.1841	22.9234	22.5419	22.4723	22.8352	21.9913	22.4329	0.754245	-0.109
O15360	O15360	Fanconi anemia group A protein	FANCA	17.5982	16.3099	18.754	17.554	16.9388	16.3792	17.6882	17.0021	0.539443	-0.551967
O15371	O15371	Eukaryotic translation initiation factor 3 subunit D	EIF3D	24.0468	24.5177	24.294	24.2862	24.3636	24.2314	24.3041	24.2997	0.931344	0.0135333
O15372	O15372	Eukaryotic translation initiation factor 3 subunit H	EIF3H	24.3166	24.8686	24.6842	24.6231	24.9966	24.5902	24.297	24.6279	0.986182	0.0048
P25490;O15391;Q96MM3	P25490;O15391;Q96MM3	Transcriptional repressor protein YY1;Transcription factor YY2;Zinc finger protein 42 homolog	YY1;YY2;ZFP42	21.0482	21.4437	21.7483	21.4134	21.8935	21.5089	21.341	21.5811	0.55606	0.167733
O15392	O15392	Baculoviral IAP repeat-containing protein 5	BIRC5	20.2104	20.7667	21.1192	20.6988	21.4814	21.0938	20.4851	21.0201	0.459296	0.321333
O15400	O15400	Syntaxin-7	STX7	22.2047	16.4001	21.1478	19.9175	21.0259	21.9493	22.1011	21.6921	0.425714	1.77457
O15439	O15439	ATP-binding cassette sub-family C member 4	ABCC4	17.0512	16.8375	18.8483	17.579	18.1259	17.9703	15.9752	17.3571	0.825314	-0.221867
O15446	O15446	DNA-directed RNA polymerase I subunit RPA34	POLR1G	21.6084	21.7153	21.8665	21.7301	21.8882	20.535	20.9029	21.1087	0.261832	-0.621367
O15479;O15481;Q96LZ2;P43366;Q9UBF1	O15479	Melanoma-associated antigen B2	MAGEB2	24.4597	24.6707	23.9116	24.3473	24.6654	24.2743	24.2763	24.4053	0.837568	0.058
O15511	O15511	Actin-related protein 2/3 complex subunit 5	ARPC5	22.1649	22.6031	22.7511	22.5064	23.0935	23.0305	23.0194	23.0478	0.0889797	0.541433
O15514	O15514	DNA-directed RNA polymerase II subunit RPB4	POLR2D	20.5418	20.7845	17.7962	19.7075	22.8769	21.2696	21.1366	21.761	0.154937	2.05353
O15533	O15533	Tapasin	TAPBP	21.166	20.3121	20.9125	20.7969	22.0362	22.0854	21.0042	21.7086	0.110612	0.911733
O15554	O15554	Intermediate conductance calcium-activated potassium channel protein 4	KCNN4	20.7109	16.764	18.6646	18.7132	18.4375	18.0561	16.8284	17.774	0.508957	-0.939167
O43143	O43143	ATP-dependent RNA helicase DHX15	DHX15	24.4312	24.6933	24.4349	24.5198	24.4031	24.5455	24.6586	24.5357	0.89574	0.0159333
O43148	O43148	mRNA cap guanine-N7 methyltransferase	RNMT	23.0582	23.2688	23.7541	23.3604	23.7485	22.8494	23.205	23.2676	0.795081	-0.0927333
O43159	O43159	Ribosomal RNA-processing protein 8	RRP8	20.2375	20.0329	19.852	20.0408	20.8151	20.5731	20.3829	20.5904	0.0310477	0.549567
O43166	O43166	Signal-induced proliferation-associated 1-like protein 1	SIPA1L1	18.0741	16.5721	18.062	17.5694	18.2576	15.953	18.2385	17.483	0.929899	-0.0863667
O43169	O43169	Cytochrome b5 type B	CYB5B	22.6522	17.0814	21.2468	20.3268	21.039	21.7473	23.4305	22.0723	0.414699	1.74547
O43172	O43172	U4/U6 small nuclear ribonucleoprotein Prp4	PRPF4	23.4099	23.8542	23.9892	23.7511	23.7778	23.6604	23.6933	23.7105	0.839773	-0.0406
O43175	O43175	D-3-phosphoglycerate dehydrogenase	PHGDH	24.6622	25.034	24.9874	24.8945	24.884	24.7288	24.5074	24.7067	0.306022	-0.1878
O43237	O43237	Cytoplasmic dynein 1 light intermediate chain 2	DYNC1LI2	20.18	16.551	19.7716	18.8342	20.2556	19.769	20.1414	20.0553	0.398902	1.22113
O43242	O43242	26S proteasome non-ATPase regulatory subunit 3	PSMD3	22.5443	23.1269	23.1016	22.9243	23.231	22.3812	22.4954	22.7025	0.538807	-0.221733
O43251;Q9NWB1;A6NFN3	O43251;Q9NWB1;A6NFN3	RNA binding protein fox-1 homolog 2;RNA binding protein fox-1 homolog 1;RNA binding protein fox-1 homolog 3	RBFOX2;RBFOX1;RBFOX3	22.2945	22.5331	22.3424	22.39	22.547	23.3142	22.6282	22.8298	0.206218	0.4398
O43264	O43264	Centromere/kinetochore protein zw10 homolog	ZW10	20.6459	20.5655	20.0353	20.4156	21.0647	21.0722	20.7143	20.9504	0.0893427	0.534833
O43290	O43290	U4/U6.U5 tri-snRNP-associated protein 1	SART1	22.1734	22.7037	21.8607	22.2459	22.4808	22.4781	22.6712	22.5434	0.350174	0.297433
O43293	O43293	Death-associated protein kinase 3	DAPK3	19.728	21.2986	17.7854	19.604	20.936	17.1012	16.9214	18.3195	0.484069	-1.28447
O43324	O43324	Eukaryotic translation elongation factor 1 epsilon-1	EEF1E1	23.5156	23.7108	23.4738	23.5667	23.5063	23.4362	23.4087	23.4504	0.248046	-0.116333
O43390	O43390	Heterogeneous nuclear ribonucleoprotein R	HNRNPR	25.4654	25.5824	25.6377	25.5618	25.9132	25.7532	25.5229	25.7298	0.275862	0.167933
O43396	O43396	Thioredoxin-like protein 1	TXNL1	21.1078	21.7212	21.3398	21.3896	22.2508	21.6188	21.0664	21.6453	0.554818	0.255733
O43402	O43402	ER membrane protein complex subunit 8	EMC8	23.0967	22.8861	22.9545	22.9791	23.0309	23.2972	22.7633	23.0305	0.780015	0.0513667
O43447	O43447	Peptidyl-prolyl cis-trans isomerase H	PPIH	22.9464	23.3331	22.9653	23.0816	23.0141	23.2246	22.8783	23.039	0.805247	-0.0426
O43464	O43464	Serine protease HTRA2, mitochondrial	HTRA2	20.9441	20.9664	18.7995	20.2367	21.5693	21.369	20.5297	21.156	0.333288	0.919333
O43491	O43491	Band 4.1-like protein 2	EPB41L2	22.1335	22.8804	22.7285	22.5808	22.7688	22.6336	22.4021	22.6015	0.939927	0.0207
O43615	O43615	Mitochondrial import inner membrane translocase subunit TIM44	TIMM44	21.9683	21.6097	21.425	21.6677	22.0019	21.3091	22.1191	21.81	0.662979	0.142367
O43617	O43617	Trafficking protein particle complex subunit 3	TRAPPC3	21.7509	21.4255	21.746	21.6408	21.6234	22.3837	21.6901	21.8991	0.408678	0.258267
O43657	O43657	Tetraspanin-6	TSPAN6	20.1159	20.1459	19.8813	20.0477	16.8791	19.8607	21.0045	19.2481	0.582503	-0.7996
O43660	O43660	Pleiotropic regulator 1	PLRG1	22.3637	22.9454	22.9324	22.7472	22.4175	22.6821	22.4683	22.5226	0.367857	-0.224533
O43663	O43663	Protein regulator of cytokinesis 1	PRC1	20.3109	19.1118	19.2684	19.5637	19.4662	20.173	20.6622	20.1005	0.353983	0.536767
O43670	O43670	BUB3-interacting and GLEBS motif-containing protein ZNF207	ZNF207	24.3085	22.2889	21.939	22.8455	22.0507	23.3156	23.3693	22.9119	0.942672	0.0664
O43674	O43674	NADH dehydrogenase [ubiquinone] 1 beta subcomplex subunit 5, mitochondrial	NDUFB5	19.8431	16.069	16.0395	17.3172	17.7765	15.3113	20.2237	17.7705	0.823211	0.4533
O43681	O43681	ATPase GET3	GET3	19.7303	20.8401	20.2615	20.2773	20.3882	19.8099	19.9207	20.0396	0.560917	-0.2377
O43684	O43684	Mitotic checkpoint protein BUB3	BUB3	25.2372	26.1413	26.05	25.8095	26.0679	26.2893	25.3897	25.9156	0.80137	0.106133
O43707	O43707	Alpha-actinin-4	ACTN4	28.0809	28.7312	28.4342	28.4154	28.594	28.673	28.1747	28.4806	0.802697	0.0651333
O43747	O43747	AP-1 complex subunit gamma-1	AP1G1	21.161	21.5591	21.5588	21.4263	21.8214	21.9187	21.8872	21.8758	0.0711233	0.449467
O43752	O43752	Syntaxin-6	STX6	19.1849	18.2196	19.9256	19.11	19.6767	17.5009	19.1347	18.7708	0.701611	-0.339267
O43760	O43760	Synaptogyrin-2	SYNGR2	22.1486	17.4264	16.4251	18.6667	17.8191	20.4834	21.9613	20.0879	0.547463	1.42123
O43776	O43776	Asparagine--tRNA ligase, cytoplasmic	NARS1	17.611	18.6861	17.6598	17.9856	18.3216	19.5247	20.226	19.3574	0.118066	1.3718
O43795;Q9UBC5	O43795	Unconventional myosin-Ib	MYO1B	22.7345	23.1751	22.9058	22.9385	22.6539	22.6722	22.495	22.607	0.106931	-0.331433
O43809	O43809	Cleavage and polyadenylation specificity factor subunit 5	NUDT21	24.9405	25.2961	25.2427	25.1598	25.352	25.8836	24.8044	25.3467	0.618615	0.1869
O43815;Q13033	O43815	Striatin	STRN	19.4859	22.108	21.9727	21.1889	22.0828	22.0802	21.3582	21.8404	0.529278	0.651533
O43818	O43818	U3 small nucleolar RNA-interacting protein 2	RRP9	23.9794	24.3364	23.8979	24.0712	23.7485	24.1205	24.0618	23.9769	0.62376	-0.0943
O43823	O43823	A-kinase anchor protein 8	AKAP8	19.9695	21.3698	20.0392	20.4595	20.7913	21.2856	21.0732	21.05	0.323851	0.590533
O43837	O43837	Isocitrate dehydrogenase [NAD] subunit beta, mitochondrial	IDH3B	21.1995	21.5177	21.311	21.3427	21.5541	21.3676	21.6742	21.532	0.216475	0.189233
O43852	O43852	Calumenin	CALU	21.652	21.7422	21.881	21.7584	21.9161	21.8725	19.7235	21.1707	0.502392	-0.5877
O43854	O43854	EGF-like repeat and discoidin I-like domain-containing protein 3	EDIL3	18.2114	15.2704	16.9223	16.8014	16.9741	17.978	17.6928	17.5483	0.479598	0.746933
O43865;Q96HN2	O43865;Q96HN2	S-adenosylhomocysteine hydrolase-like protein 1;Adenosylhomocysteinase 3	AHCYL1;AHCYL2	18.8562	18.8941	16.4117	18.054	19.1645	19.1066	18.709	18.9934	0.371074	0.939367
O43913	O43913	Origin recognition complex subunit 5	ORC5	21.0043	22.3257	22.5057	21.9452	22.457	18.7165	20.1321	20.4352	0.301492	-1.51003
O60216;Q9H4I0	O60216	Double-strand-break repair protein rad21 homolog;64-kDa C-terminal product	RAD21	21.2909	20.8585	21.4237	21.191	21.0788	21.2137	21.6159	21.3028	0.658997	0.111767
O60231	O60231	Pre-mRNA-splicing factor ATP-dependent RNA helicase DHX16	DHX16	20.4259	20.1466	19.2974	19.9566	19.1133	20.1132	20.4476	19.8914	0.907248	-0.0652667
O60244	O60244	Mediator of RNA polymerase II transcription subunit 14	MED14	14.9585	16.5155	16.9862	16.1534	15.7814	16.0309	15.9148	15.909	0.729381	-0.244367
O60256	O60256	Phosphoribosyl pyrophosphate synthase-associated protein 2	PRPSAP2	19.8195	20.415	18.4258	19.5534	19.6366	19.7787	19.6007	19.672	0.85949	0.118567
O60264	O60264	SWI/SNF-related matrix-associated actin-dependent regulator of chromatin subfamily A member 5	SMARCA5	22.4267	21.6252	21.2163	21.7561	21.5063	21.9958	22.9808	22.161	0.511603	0.4049
O60287	O60287	Nucleolar pre-ribosomal-associated protein 1	URB1	18.2546	18.6199	15.7967	17.5571	18.331	17.5617	18.2564	18.0497	0.639476	0.492633
O60306	O60306	RNA helicase aquarius	AQR	19.4152	19.4169	18.7387	19.1903	19.69	19.8613	20.2292	19.9268	0.0626694	0.736567
O60313	O60313	Dynamin-like 120 kDa protein, mitochondrial;Dynamin-like 120 kDa protein, form S1	OPA1	22.1585	22.35	22.3174	22.2753	22.4108	21.7164	21.7796	21.9689	0.299302	-0.306367
O60341	O60341	Lysine-specific histone demethylase 1A	KDM1A	18.6132	18.9577	19.3481	18.973	19.3185	20.2505	19.7679	19.779	0.0819266	0.805967
O60506	O60506	Heterogeneous nuclear ribonucleoprotein Q	SYNCRIP	26.2312	26.4367	26.2866	26.3182	26.6204	26.3639	26.3593	26.4479	0.294446	0.1297
O60524	O60524	Ribosome quality control complex subunit NEMF	NEMF	19.1983	19.447	19.0832	19.2428	19.314	16.3402	19.0603	18.2382	0.40195	-1.00467
O60563	O60563	Cyclin-T1	CCNT1	19.9468	19.7394	16.0314	18.5725	20.5277	16.3257	16.5311	17.7948	0.698612	-0.7777
O60568	O60568	Multifunctional procollagen lysine hydroxylase and glycosyltransferase LH3;Procollagen-lysine,2-oxoglutarate 5-dioxygenase 3;Procollagen glycosyltransferase	PLOD3	24.079	24.4046	24.1144	24.1993	24.6005	24.3969	24.2228	24.4067	0.239597	0.2074
O60573	O60573	Eukaryotic translation initiation factor 4E type 2	EIF4E2	18.7954	16.6881	17.8317	17.7717	17.7407	17.9072	17.651	17.7663	0.993718	-0.00543333
O60613	O60613	Selenoprotein F	SELENOF	21.3289	20.8598	15.7126	19.3004	20.8832	21.0109	20.7311	20.8751	0.473794	1.57463
O60645	O60645	Exocyst complex component 3	EXOC3	18.6451	18.7134	18.7912	18.7166	19.1275	18.7476	18.2937	18.7229	0.981482	0.00636667
O60664	O60664	Perilipin-3	PLIN3	19.9109	19.4496	19.5178	19.6261	19.816	20.3005	19.1004	19.739	0.786508	0.112867
O60684;O15131	O60684;O15131	Importin subunit alpha-7;Importin subunit alpha-6	KPNA6;KPNA5	22.5781	23.0004	22.9184	22.8323	22.4162	22.4736	22.8853	22.5917	0.288674	-0.2406
O60701	O60701	UDP-glucose 6-dehydrogenase	UGDH	19.5607	18.6993	20.3221	19.5274	18.8416	20.1554	19.5003	19.4991	0.96495	-0.0282667
O60711	O60711	Leupaxin	LPXN	20.195	19.8333	20.1439	20.0574	16.4319	20.1152	20.2419	18.9297	0.462241	-1.12773
O60716	O60716	Catenin delta-1	CTNND1	23.3728	23.773	23.4346	23.5268	23.1663	23.1053	23.0409	23.1042	0.0668455	-0.422633
O60762	O60762	Dolichol-phosphate mannosyltransferase subunit 1	DPM1	22.1538	15.801	21.256	19.7369	17.8858	19.2224	20.1533	19.0872	0.780659	-0.649767
O60763;REV__Q5VZ89	O60763	General vesicular transport factor p115	USO1	20.5759	21.3186	21.033	20.9758	20.8495	20.8903	20.5485	20.7628	0.44417	-0.213067
O60783	O60783	Small ribosomal subunit protein uS14m	MRPS14	21.0958	16.279	16.8603	18.0784	21.3268	21.3215	20.7632	21.1372	0.179754	3.0588
O60784	O60784	Target of Myb1 membrane trafficking protein	TOM1	20.4642	19.7647	20.9714	20.4001	20.261	21.8534	19.0667	20.3937	0.994695	-0.0064
O60814;P57053	O60814;P57053	Histone H2B type 1-K;Histone H2B type F-S	H2BC12;H2BC12L	21.957	19.8209	19.8055	20.5278	20.747	21.8218	20.0083	20.859	0.729527	0.331233
O60826	O60826	Coiled-coil domain-containing protein 22	CCDC22	18.9779	20.8376	20.2644	20.0266	20.7924	20.5378	18.5218	19.9507	0.937364	-0.0759667
O60828	O60828	Polyglutamine-binding protein 1	PQBP1	23.8258	24.3685	24.4362	24.2102	24.8003	24.497	23.4752	24.2575	0.922252	0.0473333
O60831	O60831	PRA1 family protein 2	PRAF2	16.6214	23.4218	23.3498	21.131	23.2434	17.1303	17.6216	19.3318	0.580165	-1.79923
O60832	O60832	H/ACA ribonucleoprotein complex subunit DKC1	DKC1	23.8617	24.1058	24.0466	24.0047	23.8196	24.6307	24.0559	24.1687	0.572329	0.164033
O60841	O60841	Eukaryotic translation initiation factor 5B	EIF5B	23.433	23.6206	23.1055	23.3864	23.9455	23.3928	23.7838	23.7074	0.223331	0.321
O60869	O60869	Endothelial differentiation-related factor 1	EDF1	23.1413	23.2303	23.1243	23.1653	23.444	23.4198	23.2585	23.3741	0.04886	0.2088
O60884	O60884	DnaJ homolog subfamily A member 2	DNAJA2	23.5514	24.3061	24.3869	24.0815	24.1529	24.5595	23.5252	24.0792	0.995771	-0.00226667
O60885;Q15059	O60885	Bromodomain-containing protein 4	BRD4	18.5408	21.8028	20.7755	20.373	20.4239	18.7475	18.9998	19.3904	0.434141	-0.982633
O60925	O60925	Prefoldin subunit 1	PFDN1	15.5904	16.5833	17.2421	16.4719	19.4244	20.1277	16.6388	18.7303	0.155983	2.25837
O60934	O60934	Nibrin	NBN	16.9743	17.1681	18.5055	17.5493	17.493	18.7184	18.2166	18.1427	0.382077	0.593367
O75027	O75027	Iron-sulfur clusters transporter ABCB7, mitochondrial	ABCB7	19.7082	17.2191	17.6141	18.1805	20.452	16.3599	20.4672	19.093	0.599893	0.912567
O75063	O75063	Glycosaminoglycan xylosylkinase	FAM20B	16.4091	18.6087	17.5342	17.5173	18.4457	16.6772	17.2019	17.4416	0.931303	-0.0757333
O75083	O75083	WD repeat-containing protein 1	WDR1	20.0163	21.5253	21.0748	20.8721	21.9377	21.3919	20.2905	21.2067	0.638706	0.334567
O75116	O75116	Rho-associated protein kinase 2	ROCK2	19.3132	19.0937	18.6812	19.0294	18.4345	15.9491	18.39	17.5912	0.218039	-1.43817
O75122	O75122	CLIP-associating protein 2	CLASP2	17.817	16.0505	17.8497	17.2391	17.5733	17.2436	16.859	17.2253	0.984183	-0.0137667
O75127	O75127	Pentatricopeptide repeat-containing protein 1, mitochondrial	PTCD1	16.7405	17.2423	17.2963	17.093	17.2851	15.3348	16.0127	16.2109	0.259053	-0.882167
O75131;Q96A23;Q9UBL6;Q8IYJ1;Q96FN4;Q9HCH3;O95741	O75131	Copine-3	CPNE3	23.8256	24.1142	23.9161	23.952	23.919	23.7526	23.8175	23.8297	0.296466	-0.122267
O75146	O75146	Huntingtin-interacting protein 1-related protein	HIP1R	18.9834	20.3743	18.8295	19.3957	19.8152	20.1522	19.6713	19.8796	0.431544	0.483833
O75150	O75150	E3 ubiquitin-protein ligase BRE1B	RNF40	16.6266	15.9973	17.733	16.7856	17.9675	17.0314	15.7768	16.9252	0.872306	0.1396
O75152;P0DQW0;A0A1B0GTU1	O75152;P0DQW0	Zinc finger CCCH domain-containing protein 11A;Zinc finger CCCH domain-containing protein 11C	ZC3H11A;ZC3H11C	17.1998	17.5943	17.3509	17.3817	15.8362	17.1311	18.5312	17.1662	0.808862	-0.2155
O75153;Q9Y5I4	O75153	Clustered mitochondria protein homolog	CLUH	19.5385	18.1879	18.9066	18.8777	17.6482	19.2868	19.1496	18.6949	0.794787	-0.1828
O75165	O75165	DnaJ homolog subfamily C member 13	DNAJC13	15.3907	18.6186	18.1066	17.372	15.5734	14.8841	15.3127	15.2567	0.164662	-2.11523
O75175	O75175	CCR4-NOT transcription complex subunit 3	CNOT3	20.5642	19.755	18.1337	19.4843	18.0412	17.2671	19.6705	18.3263	0.313863	-1.15803
O75208	O75208	Ubiquinone biosynthesis protein COQ9, mitochondrial	COQ9	19.3684	19.0422	16.474	18.2949	15.9843	19.1436	19.3627	18.1635	0.9311	-0.131333
O75251	O75251	NADH dehydrogenase [ubiquinone] iron-sulfur protein 7, mitochondrial	NDUFS7	19.7072	18.254	19.3691	19.1101	17.2262	19.6453	16.1037	17.6584	0.299709	-1.4517
O75306	O75306	NADH dehydrogenase [ubiquinone] iron-sulfur protein 2, mitochondrial	NDUFS2	21.5936	21.0279	19.249	20.6235	18.7792	19.3177	19.3741	19.157	0.166588	-1.4665
O75323	O75323	Protein NipSnap homolog 2	NIPSNAP2	19.1918	16.227	19.1787	18.1992	16.9433	19.58	19.455	18.6594	0.742932	0.460267
O75326	O75326	Semaphorin-7A	SEMA7A	18.2882	17.5652	18.5925	18.1486	17.6643	16.9237	15.6763	16.7548	0.12256	-1.39387
O75340	O75340	Programmed cell death protein 6	PDCD6	22.3349	19.1442	21.5457	21.0083	21.0928	23.0739	21.4511	21.8726	0.496463	0.864333
O75348;O95670	O75348	V-type proton ATPase subunit G 1	ATP6V1G1	24.0004	24.2071	23.9701	24.0592	24.2364	24.7197	24.535	24.497	0.0698348	0.437833
O75352	O75352	Mannose-P-dolichol utilization defect 1 protein	MPDU1	22.2577	20.6376	16.9557	19.9503	20.313	20.9717	22.3081	21.1976	0.519086	1.24727
O75367	O75367	Core histone macro-H2A.1	MACROH2A1	24.9635	24.8116	24.5862	24.7871	25.4213	24.7679	25.2768	25.1553	0.198935	0.368233
O75369	O75369	Filamin-B	FLNB	21.9184	23.4538	23.2086	22.8603	23.4239	22.604	21.7184	22.5821	0.705512	-0.278167
O75380	O75380	NADH dehydrogenase [ubiquinone] iron-sulfur protein 6, mitochondrial	NDUFS6	20.968	21.3903	20.9122	21.0902	20.5464	21.0696	20.5002	20.7054	0.182159	-0.384767
O75381	O75381	Peroxisomal membrane protein PEX14	PEX14	21.775	19.8671	20.2529	20.6317	16.6683	16.6586	21.7676	18.3648	0.313711	-2.26683
O75390	O75390	Citrate synthase, mitochondrial	CS	24.462	24.0966	24.4056	24.3214	24.4557	24.7755	24.4645	24.5652	0.190723	0.243833
O75396	O75396	Vesicle-trafficking protein SEC22b	SEC22B	25.9982	24.6944	24.7216	25.1381	23.5407	24.6986	25.7476	24.6623	0.573956	-0.475767
O75400	O75400	Pre-mRNA-processing factor 40 homolog A	PRPF40A	23.1517	24.0929	23.9638	23.7361	23.8409	24.2634	23.6124	23.9056	0.658417	0.169433
O75410;O95359	O75410;O95359	Transforming acidic coiled-coil-containing protein 1;Transforming acidic coiled-coil-containing protein 2	TACC1;TACC2	19.6703	18.1067	20.0867	19.2879	18.3435	20.2574	19.3728	19.3246	0.96641	0.0366667
O75431	O75431	Metaxin-2	MTX2	22.1615	23.049	22.712	22.6408	21.7576	22.5534	20.7218	21.6776	0.204126	-0.963233
O75436	O75436	Vacuolar protein sorting-associated protein 26A	VPS26A	23.9465	24.5508	24.3751	24.2908	24.7272	24.0666	23.3595	24.0511	0.621669	-0.2397
O75446	O75446	Histone deacetylase complex subunit SAP30	SAP30	21.7946	21.5318	21.2363	21.5209	22.4071	22.814	22.2998	22.507	0.0118366	0.986067
O75448	O75448	Mediator of RNA polymerase II transcription subunit 24	MED24	18.0232	19.1017	18.8895	18.6715	17.6506	18.6998	18.9885	18.4463	0.690154	-0.225167
O75475;P51858	O75475	PC4 and SFRS1-interacting protein	PSIP1	20.6954	20.0931	20.5898	20.4594	21.807	20.6451	21.5058	21.3193	0.115872	0.859867
O75477	O75477	Erlin-1	ERLIN1	24.1197	22.1091	22.3499	22.8596	22.2705	21.303	23.709	22.4275	0.671014	-0.432067
O75487	O75487	Glypican-4;Secreted glypican-4	GPC4	20.5506	21.1937	21.1107	20.9517	20.6168	21.4867	20.6821	20.9285	0.95006	-0.0231333
O75489	O75489	NADH dehydrogenase [ubiquinone] iron-sulfur protein 3, mitochondrial	NDUFS3	21.3069	21.9449	21.4233	21.5584	22.2043	20.8592	22.0332	21.6989	0.783832	0.140533
O75494;Q8WXF0	O75494	Serine/arginine-rich splicing factor 10	SRSF10	24.7771	25.5504	25.1626	25.1634	26.0876	25.8913	25.5105	25.8298	0.0808329	0.666433
O75521	O75521	Enoyl-CoA delta isomerase 2	ECI2	19.3312	20.0905	19.6627	19.6948	21.3079	19.3654	18.9823	19.8852	0.820597	0.1904
O75525	O75525	KH domain-containing, RNA-binding, signal transduction-associated protein 3	KHDRBS3	23.9605	24.1931	24.0221	24.0586	24.211	24.0327	23.8006	24.0148	0.769881	-0.0438
O75528	O75528	Transcriptional adapter 3	TADA3	18.2261	16.8299	16.5318	17.1959	16.4573	16.4623	15.8832	16.2676	0.210374	-0.928333
O75530	O75530	Polycomb protein EED	EED	19.2211	18.8561	19.874	19.3171	19.3415	19.4079	19.6245	19.458	0.688167	0.1409
O75531	O75531	Barrier-to-autointegration factor;Barrier-to-autointegration factor, N-terminally processed	BANF1	23.5808	23.5615	22.7793	23.3072	23.1838	24.2032	23.7875	23.7248	0.352428	0.417633
O75533	O75533	Splicing factor 3B subunit 1	SF3B1	23.3868	23.3443	23.2946	23.3419	23.62	23.1901	23.7048	23.505	0.414178	0.163067
O75534	O75534	Cold shock domain-containing protein E1	CSDE1	23.2959	23.995	23.7478	23.6796	23.7144	23.881	23.1412	23.5789	0.756805	-0.1007
O75569	O75569	Interferon-inducible double-stranded RNA-dependent protein kinase activator A	PRKRA	21.8568	22.5929	23.1483	22.5327	22.3123	22.3013	22.2287	22.2808	0.570324	-0.2519
O75607	O75607	Nucleoplasmin-3	NPM3	26.2565	26.773	26.3137	26.4477	26.5311	26.4492	25.8285	26.2696	0.556084	-0.178133
O75616	O75616	GTPase Era, mitochondrial	ERAL1	19.4103	19.8379	17.2197	18.8226	20.0193	19.568	19.6829	19.7567	0.368359	0.9341
O75643	O75643	U5 small nuclear ribonucleoprotein 200 kDa helicase	SNRNP200	24.0344	24.5804	24.413	24.3426	24.7889	24.1365	24.371	24.4321	0.738782	0.0895333
O75683	O75683	Surfeit locus protein 6	SURF6	19.969	19.2748	20.0573	19.767	20.5511	21.1151	14.9221	18.8628	0.693239	-0.904267
O75694	O75694	Nuclear pore complex protein Nup155	NUP155	22.7552	23.2478	23.2444	23.0825	23.0168	23.3497	22.8845	23.0837	0.995808	0.0012
O75695	O75695	Protein XRP2	RP2	20.6118	18.9961	19.1344	19.5808	17.0485	18.7973	19.9154	18.5871	0.378974	-0.9937
O75717	O75717	WD repeat and HMG-box DNA-binding protein 1	WDHD1	17.6427	17.5737	17.8499	17.6888	18.5167	17.2661	17.6745	17.8191	0.760076	0.130333
O75718	O75718	Cartilage-associated protein	CRTAP	23.3082	23.5093	23.5897	23.4691	23.7046	23.093	23.13	23.3092	0.516575	-0.159867
O75746	O75746	Electrogenic aspartate/glutamate antiporter SLC25A12, mitochondrial	SLC25A12	20.2109	16.8693	18.6712	18.5838	16.7577	18.0882	19.6174	18.1544	0.75284	-0.429367
O75787	O75787	Renin receptor;Renin receptor N-terminal fragment;Renin receptor C-terminal fragment	ATP6AP2	20.034	15.7375	16.6459	17.4725	17.7817	15.9212	20.0284	17.9104	0.816461	0.437967
O75817	O75817	Ribonuclease P protein subunit p20	POP7	16.5582	22.4133	16.2562	18.4092	22.1973	16.4655	21.9382	20.2003	0.549175	1.7911
O75818	O75818	Ribonuclease P protein subunit p40	RPP40	20.9605	21.4428	18.6042	20.3358	21.5748	21.5193	20.9531	21.3491	0.367442	1.01323
O75821	O75821	Eukaryotic translation initiation factor 3 subunit G	EIF3G	24.4906	25.1185	24.6762	24.7618	25.0487	24.1953	24.1344	24.4595	0.443585	-0.3023
O75822	O75822	Eukaryotic translation initiation factor 3 subunit J	EIF3J	24.4334	24.6579	24.5471	24.5461	24.9053	24.9796	24.4721	24.7857	0.266827	0.239533
O75844	O75844	CAAX prenyl protease 1 homolog	ZMPSTE24	20.5782	18.519	19.709	19.6021	18.2062	17.5136	21.328	19.0159	0.686559	-0.586133
O75874;P48735	O75874	Isocitrate dehydrogenase [NADP] cytoplasmic	IDH1	21.0117	21.4013	20.4166	20.9432	19.3097	21.7623	20.7635	20.6118	0.698811	-0.331367
O75880	O75880	Protein SCO1 homolog, mitochondrial	SCO1	19.3124	17.0961	18.2655	18.2247	19.0408	18.5638	18.3554	18.6533	0.578875	0.428667
O75915	O75915	PRA1 family protein 3	ARL6IP5	21.8107	21.3762	21.2592	21.482	21.9764	21.923	21.8572	21.9189	0.115834	0.436833
O75934	O75934	Pre-mRNA-splicing factor SPF27	BCAS2	24.8614	25.4212	25.408	25.2302	25.1844	25.8909	25.093	25.3894	0.639385	0.159233
O75935	O75935	Dynactin subunit 3	DCTN3	22.4209	22.6328	22.5053	22.5197	22.2935	21.3731	19.8098	21.1588	0.200526	-1.36087
O75937	O75937	DnaJ homolog subfamily C member 8	DNAJC8	21.6018	22.3729	19.7594	21.2447	20.2395	19.887	19.4274	19.8513	0.207906	-1.3934
O75940	O75940	Survival of motor neuron-related-splicing factor 30	SMNDC1	22.4123	22.7505	23.2829	22.8152	22.3762	22.8421	22.1579	22.4587	0.335719	-0.3565
O75947	O75947	ATP synthase subunit d, mitochondrial	ATP5PD	24.7967	23.9815	24.1801	24.3194	23.5857	23.7766	24.4656	23.9426	0.358076	-0.3768
O75955	O75955	Flotillin-1	FLOT1	22.0949	21.9622	22.4224	22.1598	21.6756	21.4663	22.0925	21.7448	0.150483	-0.415033
O75964	O75964	ATP synthase subunit g, mitochondrial	ATP5MG	22.916	16.7508	16.8504	18.8391	22.2546	20.9518	22.7815	21.996	0.258236	3.1569
O75976	O75976	Carboxypeptidase D	CPD	25.7853	26.9752	27.0705	26.6103	26.5279	25.4594	24.8079	25.5984	0.196958	-1.01193
O76021	O76021	Ribosomal L1 domain-containing protein 1	RSL1D1	26.0063	25.902	26.3325	26.0803	26.6021	26.6632	26.204	26.4898	0.102832	0.4095
O76024	O76024	Wolframin	WFS1	18.6393	17.4851	17.6071	17.9105	17.1025	15.293	18.2037	16.8664	0.348263	-1.0441
O76031	O76031	ATP-dependent Clp protease ATP-binding subunit clpX-like, mitochondrial	CLPX	19.9807	20.8058	20.3853	20.3906	21.0256	21.0254	20.7193	20.9234	0.141659	0.532833
O76071	O76071	Probable cytosolic iron-sulfur protein assembly protein CIAO1	CIAO1	21.1625	21.8579	20.0823	21.0342	18.7301	22.3262	21.2072	20.7545	0.828586	-0.279733
O76094	O76094	Signal recognition particle subunit SRP72	SRP72	24.3513	24.6222	24.244	24.4058	24.7191	24.7075	24.3495	24.592	0.323746	0.1862
O94763	O94763	Unconventional prefoldin RPB5 interactor 1	URI1	21.3561	23.1804	23.1977	22.5781	22.5894	21.7141	21.1959	21.8331	0.375388	-0.744933
O94776	O94776	Metastasis-associated protein MTA2	MTA2	22.8188	23.3514	23.1837	23.118	23.2512	23.1699	22.7221	23.0477	0.773024	-0.0702333
O94782	O94782	Ubiquitin carboxyl-terminal hydrolase 1;Ubiquitin carboxyl-terminal hydrolase 1, N-terminal fragment	USP1	20.9038	21.4735	21.959	21.4454	21.5114	20.7882	20.036	20.7785	0.278522	-0.6669
O94822	O94822	E3 ubiquitin-protein ligase listerin	LTN1	16.484	17.198	17.3102	16.9974	16.9112	17.6162	17.5723	17.3666	0.345607	0.369167
O94826	O94826	Mitochondrial import receptor subunit TOM70	TOMM70	23.8443	21.3046	22.7079	22.6189	22.0686	21.2005	23.4706	22.2466	0.725689	-0.372367
O94832	O94832	Unconventional myosin-Id	MYO1D	19.0831	19.5761	19.8589	19.506	19.2917	18.6357	18.6198	18.8491	0.106842	-0.656967
O94842;Q96NM4;O15405;O94900	O94842;Q96NM4;O15405	TOX high mobility group box family member 4;TOX high mobility group box family member 2;TOX high mobility group box family member 3	TOX4;TOX2;TOX3	19.9611	20.0712	18.247	19.4264	17.3727	19.1862	19.3045	18.6211	0.40224	-0.8053
O94851;Q7RTP6	O94851	[F-actin]-monooxygenase MICAL2	MICAL2	17.4856	16.5931	16.3111	16.7966	18.1919	17.3246	17.617	17.7112	0.110984	0.914567
O94874	O94874	E3 UFM1-protein ligase 1	UFL1	19.8664	19.7455	19.9789	19.8636	20.0853	18.5316	19.7618	19.4596	0.484006	-0.404033
O94885	O94885	SAM and SH3 domain-containing protein 1	SASH1	17.5421	16.2548	18.2682	17.355	18.3918	17.4718	17.6959	17.8532	0.502388	0.498133
O94901	O94901	SUN domain-containing protein 1	SUN1	16.4419	16.6557	17.0377	16.7118	17.8503	19.1901	17.6698	18.2367	0.0724408	1.52497
O94906	O94906	Pre-mRNA-processing factor 6	PRPF6	21.9577	21.1799	21.1657	21.4344	21.4388	21.0043	22.2344	21.5592	0.794483	0.124733
O94913	O94913	Pre-mRNA cleavage complex 2 protein Pcf11	PCF11	16.9358	16.3568	16.215	16.5025	17.0602	16.5086	16.2084	16.5924	0.800746	0.0898667
O94919	O94919	Endonuclease domain-containing 1 protein	ENDOD1	19.3541	19.247	19.3696	19.3236	19.3455	19.732	19.1279	19.4018	0.704156	0.0782333
O94925	O94925	Glutaminase kidney isoform, mitochondrial;Glutaminase kidney isoform, mitochondrial 68 kDa chain;Glutaminase kidney isoform, mitochondrial 65 kDa chain	GLS	23.7651	23.9911	23.7638	23.84	24.0003	24.1306	23.744	23.9583	0.441448	0.1183
O94973	O94973	AP-2 complex subunit alpha-2	AP2A2	19.2911	19.1707	20.2346	19.5655	19.1359	19.5147	19.2888	19.3131	0.538289	-0.252333
O94992	O94992	Protein HEXIM1	HEXIM1	22.3029	22.8093	22.6988	22.6037	23.27	22.7414	22.031	22.6808	0.857283	0.0771333
O95070	O95070	Protein YIF1A	YIF1A	17.3296	16.9561	16.7547	17.0135	17.7279	16.675	18.423	17.6086	0.363866	0.595167
O95159	O95159	Zinc finger protein-like 1	ZFPL1	21.1966	19.7433	20.4262	20.4554	20.7329	20.2492	21.4431	20.8084	0.553244	0.353033
O95163	O95163	Elongator complex protein 1	ELP1	17.9703	18.3236	17.9578	18.0839	17.0465	18.0918	17.7511	17.6298	0.275933	-0.4541
O95197	O95197	Reticulon-3	RTN3	19.5589	19.6954	19.0202	19.4248	19.7379	19.7403	19.8462	19.7748	0.229239	0.349967
O95202	O95202	Mitochondrial proton/calcium exchanger protein	LETM1	21.3344	18.1324	16.807	18.7579	19.1258	18.1846	20.5415	19.284	0.750509	0.526033
O95218	O95218	Zinc finger Ran-binding domain-containing protein 2	ZRANB2	22.4904	23.0213	22.7343	22.7487	23.0627	23.3397	22.579	22.9938	0.421391	0.245133
O95232	O95232	Luc7-like protein 3	LUC7L3	23.5222	24.0173	21.5956	23.045	22.094	22.9646	23.2559	22.7715	0.76088	-0.273533
O95235	O95235	Kinesin-like protein KIF20A	KIF20A	16.7575	17.7258	17.0777	17.187	17.0532	16.4083	16.4825	16.648	0.205845	-0.539
O95239;Q2VIQ3;Q9Y496;Q6ZMV9	O95239	Chromosome-associated kinesin KIF4A	KIF4A	21.5594	18.1831	18.8266	19.523	20.4591	19.8715	21.5416	20.6241	0.410439	1.10103
O95251	O95251	Histone acetyltransferase KAT7	KAT7	19.8367	17.8923	16.9909	18.24	17.6553	17.4143	18.1452	17.7383	0.615204	-0.5017
O95292	O95292	Vesicle-associated membrane protein-associated protein B/C	VAPB	22.3434	19.6923	19.7005	20.5787	19.4338	21.0661	22.4998	20.9999	0.75314	0.421167
O95295	O95295	SNARE-associated protein Snapin	SNAPIN	16.9875	18.337	17.2021	17.5089	18.2454	20.6033	17.7746	18.8744	0.257795	1.36557
O95297	O95297	Myelin protein zero-like protein 1	MPZL1	20.6006	18.6153	20.6998	19.9719	20.3133	19.4762	19.9004	19.8966	0.924617	-0.0752667
O95299	O95299	NADH dehydrogenase [ubiquinone] 1 alpha subcomplex subunit 10, mitochondrial	NDUFA10	21.4782	20.1377	21.6558	21.0906	22.0917	21.5102	21.4963	21.6994	0.334357	0.608833
O95340;O43252	O95340	Bifunctional 3-phosphoadenosine 5-phosphosulfate synthase 2;Sulfate adenylyltransferase;Adenylyl-sulfate kinase	PAPSS2	18.481	18.1114	18.088	18.2268	17.1183	17.5868	19.5578	18.0876	0.870461	-0.139167
O95347	O95347	Structural maintenance of chromosomes protein 2	SMC2	22.5386	22.3508	23.0021	22.6305	22.4831	22.2919	22.6271	22.4674	0.506856	-0.163133
O95373;O15397	O95373	Importin-7	IPO7	21.3084	21.6434	21.1117	21.3545	21.247	21.2771	21.614	21.3794	0.904988	0.0248667
O95400	O95400	CD2 antigen cytoplasmic tail-binding protein 2	CD2BP2	23.5781	23.5999	23.8633	23.6804	23.8794	23.5543	23.1709	23.5349	0.566154	-0.145567
O95433	O95433	Activator of 90 kDa heat shock protein ATPase homolog 1	AHSA1	20.6824	20.949	20.5746	20.7353	20.5496	20.6951	19.6653	20.3033	0.310836	-0.432
O95453	O95453	Poly(A)-specific ribonuclease PARN	PARN	19.5997	20.6064	20.601	20.269	20.6885	19.9854	19.9194	20.1978	0.872817	-0.0712667
O95456	O95456	Proteasome assembly chaperone 1	PSMG1	20.0179	16.9623	19.8699	18.95	20.2478	19.7318	19.2812	19.7536	0.508386	0.803567
O95470	O95470	Sphingosine-1-phosphate lyase 1	SGPL1	22.8441	22.6644	22.858	22.7888	22.1188	21.4224	22.4998	22.0137	0.128355	-0.775167
O95478	O95478	Ribosome biogenesis protein NSA2 homolog	NSA2	21.2849	21.8483	21.6361	21.5898	21.9665	22.1525	21.0306	21.7165	0.764083	0.126767
O95487	O95487	Protein transport protein Sec24B	SEC24B	16.8242	17.6407	18.3131	17.5927	18.3221	17.6347	17.9438	17.9669	0.491042	0.3742
O95490	O95490	Adhesion G protein-coupled receptor L2	ADGRL2	17.4952	18.5496	18.1114	18.0521	18.1993	17.8167	17.3423	17.7861	0.537811	-0.265967
O95563	O95563	Mitochondrial pyruvate carrier 2	MPC2	20.6978	17.7142	16.6857	18.3659	17.9256	16.7074	20.1702	18.2677	0.953331	-0.0981667
O95573;O60488	O95573	Fatty acid CoA ligase Acsl3	ACSL3	23.5706	22.2454	22.1746	22.6635	22.1063	22.2363	23.1667	22.5031	0.79121	-0.160433
O95602	O95602	DNA-directed RNA polymerase I subunit RPA1	POLR1A	18.1328	16.9854	18.3513	17.8232	17.5444	18.4202	19.3323	18.4323	0.415072	0.609133
O95619	O95619	YEATS domain-containing protein 4	YEATS4	19.7969	20.9974	21.2381	20.6775	20.9931	20.6619	20.1635	20.6062	0.896814	-0.0713
O95639	O95639	Cleavage and polyadenylation specificity factor subunit 4	CPSF4	21.8586	21.6748	21.5336	21.689	21.4763	21.1497	20.8238	21.1499	0.0849053	-0.539067
O95674	O95674	Phosphatidate cytidylyltransferase 2	CDS2	18.7984	17.2858	18.9623	18.3488	17.6954	16.3303	19.4327	17.8195	0.644585	-0.529367
O95684	O95684	Centrosomal protein 43	CEP43	19.8311	20.7084	20.5447	20.3614	20.1392	20.0464	19.5116	19.8991	0.243546	-0.462333
O95758	O95758	Polypyrimidine tract-binding protein 3	PTBP3	19.1634	20.6672	15.6473	18.4926	16.0685	16.2887	20.2899	17.549	0.665399	-0.9436
O95777	O95777	U6 snRNA-associated Sm-like protein LSm8	LSM8	24.4564	24.4985	24.4018	24.4522	24.3864	24.8821	24.1256	24.4647	0.960471	0.0124667
O95782	O95782	AP-2 complex subunit alpha-1	AP2A1	23.5818	24.061	23.7179	23.7869	23.9566	23.6142	23.6214	23.7307	0.773658	-0.0561667
O95793	O95793	Double-stranded RNA-binding protein Staufen homolog 1	STAU1	23.9443	23.9276	23.9338	23.9352	23.821	23.9722	23.6751	23.8228	0.319968	-0.112467
O95807	O95807	Transmembrane protein 50A	TMEM50A	19.1352	18.8899	15.7914	17.9388	17.2413	15.7826	17.129	16.7176	0.381292	-1.2212
O95810	O95810	Caveolae-associated protein 2	CAVIN2	22.0806	22.1493	22.4669	22.2323	22.8798	22.9473	22.3992	22.7421	0.0798529	0.509833
O95816	O95816	BAG family molecular chaperone regulator 2	BAG2	25.158	25.9165	25.689	25.5878	24.8146	27.1853	26.6145	26.2048	0.484066	0.616967
O95817	O95817	BAG family molecular chaperone regulator 3	BAG3	18.7161	17.5202	19.792	18.6761	19.8122	19.8925	18.9903	19.565	0.310331	0.8889
O95819;Q9UKE5;Q8N4C8	O95819;Q9UKE5;Q8N4C8	Mitogen-activated protein kinase kinase kinase kinase 4;TRAF2 and NCK-interacting protein kinase;Misshapen-like kinase 1	MAP4K4;TNIK;MINK1	18.9392	18.3522	18.9871	18.7595	17.57	18.264	18.5107	18.1149	0.144345	-0.6446
O95831	O95831	Apoptosis-inducing factor 1, mitochondrial	AIFM1	22.9266	23.1606	22.7329	22.94	23.416	23.5976	22.7455	23.253	0.358724	0.313
O95864	O95864	Acyl-CoA 6-desaturase	FADS2	19.5924	20.1194	17.5001	19.0706	20.2219	16.3909	19.7399	18.7842	0.854034	-0.2864
O95870	O95870	Phosphatidylserine lipase ABHD16A	ABHD16A	17.3832	17.7931	16.3891	17.1885	16.6923	16.0205	17.0331	16.582	0.308204	-0.6065
O95980	O95980	Reversion-inducing cysteine-rich protein with Kazal motifs	RECK	17.1113	16.1446	17.427	16.8943	16.6789	17.8375	16.2318	16.9161	0.973517	0.0217667
O95983	O95983	Methyl-CpG-binding domain protein 3	MBD3	21.3599	20.2729	18.1399	19.9242	21.3139	21.7686	21.6195	21.5673	0.222702	1.6431
O96000	O96000	NADH dehydrogenase [ubiquinone] 1 beta subcomplex subunit 10	NDUFB10	23.1041	22.8859	22.2401	22.7434	21.2562	23.3923	22.7491	22.4659	0.71534	-0.2775
O96005	O96005	Putative lipid scramblase CLPTM1	CLPTM1	16.7599	17.1075	17.0425	16.97	17.2248	17.7508	18.3751	17.7836	0.123518	0.8136
O96008	O96008	Mitochondrial import receptor subunit TOM40 homolog	TOMM40	24.6339	22.0549	20.9964	22.5617	20.5456	20.882	24.1083	21.8453	0.671378	-0.716433
O96019;O94805	O96019	Actin-like protein 6A	ACTL6A	24.0177	24.3954	24.4136	24.2756	24.3732	24.525	24.0607	24.3196	0.826196	0.0440667
O96028	O96028	Histone-lysine N-methyltransferase NSD2	NSD2	16.7844	15.4293	15.6544	15.956	16.2002	16.4832	16.9157	16.533	0.30736	0.577
P00167	P00167	Cytochrome b5	CYB5A	20.1415	20.2975	15.6962	18.7117	16.0419	22.0317	23.2556	20.4431	0.559562	1.73133
P00338	P00338	L-lactate dehydrogenase A chain	LDHA	21.2034	22.8244	21.7374	21.9217	22.6318	22.5182	21.1752	22.1084	0.793772	0.186667
P00367;P49448	P00367;P49448	Glutamate dehydrogenase 1, mitochondrial;Glutamate dehydrogenase 2, mitochondrial	GLUD1;GLUD2	25.1084	25.6502	25.4305	25.3964	25.3581	25.1088	24.993	25.1533	0.279684	-0.243067
P00387	P00387	NADH-cytochrome b5 reductase 3	CYB5R3	24.9361	23.8105	23.9273	24.2246	23.9743	23.2402	24.3353	23.8499	0.480037	-0.3747
P00390	P00390	Glutathione reductase, mitochondrial	GSR	20.856	22.4835	22.0387	21.7927	22.2075	21.391	21.5944	21.731	0.916885	-0.0617667
P00403	P00403	Cytochrome c oxidase subunit 2	MT-CO2	23.4436	16.4378	22.5763	20.8192	22.3404	22.0915	23.6198	22.6839	0.488875	1.86467
P00491	P00491	Purine nucleoside phosphorylase	PNP	19.718	20.4974	20.279	20.1648	20.1582	19.6153	18.8934	19.5556	0.244969	-0.609167
P00505	P00505	Aspartate aminotransferase, mitochondrial	GOT2	22.8232	23.5312	23.182	23.1788	23.2496	23.2218	22.4543	22.9752	0.573792	-0.203567
P00558;P07205	P00558	Phosphoglycerate kinase 1	PGK1	19.9845	19.9014	19.8082	19.898	19.8057	20.635	19.1844	19.875	0.961479	-0.023
P00846	P00846	ATP synthase subunit a	MT-ATP6	24.6552	22.0933	22.2696	23.006	22.4927	22.2102	24.0367	22.9132	0.931204	-0.0928333
P01040	P01040	Cystatin-A;Cystatin-A, N-terminally processed	CSTA	22.8857	23.6278	23.5606	23.358	23.425	22.3884	21.6288	22.4807	0.229093	-0.8773
P01111;P01116;P01112	P01111;P01116;P01112	GTPase NRas;GTPase KRas;GTPase KRas, N-terminally processed;GTPase HRas;GTPase HRas, N-terminally processed	NRAS;KRAS;HRAS	23.672	23.7969	23.533	23.6673	23.906	24.2651	23.782	23.9844	0.147276	0.317067
P01130	P01130	Low-density lipoprotein receptor	LDLR	17.0157	16.7283	17.9628	17.2356	18.86	17.4403	18.7496	18.35	0.134276	1.11437
P01889	P01889	HLA class I histocompatibility antigen, B alpha chain	HLA-B	19.674	19.9771	20.1655	19.9389	20.8893	20.0125	22.4264	21.1094	0.236015	1.17053
P02458	P02458	Collagen alpha-1(II) chain;Collagen alpha-1(II) chain;Chondrocalcin	COL2A1	17.1641	18.3173	17.5989	17.6934	18.5584	17.7352	17.0621	17.7852	0.875551	0.0918
P02462;P29400	P02462;P29400	Collagen alpha-1(IV) chain;Arresten;Collagen alpha-5(IV) chain	COL4A1;COL4A5	16.4148	18.0506	17.3737	17.2797	16.79	17.3855	17.2511	17.1422	0.806794	-0.1375
P02511	P02511	Alpha-crystallin B chain	CRYAB	20.5644	20.7242	20.9144	20.7343	20.3236	20.3604	20.4057	20.3632	0.0601357	-0.3711
P02545;REV__Q5VX52	P02545	Prelamin-A/C;Lamin-A/C	LMNA	28.1045	28.6382	28.7664	28.503	28.8795	28.6163	28.3064	28.6007	0.728598	0.0977
P02671	P02671	Fibrinogen alpha chain;Fibrinopeptide A;Fibrinogen alpha chain	FGA	17.1339	16.552	18.2966	17.3275	17.3275	16.5436	15.9744	16.6152	0.335728	-0.712333
P02751	P02751	Fibronectin;Anastellin;Ugl-Y1;Ugl-Y2;Ugl-Y3	FN1	20.7045	21.5631	21.0726	21.1134	20.6185	21.5582	21.1361	21.1043	0.981415	-0.00913333
P02786;Q9UP52	P02786	Transferrin receptor protein 1;Transferrin receptor protein 1, serum form	TFRC	26.1354	25.6639	25.8106	25.87	25.9181	25.3681	25.9364	25.7409	0.610909	-0.1291
P02794	P02794	Ferritin heavy chain;Ferritin heavy chain, N-terminally processed	FTH1	19.9956	19.6428	20.0979	19.9121	20.0369	19.6037	19.7404	19.7937	0.563128	-0.118433
P04040	P04040	Catalase	CAT	18.1675	19.7843	19.6439	19.1986	19.1994	18.9498	18.3886	18.8459	0.582473	-0.352633
P04062	P04062	Lysosomal acid glucosylceramidase	GBA1	22.8979	23.3165	23.708	23.3075	23.7841	23.4908	23.2581	23.511	0.512345	0.203533
P04075;P05062	P04075	Fructose-bisphosphate aldolase A	ALDOA	25.4523	25.9922	25.6709	25.7051	25.9531	25.8081	25.5194	25.7602	0.79925	0.0550667
P04083	P04083	Annexin A1;Annexin Ac2-26	ANXA1	25.1849	25.6695	25.1706	25.3417	26.0875	25.7935	25.5645	25.8152	0.101569	0.4735
P04156	P04156	Major prion protein	PRNP	24.0933	23.8427	24.0359	23.9906	23.0054	23.0078	24.0365	23.3499	0.198627	-0.640733
P04179	P04179	Superoxide dismutase [Mn], mitochondrial	SOD2	22.438	22.9313	22.4659	22.6117	22.7023	22.6505	21.9311	22.428	0.573582	-0.183767
P04181	P04181	Ornithine aminotransferase, mitochondrial;Ornithine aminotransferase, hepatic form;Ornithine aminotransferase, renal form	OAT	23.0175	23.5313	22.005	22.8513	22.4322	22.9022	22.4413	22.5919	0.630014	-0.259367
P04216	P04216	Thy-1 membrane glycoprotein	THY1	25.2942	24.9568	25.5682	25.2731	24.9368	24.9238	25.6203	25.1603	0.718558	-0.112767
P04350	P04350	Tubulin beta-4A chain	TUBB4A	21.5732	16.826	17.9289	18.776	22.6027	22.5301	22.1158	22.4162	0.124924	3.64017
P04406	P04406	Glyceraldehyde-3-phosphate dehydrogenase	GAPDH	28.3524	28.8722	28.6033	28.6093	28.6857	28.5126	28.2972	28.4985	0.588688	-0.1108
P04439	P04439	HLA class I histocompatibility antigen, A alpha chain	HLA-A	23.9698	23.8747	23.6329	23.8258	23.5093	23.4829	24.0255	23.6726	0.502739	-0.153233
P04632;Q96L46	P04632	Calpain small subunit 1	CAPNS1	20.6721	21.6204	22.5174	21.6033	22.7298	22.8739	22.5231	22.7089	0.16964	1.10563
P04792	P04792	Heat shock protein beta-1	HSPB1	26.5878	27.0054	26.1347	26.576	26.8147	26.739	26.2663	26.6067	0.925125	0.0307
P04818	P04818	Thymidylate synthase	TYMS	19.2638	20.7901	19.4262	19.8267	20.0411	20.2898	20.2918	20.2076	0.515197	0.380867
P04843	P04843	Dolichyl-diphosphooligosaccharide--protein glycosyltransferase subunit 1	RPN1	25.8116	23.6706	24.6626	24.7149	24.4015	23.5365	25.2683	24.4021	0.714982	-0.312833
P04844	P04844	Dolichyl-diphosphooligosaccharide--protein glycosyltransferase subunit 2	RPN2	24.8233	24.1183	24.472	24.4712	24.1556	22.1032	24.3032	23.5207	0.311249	-0.950533
P04899	P04899	Guanine nucleotide-binding protein G(i) subunit alpha-2	GNAI2	26.1318	26.0552	25.8908	26.0259	26.0715	25.8217	26.0416	25.9783	0.676737	-0.0476667
Q93077;Q7L7L0;P04908	Q93077;Q7L7L0;P04908	Histone H2A type 1-C;Histone H2A type 3;Histone H2A type 1-B/E	H2AC6;H2AC25;H2AC4	25.1963	24.1755	24.5532	24.6417	25.1056	24.8494	24.12	24.6917	0.910868	0.05
P05023;P13637;P50993;Q13733;P20648	P05023	Sodium/potassium-transporting ATPase subunit alpha-1	ATP1A1	26.1963	25.8514	25.9011	25.9829	25.8809	25.2877	26.1406	25.7697	0.499423	-0.2132
P05026	P05026	Sodium/potassium-transporting ATPase subunit beta-1	ATP1B1	24.5411	24.6793	24.7121	24.6442	24.5973	23.4786	24.6442	24.24	0.40009	-0.404133
P05067	P05067	Amyloid-beta precursor protein;N-APP;Soluble APP-alpha;Soluble APP-beta;C99;Amyloid-beta protein 42;Amyloid-beta protein 40;C83;P3(42);P3(40);C80;Gamma-secretase C-terminal fragment 59;Gamma-secretase C-terminal fragment 57;Gamma-secretase C-terminal fragment 50;C31	APP	21.3871	21.0839	20.2453	20.9054	21.1653	21.4183	21.3247	21.3028	0.364641	0.397333
P05089	P05089	Arginase-1	ARG1	19.1076	22.8172	21.472	21.1323	22.2884	17.2073	19.6965	19.7307	0.488575	-1.40153
P05091;P00352;P47895;O94788	P05091	Aldehyde dehydrogenase, mitochondrial	ALDH2	23.6226	23.8341	24.4167	23.9578	23.2913	23.4129	23.1393	23.2812	0.0921011	-0.676633
P05109	P05109	Protein S100-A8	S100A8	21.3153	22.6698	22.5301	22.1717	21.977	21.2331	20.8017	21.3373	0.207425	-0.834467
P05121	P05121	Plasminogen activator inhibitor 1	SERPINE1	21.7344	20.925	22.1403	21.5999	22.0897	22.1437	21.4083	21.8806	0.553288	0.280667
P05141;Q9H0C2	P05141	ADP/ATP translocase 2;ADP/ATP translocase 2, N-terminally processed	SLC25A5	27.5493	25.3086	26.2647	26.3742	25.592	25.3795	27.3256	26.099	0.773917	-0.275167
P05198	P05198	Eukaryotic translation initiation factor 2 subunit 1	EIF2S1	25.2444	25.9989	25.7843	25.6759	25.916	25.6614	25.4113	25.6629	0.964038	-0.0129667
P05386	P05386	Large ribosomal subunit protein P1	RPLP1	24.8974	24.701	25.1611	24.9198	25.053	26.0069	25.7564	25.6054	0.123122	0.6856
P05387	P05387	Large ribosomal subunit protein P2	RPLP2	23.109	23.2783	23.4178	23.2684	23.73	24.163	24.1559	24.0163	0.0168521	0.747933
P05388;Q8NHW5	P05388;Q8NHW5	Large ribosomal subunit protein uL10;Putative ribosomal protein uL10-like	RPLP0;RPLP0P6	28.9987	29.4006	29.3137	29.2377	29.4166	29.4505	28.8519	29.2397	0.993533	0.002
P05412	P05412	Transcription factor Jun	JUN	21.9409	21.9782	22.7517	22.2236	22.8419	22.6888	22.0375	22.5227	0.454639	0.299133
P05455	P05455	Lupus La protein	SSB	24.2657	25.1933	24.8172	24.7587	24.8487	24.742	24.4442	24.6783	0.804325	-0.0804333
P05556	P05556	Integrin beta-1	ITGB1	25.4133	25.4026	25.3859	25.4006	24.9813	24.8187	25.2274	25.0091	0.0804038	-0.391467
P17252;P05771	P17252;P05771	Protein kinase C alpha type;Protein kinase C beta type	PRKCA;PRKCB	18.375	17.0478	17.4022	17.6083	16.8831	18.6588	16.2719	17.2713	0.707104	-0.337067
P05783;CON__H-INV:HIT000015463	P05783	Keratin, type I cytoskeletal 18	KRT18	29.3725	29.7619	29.8248	29.6531	30.0009	29.7048	29.276	29.6606	0.97801	0.0075
P08590;P05976	P08590;P05976	Myosin light chain 3;Myosin light chain 1/3, skeletal muscle isoform	MYL3;MYL1	22.6048	22.6728	22.4077	22.5618	22.4747	23.0861	22.1938	22.5849	0.939681	0.0231
P06132	P06132	Uroporphyrinogen decarboxylase	UROD	18.1281	18.5034	18.3047	18.3121	18.2477	19.6887	17.8931	18.6098	0.644469	0.297767
P06454	P06454	Prothymosin alpha;Prothymosin alpha, N-terminally processed;Thymosin alpha-1	PTMA	16.4734	16.0817	16.6856	16.4136	16.4684	16.5823	16.9878	16.6795	0.325247	0.265933
P06493;Q00536;Q00534;Q00537;O94921;Q07002;Q00535;P11802;Q96Q40	P06493	Cyclin-dependent kinase 1	CDK1	22.3987	23.1551	23.3938	22.9825	23.5799	23.1313	23.3533	23.3548	0.344787	0.3723
P06576	P06576	ATP synthase subunit beta, mitochondrial	ATP5F1B	28.2056	28.6944	28.7625	28.5542	28.7174	28.5125	28.0969	28.4423	0.681336	-0.1119
P06702	P06702	Protein S100-A9	S100A9	20.6579	22.5415	23.6553	22.2849	21.5309	20.7853	20.5999	20.972	0.268983	-1.31287
P06730;A6NMX2	P06730	Eukaryotic translation initiation factor 4E	EIF4E	22.9288	24.8273	24.3493	24.0351	24.4216	24.5664	24.4801	24.4894	0.509391	0.454233
P06733;P13929;P09104	P06733	Alpha-enolase	ENO1	26.537	27.08	27.2235	26.9468	27.0441	26.519	25.8105	26.4579	0.317359	-0.488967
P06744	P06744	Glucose-6-phosphate isomerase	GPI	19.7215	19.5628	19.9272	19.7372	20.8759	20.5572	19.8777	20.4369	0.128611	0.699767
P06748	P06748	Nucleophosmin	NPM1	30.5501	30.9643	31.0925	30.869	31.3469	30.5942	30.3348	30.7586	0.769526	-0.110333
P06753	P06753	Tropomyosin alpha-3 chain	TPM3	26.0383	26.727	27.2533	26.6729	27.0075	27.0322	26.4614	26.8337	0.712931	0.160833
P06756	P06756	Integrin alpha-V;Integrin alpha-V heavy chain;Integrin alpha-V light chain	ITGAV	20.6006	18.9688	19.8932	19.8209	18.7295	18.7714	20.157	19.2193	0.417287	-0.601567
P07099	P07099	Epoxide hydrolase 1	EPHX1	19.9703	18.1108	19.7539	19.2783	18.0357	18.2237	19.7784	18.6793	0.498759	-0.599067
P07195	P07195	L-lactate dehydrogenase B chain	LDHB	22.6823	23.926	23.8724	23.4936	23.72	22.8527	23.3546	23.3091	0.722579	-0.184467
P07196	P07196	Neurofilament light polypeptide	NEFL	21.4269	21.6217	21.5659	21.5382	21.9372	21.6625	21.1853	21.595	0.823248	0.0568333
P07199	P07199	Major centromere autoantigen B	CENPB	17.6153	18.0163	20.2336	18.6217	15.7217	19.8699	19.8233	18.4716	0.930662	-0.1501
P07203	P07203	Glutathione peroxidase 1	GPX1	22.123	22.1561	22.6535	22.3109	22.3738	22.9896	22.1067	22.49	0.601871	0.179167
P07237	P07237	Protein disulfide-isomerase	P4HB	24.7455	24.9575	25.1365	24.9465	25.2648	25.082	24.7164	25.0211	0.726231	0.0745667
P07305	P07305	Histone H1.0;Histone H1.0, N-terminally processed	H1-0	26.962	26.7053	26.6049	26.7574	26.6631	27.0701	27.3333	27.0222	0.316518	0.264767
P07339	P07339	Cathepsin D;Cathepsin D light chain;Cathepsin D heavy chain	CTSD	23.4964	23.9148	24.2701	23.8938	24.1631	24.3656	23.4186	23.9824	0.820487	0.0886667
P07355;A6NMY6	P07355;A6NMY6	Annexin A2;Putative annexin A2-like protein	ANXA2;ANXA2P2	31.6178	32.1133	31.7107	31.8139	32.1082	31.7943	31.4066	31.7697	0.870621	-0.0442333
P07384	P07384	Calpain-1 catalytic subunit	CAPN1	20.9769	21.4371	21.4434	21.2858	20.6347	20.8768	20.5601	20.6905	0.0398994	-0.595267
P07437;A6NNZ2;Q9H4B7;CON__ENSEMBL:ENSBTAP00000025008	P07437	Tubulin beta chain	TUBB	26.222	27.0223	26.7624	26.6689	26.9274	26.6493	26.3323	26.6363	0.91697	-0.0325667
P07602	P07602	Prosaposin;Saposin-A;Saposin-B-Val;Saposin-B;Saposin-C;Saposin-D	PSAP	22.3309	22.3382	22.0673	22.2455	21.9326	21.8046	22.2168	21.9847	0.165573	-0.2608
P07814	P07814	Bifunctional glutamate/proline--tRNA ligase;Glutamate--tRNA ligase;Proline--tRNA ligase	EPRS1	24.1081	24.2199	23.8456	24.0579	23.945	23.6101	23.8833	23.8128	0.181026	-0.245067
P07858	P07858	Cathepsin B;Cathepsin B light chain;Cathepsin B heavy chain	CTSB	24.1055	24.5777	24.3754	24.3529	24.5372	23.8819	23.6174	24.0122	0.347753	-0.3407
P07900;Q14568;Q58FG0;Q58FG1	P07900	Heat shock protein HSP 90-alpha	HSP90AA1	24.9432	25.4881	25.4339	25.2884	25.5805	25.3132	25.0267	25.3068	0.941574	0.0184
P07910;Q86SE5	P07910	Heterogeneous nuclear ribonucleoproteins C1/C2	HNRNPC	28.449	28.6344	28.5674	28.5503	28.9306	28.846	28.3416	28.7061	0.490607	0.1558
P07919;A0A096LP55	P07919	Cytochrome b-c1 complex subunit 6, mitochondrial	UQCRH	24.7379	24.4901	23.3326	24.1869	23.5959	25.4144	24.6216	24.544	0.62902	0.3571
P07942	P07942	Laminin subunit beta-1	LAMB1	16.7876	18.102	18.9943	17.9613	19.8534	18.6255	19.068	19.1823	0.19093	1.221
P07947;P12931;P06241	P07947	Tyrosine-protein kinase Yes	YES1	22.1905	22.0743	22.4064	22.2237	21.541	21.9175	22.0357	21.8314	0.103331	-0.392333
P07948;P08631	P07948	Tyrosine-protein kinase Lyn	LYN	19.5457	15.3531	18.655	17.8513	17.4446	18.8688	19.8755	18.7296	0.587696	0.878367
P07951	P07951	Tropomyosin beta chain	TPM2	19.4306	20.419	20.9736	20.2744	21.3482	21.0043	20.9154	21.0893	0.206658	0.8149
P07954	P07954	Fumarate hydratase, mitochondrial	FH	21.6882	22.3389	22.3044	22.1105	22.1861	21.782	21.8363	21.9348	0.523332	-0.1757
P08133	P08133	Annexin A6	ANXA6	24.8523	25.4089	25.1836	25.1483	25.2785	24.3969	24.6925	24.7893	0.316448	-0.358967
P08134	P08134	Rho-related GTP-binding protein RhoC	RHOC	16.9042	21.8527	18.5202	19.0924	17.5397	15.621	15.2502	16.137	0.168912	-2.9554
P08174	P08174	Complement decay-accelerating factor	CD55	18.4107	17.4018	19.3198	18.3774	17.9068	16.2507	18.9446	17.7007	0.523928	-0.676733
P08195	P08195	Amino acid transporter heavy chain SLC3A2	SLC3A2	26.8542	26.8559	26.85	26.8534	26.863	26.3273	26.8415	26.6773	0.420444	-0.1761
P08237	P08237	ATP-dependent 6-phosphofructokinase, muscle type	PFKM	21.5507	21.6835	21.608	21.6141	21.0838	21.143	20.5625	20.9298	0.0600685	-0.6843
P08238;Q58FF7	P08238	Heat shock protein HSP 90-beta	HSP90AB1	27.8647	28.4172	28.1091	28.1303	28.3119	27.8506	27.6166	27.9264	0.477982	-0.203967
P08240	P08240	Signal recognition particle receptor subunit alpha	SRPRA	22.4567	20.1063	21.1198	21.2276	20.1101	18.169	21.4897	19.9229	0.337039	-1.30467
P08243	P08243	Asparagine synthetase [glutamine-hydrolyzing]	ASNS	20.7608	20.3183	20.0135	20.3642	19.922	19.848	18.492	19.4207	0.168573	-0.943533
P08559;P29803	P08559	Pyruvate dehydrogenase E1 component subunit alpha, somatic form, mitochondrial	PDHA1	24.9718	25.3263	25.1761	25.1581	25.0626	25.0981	24.5543	24.905	0.296364	-0.253067
P08572	P08572	Collagen alpha-2(IV) chain;Canstatin	COL4A2	18.6802	19.4636	17.0795	18.4078	18.4098	19.7523	18.9254	19.0292	0.493299	0.6214
P08574	P08574	Cytochrome c1, heme protein, mitochondrial	CYC1	23.6734	20.705	21.5767	21.985	20.9206	20.1723	22.9298	21.3409	0.621616	-0.644133
P08579	P08579	U2 small nuclear ribonucleoprotein B	SNRPB2	20.7625	22.6113	20.5858	21.3199	22.8975	22.7388	20.7241	22.1201	0.448731	0.800267
P08582	P08582	Melanotransferrin	MELTF	21.3255	20.25	20.3163	20.6306	20.6981	19.3271	20.5835	20.2029	0.489878	-0.4277
P08621	P08621	U1 small nuclear ribonucleoprotein 70 kDa	SNRNP70	25.4492	25.9835	25.8714	25.768	25.7709	25.9649	25.5557	25.7638	0.984425	-0.0042
P08648	P08648	Integrin alpha-5;Integrin alpha-5 heavy chain;Integrin alpha-5 light chain	ITGA5	20.7433	21.3094	21.2979	21.1169	21.9091	21.1576	21.6177	21.5615	0.198826	0.4446
P08651;Q12857	P08651	Nuclear factor 1 C-type	NFIC	17.063	15.5236	17.6505	16.7457	17.1459	19.1248	19.5337	18.6015	0.130598	1.85577
P08670;P17661;P41219;P14136;P07197;Q16352	P08670	Vimentin	VIM	31.8333	32.2831	32.1859	32.1008	32.486	32.0993	31.67	32.0851	0.957536	-0.0156667
P08708	P08708	Small ribosomal subunit protein eS17	RPS17	27.7313	28.2931	27.8551	27.9598	27.7652	27.8784	27.5467	27.7301	0.321991	-0.229733
P08754;P19087;A8MTJ3;P11488	P08754	Guanine nucleotide-binding protein G(i) subunit alpha-3	GNAI3	23.7898	22.5992	24.7937	23.7276	23.7007	23.3407	23.7675	23.603	0.863992	-0.1246
P08758	P08758	Annexin A5	ANXA5	26.7034	27.0356	27.0984	26.9458	26.8224	26.4857	26.3034	26.5372	0.107629	-0.408633
P08865;A0A8I5KQE6	P08865;A0A8I5KQE6	Small ribosomal subunit protein uS2;Small ribosomal subunit protein uS2B	RPSA;RPSA2	29.3589	29.9827	29.7179	29.6865	30.0481	29.6882	29.4102	29.7155	0.91605	0.029
P08962	P08962	CD63 antigen	CD63	24.8888	22.8825	24.7623	24.1779	21.8533	22.4106	24.7034	22.9891	0.340219	-1.18877
P09001	P09001	Large ribosomal subunit protein uL3m	MRPL3	20.9001	20.888	21.1059	20.9647	19.5042	20.6909	21.192	20.4624	0.421573	-0.5023
P09012	P09012	U1 small nuclear ribonucleoprotein A	SNRPA	26.1089	26.5677	26.5472	26.4079	26.7356	26.7323	26.1242	26.5307	0.654237	0.122767
P09132	P09132	Signal recognition particle 19 kDa protein	SRP19	23.5151	24.1679	23.2099	23.631	23.3758	23.5346	23.5103	23.4736	0.635453	-0.1574
P09211	P09211	Glutathione S-transferase P	GSTP1	21.6948	23.3704	22.9329	22.666	22.5824	22.7257	22.3475	22.5519	0.843143	-0.114167
P09234	P09234	U1 small nuclear ribonucleoprotein C	SNRPC	25.9124	26.6425	26.3877	26.3142	26.4635	26.4517	25.7441	26.2198	0.782699	-0.0944333
P09382	P09382	Galectin-1	LGALS1	27.0076	27.506	27.1036	27.2057	27.0921	27.2833	27.0632	27.1462	0.747552	-0.0595333
P09429;B2RPK0	P09429;B2RPK0	High mobility group protein B1;Putative high mobility group protein B1-like 1	HMGB1;HMGB1P1	26.6026	26.7234	26.1352	26.4871	26.2459	26.2445	26.6285	26.373	0.634446	-0.1141
P09471	P09471	Guanine nucleotide-binding protein G(o) subunit alpha	GNAO1	19.8123	19.9575	20.3029	20.0242	20.0959	19.5394	19.4847	19.7067	0.267437	-0.317567
P09493	P09493	Tropomyosin alpha-1 chain	TPM1	24.0761	24.3863	24.3778	24.2801	24.5555	24.1322	23.7106	24.1328	0.620541	-0.1473
P09496	P09496	Clathrin light chain A	CLTA	26.3015	26.4526	26.3678	26.374	27.0295	26.9613	26.0662	26.6857	0.421332	0.3117
P09497	P09497	Clathrin light chain B	CLTB	23.2331	22.9696	24.2859	23.4962	24.2669	23.9129	23.0703	23.75	0.661045	0.253833
P09525	P09525	Annexin A4	ANXA4	24.3548	24.7542	24.4375	24.5155	24.1359	23.7721	24.1099	24.006	0.0393952	-0.509533
P09543	P09543	2,3-cyclic-nucleotide 3-phosphodiesterase	CNP	20.2855	20.1162	18.2907	19.5641	16.9917	18.6888	18.0732	17.9179	0.115746	-1.64623
P09601	P09601	Heme oxygenase 1;Heme oxygenase 1 soluble form	HMOX1	22.1694	20.2291	21.2463	21.2149	20.7985	20.5418	22.0968	21.1457	0.929929	-0.0692333
P09622	P09622	Dihydrolipoyl dehydrogenase, mitochondrial	DLD	24.6556	25.6854	25.5817	25.3076	25.548	25.6158	25.0427	25.4022	0.816069	0.0946
P09651;A0A2R8Y4L2;Q32P51	P09651;A0A2R8Y4L2;Q32P51	Heterogeneous nuclear ribonucleoprotein A1;Heterogeneous nuclear ribonucleoprotein A1, N-terminally processed;Heterogeneous nuclear ribonucleoprotein A1-like 3;Heterogeneous nuclear ribonucleoprotein A1-like 2	HNRNPA1;HNRNPA1L3;HNRNPA1L2	28.3103	28.905	28.7573	28.6575	28.7184	29.107	28.4162	28.7472	0.755131	0.0896667
P09661	P09661	U2 small nuclear ribonucleoprotein A	SNRPA1	26.0042	26.4988	26.4909	26.3313	25.855	26.5292	25.9185	26.1009	0.444882	-0.2304
P09669	P09669	Cytochrome c oxidase subunit 6C	COX6C	22.3031	23.3267	23.0539	22.8946	23.1366	21.3792	21.0793	21.865	0.24745	-1.02953
P09874	P09874	Poly [ADP-ribose] polymerase 1;Poly [ADP-ribose] polymerase 1, processed C-terminus;Poly [ADP-ribose] polymerase 1, processed N-terminus	PARP1	24.5871	23.4387	23.5637	23.8632	24.235	23.8646	24.5716	24.2237	0.448259	0.360567
P09884	P09884	DNA polymerase alpha catalytic subunit	POLA1	17.6463	15.9512	17.6698	17.0891	18.4834	16.5198	16.3807	17.128	0.967167	0.0388667
P09972	P09972	Fructose-bisphosphate aldolase C	ALDOC	16.4242	21.1834	20.7366	19.4481	20.591	20.8154	20.1272	20.5112	0.557059	1.06313
Q71UI9;P0C0S5	Q71UI9;P0C0S5	Histone H2A.V;Histone H2A.Z	H2AZ2;H2AZ1	26.7566	26.9075	26.2279	26.6307	27.027	27.3059	26.9572	27.0967	0.138154	0.466033
Q6FI13;P0C0S8;Q99878;Q9BTM1;Q16777;Q96KK5;P20671	Q6FI13;P0C0S8;Q99878;Q9BTM1;Q16777;Q96KK5;P20671	Histone H2A type 2-A;Histone H2A type 1;Histone H2A type 1-J;Histone H2A.J;Histone H2A type 2-C;Histone H2A type 1-H;Histone H2A type 1-D	H2AC18;H2AC11;H2AC14;H2AJ;H2AC20;H2AC12;H2AC7	31.9096	32.0065	31.9122	31.9428	31.4338	32.197	31.9004	31.8437	0.700601	-0.0990333
P0C7V8	P0C7V8	DDB1- and CUL4-associated factor 8-like protein 2	DCAF8L2	17.116	16.3001	17.5994	17.0052	17.1141	15.5526	17.266	16.6442	0.619993	-0.360933
P0DMV8;P0DMV9	P0DMV8;P0DMV9	Heat shock 70 kDa protein 1A;Heat shock 70 kDa protein 1B	HSPA1A;HSPA1B	26.311	26.7899	26.7964	26.6324	27.0537	26.8125	26.2698	26.712	0.793502	0.0795667
P0DP25;P0DP24;P0DP23	P0DP25;P0DP24;P0DP23	Calmodulin-3;Calmodulin-2;Calmodulin-1	CALM3;CALM2;CALM1	22.5113	21.3301	20.9581	21.5998	21.4501	23.216	22.9729	22.5463	0.263089	0.9465
P0DP91;Q03468;Q8N328	P0DP91;Q03468;Q8N328	Chimeric ERCC6-PGBD3 protein;DNA excision repair protein ERCC-6;PiggyBac transposable element-derived protein 3	ERCC6;PGBD3	19.7505	21.5017	21.3522	20.8681	21.1279	19.5186	19.0292	19.8919	0.313761	-0.976233
P10301	P10301	Ras-related protein R-Ras	RRAS	22.471	22.4438	22.4402	22.4517	21.5368	21.1596	22.4088	21.7017	0.179759	-0.749933
P10321	P10321	HLA class I histocompatibility antigen, C alpha chain	HLA-C	22.3189	22.8522	23.4464	22.8725	23.3678	22.8215	23.6671	23.2855	0.373589	0.412967
P10412;P16402;P22492;P16401	P10412;P16402	Histone H1.4;Histone H1.3	H1-4;H1-3	16.9061	15.9867	22.5115	18.4681	22.2136	22.6458	22.1707	22.3434	0.197138	3.87527
P10515	P10515	Dihydrolipoyllysine-residue acetyltransferase component of pyruvate dehydrogenase complex, mitochondrial	DLAT	23.9551	23.7289	24.1421	23.942	24.4269	23.7543	23.9861	24.0558	0.652925	0.113733
P10586	P10586	Receptor-type tyrosine-protein phosphatase F	PTPRF	16.5462	18.191	18.2695	17.6689	16.9941	19.1458	18.1393	18.0931	0.639558	0.424167
P10606	P10606	Cytochrome c oxidase subunit 5B, mitochondrial	COX5B	20.3831	21.4185	20.9177	20.9064	21.0156	21.6194	20.7819	21.139	0.583521	0.232533
P10619	P10619	Lysosomal protective protein;Lysosomal protective protein 32 kDa chain;Lysosomal protective protein 20 kDa chain	CTSA	20.6554	20.6243	21.1106	20.7968	20.2428	20.2824	20.6125	20.3792	0.105849	-0.417533
P10620	P10620	Microsomal glutathione S-transferase 1	MGST1	22.2373	16.2972	17.5788	18.7044	17.8597	17.8171	20.5979	18.7582	0.980493	0.0538
P10809	P10809	60 kDa heat shock protein, mitochondrial	HSPD1	28.7981	29.3099	29.3608	29.1563	29.4465	29.2799	28.8413	29.1892	0.903257	0.0329667
P10909	P10909	Clusterin;Clusterin beta chain;Clusterin alpha chain	CLU	22.4211	23.0027	22.954	22.7926	22.9059	22.7927	22.241	22.6465	0.626451	-0.146067
P11021	P11021	Endoplasmic reticulum chaperone BiP	HSPA5	28.3166	28.8907	28.8203	28.6759	29.2076	29.0122	28.4592	28.893	0.494511	0.217133
P11047	P11047	Laminin subunit gamma-1	LAMC1	18.5349	17.9719	17.9404	18.1491	19.4247	18.9757	18.5076	18.9693	0.0723681	0.820267
P11142;P54652	P11142	Heat shock cognate 71 kDa protein	HSPA8	28.6775	29.2746	29.3463	29.0995	29.5844	29.2576	28.7035	29.1818	0.81736	0.0823667
P11166	P11166	Solute carrier family 2, facilitated glucose transporter member 1	SLC2A1	24.8337	24.4389	24.9339	24.7355	24.5185	24.0715	24.4627	24.3509	0.136251	-0.3846
P11169;Q8TDB8	P11169;Q8TDB8	Solute carrier family 2, facilitated glucose transporter member 3;Solute carrier family 2, facilitated glucose transporter member 14	SLC2A3;SLC2A14	21.4655	22.8323	21.8565	22.0514	21.4082	20.8469	21.3423	21.1991	0.159181	-0.8523
P11177	P11177	Pyruvate dehydrogenase E1 component subunit beta, mitochondrial	PDHB	25.8439	26.1536	25.8532	25.9502	26.2681	26.4038	25.7461	26.1393	0.462669	0.1891
P11182	P11182	Lipoamide acyltransferase component of branched-chain alpha-keto acid dehydrogenase complex, mitochondrial	DBT	18.334	19.1858	19.7058	19.0752	19.3346	19.2377	18.3296	18.9673	0.84391	-0.1079
P11233	P11233	Ras-related protein Ral-A	RALA	23.8136	23.038	21.3076	22.7197	22.8684	22.6962	23.314	22.9595	0.7802	0.2398
P11234	P11234	Ras-related protein Ral-B	RALB	21.0355	20.7537	20.9328	20.9073	21.0599	21.0883	21.0235	21.0572	0.205938	0.1499
P11310	P11310	Medium-chain specific acyl-CoA dehydrogenase, mitochondrial	ACADM	20.8714	21.1653	20.3919	20.8095	21.7721	21.3932	21.0923	21.4192	0.11247	0.609667
P11387;Q969P6	P11387	DNA topoisomerase 1	TOP1	22.2617	19.3429	19.9965	20.5337	21.9872	21.9225	23.0658	22.3252	0.169347	1.79147
P11388	P11388	DNA topoisomerase 2-alpha	TOP2A	22.8914	20.2298	20.9386	21.3533	22.2832	21.1408	23.4554	22.2931	0.418322	0.939867
P11413	P11413	Glucose-6-phosphate 1-dehydrogenase	G6PD	24.4764	24.8336	24.7271	24.679	24.7372	24.4281	24.4567	24.5407	0.393325	-0.138367
P11498	P11498	Pyruvate carboxylase, mitochondrial	PC	18.4867	20.0648	18.4298	18.9938	18.5335	19.7102	19.9085	19.3841	0.601402	0.3903
P11586	P11586	C-1-tetrahydrofolate synthase, cytoplasmic;Methylenetetrahydrofolate dehydrogenase;Methenyltetrahydrofolate cyclohydrolase;Formyltetrahydrofolate synthetase;C-1-tetrahydrofolate synthase, cytoplasmic, N-terminally processed	MTHFD1	26.108	26.6771	26.5715	26.4522	26.4556	26.312	25.9693	26.2456	0.415313	-0.206567
P11717	P11717	Cation-independent mannose-6-phosphate receptor	IGF2R	21.6906	23.3361	22.9832	22.67	22.65	21.326	20.503	21.493	0.218889	-1.17697
P11908	P11908	Ribose-phosphate pyrophosphokinase 2	PRPS2	21.0947	20.2273	19.2669	20.1963	19.6463	19.6224	19.1863	19.485	0.308777	-0.7113
P11940;Q9H361;Q4VXU2;Q96DU9	P11940;Q9H361	Polyadenylate-binding protein 1;Polyadenylate-binding protein 3	PABPC1;PABPC3	27.2939	27.6965	27.626	27.5388	27.7979	27.4924	26.9789	27.4231	0.696286	-0.115733
P12004	P12004	Proliferating cell nuclear antigen	PCNA	28.2389	28.9191	28.7123	28.6234	28.6737	27.9377	28.0154	28.2089	0.251376	-0.4145
P12235	P12235	ADP/ATP translocase 1	SLC25A4	21.408	18.8568	20.4709	20.2452	18.9903	18.9424	20.5043	19.479	0.450266	-0.766233
P12236	P12236	ADP/ATP translocase 3;ADP/ATP translocase 3, N-terminally processed	SLC25A6	23.4075	20.6293	22.0056	22.0141	20.3405	19.9195	22.5418	20.9339	0.397798	-1.0802
P12268	P12268	Inosine-5-monophosphate dehydrogenase 2	IMPDH2	27.8392	28.3864	28.2331	28.1529	28.1606	28.1061	27.486	27.9176	0.437445	-0.235333
P12270	P12270	Nucleoprotein TPR	TPR	20.6984	22.2065	22.0395	21.6481	22.206	22.0796	21.2927	21.8594	0.727406	0.2113
P12273	P12273	Prolactin-inducible protein	PIP	22.3386	23.8193	23.9201	23.3593	23.4996	22.4517	21.6449	22.5321	0.327117	-0.827267
P12532;P17540	P12532	Creatine kinase U-type, mitochondrial	CKMT1A	23.4079	24.0805	23.8834	23.7906	24.1662	23.362	22.7629	23.4304	0.486119	-0.360233
P12814	P12814	Alpha-actinin-1	ACTN1	27.2159	27.8098	27.6376	27.5544	27.8591	27.8328	27.2655	27.6525	0.727368	0.0980333
P12955	P12955	Xaa-Pro dipeptidase	PEPD	18.9465	19.6381	19.4134	19.3327	19.1806	21.3403	21.2867	20.6025	0.210341	1.26987
P12956	P12956	X-ray repair cross-complementing protein 6	XRCC6	26.0891	25.4957	25.633	25.7393	26.2536	25.4976	26.178	25.9764	0.476735	0.237133
P13010	P13010	X-ray repair cross-complementing protein 5	XRCC5	26.4987	26.8573	26.8643	26.7401	26.7031	26.4976	26.5253	26.5753	0.313472	-0.164767
P13073	P13073	Cytochrome c oxidase subunit 4 isoform 1, mitochondrial	COX4I1	22.7304	21.4897	21.5825	21.9342	21.5242	20.3908	23.1006	21.6719	0.785565	-0.262333
P13473	P13473	Lysosome-associated membrane glycoprotein 2	LAMP2	22.3499	22.0979	21.9907	22.1462	21.8631	21.8003	21.6059	21.7564	0.0465184	-0.389733
P13489	P13489	Ribonuclease inhibitor	RNH1	19.5966	20.0454	21.2531	20.2984	20.7831	19.8159	19.1439	19.9143	0.605632	-0.384067
P13533	P13533	Myosin-6	MYH6	17.7322	16.1125	16.7989	16.8812	16.7734	17.667	17.017	17.1525	0.648177	0.271267
P13591	P13591	Neural cell adhesion molecule 1	NCAM1	20.0479	20.1511	19.293	19.8307	19.0337	19.5716	19.9341	19.5131	0.446281	-0.317533
P13639	P13639	Elongation factor 2	EEF2	26.1058	26.5074	26.4031	26.3388	26.4557	26.4828	25.9728	26.3038	0.873318	-0.035
P13804	P13804	Electron transfer flavoprotein subunit alpha, mitochondrial	ETFA	20.764	20.9143	21.7266	21.135	21.3335	19.3705	19.9597	20.2212	0.257064	-0.913733
P13861;P31323	P13861	cAMP-dependent protein kinase type II-alpha regulatory subunit	PRKAR2A	23.0147	23.5932	23.8313	23.4797	23.0639	23.5681	22.9951	23.209	0.425068	-0.2707
P13984	P13984	General transcription factor IIF subunit 2	GTF2F2	18.3587	19.0189	19.7453	19.041	21.2552	19.5505	18.5698	19.7918	0.457071	0.750867
P13987	P13987	CD59 glycoprotein	CD59	26.7424	25.459	26.4135	26.205	25.2898	26.0308	26.9033	26.0746	0.840233	-0.130333
P13995	P13995	Bifunctional methylenetetrahydrofolate dehydrogenase/cyclohydrolase, mitochondrial;NAD-dependent methylenetetrahydrofolate dehydrogenase;Methenyltetrahydrofolate cyclohydrolase	MTHFD2	24.9066	25.3781	25.2121	25.1656	25.5918	25.3588	24.7029	25.2178	0.872766	0.0522333
P14618;P30613	P14618	Pyruvate kinase PKM	PKM	25.1555	25.525	25.3992	25.3599	25.8148	25.5265	25.5715	25.6376	0.122096	0.2777
P14625;Q58FF3	P14625	Endoplasmin	HSP90B1	25.9536	26.445	26.3912	26.2633	26.6333	26.173	26.0018	26.2694	0.98133	0.0061
P14635	P14635	G2/mitotic-specific cyclin-B1	CCNB1	20.332	16.6383	20.0682	19.0128	19.7966	16.9552	17.8633	18.205	0.611531	-0.8078
P14649	P14649	Myosin light chain 6B	MYL6B	17.064	15.7059	17.0959	16.6219	16.1839	16.2708	18.6768	17.0438	0.68162	0.4219
P14678;P63162	P14678;P63162	Small nuclear ribonucleoprotein-associated proteins B and B;Small nuclear ribonucleoprotein-associated protein N	SNRPB;SNRPN	26.7033	27.3289	26.9206	26.9843	27.1644	27.2642	26.564	26.9975	0.965215	0.0132667
P14866	P14866	Heterogeneous nuclear ribonucleoprotein L	HNRNPL	28.1893	28.7056	28.4882	28.461	28.6558	28.6818	28.0267	28.4548	0.982142	-0.00626667
P14868	P14868	Aspartate--tRNA ligase, cytoplasmic	DARS1	24.2429	24.8603	24.2587	24.454	24.2257	24.2053	24.4832	24.3047	0.553669	-0.149233
P14923	P14923	Junction plakoglobin	JUP	17.0953	18.4973	18.5952	18.0626	17.8409	16.9388	17.1791	17.3196	0.269207	-0.743
P14927	P14927	Cytochrome b-c1 complex subunit 7	UQCRB	21.5122	21.4835	21.3597	21.4518	21.3761	21.4282	21.6525	21.4856	0.749355	0.0338
P15151	P15151	Poliovirus receptor	PVR	23.7565	23.2709	23.6458	23.5577	23.9597	23.6211	23.6179	23.7329	0.401915	0.175167
P15311	P15311	Ezrin	EZR	23.6985	24.1589	24.0403	23.9659	24.45	24.0887	23.8008	24.1132	0.564654	0.147267
P15408	P15408	Fos-related antigen 2	FOSL2	20.3538	19.9656	20.772	20.3638	21.2253	21.3937	20.7454	21.1215	0.0688533	0.757667
P15529	P15529	Membrane cofactor protein	CD46	20.7909	20.5301	20.1635	20.4948	19.25	19.7235	20.3625	19.7787	0.143875	-0.716167
P15531	P15531	Nucleoside diphosphate kinase A	NME1	19.7606	16.4773	19.8547	18.6975	19.1928	19.7085	19.3839	19.4284	0.579128	0.730867
P15880	P15880	Small ribosomal subunit protein uS5	RPS2	27.6308	28.0232	27.7456	27.7999	27.6488	27.5798	27.3166	27.5151	0.140083	-0.2848
P15924	P15924	Desmoplakin	DSP	17.824	19.0481	17.7212	18.1978	17.6585	15.9972	15.8026	16.4861	0.0844857	-1.71167
P15927	P15927	Replication protein A 32 kDa subunit	RPA2	22.3482	22.7071	23.0228	22.6927	22.5957	22.7729	22.8001	22.7229	0.894306	0.0302
P16070	P16070	CD44 antigen	CD44	25.2055	25.5613	25.1898	25.3189	25.3174	24.8011	25.3137	25.1441	0.456925	-0.1748
P16104;Q96QV6	P16104;Q96QV6	Histone H2AX;Histone H2A type 1-A	H2AX;H2AC1	24.5845	24.6268	24.3852	24.5322	25.1831	25.9238	24.8893	25.3321	0.114459	0.7999
P16220;P18846	P16220;P18846	Cyclic AMP-responsive element-binding protein 1;Cyclic AMP-dependent transcription factor ATF-1	CREB1;ATF1	24.4801	24.9852	24.6643	24.7099	25.0819	23.8307	24.3153	24.4093	0.506908	-0.300567
P16278	P16278	Beta-galactosidase	GLB1	19.0987	20.039	19.3846	19.5074	19.4218	16.4333	16.9905	17.6152	0.167113	-1.89223
P16403	P16403	Histone H1.2	H1-2	28.1376	28.0326	28.2502	28.1401	28.2944	28.2508	28.5362	28.3605	0.120451	0.220333
P16435	P16435	NADPH--cytochrome P450 reductase	POR	22.2891	20.5948	19.915	20.933	21.4874	19.3797	22.4256	21.0976	0.892956	0.1646
P16520	P16520	Guanine nucleotide-binding protein G(I)/G(S)/G(T) subunit beta-3	GNB3	17.0107	20.4997	17.6853	18.3986	20.4209	21.0647	22.753	21.4129	0.0879526	3.0143
P16615;O14983;Q93084	P16615	Sarcoplasmic/endoplasmic reticulum calcium ATPase 2	ATP2A2	23.5703	22.2984	22.6568	22.8418	22.0588	21.463	23.4192	22.3137	0.494036	-0.528167
P16989;Q9Y2T7	P16989	Y-box-binding protein 3	YBX3	22.6681	23.0281	22.7014	22.7992	23.3236	22.6102	21.8231	22.5856	0.675602	-0.213567
P17026	P17026	Zinc finger protein 22	ZNF22	19.6	17.5169	20.4985	19.2051	17.592	20.2877	17.8245	18.5681	0.633005	-0.637067
P17066;P48741	P17066;P48741	Heat shock 70 kDa protein 6;Putative heat shock 70 kDa protein 7	HSPA6;HSPA7	25.0259	25.3728	25.2766	25.2251	25.7829	25.6192	25.1405	25.5142	0.276281	0.2891
P17301	P17301	Integrin alpha-2	ITGA2	22.7827	22.8538	22.8758	22.8374	22.7122	22.1723	22.8568	22.5804	0.342217	-0.257
P17480	P17480	Nucleolar transcription factor 1	UBTF	22.849	23.272	23.2167	23.1126	23.4984	23.3769	22.6261	23.1671	0.869096	0.0545667
P17535	P17535	Transcription factor JunD	JUND	19.842	19.9969	20.8299	20.2229	20.2475	20.4472	19.3479	20.0142	0.671453	-0.208733
P17612	P17612	cAMP-dependent protein kinase catalytic subunit alpha	PRKACA	20.2938	20.2254	20.3944	20.3045	20.5902	20.0381	19.8218	20.15	0.571881	-0.1545
P17655	P17655	Calpain-2 catalytic subunit	CAPN2	18.1944	20.558	20.0092	19.5872	20.4197	19.7815	19.8175	20.0062	0.622567	0.419033
P17676	P17676	CCAAT/enhancer-binding protein beta	CEBPB	20.116	18.1246	19.4828	19.2411	20.5418	19.7335	21.0046	20.4266	0.176255	1.1855
P17706	P17706	Tyrosine-protein phosphatase non-receptor type 2	PTPN2	17.2927	24.9143	24.9688	22.3919	25.2676	23.3392	17.7345	22.1138	0.938898	-0.278167
P17812;Q9NRF8	P17812	CTP synthase 1	CTPS1	20.3488	22.2895	22.2793	21.6392	21.6092	22.4085	21.1644	21.7274	0.912437	0.0881667
P17844	P17844	Probable ATP-dependent RNA helicase DDX5	DDX5	27.0727	27.3211	27.4788	27.2909	27.5009	27.465	27.235	27.4003	0.495746	0.109433
P17858	P17858	ATP-dependent 6-phosphofructokinase, liver type	PFKL	19.6758	20.1758	19.886	19.9125	19.9048	19.9787	19.6567	19.8467	0.728022	-0.0658
P17980	P17980	26S proteasome regulatory subunit 6A	PSMC3	23.8002	24.0067	24.2837	24.0302	24.0888	24.2047	23.4493	23.9143	0.69803	-0.115933
P17987	P17987	T-complex protein 1 subunit alpha	TCP1	26.2902	26.8181	26.8786	26.6623	26.693	26.2812	26.4352	26.4698	0.442859	-0.1925
P18031	P18031	Tyrosine-protein phosphatase non-receptor type 1	PTPN1	22.8147	22.5995	22.4308	22.615	22.6641	22.1298	22.6766	22.4902	0.593089	-0.124833
P18077	P18077	Large ribosomal subunit protein eL33	RPL35A	25.2193	26.0031	25.1201	25.4475	24.9313	25.532	25.9306	25.4646	0.968123	0.0171333
P18085	P18085	ADP-ribosylation factor 4	ARF4	21.6847	19.1223	16.4544	19.0871	17.2825	19.2961	21.3719	19.3168	0.910705	0.2297
P18124	P18124	Large ribosomal subunit protein uL30	RPL7	28.3029	28.7656	28.5714	28.5466	28.5046	28.3905	28.1148	28.3366	0.302761	-0.21
P18206	P18206	Vinculin	VCL	16.0103	16.2688	16.4882	16.2558	16.6249	16.4428	15.7409	16.2695	0.966612	0.0137667
P18583	P18583	Protein SON	SON	16.9049	17.1487	16.3961	16.8166	17.0324	17.1825	16.4817	16.8989	0.802208	0.0823
P18615	P18615	Negative elongation factor E	NELFE	20.6643	22.0465	21.8466	21.5191	22.2417	22.5247	21.6542	22.1402	0.297526	0.621067
P18621	P18621	Large ribosomal subunit protein uL22	RPL17	26.9915	27.4068	27.0998	27.166	26.6986	26.6998	26.6698	26.6894	0.0609907	-0.476633
P18754	P18754	Regulator of chromosome condensation	RCC1	24.7211	25.0791	24.5706	24.7903	25.0046	25.277	24.8997	25.0604	0.229819	0.270167
P18858	P18858	DNA ligase 1	LIG1	19.8696	19.8503	19.5133	19.7444	18.9071	18.8077	18.9482	18.8877	0.0105518	-0.856733
P18887	P18887	DNA repair protein XRCC1	XRCC1	21.329	21.6313	21.5728	21.511	22.5634	21.7082	21.8196	22.0304	0.184247	0.519367
P19022;P55283	P19022	Cadherin-2	CDH2	19.265	18.2786	18.1263	18.5566	18.5316	19.0483	18.553	18.711	0.723219	0.154333
P19338	P19338	Nucleolin	NCL	28.2895	29.0453	28.8678	28.7342	28.9935	28.8325	28.3245	28.7168	0.95729	-0.0173667
P19367;Q2TB90;P52790	P19367	Hexokinase-1	HK1	24.7031	24.777	24.4728	24.651	24.4668	24.5734	24.5224	24.5209	0.289368	-0.1301
P19387	P19387	DNA-directed RNA polymerase II subunit RPB3	POLR2C	22.8289	23.8055	22.9772	23.2039	23.9205	23.5928	23.3655	23.6263	0.30584	0.4224
P19388	P19388	DNA-directed RNA polymerases I, II, and III subunit RPABC1	POLR2E	23.5543	24.1827	24.0004	23.9125	23.1333	23.7311	23.7467	23.537	0.244299	-0.375433
P19404	P19404	NADH dehydrogenase [ubiquinone] flavoprotein 2, mitochondrial	NDUFV2	20.224	20.8565	20.7265	20.6023	20.8643	21.474	19.9596	20.766	0.757772	0.163633
P19525	P19525	Interferon-induced, double-stranded RNA-activated protein kinase	EIF2AK2	23.2087	23.5271	23.7299	23.4886	23.6281	23.4425	23.413	23.4945	0.973761	0.00596667
P19784	P19784	Casein kinase II subunit alpha	CSNK2A2	23.8504	23.8796	22.6364	23.4555	23.54	22.7583	23.7107	23.3363	0.825803	-0.119133
P20020;P23634;Q01814;Q16720	P20020	Plasma membrane calcium-transporting ATPase 1	ATP2B1	21.2111	20.649	21.0867	20.9823	20.816	20.295	20.7695	20.6268	0.210057	-0.355433
P20042	P20042	Eukaryotic translation initiation factor 2 subunit 2	EIF2S2	24.7621	25.2841	25.0312	25.0258	24.97	24.2937	23.9597	24.4078	0.16176	-0.618
P20073	P20073	Annexin A7	ANXA7	23.1497	23.3249	23.5285	23.3344	22.3651	23.3885	22.7962	22.8499	0.239024	-0.484433
P20290	P20290	Transcription factor BTF3	BTF3	21.4059	22.1828	22.3648	21.9845	22.2556	22.4834	21.6328	22.1239	0.738293	0.139433
P20339	P20339	Ras-related protein Rab-5A	RAB5A	22.0948	20.3277	21.9936	21.472	21.8725	20.9511	22.1286	21.6507	0.806756	0.1787
P20340;Q9NRW1;Q14964	P20340;Q9NRW1	Ras-related protein Rab-6A;Ras-related protein Rab-6B	RAB6A;RAB6B	25.0505	24.485	25.039	24.8582	24.5468	24.612	25.0483	24.7357	0.643001	-0.122467
P20618	P20618	Proteasome subunit beta type-1	PSMB1	22.7567	23.9416	22.9151	23.2045	23.418	22.7922	22.8692	23.0265	0.700157	-0.178
P20645	P20645	Cation-dependent mannose-6-phosphate receptor	M6PR	23.254	22.7176	23.0696	23.0137	23.3434	23.4002	23.4314	23.3917	0.134821	0.377933
P20674	P20674	Cytochrome c oxidase subunit 5A, mitochondrial	COX5A	24.9632	24.7974	24.3809	24.7138	24.6762	25.466	25.0934	25.0785	0.276465	0.3647
P20700	P20700	Lamin-B1	LMNB1	27.0888	27.8756	27.5988	27.5211	27.8292	27.6193	27.2574	27.5686	0.876108	0.0475667
P20702	P20702	Integrin alpha-X	ITGAX	15.9166	16.8839	17.5149	16.7718	16.4121	16.8669	15.2008	16.1599	0.419701	-0.611867
P20839	P20839	Inosine-5-monophosphate dehydrogenase 1	IMPDH1	20.3225	20.5544	20.386	20.421	20.7563	20.7354	19.8475	20.4464	0.940946	0.0254333
P21127;Q9UQ88	P21127;Q9UQ88	Cyclin-dependent kinase 11B;Cyclin-dependent kinase 11A	CDK11B;CDK11A	21.5383	22.0928	21.529	21.72	21.433	22.1394	21.6936	21.7553	0.905143	0.0353
P21281;P15313	P21281	V-type proton ATPase subunit B, brain isoform	ATP6V1B2	23.8949	24.3425	24.2663	24.1679	24.3012	24.0317	23.8174	24.0501	0.581593	-0.1178
P21283	P21283	V-type proton ATPase subunit C 1	ATP6V1C1	22.6913	23.5711	23.7001	23.3208	23.4789	21.9671	21.6229	22.3563	0.232104	-0.964533
P21291	P21291	Cysteine and glycine-rich protein 1	CSRP1	22.0328	22.8692	20.7151	21.8724	22.4648	22.7296	21.8197	22.338	0.548756	0.465667
P21333	P21333	Filamin-A	FLNA	24.2149	25.4073	25.0732	24.8985	25.2326	24.6332	24.3644	24.7434	0.74293	-0.155067
P21399	P21399	Cytoplasmic aconitate hydratase	ACO1	19.4516	20.3677	20.6396	20.153	20.3724	20.3775	19.8566	20.2022	0.909909	0.0492
P21796	P21796	Voltage-dependent anion-selective channel protein 1	VDAC1	27.4318	26.3579	26.9643	26.918	26.7177	26.2254	27.1397	26.6943	0.6133	-0.223733
P21912	P21912	Succinate dehydrogenase [ubiquinone] iron-sulfur subunit, mitochondrial	SDHB	21.7716	22.4769	22.2517	22.1667	21.8989	22.3341	21.0354	21.7561	0.412624	-0.4106
P21926	P21926	CD9 antigen	CD9	25.3015	25.5147	25.5793	25.4652	25.0892	25.1782	25.7505	25.3393	0.617656	-0.125867
P22033	P22033	Methylmalonyl-CoA mutase, mitochondrial	MMUT	19.9696	19.7378	19.4581	19.7218	18.3967	20.1796	19.9758	19.5174	0.75547	-0.204467
P22059	P22059	Oxysterol-binding protein 1	OSBP	17.1786	15.3461	17.8788	16.8012	17.362	16.4505	15.932	16.5815	0.814949	-0.219667
P22087	P22087	rRNA 2-O-methyltransferase fibrillarin	FBL	24.9945	25.6939	25.4899	25.3928	25.7685	25.4743	25.3737	25.5388	0.58216	0.146067
P22234	P22234	Bifunctional phosphoribosylaminoimidazole carboxylase/phosphoribosylaminoimidazole succinocarboxamide synthetase;Phosphoribosylaminoimidazole carboxylase;Phosphoribosylaminoimidazole succinocarboxamide synthetase	PAICS	23.6557	23.6919	23.8308	23.7261	24.1049	24.2313	24.1826	24.1729	0.0035547	0.4468
P22314	P22314	Ubiquitin-like modifier-activating enzyme 1	UBA1	22.5843	22.5385	22.9063	22.6764	22.0963	22.6525	21.974	22.2409	0.162018	-0.435433
P22392;O60361	P22392;O60361	Nucleoside diphosphate kinase B;Putative nucleoside diphosphate kinase	NME2;NME2P1	24.2062	24.8317	25.0629	24.7003	23.9752	25.1039	24.4836	24.5209	0.688873	-0.179367
P22570	P22570	NADPH:adrenodoxin oxidoreductase, mitochondrial	FDXR	17.9585	17.9423	18.3525	18.0844	19.1606	18.3652	15.995	17.8403	0.822219	-0.244167
P22626	P22626	Heterogeneous nuclear ribonucleoproteins A2/B1	HNRNPA2B1	29.1955	30.0279	29.6912	29.6382	30.0365	29.8404	29.2998	29.7256	0.802685	0.0873667
P22695	P22695	Cytochrome b-c1 complex subunit 2, mitochondrial	UQCRC2	24.2472	21.552	23.2872	23.0288	23.1596	23.0292	23.3861	23.1916	0.856194	0.162833
P23193	P23193	Transcription elongation factor A protein 1	TCEA1	19.3366	19.7166	20.9933	20.0155	21.2742	19.6283	19.6087	20.1704	0.845629	0.1549
P23229	P23229	Integrin alpha-6;Integrin alpha-6 heavy chain;Integrin alpha-6 light chain;Processed integrin alpha-6	ITGA6	20.2122	19.6299	19.4029	19.7483	18.2882	19.2626	20.1184	19.2231	0.436996	-0.525267
P23246	P23246	Splicing factor, proline- and glutamine-rich	SFPQ	26.7696	27.2393	27.32	27.1096	27.3631	27.3001	27.0885	27.2506	0.515241	0.140933
P23258;Q9NRH3	P23258;Q9NRH3	Tubulin gamma-1 chain;Tubulin gamma-2 chain	TUBG1;TUBG2	19.8289	19.7059	19.0518	19.5289	19.9406	20.3227	18.5962	19.6198	0.885251	0.0909667
P23284	P23284	Peptidyl-prolyl cis-trans isomerase B	PPIB	27.1378	27.6991	27.5789	27.4719	27.4218	27.9829	27.3941	27.5996	0.645416	0.127667
P23368	P23368	NAD-dependent malic enzyme, mitochondrial	ME2	21.1771	21.7728	21.7438	21.5646	21.8386	21.1648	21.2162	21.4065	0.615879	-0.158033
P23396	P23396	Small ribosomal subunit protein uS3	RPS3	28.4513	28.8106	28.8168	28.6929	28.4555	28.5567	28.0451	28.3524	0.16461	-0.340467
P23497;Q9H930	P23497	Nuclear autoantigen Sp-100	SP100	18.8199	20.7523	21.159	20.2437	21.3613	19.7715	19.9634	20.3654	0.897306	0.121667
P23526	P23526	Adenosylhomocysteinase	AHCY	23.1232	23.6416	24.0518	23.6055	23.0564	22.6211	22.2547	22.6441	0.0547829	-0.961467
P33778;Q16778;P23527;Q8N257;Q96A08	P33778;Q16778;P23527;Q8N257;Q96A08	Histone H2B type 1-B;Histone H2B type 2-E;Histone H2B type 1-O;Histone H2B type 3-B;Histone H2B type 1-A	H2BC3;H2BC21;H2BC17;H2BC26;H2BC1	27.8603	28.2029	28.0279	28.0304	28.4309	28.5062	28.1	28.3457	0.122387	0.315333
P23528;Q9Y281	P23528	Cofilin-1	CFL1	25.0739	25.4708	25.1491	25.2313	25.1643	23.9418	24.7083	24.6048	0.214603	-0.626467
P23588	P23588	Eukaryotic translation initiation factor 4B	EIF4B	23.474	24.2535	24.1787	23.9687	24.6932	24.2576	23.9558	24.3022	0.367732	0.333467
P24534	P24534	Elongation factor 1-beta	EEF1B2	27.6123	28.031	28.2079	27.9504	28.2032	28.2066	27.5342	27.9813	0.919034	0.0309333
P24539	P24539	ATP synthase F(0) complex subunit B1, mitochondrial	ATP5PB	23.9559	22.1235	23.1493	23.0762	22.3259	22.5104	23.7647	22.867	0.779262	-0.209233
P24752	P24752	Acetyl-CoA acetyltransferase, mitochondrial	ACAT1	22.9798	23.1317	23.2272	23.1129	23.7734	23.3832	22.8576	23.3381	0.489167	0.225167
P24928	P24928	DNA-directed RNA polymerase II subunit RPB1	POLR2A	17.0887	16.7202	16.5746	16.7945	17.2756	17.4816	17.1221	17.2931	0.0622901	0.4986
P24941;Q00526	P24941;Q00526	Cyclin-dependent kinase 2;Cyclin-dependent kinase 3	CDK2;CDK3	20.2077	19.7675	19.6141	19.8631	20.0217	20.3773	19.9773	20.1254	0.30237	0.262333
P25205	P25205	DNA replication licensing factor MCM3	MCM3	25.5391	25.8431	25.638	25.6734	25.6167	25.3797	25.5663	25.5209	0.25822	-0.1525
P25398	P25398	Small ribosomal subunit protein eS12	RPS12	29.0804	29.4435	28.668	29.064	28.6435	29.3352	28.6495	28.8761	0.589491	-0.1879
P25440	P25440	Bromodomain-containing protein 2	BRD2	19.1302	19.5219	19.3662	19.3394	19.3299	19.1415	19.1795	19.217	0.408772	-0.122467
P25445	P25445	Tumor necrosis factor receptor superfamily member 6	FAS	19.9531	19.866	19.2879	19.7023	18.57	19.127	18.9273	18.8748	0.0382178	-0.827567
P25685	P25685	DnaJ homolog subfamily B member 1	DNAJB1	21.8773	22.1939	22.0147	22.0286	22.1164	22.2335	22.1864	22.1788	0.237979	0.150133
P25686	P25686	DnaJ homolog subfamily B member 2	DNAJB2	18.6924	16.8456	18.532	18.0233	20.1516	19.7007	19.648	19.8334	0.0830971	1.8101
P25705	P25705	ATP synthase subunit alpha, mitochondrial	ATP5F1A	27.7042	27.8205	28.1018	27.8755	27.773	27.7383	27.6944	27.7352	0.356399	-0.140267
P25786	P25786	Proteasome subunit alpha type-1	PSMA1	25.2685	24.4116	24.4578	24.7126	24.6102	25.9492	25.341	25.3001	0.291578	0.5875
P25787	P25787	Proteasome subunit alpha type-2	PSMA2	23.7602	23.7657	23.3991	23.6417	24.0258	24.6527	24.0556	24.2447	0.0782025	0.603033
P25788	P25788	Proteasome subunit alpha type-3	PSMA3	24.5049	25.0371	24.5651	24.7024	24.6684	24.8655	24.4099	24.6479	0.812275	-0.0544333
P25789	P25789	Proteasome subunit alpha type-4	PSMA4	23.9946	24.4141	23.202	23.8702	23.9245	25.0565	24.6407	24.5406	0.239751	0.670333
P25942	P25942	Tumor necrosis factor receptor superfamily member 5	CD40	20.8247	21.0762	17.3385	19.7465	20.0112	20.9415	16.296	19.0829	0.740065	-0.663567
P26006	P26006	Integrin alpha-3;Integrin alpha-3 heavy chain;Integrin alpha-3 light chain	ITGA3	24.5231	24.8231	24.7551	24.7004	24.2436	23.9307	24.2796	24.1513	0.0199107	-0.549133
P26038	P26038	Moesin	MSN	25.6524	25.7446	25.6927	25.6966	25.8067	25.644	25.7148	25.7218	0.670953	0.0252667
P26196	P26196	Probable ATP-dependent RNA helicase DDX6	DDX6	23.5164	23.7391	23.4768	23.5774	23.7072	23.9424	23.5188	23.7228	0.387014	0.145367
P26232	P26232	Catenin alpha-2	CTNNA2	18.391	18.7273	20.0645	19.0609	20.0646	18.1243	18.547	18.912	0.857999	-0.148967
P26358	P26358	DNA (cytosine-5)-methyltransferase 1	DNMT1	19.8489	18.3935	18.3247	18.8557	19.1462	18.7733	20.1866	19.3687	0.476799	0.513
P26368	P26368	Splicing factor U2AF 65 kDa subunit	U2AF2	25.7682	26.3389	26.2699	26.1257	26.3972	26.4891	25.7745	26.2203	0.759467	0.0946
P26373	P26373	Large ribosomal subunit protein eL13	RPL13	27.6137	27.8224	27.5416	27.6592	27.5526	28.0548	27.5788	27.7287	0.73034	0.0695
P26440	P26440	Isovaleryl-CoA dehydrogenase, mitochondrial	IVD	22.7297	23.5046	23.1738	23.136	23.1673	23.0101	22.8036	22.9937	0.60818	-0.142367
P26583	P26583	High mobility group protein B2	HMGB2	24.7659	25.187	24.4551	24.8027	25.2325	25.1851	25.3558	25.2578	0.158913	0.455133
P26599	P26599	Polypyrimidine tract-binding protein 1	PTBP1	27.1932	27.7078	27.5626	27.4879	27.6963	27.9045	27.2272	27.6093	0.656809	0.121467
P26639;A2RTX5	P26639	Threonine--tRNA ligase 1, cytoplasmic	TARS1	22.3903	21.84	22.2435	22.1579	22.2793	22.3164	22.4689	22.3549	0.355893	0.196933
P26640	P26640	Valine--tRNA ligase	VARS1	22.8127	22.5891	22.4859	22.6292	22.0611	22.755	23.0323	22.6161	0.968954	-0.0131
P26641	P26641	Elongation factor 1-gamma	EEF1G	27.6526	27.9487	27.8781	27.8265	28.1821	27.8267	27.5722	27.8603	0.875299	0.0338667
P27105	P27105	Stomatin	STOM	25.0909	23.5244	23.8986	24.1713	23.821	23.9593	24.6567	24.1457	0.964934	-0.0256333
P27348	P27348	14-3-3 protein theta	YWHAQ	24.2396	24.6283	23.6619	24.1766	23.7752	23.9475	23.9452	23.8893	0.4146	-0.2873
P27449	P27449	V-type proton ATPase 16 kDa proteolipid subunit c	ATP6V0C	22.6954	17.1293	16.4238	18.7495	16.2937	22.2074	22.3653	20.2888	0.613622	1.5393
P27635;Q96L21	P27635	Large ribosomal subunit protein uL16	RPL10	27.8839	28.2969	27.9939	28.0582	27.7446	27.8493	27.5296	27.7078	0.0916813	-0.3504
P27694	P27694	Replication protein A 70 kDa DNA-binding subunit;Replication protein A 70 kDa DNA-binding subunit, N-terminally processed	RPA1	22.1928	22.7571	24.4453	23.1317	24.6173	22.5842	22.7922	23.3312	0.841563	0.1995
P27695	P27695	DNA repair nuclease/redox regulator APEX1;DNA repair nuclease/redox regulator APEX1, mitochondrial	APEX1	24.6737	24.9148	24.6948	24.7611	24.3326	24.9723	24.7714	24.6921	0.760192	-0.069
P27708	P27708	Multifunctional protein CAD;Glutamine-dependent carbamoyl phosphate synthase;Glutamine amidotransferase;Ammonium-dependent carbamoyl phosphate synthase;Aspartate carbamoyltransferase;Dihydroorotase	CAD	22.6766	22.856	22.9764	22.8363	22.97	22.9255	22.9038	22.9331	0.382703	0.0967667
P27797	P27797	Calreticulin	CALR	25.2289	25.2287	26.4118	25.6231	26.3133	26.0989	25.534	25.9821	0.486268	0.358933
P27816	P27816	Microtubule-associated protein 4	MAP4	20.7323	18.8465	19.6045	19.7278	20.8793	19.558	20.8903	20.4425	0.369813	0.714767
P27824;O14967	P27824	Calnexin	CANX	25.7289	23.9706	24.9124	24.8706	24.7709	24.1163	25.5831	24.8234	0.946674	-0.0472
P28062	P28062	Proteasome subunit beta type-8	PSMB8	19.8872	21.0939	18.2526	19.7446	18.2806	21.1971	16.0411	18.5063	0.518367	-1.2383
P28066	P28066	Proteasome subunit alpha type-5	PSMA5	24.5951	25.3074	25.2443	25.0489	25.2826	25.7322	24.638	25.2176	0.690374	0.168667
P28070	P28070	Proteasome subunit beta type-4	PSMB4	23.3459	23.0144	22.3387	22.8997	23.4452	23.4709	22.9429	23.2863	0.336304	0.386667
P28072	P28072	Proteasome subunit beta type-6	PSMB6	24.4544	24.9737	24.8965	24.7749	25.0191	25.2678	24.4346	24.9072	0.680731	0.1323
P28074	P28074	Proteasome subunit beta type-5	PSMB5	21.6614	20.8795	21.6614	21.4008	22.3074	21.8959	22.0387	22.0807	0.104299	0.6799
P28288	P28288	ATP-binding cassette sub-family D member 3	ABCD3	21.5207	18.3507	18.9994	19.6236	18.7063	19.1959	20.8051	19.5691	0.965001	-0.0545
P28290	P28290	Protein ITPRID2	ITPRID2	15.6609	17.7474	15.5202	16.3095	17.8578	17.0896	17.0031	17.3168	0.295758	1.00733
P28331	P28331	NADH-ubiquinone oxidoreductase 75 kDa subunit, mitochondrial	NDUFS1	21.2262	21.2517	21.8197	21.4325	21.7807	21.5193	20.9553	21.4184	0.966138	-0.0141
P28340	P28340	DNA polymerase delta catalytic subunit	POLD1	18.1094	17.9103	17.2256	17.7484	15.845	18.1885	16.8938	16.9758	0.377152	-0.772667
P28347;Q15561;Q99594;Q15562	P28347	Transcriptional enhancer factor TEF-1	TEAD1	20.0708	20.466	20.506	20.3476	20.6407	20.244	20.0408	20.3085	0.870528	-0.0391
P28370	P28370	Probable global transcription activator SNF2L1	SMARCA1	18.3452	16.4867	18.0325	17.6215	17.9426	18.4634	18.7056	18.3705	0.323445	0.749067
P28482	P28482	Mitogen-activated protein kinase 1	MAPK1	20.3598	19.4924	20.2084	20.0202	20.3944	20.345	19.5978	20.1124	0.816196	0.0922
P28749	P28749	Retinoblastoma-like protein 1	RBL1	18.9995	18.2841	18.3932	18.5589	18.6288	18.7533	15.8535	17.7452	0.483066	-0.813733
P28799	P28799	Progranulin;Paragranulin;Granulin-1;Granulin-2;Granulin-3;Granulin-4;Granulin-5;Granulin-6;Granulin-7	GRN	20.3155	18.9136	18.5566	19.2619	19.9529	18.2895	19.8768	19.3731	0.891207	0.111167
P28838	P28838	Cytosol aminopeptidase	LAP3	19.7137	19.5593	20.4463	19.9064	19.8987	19.7599	19.3738	19.6775	0.517574	-0.228967
P29083	P29083	General transcription factor IIE subunit 1	GTF2E1	20.0748	20.805	20.5477	20.4758	20.6173	20.6021	20.1495	20.4563	0.944748	-0.0195333
P29084	P29084	Transcription initiation factor IIE subunit beta	GTF2E2	19.385	19.9484	19.3147	19.5494	19.5719	19.6453	19.1658	19.461	0.742889	-0.0883667
P29144	P29144	Tripeptidyl-peptidase 2	TPP2	16.6283	17.2846	17.6792	17.1974	17.622	17.0754	16.5665	17.088	0.812658	-0.1094
P29279	P29279	CCN family member 2	CCN2	23.0206	23.6808	22.977	23.2261	22.8919	23.16	22.9431	22.9983	0.428061	-0.2278
P29317;P54760;Q15375;P54753;Q9UF33;P54756;P29320;P54764;P29322	P29317	Ephrin type-A receptor 2	EPHA2	24.5724	24.2239	24.2321	24.3428	24.1587	23.8328	24.5165	24.1693	0.499404	-0.173467
P29323;P54762	P29323;P54762	Ephrin type-B receptor 2;EphB2/CTF1;EphB2/CTF2;Ephrin type-B receptor 1	EPHB2;EPHB1	18.4176	16.2495	16.7557	17.1409	17.4946	16.3521	16.1601	16.6689	0.58142	-0.472
P29372	P29372	DNA-3-methyladenine glycosylase	MPG	17.7576	17.0038	17.0579	17.2731	20.3014	14.5999	17.841	17.5808	0.870099	0.307667
P29401	P29401	Transketolase	TKT	24.5517	25.3678	25.3699	25.0965	25.2338	25.0286	24.1765	24.813	0.540485	-0.2835
P29508;P48594	P29508;P48594	Serpin B3;Serpin B4	SERPINB3;SERPINB4	19.5663	20.5261	18.7117	19.6014	18.4023	17.3855	17.4661	17.7513	0.0502783	-1.85007
P29558;Q6XE24	P29558	RNA-binding motif, single-stranded-interacting protein 1	RBMS1	22.8536	23.5009	23.2932	23.2159	23.3035	23.4517	22.6559	23.137	0.812434	-0.0788667
P29692	P29692	Elongation factor 1-delta	EEF1D	28.8164	29.2732	29.1611	29.0836	29.6416	29.3812	28.74	29.2543	0.610599	0.1707
P29992	P29992	Guanine nucleotide-binding protein subunit alpha-11	GNA11	20.8471	21.0284	20.9712	20.9489	21.3336	20.5407	21.4096	21.0946	0.654643	0.145733
P30040	P30040	Endoplasmic reticulum resident protein 29	ERP29	22.5848	22.8129	22.8148	22.7375	23.4945	23.2027	22.8044	23.1672	0.15347	0.4297
P30041	P30041	Peroxiredoxin-6	PRDX6	21.5246	22.8989	22.61	22.3445	22.6579	21.0766	20.6644	21.4663	0.30735	-0.8782
P30048	P30048	Thioredoxin-dependent peroxide reductase, mitochondrial	PRDX3	26.8363	27.4584	27.3439	27.2129	27.338	27.2228	26.8073	27.1227	0.737119	-0.0901667
P30049	P30049	ATP synthase subunit delta, mitochondrial	ATP5F1D	26.7593	26.8242	26.6671	26.7502	26.8444	27.216	26.5984	26.8863	0.531315	0.136067
P30050	P30050	Large ribosomal subunit protein uL11	RPL12	27.8044	28.1223	27.7233	27.8833	27.7491	27.675	27.6546	27.6929	0.255224	-0.190433
P30084	P30084	Enoyl-CoA hydratase, mitochondrial	ECHS1	21.3065	21.7869	22.4381	21.8438	22.3844	22.0616	21.2525	21.8995	0.911424	0.0556667
P30101	P30101	Protein disulfide-isomerase A3	PDIA3	24.678	25.2195	25.1892	25.0289	25.6617	25.3731	24.9458	25.3269	0.336776	0.297967
P30153	P30153	Serine/threonine-protein phosphatase 2A 65 kDa regulatory subunit A alpha isoform	PPP2R1A	23.4891	23.9245	23.7437	23.7191	23.861	23.7945	23.6876	23.781	0.683856	0.0619333
P30154	P30154	Serine/threonine-protein phosphatase 2A 65 kDa regulatory subunit A beta isoform	PPP2R1B	19.2211	19.833	19.307	19.4537	19.5696	19.0454	18.7678	19.1276	0.344805	-0.3261
P30260	P30260	Cell division cycle protein 27 homolog	CDC27	18.6776	17.68	16.902	17.7532	17.0141	18.261	18.5533	17.9428	0.799361	0.1896
P30419;O60551	P30419	Glycylpeptide N-tetradecanoyltransferase 1	NMT1	23.6167	23.567	23.7976	23.6604	23.8408	23.5723	23.314	23.5757	0.649816	-0.0847333
P30519	P30519	Heme oxygenase 2;Heme oxygenase 2 soluble form	HMOX2	21.4959	20.0831	19.1053	20.2281	19.8171	19.4745	21.4946	20.2621	0.972731	0.0339667
P30530	P30530	Tyrosine-protein kinase receptor UFO	AXL	18.3011	17.2404	17.4721	17.6712	17.4089	15.9563	16.2149	16.5267	0.113458	-1.1445
P30533	P30533	Alpha-2-macroglobulin receptor-associated protein	LRPAP1	22.6334	22.9965	22.9343	22.8547	23.5717	23.0652	22.8468	23.1612	0.294658	0.3065
P30566	P30566	Adenylosuccinate lyase	ADSL	21.7657	21.2788	21.132	21.3922	20.9458	21.377	21.2772	21.2	0.459249	-0.192167
P30626	P30626	Sorcin	SRI	22.9377	23.8037	22.0915	22.9443	22.1447	22.5478	22.9191	22.5372	0.511313	-0.4071
P30825;P52569	P30825	High affinity cationic amino acid transporter 1	SLC7A1	21.6111	18.9798	17.0238	19.2049	20.8657	20.765	18.923	20.1846	0.555299	0.979667
P30837	P30837	Aldehyde dehydrogenase X, mitochondrial	ALDH1B1	22.717	23.1135	23.1086	22.9797	23.0098	22.4251	22.4513	22.6287	0.21294	-0.350967
P30876	P30876	DNA-directed RNA polymerase II subunit RPB2	POLR2B	21.1579	21.9938	21.246	21.4659	20.8814	21.453	21.3901	21.2415	0.52784	-0.2244
P31025;Q5VSP4	P31025;Q5VSP4	Lipocalin-1;Putative lipocalin 1-like protein 1	LCN1;LCN1P1	21.6119	24.3981	23.3875	23.1325	23.1792	22.2815	21.2227	22.2278	0.418933	-0.9047
P31040	P31040	Succinate dehydrogenase [ubiquinone] flavoprotein subunit, mitochondrial	SDHA	22.1226	21.8105	22.0972	22.0101	22.0688	21.7494	21.9831	21.9338	0.610407	-0.0763333
P31153;Q00266	P31153	S-adenosylmethionine synthase isoform type-2	MAT2A	20.975	22.8331	23.0406	22.2829	21.1671	22.7632	21.5474	21.8259	0.607109	-0.457
P31327	P31327	Carbamoyl-phosphate synthase [ammonia], mitochondrial	CPS1	15.7942	16.1469	21.0195	17.6535	18.3673	16.6447	14.4799	16.4973	0.603076	-1.15623
P31483	P31483	Cytotoxic granule associated RNA binding protein TIA1	TIA1	22.0948	22.5084	22.1789	22.2607	22.9067	22.8455	22.2291	22.6604	0.202649	0.399733
P31689	P31689	DnaJ homolog subfamily A member 1	DNAJA1	25.1133	25.3617	25.5302	25.3351	25.3181	25.3321	24.6574	25.1025	0.424718	-0.232533
P31930	P31930	Cytochrome b-c1 complex subunit 1, mitochondrial	UQCRC1	24.0249	21.7609	22.9911	22.9256	22.3052	22.7382	23.437	22.8268	0.901371	-0.0988333
P31937	P31937	3-hydroxyisobutyrate dehydrogenase, mitochondrial	HIBADH	19.6277	17.1972	20.7022	19.1757	19.8954	20.5066	19.7218	20.0413	0.494147	0.865567
P31939	P31939	Bifunctional purine biosynthesis protein ATIC;Phosphoribosylaminoimidazolecarboxamide formyltransferase;Inosine 5-monophosphate cyclohydrolase;Bifunctional purine biosynthesis protein ATIC, N-terminally processed	ATIC	18.7957	18.8465	19.4496	19.0306	18.9841	16.9606	18.8649	18.2699	0.36725	-0.760733
P31942	P31942	Heterogeneous nuclear ribonucleoprotein H3	HNRNPH3	27.6441	28.2418	28.0209	27.9689	28.2728	28.2854	27.482	28.0134	0.896522	0.0444667
P31943	P31943	Heterogeneous nuclear ribonucleoprotein H;Heterogeneous nuclear ribonucleoprotein H, N-terminally processed	HNRNPH1	28.1311	28.7438	28.4716	28.4488	28.7677	28.7866	27.9362	28.4968	0.893149	0.048
P31944	P31944	Caspase-14;Caspase-14 subunit p17, mature form;Caspase-14 subunit p10, mature form;Caspase-14 subunit p20, intermediate form;Caspase-14 subunit p8, intermediate form	CASP14	18.6468	19.8956	20.0351	19.5258	18.8939	18.9959	16.4177	18.1025	0.230981	-1.42333
P31946	P31946	14-3-3 protein beta/alpha;14-3-3 protein beta/alpha, N-terminally processed	YWHAB	24.4017	25.6964	25.0025	25.0335	25.403	25.2657	25.2046	25.2911	0.56365	0.257567
P31947	P31947	14-3-3 protein sigma	SFN	24.9684	25.4251	25.032	25.1418	25.148	25.1428	24.6899	24.9936	0.516334	-0.148267
P31948	P31948	Stress-induced-phosphoprotein 1	STIP1	25.5011	26.1105	26.085	25.8989	26.072	25.8615	25.3931	25.7755	0.685058	-0.123333
P31949	P31949	Protein S100-A11;Protein S100-A11, N-terminally processed	S100A11	20.4258	24.3485	20.9402	21.9048	21.3739	23.8928	24.115	23.1272	0.468729	1.2224
P32119	P32119	Peroxiredoxin-2	PRDX2	21.4729	23.5233	23.4973	22.8312	22.2902	23.0926	22.6382	22.6737	0.843217	-0.1575
P32322	P32322	Pyrroline-5-carboxylate reductase 1, mitochondrial	PYCR1	26.5131	27.039	26.8483	26.8001	26.8587	26.7985	26.271	26.6427	0.551837	-0.1574
P32969	P32969	Large ribosomal subunit protein uL6	RPL9	27.3039	27.7027	27.5333	27.5133	27.0235	27.4237	27.1906	27.2126	0.140234	-0.3007
P32970	P32970	CD70 antigen	CD70	20.9625	15.9332	17.1588	18.0182	17.2291	16.6075	17.8745	17.237	0.661159	-0.781133
P33176;O60282;Q12840	P33176	Kinesin-1 heavy chain	KIF5B	20.6174	20.6315	20.4317	20.5602	20.821	20.3339	20.5677	20.5742	0.93396	0.014
P33240;Q9H0L4	P33240;Q9H0L4	Cleavage stimulation factor subunit 2;Cleavage stimulation factor subunit 2 tau variant	CSTF2;CSTF2T	23.3711	23.7281	23.5515	23.5502	24.2466	24.1714	23.6205	24.0128	0.12883	0.4626
P33316	P33316	Deoxyuridine 5-triphosphate nucleotidohydrolase, mitochondrial	DUT	20.6043	22.2403	21.3832	21.4093	20.2213	21.1084	20.7252	20.685	0.26836	-0.7243
P33991;Q9UJA3	P33991	DNA replication licensing factor MCM4	MCM4	23.7749	24.3317	23.9167	24.0078	24.2383	24.1299	23.8864	24.0849	0.718867	0.0771
P33992	P33992	DNA replication licensing factor MCM5	MCM5	24.3226	24.2611	24.605	24.3962	24.0171	23.7131	24.2497	23.9933	0.107907	-0.402933
P33993	P33993	DNA replication licensing factor MCM7	MCM7	24.8227	25.2041	25.0026	25.0098	25.4746	25.2163	25.3064	25.3324	0.081493	0.322633
P34897;P34896	P34897	Serine hydroxymethyltransferase, mitochondrial	SHMT2	25.2768	25.1862	25.7239	25.3956	25.357	25.995	25.1634	25.5051	0.73727	0.1095
P34932	P34932	Heat shock 70 kDa protein 4	HSPA4	24.0973	24.202	24.0296	24.1096	24.2021	24.088	23.8787	24.0563	0.652265	-0.0533667
P35030	P35030	Trypsin-3	PRSS3	16.6327	16.9931	22.8658	18.8305	22.7805	21.5758	18.381	20.9124	0.443695	2.0819
P35052	P35052	Glypican-1;Secreted glypican-1	GPC1	17.2695	19.658	19.4248	18.7841	19.9234	19.5084	18.5901	19.3406	0.562036	0.556533
P35221;Q9UI47;REV__Q9P2T0	P35221	Catenin alpha-1	CTNNA1	23.3939	23.2137	22.3724	22.9933	22.7024	22.6285	23.247	22.8593	0.739108	-0.134033
P35222	P35222	Catenin beta-1	CTNNB1	22.7428	22.6875	22.9093	22.7799	22.4857	22.0595	22.6872	22.4108	0.174893	-0.369067
P35226	P35226	Polycomb complex protein BMI-1	BMI1	19.8243	20.2027	20.2736	20.1002	20.4794	20.3919	19.894	20.2551	0.539144	0.1549
P35232	P35232	Prohibitin 1	PHB1	27.5666	27.9408	27.802	27.7698	27.8364	27.7767	27.2816	27.6316	0.547474	-0.138233
P35240	P35240	Merlin	NF2	17.9045	17.9595	17.714	17.8593	18.1017	17.8818	17.7396	17.9077	0.728639	0.0483667
P35241	P35241	Radixin	RDX	20.448	20.8376	20.5288	20.6048	20.8551	21.0427	20.23	20.7093	0.728271	0.104467
P35244	P35244	Replication protein A 14 kDa subunit	RPA3	21.724	22.1891	22.4562	22.1231	21.2125	22.8173	20.8158	21.6152	0.501151	-0.5079
P35249	P35249	Replication factor C subunit 4	RFC4	22.6371	23.5588	23.2021	23.1327	23.6538	23.6296	23.0523	23.4452	0.405066	0.312567
P35250	P35250	Replication factor C subunit 2	RFC2	22.8277	23.0519	22.7872	22.8889	22.9821	23.2295	22.8572	23.0229	0.387048	0.134
P35251	P35251	Replication factor C subunit 1	RFC1	20.1766	18.9892	15.6035	18.2564	18.6298	17.638	20.4753	18.9144	0.706639	0.657933
P35268	P35268	Large ribosomal subunit protein eL22	RPL22	27.8222	28.3436	27.8774	28.0144	27.6359	27.881	27.5383	27.6851	0.179514	-0.329333
P35269	P35269	General transcription factor IIF subunit 1	GTF2F1	22.4278	23.0641	23.0055	22.8325	23.0733	22.8476	22.5298	22.8169	0.954785	-0.0155667
P35579;P12883;P12882;Q9UKX2;Q9Y623;P13535;P11055;Q9UKX3;A7E2Y1;REV__Q9UKV3	P35579	Myosin-9	MYH9	26.3159	26.7031	26.5007	26.5066	26.8683	26.4336	26.5132	26.605	0.603055	0.0984667
P35580	P35580	Myosin-10	MYH10	19.7836	20.1686	19.2221	19.7248	20.029	20.7963	20.8187	20.548	0.095207	0.823233
P35606	P35606	Coatomer subunit beta	COPB2	23.625	23.9135	23.808	23.7822	23.8284	23.0557	23.6905	23.5249	0.396561	-0.2573
P35609	P35609	Alpha-actinin-2	ACTN2	16.9627	15.7306	16.8305	16.5079	16.6665	17.2733	16.3616	16.7671	0.616827	0.2592
P35610	P35610	Sterol O-acyltransferase 1	SOAT1	21.3223	19.25	21.5101	20.6941	20.8229	18.0756	21.3862	20.0949	0.660051	-0.599233
P35611;P35612	P35611	Alpha-adducin	ADD1	21.6365	22.6936	21.4671	21.9324	22.1372	22.0488	22.1393	22.1084	0.691813	0.176033
P35613	P35613	Basigin	BSG	25.3807	25.0484	25.3522	25.2604	24.5084	24.6381	24.8224	24.6563	0.0131498	-0.604133
P35637	P35637	RNA-binding protein FUS	FUS	26.5828	27.1637	27.0916	26.946	27.2675	27.1897	26.5871	27.0148	0.819857	0.0687333
P35658	P35658	Nuclear pore complex protein Nup214	NUP214	18.587	19.4045	19.3565	19.116	18.6416	19.7813	20.1272	19.5167	0.49408	0.4007
P35659	P35659	Protein DEK	DEK	25.6021	25.9752	25.5759	25.7177	25.593	25.4115	25.55	25.5182	0.259023	-0.199567
P35913	P35913	Rod cGMP-specific 3,5-cyclic phosphodiesterase subunit beta	PDE6B	19.7527	21.6968	21.1405	20.8633	20.845	19.8839	18.923	19.884	0.288799	-0.979367
P35998	P35998	26S proteasome regulatory subunit 7	PSMC2	22.7976	23.414	23.3033	23.1716	23.5542	23.2989	23.0382	23.2971	0.631884	0.125467
P36542	P36542	ATP synthase subunit gamma, mitochondrial	ATP5F1C	25.6655	24.8186	24.6603	25.0481	24.8603	25.2645	25.4322	25.1857	0.723774	0.137533
P36543;Q96A05	P36543	V-type proton ATPase subunit E 1	ATP6V1E1	22.7641	20.847	23.3148	22.3086	22.9692	23.5295	22.815	23.1046	0.400803	0.795933
P36578	P36578	Large ribosomal subunit protein uL4	RPL4	28.0184	28.3164	28.2381	28.191	28.0016	28.2534	28.0181	28.091	0.454617	-0.0999333
P36776	P36776	Lon protease homolog, mitochondrial	LONP1	25.2524	26.561	27.0259	26.2798	26.7372	25.1521	24.8605	25.5833	0.427404	-0.6965
P36873	P36873	Serine/threonine-protein phosphatase PP1-gamma catalytic subunit	PPP1CC	21.4885	23.2639	22.7272	22.4932	23.092	22.9906	22.5993	22.894	0.530383	0.400767
P36915	P36915	Guanine nucleotide-binding protein-like 1	GNL1	18.2292	18.7145	18.3715	18.4384	18.5313	17.8593	19.2967	18.5624	0.799689	0.124033
P36954	P36954	DNA-directed RNA polymerase II subunit RPB9	POLR2I	22.6828	22.6949	22.514	22.6306	22.1437	23.0976	22.1237	22.455	0.641754	-0.175567
P36957	P36957	Dihydrolipoyllysine-residue succinyltransferase component of 2-oxoglutarate dehydrogenase complex, mitochondrial	DLST	24.8199	24.817	25.0443	24.8937	25.1276	24.9207	24.6914	24.9132	0.902063	0.0195
P37108	P37108	Signal recognition particle 14 kDa protein	SRP14	25.6866	26.2881	26.1	26.0249	25.9016	26.2874	25.9955	26.0615	0.872739	0.0366
P37198	P37198	Nuclear pore glycoprotein p62	NUP62	23.0125	24.0712	24.0446	23.7094	24.7205	24.6027	23.7292	24.3508	0.2434	0.641367
P37235	P37235	Hippocalcin-like protein 1	HPCAL1	16.2147	18.2468	18.4776	17.6464	17.6663	17.1888	18.8435	17.8995	0.787547	0.253167
P37268	P37268	Squalene synthase	FDFT1	20.7216	20.9265	20.3247	20.6576	21.1955	21.6004	21.0699	21.2886	0.0577263	0.631
P37802	P37802	Transgelin-2	TAGLN2	20.9256	20.329	19.8396	20.3647	18.6317	20.1524	19.0012	19.2618	0.127051	-1.10297
P37837	P37837	Transaldolase	TALDO1	21.4452	22.633	22.4424	22.1735	22.7067	21.5658	21.4898	21.9208	0.663636	-0.252767
P38159;O75526;Q8N7X1	P38159	RNA-binding motif protein, X chromosome;RNA-binding motif protein, X chromosome, N-terminally processed	RBMX	26.1517	26.6381	26.7304	26.5067	26.8255	26.631	26.1086	26.5217	0.959916	0.0149667
P38432	P38432	Coilin	COIL	20.1989	20.2767	20.5823	20.3526	18.8176	20.2327	19.5901	19.5468	0.180655	-0.805833
P38606	P38606	V-type proton ATPase catalytic subunit A	ATP6V1A	23.3764	23.5515	23.5877	23.5052	23.9201	23.5279	23.8329	23.7603	0.153441	0.2551
P38646	P38646	Stress-70 protein, mitochondrial	HSPA9	27.1792	27.6682	27.641	27.4961	28.1078	27.6932	27.3015	27.7008	0.512712	0.2047
P38919	P38919	Eukaryotic initiation factor 4A-III;Eukaryotic initiation factor 4A-III, N-terminally processed	EIF4A3	25.4882	25.8387	26.0461	25.791	26.01	26.1666	25.8551	26.0106	0.319996	0.219567
P39019	P39019	Small ribosomal subunit protein eS19	RPS19	27.7887	28.2209	27.8367	27.9488	27.9144	27.8896	27.788	27.864	0.604018	-0.0847667
P39023;Q92901	P39023	Large ribosomal subunit protein uL3	RPL3	27.2903	27.7747	27.5427	27.5359	27.4556	27.374	27.1163	27.3153	0.277748	-0.2206
P39656	P39656	Dolichyl-diphosphooligosaccharide--protein glycosyltransferase 48 kDa subunit	DDOST	25.6496	23.684	24.7974	24.7103	23.5921	23.1651	25.4761	24.0778	0.526892	-0.632567
P39687;O95626;O43423	P39687	Acidic leucine-rich nuclear phosphoprotein 32 family member A	ANP32A	26.7058	25.7443	26.7889	26.413	26.9072	26.7897	26.6084	26.7684	0.401542	0.355433
P39748	P39748	Flap endonuclease 1	FEN1	24.5813	24.5294	24.6759	24.5955	24.8745	24.4691	24.8497	24.7311	0.413685	0.135567
P40222	P40222	Alpha-taxilin	TXLNA	23.8247	24.279	24.3245	24.1427	24.5328	24.4463	23.7198	24.233	0.783577	0.0902333
P40227	P40227	T-complex protein 1 subunit zeta	CCT6A	26.1602	27.2138	27.161	26.845	27.1915	26.5355	26.5578	26.7616	0.848555	-0.0834
P40429;Q6NVV1	P40429	Large ribosomal subunit protein uL13	RPL13A	27.3593	27.7822	27.6643	27.6019	27.4252	27.51	27.1587	27.3646	0.224768	-0.2373
P40692	P40692	DNA mismatch repair protein Mlh1	MLH1	17.3992	16.8603	17.0851	17.1149	17.2512	16.54	15.4071	16.3994	0.313087	-0.715433
P40926	P40926	Malate dehydrogenase, mitochondrial	MDH2	24.6777	26.1236	25.6749	25.4921	25.7662	25.7688	24.8541	25.463	0.958792	-0.0290333
P40937	P40937	Replication factor C subunit 5	RFC5	22.2317	22.4656	22.1018	22.2664	22.1972	22.373	21.924	22.1647	0.580185	-0.101633
P40938	P40938	Replication factor C subunit 3	RFC3	21.3511	21.7212	21.8588	21.6437	21.8634	22.4824	21.1555	21.8338	0.680389	0.190067
P40939	P40939	Trifunctional enzyme subunit alpha, mitochondrial;Long-chain enoyl-CoA hydratase;Long chain 3-hydroxyacyl-CoA dehydrogenase	HADHA	25.878	25.4537	25.5705	25.6341	25.7928	25.6644	25.8755	25.7776	0.385238	0.1435
P41091;Q2VIR3	P41091;Q2VIR3	Eukaryotic translation initiation factor 2 subunit 3;Eukaryotic translation initiation factor 2 subunit 3B	EIF2S3;EIF2S3B	25.2785	25.4188	25.6809	25.4594	25.4582	25.2067	25.0008	25.2219	0.252064	-0.2375
P41208	P41208	Centrin-2	CETN2	21.7897	20.4791	16.8082	19.6923	20.4397	21.8163	21.2839	21.18	0.425747	1.48763
P41223	P41223	Protein BUD31 homolog	BUD31	22.9197	23.7287	23.6317	23.4267	22.3241	23.7055	23.2445	23.0914	0.529628	-0.335333
P41227;Q9BSU3	P41227	N-alpha-acetyltransferase 10	NAA10	19.9144	20.6544	20.6081	20.3923	22.6958	21.1874	20.6816	21.5216	0.194469	1.1293
P41250	P41250	Glycine--tRNA ligase	GARS1	21.2868	21.3869	21.3362	21.3366	21.3649	21.3769	20.9109	21.2176	0.520603	-0.119067
P41252	P41252	Isoleucine--tRNA ligase, cytoplasmic	IARS1	23.8074	24.5492	24.1988	24.1851	24.1571	23.6155	24.1009	23.9578	0.456534	-0.2273
P41567;O60739	P41567;O60739	Eukaryotic translation initiation factor 1;Eukaryotic translation initiation factor 1b	EIF1;EIF1B	23.0224	23.6058	23.2031	23.2771	23.8712	23.5638	23.0077	23.4809	0.546269	0.2038
P41743	P41743	Protein kinase C iota type	PRKCI	19.7412	20.0898	20.5417	20.1242	20.8046	19.8877	19.6024	20.0982	0.955206	-0.026
P42025	P42025	Beta-centractin	ACTR1B	20.535	20.6395	20.7826	20.6524	21.0007	20.9475	20.5638	20.8373	0.318736	0.184967
P42126	P42126	Enoyl-CoA delta isomerase 1, mitochondrial	ECI1	21.6194	22.203	20.4709	21.4311	18.2684	21.7807	20.5816	20.2102	0.368045	-1.22087
P42166	P42166	Lamina-associated polypeptide 2, isoform alpha;Thymopoietin;Thymopentin	TMPO	23.1087	23.3219	22.9291	23.1199	23.5372	23.389	23.2597	23.3953	0.12647	0.2754
P42167	P42167	Lamina-associated polypeptide 2, isoforms beta/gamma;Thymopoietin;Thymopentin	TMPO	20.5468	15.9384	19.1983	18.5612	19.1895	17.2836	21.0194	19.1642	0.747562	0.603
P42285	P42285	Exosome RNA helicase MTR4	MTREX	22.7702	22.9935	23.0834	22.949	23.0305	22.9897	23.0413	23.0205	0.524416	0.0714667
P42345	P42345	Serine/threonine-protein kinase mTOR	MTOR	15.7941	17.7387	16.6406	16.7245	15.7443	16.0911	16.081	15.9721	0.311993	-0.752333
P42566	P42566	Epidermal growth factor receptor substrate 15	EPS15	19.4223	19.9683	19.9824	19.791	18.9284	20.3237	19.8241	19.6921	0.840374	-0.0989333
P42677	P42677	Small ribosomal subunit protein eS27	RPS27	27.4297	28.0383	26.8759	27.448	26.9469	27.0802	27.0418	27.023	0.33262	-0.425
P42695	P42695	Condensin-2 complex subunit D3	NCAPD3	18.0101	16.8038	17.7896	17.5345	16.7887	16.3023	17.5395	16.8768	0.272126	-0.657667
P42696	P42696	RNA-binding protein 34	RBM34	20.104	19.7783	17.2198	19.034	20.1277	21.5725	21.6414	21.1139	0.136208	2.07983
P42704	P42704	Leucine-rich PPR motif-containing protein, mitochondrial	LRPPRC	24.9116	25.0668	25.0086	24.9957	24.6625	25.0381	25.0485	24.9164	0.605176	-0.0793
P42765	P42765	3-ketoacyl-CoA thiolase, mitochondrial	ACAA2	22.6142	21.8926	22.2993	22.2687	22.148	22.8802	21.3406	22.1229	0.787025	-0.145767
P42766	P42766	Large ribosomal subunit protein uL29	RPL35	27.3698	27.6583	27.1037	27.3773	26.9951	27.6223	27.4764	27.3646	0.961794	-0.0126667
P42785	P42785	Lysosomal Pro-X carboxypeptidase	PRCP	19.9085	19.7985	19.8544	19.8538	19.6277	19.7101	19.7883	19.7087	0.069147	-0.1451
P42892	P42892	Endothelin-converting enzyme 1	ECE1	18.1979	18.5478	18.4243	18.39	18.3571	17.5959	18.5228	18.1586	0.510701	-0.2314
P43007	P43007	Neutral amino acid transporter A	SLC1A4	22.637	21.008	22.5243	22.0564	22.3456	21.1515	22.5692	22.0221	0.96251	-0.0343333
P43034	P43034	Platelet-activating factor acetylhydrolase IB subunit beta	PAFAH1B1	23.0472	23.7428	23.4088	23.3996	23.1751	23.4309	22.4121	23.006	0.351595	-0.393567
P43121	P43121	Cell surface glycoprotein MUC18	MCAM	23.4817	23.4729	23.4433	23.466	22.865	23.0219	23.2261	23.0377	0.0531151	-0.4283
P43243	P43243	Matrin-3	MATR3	25.4794	25.8732	25.6185	25.657	25.8687	25.9759	25.5913	25.812	0.394518	0.154933
P43246	P43246	DNA mismatch repair protein Msh2	MSH2	24.1476	24.1672	24.1237	24.1462	24.2628	24.0616	23.9497	24.0914	0.611559	-0.0548
P43304	P43304	Glycerol-3-phosphate dehydrogenase, mitochondrial	GPD2	22.2563	21.5845	22.2744	22.0384	22.0943	22.1986	22.4288	22.2406	0.479301	0.202167
P43307	P43307	Translocon-associated protein subunit alpha	SSR1	24.7017	20.0645	23.193	22.6531	22.7755	22.293	24.4432	23.1706	0.755863	0.5175
P43355;P43361;O60732;O15480;A2A368;Q96M61;A8MXT2	P43355	Melanoma-associated antigen 1	MAGEA1	21.8424	22.6304	22.855	22.4426	22.7084	22.1846	21.6516	22.1815	0.578926	-0.261067
P43358;P43363;P43362	P43358	Melanoma-associated antigen 4	MAGEA4	22.9884	23.7046	23.4495	23.3808	23.7573	22.5028	25.9792	24.0798	0.565257	0.698933
P43487	P43487	Ran-specific GTPase-activating protein	RANBP1	23.2837	23.3835	23.9772	23.5481	24.1311	23.8177	23.0507	23.6665	0.777041	0.118367
P43686	P43686	26S proteasome regulatory subunit 6B	PSMC4	22.4494	23.1269	22.6626	22.7463	23.1411	22.7423	22.4476	22.777	0.918986	0.0307
P45880	P45880	Voltage-dependent anion-selective channel protein 2	VDAC2	27.1595	26.1719	26.5728	26.6347	26.3117	26.2341	26.8956	26.4805	0.688066	-0.154267
P45954	P45954	Short/branched chain specific acyl-CoA dehydrogenase, mitochondrial	ACADSB	19.7339	19.8888	20.1633	19.9287	20.2235	19.7551	19.1555	19.7114	0.566963	-0.2173
P45973	P45973	Chromobox protein homolog 5	CBX5	24.9176	25.1208	24.478	24.8388	24.4044	24.692	24.9465	24.681	0.557197	-0.157833
P45974;Q92995	P45974	Ubiquitin carboxyl-terminal hydrolase 5	USP5	20.3817	20.7078	20.7333	20.6076	20.7362	20.4384	20.0049	20.3932	0.437448	-0.214433
P46013	P46013	Proliferation marker protein Ki-67	MKI67	18.9804	16.2348	18.2896	17.8349	19.916	17.4646	19.2278	18.8695	0.401432	1.03453
P46060	P46060	Ran GTPase-activating protein 1	RANGAP1	23.6246	23.9271	23.2425	23.5981	24.0468	24.1566	23.7407	23.9814	0.18987	0.3833
P46063	P46063	ATP-dependent DNA helicase Q1	RECQL	24.8033	25.1462	24.7369	24.8955	24.9016	24.5075	24.5586	24.6559	0.247781	-0.239567
P46087	P46087	Probable 28S rRNA (cytosine(4447)-C(5))-methyltransferase	NOP2	23.9722	23.9268	24.048	23.9823	24.4522	24.3469	24.6546	24.4846	0.0197331	0.502233
P46379	P46379	Large proline-rich protein BAG6	BAG6	20.8912	21.0891	21.9208	21.3004	21.7454	21.9877	21.2139	21.649	0.425903	0.348633
P46459	P46459	Vesicle-fusing ATPase	NSF	22.7392	23.1212	23.1031	22.9878	23.4474	22.2104	22.58	22.7459	0.585256	-0.2419
P46734	P46734	Dual specificity mitogen-activated protein kinase kinase 3	MAP2K3	17.8637	17.0017	17.0836	17.3163	17.2414	15.2286	17.5094	16.6598	0.466109	-0.656533
P46736	P46736	Lys-63-specific deubiquitinase BRCC36	BRCC3	19.9262	20.537	19.9421	20.1351	19.962	20.0214	19.2169	19.7334	0.291356	-0.401667
P46776	P46776	Large ribosomal subunit protein uL15	RPL27A	28.0567	28.3806	27.4098	27.949	27.8335	28.2131	28.0773	28.0413	0.785693	0.0922667
P46777	P46777	Large ribosomal subunit protein uL18	RPL5	28.7605	28.9886	28.9349	28.8947	28.7133	28.8468	28.5573	28.7058	0.158899	-0.188867
P46778	P46778	Large ribosomal subunit protein eL21	RPL21	27.1432	27.2916	27.2034	27.2127	26.9568	27.3941	26.8524	27.0678	0.477543	-0.144967
P46779	P46779	Large ribosomal subunit protein eL28	RPL28	25.0839	25.4052	25.3918	25.2936	25.0648	25.6677	25.655	25.4625	0.506668	0.168867
P46781	P46781	Small ribosomal subunit protein uS4	RPS9	27.7857	28.7982	28.3824	28.3221	28.1949	28.2073	27.8578	28.0867	0.51716	-0.235433
P46782	P46782	Small ribosomal subunit protein uS7;Small ribosomal subunit protein uS7, N-terminally processed	RPS5	27.9156	26.5904	26.619	27.0417	25.7457	26.3348	27.2886	26.4564	0.403424	-0.5853
P46783;Q9NQ39	P46783	Small ribosomal subunit protein eS10	RPS10	26.6982	26.7894	26.5087	26.6654	26.3033	26.5687	26.457	26.443	0.120582	-0.222433
P46821;P78559	P46821	Microtubule-associated protein 1B;MAP1B heavy chain;MAP1 light chain LC1	MAP1B	17.1468	17.5678	17.6241	17.4462	17.588	17.1147	17.1908	17.2978	0.519285	-0.1484
P46940	P46940	Ras GTPase-activating-like protein IQGAP1	IQGAP1	25.2981	25.2107	25.1072	25.2053	25.1807	24.6679	25.0474	24.9653	0.254617	-0.24
P46977	P46977	Dolichyl-diphosphooligosaccharide--protein glycosyltransferase subunit STT3A	STT3A	22.4379	20.9557	21.1238	21.5058	20.688	19.6338	21.6548	20.6589	0.323765	-0.846933
P47755	P47755	F-actin-capping protein subunit alpha-2	CAPZA2	22.921	22.7288	22.4292	22.693	23.6477	23.091	22.6297	23.1228	0.283428	0.4298
P47756	P47756	F-actin-capping protein subunit beta	CAPZB	26.4112	26.8963	26.5795	26.629	26.723	26.4573	26.2747	26.485	0.496893	-0.144
P47813;O14602	P47813;O14602	Eukaryotic translation initiation factor 1A, X-chromosomal;Eukaryotic translation initiation factor 1A, Y-chromosomal	EIF1AX;EIF1AY	25.1664	25.697	25.265	25.3761	24.565	25.6241	25.2314	25.1402	0.547421	-0.235967
P47897	P47897	Glutamine--tRNA ligase	QARS1	23.772	23.9899	23.8778	23.8799	23.9837	23.5144	23.6893	23.7291	0.395317	-0.150767
P47914	P47914	Large ribosomal subunit protein eL29	RPL29	25.9613	24.7682	25.4362	25.3886	26.3348	27.17	26.2479	26.5842	0.0592726	1.19567
P47985;P0C7P4	P47985;P0C7P4	Cytochrome b-c1 complex subunit Rieske, mitochondrial;Cytochrome b-c1 complex subunit 9;Putative cytochrome b-c1 complex subunit Rieske-like protein 1	UQCRFS1;UQCRFS1P1	23.2968	23.9025	23.7289	23.6427	23.3989	23.9547	23.0574	23.4703	0.619407	-0.1724
P48047	P48047	ATP synthase subunit O, mitochondrial	ATP5PO	25.7736	25.7787	25.6983	25.7502	25.774	26.1915	25.638	25.8678	0.554503	0.117633
P48059;Q7Z4I7	P48059	LIM and senescent cell antigen-like-containing domain protein 1	LIMS1	19.6505	20.4376	19.9755	20.0212	21.6077	21.3916	20.5006	21.1666	0.056555	1.14543
P48060	P48060	Glioma pathogenesis-related protein 1	GLIPR1	20.6628	20.622	18.9945	20.0931	20.3584	19.7159	20.1803	20.0849	0.989769	-0.00823333
P48444	P48444	Coatomer subunit delta	ARCN1	23.6797	24.046	24.0245	23.9167	23.7658	23.9356	23.8669	23.8561	0.672904	-0.0606333
P48509	P48509	CD151 antigen	CD151	18.7579	23.3713	18.5507	20.2266	16.0734	18.9183	23.0854	19.359	0.753967	-0.8676
P48556	P48556	26S proteasome non-ATPase regulatory subunit 8	PSMD8	21.0888	21.2852	21.5988	21.3243	20.9088	21.7126	21.2373	21.2862	0.898391	-0.0380333
P48634	P48634	Protein PRRC2A	PRRC2A	17.8033	17.1005	17.9967	17.6335	17.086	16.511	16.7831	16.7934	0.0705015	-0.840133
P48643	P48643	T-complex protein 1 subunit epsilon	CCT5	26.2758	26.898	26.7542	26.6427	26.6114	26.7302	26.3009	26.5475	0.699905	-0.0951667
P48651	P48651	Phosphatidylserine synthase 1	PTDSS1	18.0776	14.943	16.0689	16.3632	17.1962	16.9509	15.7955	16.6475	0.798162	0.284367
P48723	P48723	Heat shock 70 kDa protein 13	HSPA13	20.4189	20.9296	20.2999	20.5495	21.2708	19.6857	20.357	20.4378	0.83868	-0.111633
P48729;Q8N752	P48729;Q8N752	Casein kinase I isoform alpha;Casein kinase I isoform alpha-like	CSNK1A1;CSNK1A1L	19.493	19.7046	19.8826	19.6934	20.1687	19.8395	19.2231	19.7438	0.878334	0.0503667
P48730;P49674	P48730;P49674	Casein kinase I isoform delta;Casein kinase I isoform epsilon	CSNK1D;CSNK1E	19.7965	16.5704	19.5187	18.6285	18.6109	19.9797	19.7909	19.4605	0.516663	0.831967
P48960;Q9UHX3	P48960	Adhesion G protein-coupled receptor E5;Adhesion G protein-coupled receptor E5 subunit alpha;Adhesion G protein-coupled receptor E5 subunit beta	ADGRE5	22.992	22.859	22.4441	22.765	22.7913	23.0548	22.7107	22.8523	0.681811	0.0872333
P49005	P49005	DNA polymerase delta subunit 2	POLD2	18.8092	19.4147	19.6261	19.2833	19.4077	19.3836	18.91	19.2338	0.875292	-0.0495667
P49207	P49207	Large ribosomal subunit protein eL34	RPL34	26.8781	26.0205	26.5491	26.4826	27.1038	27.245	27.1434	27.1641	0.10835	0.6815
P49257	P49257	Protein ERGIC-53	LMAN1	23.4012	21.7993	22.5439	22.5815	22.4515	21.8959	22.8371	22.3948	0.749714	-0.186633
P49321	P49321	Nuclear autoantigenic sperm protein	NASP	24.3478	24.8333	24.7132	24.6314	24.7393	24.7998	24.0518	24.5303	0.740561	-0.101133
P49327	P49327	Fatty acid synthase;[Acyl-carrier-protein] S-acetyltransferase;[Acyl-carrier-protein] S-malonyltransferase;3-oxoacyl-[acyl-carrier-protein] synthase;3-oxoacyl-[acyl-carrier-protein] reductase;3-hydroxyacyl-[acyl-carrier-protein] dehydratase;Enoyl-[acyl-carrier-protein] reductase;Acyl-[acyl-carrier-protein] hydrolase	FASN	22.0021	22.2021	22.667	22.2904	22.8492	22.5013	22.7248	22.6918	0.168007	0.401367
P49368	P49368	T-complex protein 1 subunit gamma	CCT3	25.9127	26.1869	26.1257	26.0751	26.0812	25.9451	26.1124	26.0462	0.785087	-0.0288667
P49406	P49406	Large ribosomal subunit protein bL19m	MRPL19	20.9568	21.3128	21.3396	21.2031	20.6902	20.8415	20.6468	20.7262	0.0427105	-0.4769
P49411	P49411	Elongation factor Tu, mitochondrial	TUFM	26.05	26.5826	26.4606	26.3644	26.2717	26.2012	26.0228	26.1652	0.348063	-0.199167
P49419	P49419	Alpha-aminoadipic semialdehyde dehydrogenase	ALDH7A1	21.2309	21.3683	21.894	21.4977	21.8469	21.517	21.1715	21.5118	0.962452	0.0140667
P49458	P49458	Signal recognition particle 9 kDa protein	SRP9	24.7717	26.1043	25.4764	25.4508	25.5541	25.8901	25.2917	25.5786	0.783232	0.127833
P49589	P49589	Cysteine--tRNA ligase, cytoplasmic	CARS1	17.0798	19.264	18.3209	18.2216	18.5395	18.8513	18.4103	18.6004	0.612782	0.3788
P49591	P49591	Serine--tRNA ligase, cytoplasmic	SARS1	17.6666	15.6743	17.9164	17.0858	17.2754	18.1701	17.6874	17.711	0.478677	0.6252
P49642	P49642	DNA primase small subunit	PRIM1	19.7007	19.986	20.3232	20.0033	20.2343	19.9081	19.5409	19.8944	0.70685	-0.108867
P49643	P49643	DNA primase large subunit	PRIM2	21.2969	20.9593	21.365	21.2071	20.7092	21.1559	21.274	21.0464	0.495979	-0.1607
P49711;Q8NI51	P49711	Transcriptional repressor CTCF	CTCF	17.2801	19.4177	20.6239	19.1072	18.1481	19.7255	17.6956	18.5231	0.644318	-0.584167
P49720	P49720	Proteasome subunit beta type-3	PSMB3	23.4271	24.5926	24.2684	24.096	24.5926	24.6552	23.4406	24.2295	0.812397	0.133433
P49721	P49721	Proteasome subunit beta type-2	PSMB2	21.7886	23.0558	22.8882	22.5775	21.4946	21.9911	22.5857	22.0238	0.339358	-0.553733
P49736	P49736	DNA replication licensing factor MCM2	MCM2	24.7812	25.2139	25.3041	25.0997	24.8572	25.1747	25.1561	25.0627	0.857447	-0.0370667
P49748	P49748	Very long-chain specific acyl-CoA dehydrogenase, mitochondrial	ACADVL	24.8675	25.3425	25.214	25.1413	25.5039	24.6209	24.5157	24.8802	0.506721	-0.261167
P49750	P49750	YLP motif-containing protein 1	YLPM1	22.0016	23.456	23.5335	22.997	23.4129	21.8926	21.0625	22.1227	0.366796	-0.874367
P49755	P49755	Transmembrane emp24 domain-containing protein 10	TMED10	23.7188	23.1241	22.7627	23.2019	22.1649	23.0552	23.8338	23.018	0.761667	-0.1839
P49756	P49756	RNA-binding protein 25	RBM25	22.8219	23.1293	23.235	23.0621	23.2268	23.3028	23.0283	23.186	0.457662	0.1239
P49757	P49757	Protein numb homolog	NUMB	19.6159	18.7043	20.9109	19.7437	19.7794	20.9212	19.6526	20.1177	0.651525	0.374033
P49770	P49770	Translation initiation factor eIF2B subunit beta	EIF2B2	23.7706	23.8405	23.5831	23.7314	23.8398	23.3328	23.0813	23.418	0.293486	-0.313433
P49790	P49790	Nuclear pore complex protein Nup153	NUP153	20.6838	21.1294	21.0871	20.9668	21.363	20.9193	21.1591	21.1471	0.399732	0.180367
P49792	P49792	E3 SUMO-protein ligase RanBP2	RANBP2	18.6509	17.3693	18.0827	18.0343	18.4808	18.7932	18.8128	18.6956	0.210616	0.6613
P49821	P49821	NADH dehydrogenase [ubiquinone] flavoprotein 1, mitochondrial	NDUFV1	19.6893	19.3557	20.3727	19.8059	19.9579	20.5021	20.4982	20.3194	0.230561	0.5135
P49841	P49841	Glycogen synthase kinase-3 beta	GSK3B	19.2009	19.0979	19.6861	19.3283	19.963	16.5235	19.1384	18.5416	0.528806	-0.786667
P49848	P49848	Transcription initiation factor TFIID subunit 6	TAF6	18.8486	16.719	16.6374	17.4017	18.5321	17.6561	17.5639	17.9174	0.563659	0.5157
P49902	P49902	Cytosolic purine 5-nucleotidase	NT5C2	19.7294	20.1026	20.1153	19.9824	19.8499	19.9569	19.8609	19.8892	0.542539	-0.0932
P49903	P49903	Selenide, water dikinase 1	SEPHS1	19.7555	20.4317	20.3328	20.1733	20.8779	20.7168	19.9597	20.5181	0.388142	0.3448
P49915	P49915	GMP synthase [glutamine-hydrolyzing]	GMPS	22.1578	22.7607	22.9472	22.6219	22.9263	22.9151	22.0994	22.6469	0.948377	0.0250333
P49916	P49916	DNA ligase 3	LIG3	20.1115	19.6511	19.0138	19.5921	19.9145	19.9577	19.7706	19.8809	0.46103	0.2888
P49959	P49959	Double-strand break repair protein MRE11	MRE11	20.9313	21.6731	22.2475	21.6173	21.5687	21.6478	21.3725	21.5297	0.841373	-0.0876333
P50213	P50213	Isocitrate dehydrogenase [NAD] subunit alpha, mitochondrial	IDH3A	25.1418	25.5229	25.2966	25.3204	25.2495	25.0959	24.9598	25.1017	0.195273	-0.2187
P50281	P50281	Matrix metalloproteinase-14	MMP14	21.2446	18.889	20.6857	20.2731	19.5353	20.6848	21.5838	20.6013	0.741305	0.3282
P50402	P50402	Emerin	EMD	22.6425	19.112	21.1092	20.9546	21.9424	21.2033	22.8382	21.9946	0.42778	1.04007
P50454	P50454	Serpin H1	SERPINH1	24.6253	25.4654	25.2509	25.1139	25.5534	25.3119	24.2143	25.0265	0.867023	-0.0873333
P50479	P50479	PDZ and LIM domain protein 4	PDLIM4	24.7399	25.3292	25.028	25.0324	25.4096	25.2849	24.5881	25.0942	0.851605	0.0618333
P50502;Q8IZP2;Q8NFI4	P50502;Q8IZP2;Q8NFI4	Hsc70-interacting protein;Putative protein FAM10A4;Putative protein FAM10A5	ST13;ST13P4;ST13P5	23.8159	24.118	24.3017	24.0785	25.0591	24.6929	24.0513	24.6011	0.211918	0.522567
P50552	P50552	Vasodilator-stimulated phosphoprotein	VASP	19.97	21.1168	19.7683	20.285	20.6547	21.5359	20.5377	20.9094	0.304805	0.6244
P50570;Q05193;Q9UQ16	P50570	Dynamin-2	DNM2	19.5116	18.0001	17.2759	18.2625	19.3791	19.9679	19.5037	19.6169	0.169043	1.35437
P50579	P50579	Methionine aminopeptidase 2	METAP2	21.9897	18.964	18.7389	19.8975	19.2384	18.95	21.4702	19.8862	0.993571	-0.0113333
P50750	P50750	Cyclin-dependent kinase 9	CDK9	20.2892	19.6882	19.6243	19.8672	20.1399	19.8224	19.5458	19.836	0.91462	-0.0312
P50895	P50895	Basal cell adhesion molecule	BCAM	22.0119	21.3366	21.4996	21.616	21.5458	21.1575	21.708	21.4704	0.607861	-0.1456
P50914	P50914	Large ribosomal subunit protein eL14	RPL14	27.7047	27.4986	27.536	27.5798	27.0904	27.3331	27.2938	27.2391	0.0269288	-0.340667
P50990	P50990	T-complex protein 1 subunit theta	CCT8	26.957	27.491	27.2576	27.2352	27.3936	27.0271	26.8868	27.1025	0.572449	-0.1327
P50991	P50991	T-complex protein 1 subunit delta	CCT4	25.4328	25.8468	25.9277	25.7358	25.6138	26.0179	25.6096	25.7471	0.958504	0.0113333
P50995;P27216	P50995	Annexin A11	ANXA11	25.2144	25.7853	25.518	25.5059	25.4031	24.7237	24.8286	24.9851	0.128016	-0.520767
P51114	P51114	RNA-binding protein FXR1	FXR1	24.2126	24.9195	24.7075	24.6132	24.5933	24.1621	24.2548	24.3367	0.33673	-0.276467
P51116	P51116	RNA-binding protein FXR2	FXR2	18.7294	20.9249	19.1527	19.6023	19.1921	19.2204	18.7143	19.0423	0.495498	-0.560067
P51148	P51148	Ras-related protein Rab-5C	RAB5C	24.859	24.0339	24.6041	24.499	24.4555	23.7821	24.5936	24.2771	0.560236	-0.221933
P51149	P51149	Ras-related protein Rab-7a	RAB7A	26.4575	25.7733	26.1009	26.1106	25.8589	25.527	26.3656	25.9172	0.572411	-0.1934
P51398	P51398	Small ribosomal subunit protein mS29	DAP3	19.65	16.2886	20.649	18.8625	20.3174	20.7483	19.501	20.1889	0.422875	1.32637
P51532	P51532	Transcription activator BRG1	SMARCA4	18.6604	18.9547	20.0798	19.2316	19.3754	20.7481	21.2769	20.4668	0.163141	1.23517
P51553	P51553	Isocitrate dehydrogenase [NAD] subunit gamma, mitochondrial	IDH3G	25.4973	25.698	25.527	25.5741	25.6002	20.7795	23.5943	23.3247	0.248755	-2.24943
P51571	P51571	Translocon-associated protein subunit delta	SSR4	25.4163	25.6889	25.7651	25.6234	25.4882	25.4394	25.4667	25.4648	0.271654	-0.158667
P51572	P51572	B-cell receptor-associated protein 31	BCAP31	25.6607	25.6133	25.5054	25.5931	25.3858	25.1985	25.5694	25.3846	0.18103	-0.208567
P51608	P51608	Methyl-CpG-binding protein 2	MECP2	17.3708	16.8722	18.4253	17.5561	18.4483	17.3545	18.9582	18.2537	0.349122	0.697567
P51610	P51610	Host cell factor 1;HCF N-terminal chain 1;HCF N-terminal chain 2;HCF N-terminal chain 3;HCF N-terminal chain 4;HCF N-terminal chain 5;HCF N-terminal chain 6;HCF C-terminal chain 1;HCF C-terminal chain 2;HCF C-terminal chain 3;HCF C-terminal chain 4;HCF C-terminal chain 5;HCF C-terminal chain 6	HCFC1	21.6458	21.0748	21.5749	21.4318	20.9219	21.7824	21.4454	21.3832	0.883063	-0.0486
P51648;P30838;P43353;P48448	P51648	Aldehyde dehydrogenase family 3 member A2	ALDH3A2	21.5072	18.9112	21.1402	20.5195	20.3083	19.6689	21.0465	20.3412	0.856534	-0.1783
P51649	P51649	Succinate-semialdehyde dehydrogenase, mitochondrial	ALDH5A1	17.5243	17.618	18.022	17.7214	17.7904	17.5592	17.5324	17.6273	0.62412	-0.0941
P51659	P51659	Peroxisomal multifunctional enzyme type 2;(3R)-hydroxyacyl-CoA dehydrogenase;Enoyl-CoA hydratase 2	HSD17B4	22.3896	22.7441	22.862	22.6652	22.7454	22.5087	22.5522	22.6021	0.718866	-0.0631333
P51665	P51665	26S proteasome non-ATPase regulatory subunit 7	PSMD7	22.0714	22.7121	22.1075	22.297	22.4269	23.2318	22.273	22.6439	0.398936	0.3469
P51784;Q13107	P51784	Ubiquitin carboxyl-terminal hydrolase 11	USP11	17.4959	17.9377	17.7021	17.7119	18.1047	18.3173	18.0305	18.1508	0.0540727	0.438933
P51809	P51809	Vesicle-associated membrane protein 7	VAMP7	19.3674	19.6931	19.0338	19.3648	20.0196	19.4512	19.2439	19.5716	0.529846	0.2068
P51970	P51970	NADH dehydrogenase [ubiquinone] 1 alpha subcomplex subunit 8	NDUFA8	23.0319	23.4878	23.3253	23.2817	23.0647	23.2799	22.7987	23.0478	0.291871	-0.2339
P51991	P51991	Heterogeneous nuclear ribonucleoprotein A3	HNRNPA3	26.2049	26.9705	25.9489	26.3748	26.7228	27.2951	26.8605	26.9595	0.191007	0.5847
P52209	P52209	6-phosphogluconate dehydrogenase, decarboxylating	PGD	20.0628	20.1827	20.0544	20.1	20.0417	19.7913	19.5523	19.7951	0.155331	-0.304867
P52272	P52272	Heterogeneous nuclear ribonucleoprotein M	HNRNPM	27.0859	27.4967	27.5898	27.3908	27.6778	27.7037	27.2603	27.5473	0.500138	0.156467
P52292	P52292	Importin subunit alpha-1	KPNA2	23.2743	23.9224	24.3735	23.8567	24.4327	24.3036	24.1495	24.2953	0.30129	0.438533
P52294	P52294	Importin subunit alpha-5;Importin subunit alpha-5, N-terminally processed	KPNA1	18.2835	16.6637	16.1901	17.0458	17.5649	17.7719	16.9119	17.4162	0.630593	0.370467
P52298	P52298	Nuclear cap-binding protein subunit 2	NCBP2	22.6029	23.1777	22.9531	22.9112	23.0538	23.02	22.1364	22.7367	0.645315	-0.1745
P52434	P52434	DNA-directed RNA polymerases I, II, and III subunit RPABC3	POLR2H	19.5668	21.7235	22.7606	21.3503	22.5885	21.4725	21.1937	21.7516	0.725353	0.401267
P52435;Q9GZM3;Q9H1A7	P52435;Q9GZM3;Q9H1A7	DNA-directed RNA polymerase II subunit RPB11-a;DNA-directed RNA polymerase II subunit RPB11-b1;DNA-directed RNA polymerase II subunit RPB11-b2	POLR2J;POLR2J2;POLR2J3	20.1451	16.0219	16.792	17.653	20.7	21.5831	21.011	21.098	0.10719	3.44503
P52565	P52565	Rho GDP-dissociation inhibitor 1	ARHGDIA	21.6269	22.0611	22.1001	21.9294	21.7854	21.585	20.975	21.4485	0.182916	-0.4809
P52597	P52597	Heterogeneous nuclear ribonucleoprotein F;Heterogeneous nuclear ribonucleoprotein F, N-terminally processed	HNRNPF	27.4638	28.1428	27.8773	27.828	28.1087	28.0802	27.0201	27.7363	0.836655	-0.0916333
P52701	P52701	DNA mismatch repair protein Msh6	MSH6	22.984	23.6235	23.609	23.4055	23.3479	23.2524	23.1794	23.2599	0.564406	-0.1456
P52732	P52732	Kinesin-like protein KIF11	KIF11	17.4533	15.1187	16.0989	16.2236	18.2494	16.0436	15.6782	16.6571	0.701576	0.433433
P52747	P52747	Zinc finger protein 143	ZNF143	15.8832	17.2788	15.9012	16.3544	16.077	17.6491	15.536	16.4207	0.937061	0.0663
P52756	P52756	RNA-binding protein 5	RBM5	16.5741	18.5149	17.1573	17.4154	18.5096	19.6775	18.2789	18.822	0.127738	1.40657
P52789	P52789	Hexokinase-2	HK2	16.1887	18.825	17.0658	17.3598	19.1641	17.9675	18.3144	18.482	0.285374	1.12217
P52815	P52815	Large ribosomal subunit protein bL12m	MRPL12	23.6804	24.1268	24.5814	24.1295	24.1045	25.4974	24.8994	24.8338	0.227826	0.704233
P52907	P52907	F-actin-capping protein subunit alpha-1	CAPZA1	25.927	26.4939	26.3477	26.2562	26.5224	26.3811	25.9472	26.2836	0.915599	0.0273667
P52948	P52948	Nuclear pore complex protein Nup98-Nup96;Nuclear pore complex protein Nup98;Nuclear pore complex protein Nup96	NUP98	21.831	22.5376	23.4269	22.5985	23.3466	23.3161	22.3717	23.0115	0.507712	0.412967
P53007	P53007	Tricarboxylate transport protein, mitochondrial	SLC25A1	22.4029	18.0855	18.5527	19.6804	16.3437	15.72	21.1333	17.7323	0.426209	-1.94803
P53396	P53396	ATP-citrate synthase	ACLY	21.775	21.6025	21.8203	21.7326	21.4262	22.3071	22.0293	21.9209	0.548201	0.188267
P53582	P53582	Methionine aminopeptidase 1	METAP1	23.2313	23.8583	23.6123	23.5673	23.6905	23.9217	22.9855	23.5326	0.923306	-0.0347333
P53597	P53597	Succinate--CoA ligase [ADP/GDP-forming] subunit alpha, mitochondrial	SUCLG1	22.0042	23.5336	22.4024	22.6467	20.0132	22.27	21.0223	21.1018	0.132921	-1.5449
P53618	P53618	Coatomer subunit beta	COPB1	23.4465	24.198	23.8257	23.8234	23.4249	23.4099	23.5471	23.4606	0.233533	-0.362767
P53621	P53621	Coatomer subunit alpha;Xenin;Proxenin	COPA	23.371	22.9711	23.1761	23.1727	22.883	22.779	22.959	22.8737	0.106085	-0.299067
P53675	P53675	Clathrin heavy chain 2	CLTCL1	16.5341	17.1867	17.2349	16.9852	16.9274	18.1487	17.2668	17.4476	0.352103	0.4624
P53680	P53680	AP-2 complex subunit sigma	AP2S1	22.2897	23.3112	22.3047	22.6352	22.6254	22.9004	22.6341	22.72	0.828617	0.0847667
P53801	P53801	Pituitary tumor-transforming gene 1 protein-interacting protein	PTTG1IP	17.5363	17.0775	16.4756	17.0298	17.3857	17.2305	16.3664	16.9942	0.939601	-0.0356
P53814	P53814	Smoothelin	SMTN	19.156	19.5641	19.6766	19.4656	19.5334	20.5867	20.1073	20.0758	0.173174	0.610233
P53985	P53985	Monocarboxylate transporter 1	SLC16A1	22.9049	22.1492	21.9264	22.3268	22.1939	22.9625	20.3022	21.8195	0.596988	-0.5073
P53992	P53992	Protein transport protein Sec24C	SEC24C	18.3169	19.7222	19.7158	19.2516	20.224	20.1266	19.9988	20.1165	0.203551	0.864833
P53999	P53999	Activated RNA polymerase II transcriptional coactivator p15	SUB1	27.3472	27.8112	27.5584	27.5723	27.6681	28.0156	26.7408	27.4748	0.827641	-0.0974333
P54105	P54105	Methylosome subunit pICln	CLNS1A	20.5655	16.9048	16.7354	18.0686	20.7772	20.8148	19.8025	20.4648	0.18913	2.39627
P54136	P54136	Arginine--tRNA ligase, cytoplasmic	RARS1	24.7942	24.8929	25.0341	24.9071	25.0141	24.9442	24.8263	24.9282	0.8238	0.0211333
P54289	P54289	Voltage-dependent calcium channel subunit alpha-2/delta-1;Voltage-dependent calcium channel subunit alpha-2-1;Voltage-dependent calcium channel subunit delta-1	CACNA2D1	21.5139	20.9684	20.1885	20.8903	19.9537	20.0876	20.3872	20.1428	0.183211	-0.747433
P54577	P54577	Tyrosine--tRNA ligase, cytoplasmic;Tyrosine--tRNA ligase, cytoplasmic, N-terminally processed	YARS1	18.8914	19.7119	20.322	19.6418	20.8365	20.4471	20.7546	20.6794	0.120142	1.03763
P54578	P54578	Ubiquitin carboxyl-terminal hydrolase 14	USP14	20.2356	20.9542	20.0633	20.4177	21.1643	20.9793	20.1124	20.752	0.475491	0.3343
P54619;Q9UGJ0	P54619	5-AMP-activated protein kinase subunit gamma-1	PRKAG1	20.981	22.1583	21.9874	21.7089	22.139	21.6505	21.3134	21.701	0.986566	-0.00793333
P54709	P54709	Sodium/potassium-transporting ATPase subunit beta-3	ATP1B3	23.3948	23.366	24.0623	23.6077	24.1242	23.1089	24.2496	23.8276	0.638357	0.219867
P54725	P54725	UV excision repair protein RAD23 homolog A	RAD23A	24.6614	24.7591	24.7566	24.7257	24.7597	24.6491	24.2446	24.5511	0.381115	-0.174567
P54727	P54727	UV excision repair protein RAD23 homolog B	RAD23B	23.5288	23.9004	24.1364	23.8552	23.9069	24.4259	23.4718	23.9349	0.821792	0.0796667
P54819	P54819	Adenylate kinase 2, mitochondrial;Adenylate kinase 2, mitochondrial, N-terminally processed	AK2	21.575	22.3623	21.6554	21.8642	21.7944	22.4446	21.6935	21.9775	0.758156	0.113267
P54886	P54886	Delta-1-pyrroline-5-carboxylate synthase;Glutamate 5-kinase;Gamma-glutamyl phosphate reductase	ALDH18A1	23.1653	23.0875	23.1818	23.1449	22.9079	23.1673	23.5421	23.2058	0.773556	0.0609
P54920;Q9H115	P54920	Alpha-soluble NSF attachment protein	NAPA	24.9284	25.2687	25.1854	25.1275	25.1898	24.92	24.6673	24.9257	0.338241	-0.2018
P55010	P55010	Eukaryotic translation initiation factor 5	EIF5	22.9374	22.7465	23.4903	23.0581	23.0978	23.4244	23.0336	23.1853	0.649767	0.1272
P55011	P55011	Solute carrier family 12 member 2	SLC12A2	20.4755	19.7127	19.6146	19.9343	20.1636	19.4023	20.0063	19.8574	0.840568	-0.0768667
P55036	P55036	26S proteasome non-ATPase regulatory subunit 4	PSMD4	22.2055	23.0671	23.2097	22.8274	23.2268	23.368	22.8247	23.1398	0.441713	0.3124
P55060	P55060	Exportin-2	CSE1L	20.4074	20.043	19.4164	19.9556	18.4012	20.0003	20.0817	19.4944	0.509625	-0.4612
P55072	P55072	Transitional endoplasmic reticulum ATPase	VCP	27.3009	27.9808	27.8397	27.7071	28.15	28.0559	27.5288	27.9116	0.510693	0.204433
P55081	P55081	Microfibrillar-associated protein 1	MFAP1	21.8445	22.0378	21.8088	21.897	22.3522	22.9459	21.9709	22.423	0.199683	0.525967
P55084	P55084	Trifunctional enzyme subunit beta, mitochondrial;3-ketoacyl-CoA thiolase	HADHB	25.4563	25.4161	25.5239	25.4654	25.654	25.4101	25.3238	25.4626	0.980551	-0.0028
P55196	P55196	Afadin	AFDN	17.6151	17.8045	17.7689	17.7295	17.6764	17.3678	16.6604	17.2349	0.239108	-0.494633
P55209	P55209	Nucleosome assembly protein 1-like 1	NAP1L1	24.9688	25.8915	26.4813	25.7805	26.4974	26.2179	25.0101	25.9085	0.849948	0.127933
P55265	P55265	Double-stranded RNA-specific adenosine deaminase	ADAR	22.0675	22.1982	21.8425	22.0361	21.6382	22.3629	22.2874	22.0962	0.828224	0.0601
P55290	P55290	Cadherin-13	CDH13	20.4762	19.8383	19.5802	19.9649	19.1112	19.2034	19.4899	19.2682	0.104646	-0.696733
P55735	P55735	Protein SEC13 homolog	SEC13	24.8616	25.4464	24.9713	25.0931	25.2142	24.9425	24.4336	24.8634	0.476143	-0.229667
P55769	P55769	NHP2-like protein 1;NHP2-like protein 1, N-terminally processed	SNU13	25.3515	24.6464	25.3157	25.1045	25.6632	26.1239	25.6538	25.8136	0.0710293	0.7091
P55795	P55795	Heterogeneous nuclear ribonucleoprotein H2;Heterogeneous nuclear ribonucleoprotein H2, N-terminally processed	HNRNPH2	24.6607	25.0898	24.3498	24.7001	25.0532	25.0403	24.7991	24.9642	0.345904	0.2641
P55809;Q9BYC2	P55809	Succinyl-CoA:3-ketoacid coenzyme A transferase 1, mitochondrial	OXCT1	21.0669	19.9235	19.8706	20.287	19.6689	20.7172	20.8449	20.4103	0.830416	0.123333
P61956;P55854;Q6EEV6	P61956;P55854;Q6EEV6	Small ubiquitin-related modifier 2;Small ubiquitin-related modifier 3;Small ubiquitin-related modifier 4	SUMO2;SUMO3;SUMO4	25.4877	25.8909	25.757	25.7119	25.8256	26.0746	25.5952	25.8318	0.547258	0.119933
P55884	P55884	Eukaryotic translation initiation factor 3 subunit B	EIF3B	25.3926	25.9552	25.8043	25.7174	25.5851	25.3745	25.1315	25.3637	0.176667	-0.353667
P56134	P56134	ATP synthase subunit f, mitochondrial	ATP5MF	24.3327	21.7659	21.4518	22.5168	21.7992	17.9808	23.4395	21.0732	0.490962	-1.44363
P56182	P56182	Ribosomal RNA processing protein 1 homolog A	RRP1	22.0955	22.9122	22.8767	22.6281	22.7133	22.8215	22.6432	22.726	0.750855	0.0978667
P56192	P56192	Methionine--tRNA ligase, cytoplasmic	MARS1	24.3607	24.6294	24.4147	24.4683	24.3156	24.1878	24.3135	24.2723	0.124089	-0.195967
P56377	P56377	AP-1 complex subunit sigma-2	AP1S2	19.9228	17.5812	19.0345	18.8462	16.5873	16.4245	19.6507	17.5542	0.369109	-1.292
P56385	P56385	ATP synthase subunit e, mitochondrial;ATP synthase subunit e, mitochondrial, N-terminally processed	ATP5ME	23.9176	23.0312	22.9146	23.2878	23.0961	23.115	23.2143	23.1418	0.690889	-0.146
P56537	P56537	Eukaryotic translation initiation factor 6	EIF6	26.7113	27.4857	26.8287	27.0086	26.7423	27.1495	26.431	26.7743	0.503368	-0.2343
P56545	P56545	C-terminal-binding protein 2	CTBP2	21.8583	22.9647	22.8643	22.5624	22.5759	22.5674	22.2802	22.4745	0.830049	-0.0879333
P56589	P56589	Peroxisomal biogenesis factor 3	PEX3	19.07	17.8973	15.0649	17.3441	18.1467	17.5801	18.493	18.0733	0.605319	0.7292
P57088	P57088	Transmembrane protein 33	TMEM33	23.9614	21.5009	22.544	22.6688	22.4709	22.1073	23.5925	22.7236	0.951762	0.0548
P57105	P57105	Synaptojanin-2-binding protein	SYNJ2BP	20.04	16.4274	16.9013	17.7896	18.151	17.0506	19.7594	18.3203	0.722293	0.530767
P57678	P57678	Gem-associated protein 4	GEMIN4	18.2984	18.0044	17.8354	18.0461	17.8899	17.2998	18.1509	17.7802	0.419487	-0.265867
P57740	P57740	Nuclear pore complex protein Nup107	NUP107	21.8915	22.4804	22.3665	22.2461	22.7996	22.405	22.027	22.4105	0.598487	0.1644
Q99880;Q93079;Q99877;P62807;P58876;Q5QNW6;Q99879	Q99880;Q93079;Q99877;P62807;P58876;Q5QNW6;Q99879	Histone H2B type 1-L;Histone H2B type 1-H;Histone H2B type 1-N;Histone H2B type 1-C/E/F/G/I;Histone H2B type 1-D;Histone H2B type 2-F;Histone H2B type 1-M	H2BC13;H2BC9;H2BC15;H2BC4;H2BC5;H2BC18;H2BC14	32.0981	32.468	32.2938	32.2866	32.6592	32.5052	32.0906	32.4183	0.553596	0.1317
P59998	P59998	Actin-related protein 2/3 complex subunit 4	ARPC4	22.9725	23.0882	23.1512	23.0706	22.7249	23.4223	23.0324	23.0599	0.963005	-0.0107667
P60033	P60033	CD81 antigen	CD81	23.6211	23.9469	15.9479	21.172	22.8096	23.2591	23.0332	23.034	0.550244	1.862
P60059	P60059	Protein transport protein Sec61 subunit gamma	SEC61G	21.4019	21.7717	17.4568	20.2101	18.2709	15.6889	17.315	17.0916	0.138919	-3.11853
P60174	P60174	Triosephosphate isomerase	TPI1	23.9882	24.6823	24.3577	24.3427	23.6597	23.7718	23.4003	23.6106	0.0469946	-0.732133
P60228	P60228	Eukaryotic translation initiation factor 3 subunit E	EIF3E	24.5972	25.0228	24.9735	24.8645	24.4851	24.7292	24.5378	24.584	0.161763	-0.280467
P60468	P60468	Protein transport protein Sec61 subunit beta	SEC61B	15.9089	17.6308	19.2377	17.5925	20.7876	16.5563	17.1553	18.1664	0.74478	0.573933
P60510	P60510	Serine/threonine-protein phosphatase 4 catalytic subunit	PPP4C	23.5187	24.1875	23.2808	23.6623	23.7241	23.8327	23.0797	23.5455	0.761485	-0.116833
P60604	P60604	Ubiquitin-conjugating enzyme E2 G2	UBE2G2	23.8882	16.9208	22.8938	21.2343	22.9229	24.0149	23.6291	23.5223	0.403517	2.28803
P60660	P60660	Myosin light polypeptide 6	MYL6	27.9845	27.9889	27.5259	27.8331	28.0685	28.7915	28.2602	28.3734	0.11891	0.5403
P60709	P60709	Actin, cytoplasmic 1;Actin, cytoplasmic 1, N-terminally processed	ACTB	28.581	29.0362	28.8498	28.8223	29.2238	28.6804	28.2061	28.7034	0.738538	-0.1189
P60842	P60842	Eukaryotic initiation factor 4A-I	EIF4A1	26.4206	26.8151	26.5878	26.6078	26.8018	26.5641	26.4386	26.6015	0.969618	-0.00633333
P60866	P60866	Small ribosomal subunit protein uS10	RPS20	26.7502	26.9844	25.9908	26.5751	26.04	26.311	26.6248	26.3253	0.518047	-0.249867
P60891	P60891	Ribose-phosphate pyrophosphokinase 1	PRPS1	23.8643	24.288	24.0985	24.0836	24.5904	23.8062	23.698	24.0315	0.876976	-0.0520667
P60900	P60900	Proteasome subunit alpha type-6	PSMA6	25.4591	26.1745	25.5035	25.7124	25.7243	26.1448	25.3147	25.7279	0.964973	0.0155667
P60903	P60903	Protein S100-A10	S100A10	26.1467	25.8008	25.1858	25.7111	25.0837	25.7989	26.3971	25.7599	0.923084	0.0488
P60953	P60953	Cell division control protein 42 homolog	CDC42	24.4654	24.005	23.6241	24.0315	23.4618	23.8212	24.4744	23.9191	0.784568	-0.112367
P61006	P61006	Ras-related protein Rab-8A	RAB8A	20.9414	19.4649	16.1979	18.8681	19.732	19.9094	19.9567	19.866	0.550395	0.997967
P61009	P61009	Signal peptidase complex subunit 3	SPCS3	24.7496	24.2547	24.3153	24.4399	23.8308	23.5206	24.3197	23.8904	0.131378	-0.5495
P61011	P61011	Signal recognition particle subunit SRP54	SRP54	20.3294	21.9313	20.4242	20.895	18.7633	21.6177	20.8445	20.4085	0.656442	-0.486467
P61019	P61019	Ras-related protein Rab-2A	RAB2A	24.2049	22.3972	22.6797	23.0939	22.7457	23.6462	24.2078	23.5332	0.569101	0.4393
P61020	P61020	Ras-related protein Rab-5B	RAB5B	15.3888	17.957	17.5974	16.9811	16.605	19.4739	21.4064	19.1618	0.263288	2.1807
P61026;P51153	P61026	Ras-related protein Rab-10	RAB10	24.1472	23.419	23.4671	23.6778	23.3818	23.7319	24.2372	23.7836	0.772368	0.105867
P61106	P61106	Ras-related protein Rab-14	RAB14	24.8464	24.2132	23.7931	24.2842	24.0752	23.9667	24.7703	24.2707	0.974518	-0.0135
P61158;Q9P1U1	P61158	Actin-related protein 3	ACTR3	24.9919	25.2885	25.0133	25.0979	25.2285	24.9498	24.7905	24.9896	0.537701	-0.1083
P61160	P61160	Actin-related protein 2	ACTR2	24.0204	24.7119	24.2595	24.3306	24.4556	24.0957	23.9941	24.1818	0.582318	-0.1488
P61163	P61163	Alpha-centractin	ACTR1A	22.4656	22.9198	22.6367	22.674	22.5158	22.6597	22.5661	22.5805	0.560092	-0.0935
P61165	P61165	Transmembrane protein 258	TMEM258	16.2094	18.5106	17.4343	17.3848	17.5278	16.7567	21.6809	18.6551	0.506523	1.27037
P61201	P61201	COP9 signalosome complex subunit 2	COPS2	18.9908	19.4808	19.4594	19.3103	19.5849	19.2303	18.6395	19.1516	0.650567	-0.158767
P61221	P61221	ATP-binding cassette sub-family E member 1	ABCE1	23.3171	23.2549	23.7605	23.4442	23.6088	23.3936	23.2211	23.4078	0.862033	-0.0363333
P61224;A6NIZ1	P61224;A6NIZ1	Ras-related protein Rap-1b;Ras-related protein Rap-1b-like protein	RAP1B;RAP1BL	24.175	23.993	24.0478	24.0719	23.941	23.6689	24.4955	24.0351	0.895027	-0.0368
P61225;P10114	P61225;P10114	Ras-related protein Rap-2b;Ras-related protein Rap-2a	RAP2B;RAP2A	23.6712	23.5771	23.696	23.6481	23.2038	23.3848	23.5583	23.3823	0.109131	-0.2658
P61247	P61247	Small ribosomal subunit protein eS1	RPS3A	28.4454	28.7272	28.5216	28.5647	28.3065	28.1515	28.1222	28.1934	0.0270996	-0.371333
P61254	P61254	Large ribosomal subunit protein uL24	RPL26	27.8424	28.3004	28.0221	28.055	27.733	27.837	27.4448	27.6716	0.0980255	-0.383367
P61289	P61289	Proteasome activator complex subunit 3	PSME3	23.5421	24.9987	24.4157	24.3188	24.7602	24.8566	24.6378	24.7515	0.414503	0.4327
P61313	P61313	Large ribosomal subunit protein eL15	RPL15	26.5457	26.2022	25.91	26.2193	25.7011	26.2415	26.2965	26.0797	0.6253	-0.1396
P61353	P61353	Large ribosomal subunit protein eL27	RPL27	27.601	28.1994	27.8326	27.8777	27.768	27.9446	27.4618	27.7248	0.5342	-0.152867
P61421	P61421	V-type proton ATPase subunit d 1	ATP6V0D1	23.3996	23.943	23.5685	23.637	23.5409	23.4918	23.6474	23.56	0.684348	-0.077
P61513;A6NKH3	P61513	Large ribosomal subunit protein eL43	RPL37A	26.0131	25.9943	24.8784	25.6286	23.8699	25.8738	25.3561	25.0333	0.456217	-0.595333
P61586	P61586	Transforming protein RhoA	RHOA	25.0269	23.6605	24.2834	24.3236	22.7107	23.968	24.5195	23.7327	0.428634	-0.590867
P61604	P61604	10 kDa heat shock protein, mitochondrial	HSPE1	27.0291	26.8787	26.6882	26.8653	27.021	26.8143	26.783	26.8728	0.95517	0.00743333
P61619;Q9H9S3	P61619	Protein transport protein Sec61 subunit alpha isoform 1	SEC61A1	23.405	21.2716	21.0585	21.9117	21.5762	20.748	22.647	21.6571	0.798784	-0.254633
P61626	P61626	Lysozyme C	LYZ	22.8238	24.5793	24.7632	24.0554	24.5334	22.8839	22.7302	23.3825	0.470932	-0.672933
P61769	P61769	Beta-2-microglobulin;Beta-2-microglobulin form pI 5.3	B2M	24.1752	21.1842	25.2322	23.5305	20.7249	24.3639	24.1986	23.0958	0.810365	-0.434733
P61803	P61803	Dolichyl-diphosphooligosaccharide--protein glycosyltransferase subunit DAD1	DAD1	24.2225	23.4768	23.8425	23.8473	22.0683	22.8858	24.2185	23.0575	0.335319	-0.789733
P61923	P61923	Coatomer subunit zeta-1	COPZ1	24.8212	25.4473	24.8431	25.0372	25.041	24.9111	24.4157	24.7893	0.426122	-0.247933
P61962	P61962	DDB1- and CUL4-associated factor 7	DCAF7	21.0543	21.4665	21.2113	21.244	21.5403	21.2124	20.3216	21.0248	0.615919	-0.219267
P61964	P61964	WD repeat-containing protein 5	WDR5	22.4477	23.5516	22.3879	22.7957	22.7974	22.1936	22.7771	22.5894	0.661769	-0.206367
P61966	P61966	AP-1 complex subunit sigma-1A	AP1S1	21.0439	21.2892	21.0332	21.1221	20.7395	21.3446	20.9851	21.0231	0.64742	-0.0990333
P61978	P61978	Heterogeneous nuclear ribonucleoprotein K	HNRNPK	28.2521	28.9927	28.9578	28.7342	29.0656	29.0095	28.4	28.825	0.792019	0.0908333
P61981	P61981	14-3-3 protein gamma;14-3-3 protein gamma, N-terminally processed	YWHAG	25.2058	25.8636	25.6096	25.5597	25.8411	25.7234	25.0466	25.537	0.946033	-0.0226333
P62070	P62070	Ras-related protein R-Ras2	RRAS2	20.9906	21.657	20.5819	21.0765	21.477	20.9189	21.6023	21.3327	0.539245	0.256233
P62072	P62072	Mitochondrial import inner membrane translocase subunit Tim10	TIMM10	21.1378	23.6916	18.0317	20.9537	20.5371	21.7224	21.2699	21.1765	0.905342	0.222767
P62081	P62081	Small ribosomal subunit protein eS7	RPS7	26.9083	27.6694	27.352	27.3099	27.2936	27.4371	26.9811	27.2373	0.795425	-0.0726333
P62136	P62136	Serine/threonine-protein phosphatase PP1-alpha catalytic subunit	PPP1CA	25.9066	26.3174	25.7652	25.9964	26.1114	25.9114	26.0003	26.0077	0.953466	0.0113
P62140	P62140	Serine/threonine-protein phosphatase PP1-beta catalytic subunit	PPP1CB	22.345	22.9395	21.6836	22.3227	22.5715	22.9524	22.9316	22.8185	0.303887	0.4958
P62191	P62191	26S proteasome regulatory subunit 4	PSMC1	21.3742	21.9411	22.3468	21.8874	22.3218	22.7997	22.5245	22.5487	0.128764	0.6613
P62195	P62195	26S proteasome regulatory subunit 8	PSMC5	22.323	22.5783	22.7133	22.5382	23.5425	23.5781	23.3387	23.4864	0.00388108	0.948233
P62241	P62241	Small ribosomal subunit protein eS8	RPS8	28.3242	28.8143	28.6603	28.5996	28.3118	28.2535	27.8851	28.1501	0.0849885	-0.449467
P62244	P62244	Small ribosomal subunit protein uS8	RPS15A	26.7595	26.4329	26.3313	26.5079	25.6768	26.1127	26.494	26.0945	0.219229	-0.4134
P62249	P62249	Small ribosomal subunit protein uS9	RPS16	25.9315	26.8955	26.2886	26.3719	25.9689	26.0323	26.1282	26.0431	0.362931	-0.328733
P62258	P62258	14-3-3 protein epsilon	YWHAE	26.7278	27.8004	27.5409	27.3564	27.7183	27.5614	27.1373	27.4723	0.772158	0.115967
P62263	P62263	Small ribosomal subunit protein uS11	RPS14	27.8279	27.9965	27.5098	27.7781	27.5356	27.9512	27.7468	27.7445	0.866242	-0.0335333
P62266	P62266	Small ribosomal subunit protein uS12	RPS23	25.5833	26.0592	25.5997	25.7474	25.7673	25.89	26.3056	25.9876	0.346893	0.240233
P62269	P62269	Small ribosomal subunit protein uS13	RPS18	28.5567	28.9384	28.4139	28.6363	28.4762	28.2243	27.985	28.2285	0.126407	-0.407833
P62273	P62273	Small ribosomal subunit protein uS14	RPS29	21.5814	25.2084	24.9528	23.9142	24.548	24.5866	16.589	21.9079	0.543618	-2.00633
P62277	P62277	Small ribosomal subunit protein uS15	RPS13	27.8564	28.3204	27.9484	28.0417	27.9253	27.9938	27.6935	27.8709	0.376979	-0.170867
P62280	P62280	Small ribosomal subunit protein uS17	RPS11	26.9249	27.3526	26.4165	26.898	26.2973	26.8893	26.9556	26.7141	0.620974	-0.183933
P62304	P62304	Small nuclear ribonucleoprotein E	SNRPE	26.1369	25.9511	25.5218	25.8699	26.1153	27.1384	26.2211	26.4916	0.18946	0.621667
P62306	P62306	Small nuclear ribonucleoprotein F	SNRPF	26.1007	26.1354	25.311	25.849	25.3301	25.9745	26.1229	25.8092	0.917861	-0.0398667
P62310	P62310	U6 snRNA-associated Sm-like protein LSm3	LSM3	26.1641	24.4141	24.3454	24.9745	24.6334	26.6303	25.8544	25.706	0.428883	0.7315
P62314	P62314	Small nuclear ribonucleoprotein Sm D1	SNRPD1	25.1121	26.2038	25.3811	25.5657	25.3609	25.6957	25.5892	25.5486	0.964207	-0.0170667
P62316	P62316	Small nuclear ribonucleoprotein Sm D2	SNRPD2	27.718	28.1631	27.4706	27.7839	27.5732	28.0052	27.5665	27.715	0.797136	-0.0689333
P62318	P62318	Small nuclear ribonucleoprotein Sm D3	SNRPD3	27.9364	28.308	28.1244	28.1229	28.4253	28.5199	27.8709	28.272	0.56097	0.1491
P62333	P62333	26S proteasome regulatory subunit 10B	PSMC6	23.7981	24.5381	24.3422	24.2261	24.1916	24.2452	23.7295	24.0554	0.571526	-0.1707
P62424	P62424	Large ribosomal subunit protein eL8	RPL7A	28.3251	28.2634	28.0217	28.2034	27.6077	28.6234	28.3082	28.1798	0.94589	-0.0236333
P62487	P62487	DNA-directed RNA polymerase II subunit RPB7	POLR2G	20.316	21.0953	20.6738	20.695	20.9857	19.3376	15.5492	18.6242	0.326475	-2.07087
P62495	P62495	Eukaryotic peptide chain release factor subunit 1	ETF1	23.4773	23.581	23.1175	23.3919	23.0154	23.5052	22.6104	23.0437	0.319858	-0.348267
P62633	P62633	CCHC-type zinc finger nucleic acid binding protein	CNBP	23.6624	24.5135	23.8722	24.016	23.7277	24.1078	23.3863	23.7406	0.45278	-0.275433
P62699	P62699	Protein yippee-like 5	YPEL5	15.8006	19.5844	17.9941	17.793	19.2545	20.7842	19.1848	19.7412	0.211448	1.94813
P62701;Q8TD47;P22090	P62701	Small ribosomal subunit protein eS4, X isoform	RPS4X	27.911	28.3741	28.2084	28.1645	27.895	28.013	27.5254	27.8111	0.152171	-0.353367
P62714	P62714	Serine/threonine-protein phosphatase 2A catalytic subunit beta isoform	PPP2CB	17.5058	22.3661	21.2808	20.3842	21.0735	21.5553	16.9948	19.8745	0.81715	-0.5097
P62745	P62745	Rho-related GTP-binding protein RhoB	RHOB	22.7172	23.0668	22.4159	22.7333	22.63	22.4481	22.6548	22.5776	0.502088	-0.155667
P62750	P62750	Large ribosomal subunit protein uL23	RPL23A	28.1425	28.4303	28.2275	28.2668	28.0554	28.0731	27.9827	28.0371	0.10339	-0.2297
P62753	P62753	Small ribosomal subunit protein eS6	RPS6	27.9423	27.8411	27.8106	27.8647	27.9194	27.9579	26.7563	27.5445	0.502517	-0.320133
P62805	P62805	Histone H4	H4C1	31.359	29.8957	29.5433	30.266	31.0824	30.7239	31.7486	31.185	0.239643	0.918967
P62820;P59190	P62820	Ras-related protein Rab-1A	RAB1A	26.3623	26.3951	26.4999	26.4191	26.6493	25.9574	26.1843	26.2637	0.527257	-0.155433
P62826	P62826	GTP-binding nuclear protein Ran	RAN	24.5309	25.093	24.7962	24.8067	24.6791	25.187	25.0495	24.9719	0.498703	0.165167
P62829	P62829	Large ribosomal subunit protein uL14	RPL23	27.0591	27.2031	26.7505	27.0042	26.6705	26.7734	26.9174	26.7871	0.24545	-0.217133
P62834	P62834	Ras-related protein Rap-1A	RAP1A	21.1535	16.4541	17.2472	18.2849	17.2104	18.5929	21.0979	18.9671	0.731348	0.682133
P62841	P62841	Small ribosomal subunit protein uS19	RPS15	22.4833	22.3104	21.3213	22.0383	20.8166	22.6361	22.1368	21.8632	0.803445	-0.175167
P62847	P62847	Small ribosomal subunit protein eS24	RPS24	26.5138	26.7309	26.0473	26.4307	26.0773	26.778	26.7525	26.5359	0.748016	0.105267
P62851	P62851	Small ribosomal subunit protein eS25	RPS25	28.4777	28.7836	28.5097	28.5903	27.8531	28.6608	28.4821	28.332	0.4087	-0.258333
P62854;Q5JNZ5	P62854;Q5JNZ5	Small ribosomal subunit protein eS26;Putative ribosomal protein eS26-like	RPS26;RPS26P11	27.4483	27.7961	27.3526	27.5323	27.2579	27.524	27.2527	27.3449	0.31992	-0.187467
P62857	P62857	Small ribosomal subunit protein eS28	RPS28	25.7467	26.0202	25.6729	25.8133	25.5479	26.1453	25.4799	25.7244	0.732264	-0.0889
P62861	P62861	Ubiquitin-like FUBI-ribosomal protein eS30 fusion protein;Ubiquitin-like protein FUBI;Small ribosomal subunit protein eS30	FAU	27.2033	26.9796	26.5654	26.9161	26.7438	27.4282	26.6783	26.9501	0.916643	0.034
P62873	P62873	Guanine nucleotide-binding protein G(I)/G(S)/G(T) subunit beta-1	GNB1	25.7447	25.3516	24.467	25.1878	25.7674	25.6375	25.3577	25.5875	0.403992	0.399767
P62877	P62877	E3 ubiquitin-protein ligase RBX1;E3 ubiquitin-protein ligase RBX1, N-terminally processed	RBX1	24.2479	24.1686	24.4706	24.2957	24.3539	24.8206	24.1085	24.4277	0.606439	0.131967
P62879	P62879	Guanine nucleotide-binding protein G(I)/G(S)/G(T) subunit beta-2	GNB2	27.1371	27.7807	27.624	27.5139	27.6717	27.4992	27.2185	27.4631	0.84043	-0.0508
P62888	P62888	Large ribosomal subunit protein eL30	RPL30	28.1088	28.4372	27.8611	28.1357	27.6006	28.1671	27.8913	27.8863	0.34599	-0.249367
P62891;Q59GN2	P62891;Q59GN2	Large ribosomal subunit protein eL39;Putative ribosomal protein eL39-like 5	RPL39;RPL39P5	26.0503	25.5151	16.5783	22.7146	26.2114	26.3543	26.5116	26.3591	0.357294	3.64453
P62899	P62899	Large ribosomal subunit protein eL31	RPL31	27.8711	28.3386	27.8139	28.0079	27.7243	27.7877	27.7575	27.7565	0.268778	-0.251367
P62906	P62906	Large ribosomal subunit protein uL1	RPL10A	27.7457	27.818	27.7858	27.7832	27.4295	27.4071	27.3509	27.3958	0.000265318	-0.387333
P62910	P62910	Large ribosomal subunit protein eL32	RPL32	26.592	25.5798	24.2498	25.4739	23.9204	26.2065	26.9918	25.7062	0.84978	0.232367
P62913	P62913	Large ribosomal subunit protein uL5	RPL11	27.5295	27.4966	27.3629	27.463	27.2627	27.4438	27.3995	27.3687	0.275022	-0.0943333
P62917	P62917	Large ribosomal subunit protein uL2	RPL8	27.2754	27.6891	27.3055	27.4233	27.0806	27.1787	26.7979	27.0191	0.0840396	-0.404267
P62937;Q9Y536	P62937	Peptidyl-prolyl cis-trans isomerase A;Peptidyl-prolyl cis-trans isomerase A, N-terminally processed	PPIA	23.2323	24.253	21.9626	23.1493	22.2237	23.4828	23.0176	22.908	0.770248	-0.241267
P62979;P0CG48;P0CG47;P62987	P62979;P0CG48;P0CG47;P62987	Ubiquitin-ribosomal protein eS31 fusion protein;Ubiquitin;Small ribosomal subunit protein eS31;Polyubiquitin-C;Ubiquitin;Polyubiquitin-B;Ubiquitin;Ubiquitin-ribosomal protein eL40 fusion protein;Ubiquitin;Large ribosomal subunit protein eL40	RPS27A;UBC;UBB;UBA52	29.5673	30.0446	30.0751	29.8957	30.025	29.7317	29.5924	29.783	0.618682	-0.112633
P62995	P62995	Transformer-2 protein homolog beta	TRA2B	26.6674	27.3004	27.2735	27.0804	27.4883	27.3836	26.5398	27.1372	0.884621	0.0568
P63000;P15153;P60763	P63000	Ras-related C3 botulinum toxin substrate 1	RAC1	25.0067	23.7421	23.7693	24.1727	23.6104	23.9857	24.7469	24.1143	0.918545	-0.0583667
P63010	P63010	AP-2 complex subunit beta	AP2B1	25.2464	25.639	25.3858	25.4237	25.3672	25.5118	25.1109	25.33	0.598416	-0.0937667
Q15836;P63027	Q15836;P63027	Vesicle-associated membrane protein 3;Vesicle-associated membrane protein 2	VAMP3;VAMP2	22.8799	22.7936	22.3988	22.6908	22.2538	15.7784	22.932	20.3214	0.407874	-2.36937
P63092;Q5JWF2;P38405	P63092;Q5JWF2	Guanine nucleotide-binding protein G(s) subunit alpha isoforms short;Guanine nucleotide-binding protein G(s) subunit alpha isoforms XLas	GNAS	23.6385	23.3277	23.5583	23.5082	23.4296	23.1464	23.3223	23.2994	0.16988	-0.208733
P63096	P63096	Guanine nucleotide-binding protein G(i) subunit alpha-1	GNAI1	19.8581	19.8385	18.0639	19.2535	16.7044	19.5601	20.5766	18.947	0.829237	-0.306467
P63098	P63098	Calcineurin subunit B type 1	PPP3R1	20.6189	18.0209	20.3686	19.6695	20.8507	21.4668	21.2651	21.1942	0.202514	1.52473
P63104	P63104	14-3-3 protein zeta/delta	YWHAZ	27.0321	27.6511	27.2672	27.3168	27.4859	27.4831	26.8209	27.2633	0.860796	-0.0535
P63151;Q66LE6	P63151;Q66LE6	Serine/threonine-protein phosphatase 2A 55 kDa regulatory subunit B alpha isoform;Serine/threonine-protein phosphatase 2A 55 kDa regulatory subunit B delta isoform	PPP2R2A;PPP2R2D	18.7361	19.9914	19.7904	19.506	19.9973	18.8778	19.3562	19.4104	0.859909	-0.0955333
P63165;G2XKQ0	P63165;G2XKQ0	Small ubiquitin-related modifier 1;Small ubiquitin-related modifier 5	SUMO1;SUMO1P1	23.83	24.293	24.4346	24.1859	24.3143	25.1572	24.3913	24.6209	0.26077	0.435067
P63167	P63167	Dynein light chain 1, cytoplasmic	DYNLL1	22.6577	21.8891	22.5897	22.3788	22.3043	22.5786	22.6805	22.5211	0.637173	0.1423
P63173	P63173	Large ribosomal subunit protein eL38	RPL38	26.1951	26.8045	26.2285	26.4094	26.0547	26.1011	25.9645	26.0401	0.199117	-0.369267
P63208	P63208	S-phase kinase-associated protein 1	SKP1	24.7078	24.8504	24.2305	24.5962	24.2027	24.8922	24.2155	24.4368	0.618516	-0.159433
P63220	P63220	Small ribosomal subunit protein eS21	RPS21	27.5086	27.6508	27.1762	27.4452	27.2479	27.7046	27.3065	27.4197	0.904998	-0.0255333
P63241;Q9GZV4;Q6IS14	P63241;Q9GZV4;Q6IS14	Eukaryotic translation initiation factor 5A-1;Eukaryotic translation initiation factor 5A-2;Eukaryotic translation initiation factor 5A-1-like	EIF5A;EIF5A2;EIF5AL1	27.7719	28.3076	27.1658	27.7484	27.5715	27.3566	26.9096	27.2792	0.302096	-0.4692
P63244	P63244	Small ribosomal subunit protein RACK1;Small ribosomal subunit protein RACK1, N-terminally processed	RACK1	28.8346	29.3542	29.2144	29.1344	28.9329	28.7558	28.4187	28.7025	0.116748	-0.431933
P63261	P63261	Actin, cytoplasmic 2;Actin, cytoplasmic 2, N-terminally processed	ACTG1	32.5874	33.0673	32.9316	32.8621	32.9834	32.4376	32.1852	32.5354	0.314048	-0.3267
P63272	P63272	Transcription elongation factor SPT4	SUPT4H1	23.764	24.1017	23.5678	23.8112	23.7782	23.5485	23.6836	23.6701	0.472431	-0.141067
P63279	P63279	SUMO-conjugating enzyme UBC9	UBE2I	20.1283	23.0689	23.0039	22.067	20.7909	22.5384	20.7005	21.3433	0.566212	-0.723767
P67775	P67775	Serine/threonine-protein phosphatase 2A catalytic subunit alpha isoform	PPP2CA	25.0947	25.576	25.0176	25.2294	24.9214	25.3798	24.6568	24.986	0.426286	-0.243433
P67809	P67809	Y-box-binding protein 1	YBX1	26.5731	27.3398	27.1487	27.0205	27.292	26.84	26.2716	26.8012	0.591276	-0.219333
P67812	P67812	Signal peptidase complex catalytic subunit SEC11A	SEC11A	22.1549	16.4037	18.3515	18.97	19.9501	17.6548	21.0261	19.5437	0.78751	0.573633
P67870	P67870	Casein kinase II subunit beta	CSNK2B	25.0534	25.6023	25.2776	25.3111	25.3487	25.7401	25.0015	25.3634	0.854502	0.0523333
P67936	P67936	Tropomyosin alpha-4 chain	TPM4	27.0447	27.7589	28.1662	27.6566	28.17	27.7963	27.5096	27.8253	0.684819	0.1687
P68133;P68032;P62736;P63267	P68133;P68032;P62736;P63267	Actin, alpha skeletal muscle;Actin, alpha skeletal muscle, intermediate form;Actin, alpha cardiac muscle 1;Actin, alpha cardiac muscle 1, intermediate form;Actin, aortic smooth muscle;Actin, aortic smooth muscle, intermediate form;Actin, gamma-enteric smooth muscle;Actin, gamma-enteric smooth muscle, intermediate form	ACTA1;ACTC1;ACTA2;ACTG2	28.0827	28.8207	28.7999	28.5678	29.2121	27.9101	28.0225	28.3816	0.723436	-0.1862
P68104;Q5VTE0	P68104;Q5VTE0	Elongation factor 1-alpha 1;Putative elongation factor 1-alpha-like 3	EEF1A1;EEF1A1P5	29.4634	29.6353	29.4975	29.5321	29.6682	29.2758	29.2775	29.4072	0.448284	-0.1249
P68363;P68366;A6NHL2;Q9H853	P68363;P68366	Tubulin alpha-1B chain;Detyrosinated tubulin alpha-1B chain;Tubulin alpha-4A chain	TUBA1B;TUBA4A	24.6	24.9157	24.9016	24.8058	24.8088	24.7913	24.8689	24.823	0.884111	0.0172333
P68371	P68371	Tubulin beta-4B chain	TUBB4B	27.6954	28.0738	27.9773	27.9155	28.2399	27.9921	27.753	27.995	0.683615	0.0795
P68400;Q8NEV1	P68400;Q8NEV1	Casein kinase II subunit alpha;Casein kinase II subunit alpha 3	CSNK2A1;CSNK2A3	24.0476	23.8033	23.6418	23.8309	24.2222	24.0918	23.9163	24.0768	0.176451	0.245867
P68431;P84243;Q71DI3;Q16695;Q6NXT2	P68431;P84243;Q71DI3;Q16695;Q6NXT2	Histone H3.1;Histone H3.3;Histone H3.2;Histone H3.1t;Histone H3.3C	H3C1;H3-3A;H3C15;H3-4;H3-5	30.3387	29.1268	28.4	29.2885	30.1651	29.651	30.7289	30.1817	0.257407	0.893167
P68871	P68871	Hemoglobin subunit beta;LVV-hemorphin-7;Spinorphin	HBB	16.6864	19.6811	25.3751	20.5809	16.3855	17.8237	14.8921	16.3671	0.234839	-4.21377
P69905	P69905	Hemoglobin subunit alpha;Hemopressin	HBA1	15.5937	18.4661	22.8364	18.9654	17.3427	16.5975	14.5412	16.1605	0.315246	-2.80493
P78310	P78310	Coxsackievirus and adenovirus receptor	CXADR	17.0247	18.8865	18.9883	18.2998	18.9242	17.5033	18.5232	18.3169	0.983437	0.0170667
P78316	P78316	Nucleolar protein 14	NOP14	20.4957	17.9773	18.7798	19.0843	20.5003	21.2952	20.571	20.7888	0.137755	1.70457
P78344	P78344	Eukaryotic translation initiation factor 4 gamma 2	EIF4G2	23.4839	23.5299	23.6558	23.5565	23.0344	23.5912	23.4812	23.3689	0.387304	-0.1876
P78346	P78346	Ribonuclease P protein subunit p30	RPP30	20.3997	20.9289	21.0455	20.7914	19.9378	21.4715	21.0742	20.8278	0.946953	0.0364667
P78347	P78347	General transcription factor II-I	GTF2I	18.9737	18.1987	18.4226	18.5317	18.032	17.6556	18.0356	17.9077	0.0951141	-0.623933
P78362	P78362	SRSF protein kinase 2;SRSF protein kinase 2 N-terminal;SRSF protein kinase 2 C-terminal	SRPK2	20.146	20.0191	20.0873	20.0841	20.6485	21.1534	19.8792	20.5604	0.32706	0.476233
P78371	P78371	T-complex protein 1 subunit beta	CCT2	27.0822	27.5107	27.4333	27.3421	27.3988	27.3577	26.9509	27.2358	0.613974	-0.106267
P78406	P78406	mRNA export factor RAE1	RAE1	24.4377	25.4463	24.8855	24.9232	25.0007	25.1121	24.5022	24.8717	0.890309	-0.0515
P78524	P78524	DENN domain-containing protein 2B	DENND2B	15.3059	18.6027	18.8895	17.5994	19.5866	18.0779	17.8747	18.5131	0.526553	0.9137
P78527	P78527	DNA-dependent protein kinase catalytic subunit	PRKDC	18.1786	17.8481	17.4618	17.8295	18.177	17.1893	18.3035	17.8899	0.891163	0.0604333
P81605	P81605	Dermcidin;Survival-promoting peptide;DCD-1	DCD	22.8707	26.0616	25.608	24.8468	23.9503	21.5783	22.5378	22.6888	0.158379	-2.15797
P82650	P82650	Small ribosomal subunit protein mS22	MRPS22	20.1814	22.2169	21.5189	21.3057	20.6979	21.1966	20.6895	20.8613	0.53914	-0.4444
P82663	P82663	Small ribosomal subunit protein mS25	MRPS25	17.1026	16.6024	17.5433	17.0828	16.3178	20.7572	17.1965	18.0905	0.537368	1.00773
P82664	P82664	Small ribosomal subunit protein uS10m	MRPS10	20.2802	21.4489	21.3816	21.0369	20.9914	21.4757	20.1506	20.8726	0.77672	-0.164333
P82673	P82673	Small ribosomal subunit protein mS35	MRPS35	20.5433	22.1815	21.9141	21.5463	20.8007	19.7676	20.181	20.2498	0.108431	-1.29653
P82914	P82914	Small ribosomal subunit protein uS15m	MRPS15	20.5238	15.9761	16.7295	17.7431	16.114	20.2202	20.0353	18.7898	0.618648	1.0467
P82930	P82930	Small ribosomal subunit protein mS34	MRPS34	20.7881	21.7495	21.8395	21.459	21.6641	20.5609	20.6316	20.9522	0.359791	-0.506833
P82932	P82932	Small ribosomal subunit protein bS6m	MRPS6	19.4899	20.7566	20.5063	20.2509	20.5804	21.0916	20.5367	20.7362	0.342654	0.4853
P82933	P82933	Small ribosomal subunit protein uS9m	MRPS9	19.5682	19.6958	20.9436	20.0692	19.6329	20.7021	20.3463	20.2271	0.785836	0.1579
P82979	P82979	SAP domain-containing ribonucleoprotein	SARNP	24.2649	24.6223	24.8024	24.5632	25.5428	25.2604	24.7498	25.1843	0.100442	0.621133
P83111	P83111	Serine beta-lactamase-like protein LACTB, mitochondrial	LACTB	20.711	20.3816	21.3822	20.8249	21.9022	22.0565	21.3933	21.784	0.0623616	0.959067
P83731	P83731	Large ribosomal subunit protein eL24	RPL24	27.1875	27.3251	27.2184	27.2437	26.0576	27.0258	26.9026	26.662	0.194129	-0.581667
P83881	P83881	Large ribosomal subunit protein eL42	RPL36A	24.0031	23.6282	22.4527	23.3613	23.5804	23.0359	23.0597	23.2253	0.805875	-0.136
P83916	P83916	Chromobox protein homolog 1	CBX1	25.2028	25.8875	25.463	25.5178	25.6111	25.6871	24.9124	25.4035	0.737692	-0.114233
P84090	P84090	Enhancer of rudimentary homolog	ERH	27.2615	27.5944	26.9792	27.2784	27.1972	27.9498	27.6929	27.6133	0.305693	0.334933
P84095	P84095	Rho-related GTP-binding protein RhoG	RHOG	20.9344	21.3564	20.8506	21.0471	20.3073	20.4597	21.3383	20.7018	0.407396	-0.345367
P84098	P84098	Large ribosomal subunit protein eL19	RPL19	28.2818	28.5946	28.136	28.3375	27.8596	28.0957	27.6885	27.8813	0.0650452	-0.4562
P84103	P84103	Serine/arginine-rich splicing factor 3	SRSF3	27.9993	28.7218	28.6235	28.4482	28.8054	28.8647	28.1957	28.6219	0.60661	0.173733
P85037	P85037	Forkhead box protein K1	FOXK1	19.3555	17.6563	19.0202	18.6773	18.1906	17.3738	18.215	17.9265	0.290578	-0.750867
P98175	P98175	RNA-binding protein 10	RBM10	21.9219	22.7275	23.0171	22.5555	22.7959	22.9416	22.622	22.7865	0.558908	0.231
P98179	P98179	RNA-binding protein 3	RBM3	25.6029	26.1483	25.8213	25.8575	26.0052	26.1797	25.647	25.944	0.717883	0.0864667
P98194	P98194	Calcium-transporting ATPase type 2C member 1	ATP2C1	17.9215	18.3857	17.3875	17.8982	18.1117	17.3429	15.6295	17.028	0.361109	-0.8702
Q00059	Q00059	Transcription factor A, mitochondrial	TFAM	24.8968	24.6212	24.4788	24.6656	23.8655	24.4543	24.7839	24.3679	0.392438	-0.2977
Q00325	Q00325	Solute carrier family 25 member 3	SLC25A3	26.0395	23.8262	24.6073	24.8243	24.0668	23.6744	25.7547	24.4986	0.738375	-0.3257
Q00341	Q00341	Vigilin	HDLBP	22.0871	22.2968	22.3098	22.2312	22.309	22.3216	22.198	22.2762	0.621227	0.0449667
Q00403	Q00403	Transcription initiation factor IIB	GTF2B	20.2781	15.7806	20.0865	18.7151	16.7259	20.2371	20.1295	19.0308	0.874328	0.315767
Q00577	Q00577	Transcriptional activator protein Pur-alpha	PURA	23.6409	24.4115	24.1196	24.0573	24.4553	24.1667	23.6399	24.0873	0.931566	0.0299667
Q00587	Q00587	Cdc42 effector protein 1	CDC42EP1	20.2701	20.5495	21.4136	20.7444	21.3803	21.289	19.8977	20.8557	0.860583	0.111267
Q00610	Q00610	Clathrin heavy chain 1	CLTC	27.2922	27.8687	27.5841	27.5817	27.4315	27.1632	26.9762	27.1903	0.142989	-0.391367
Q00688	Q00688	Peptidyl-prolyl cis-trans isomerase FKBP3	FKBP3	24.7158	25.0559	25.0054	24.9257	25.0029	24.2161	25.0304	24.7498	0.589359	-0.1759
Q00839	Q00839	Heterogeneous nuclear ribonucleoprotein U	HNRNPU	27.9571	28.3722	28.2578	28.1957	28.5409	28.4685	27.8931	28.3008	0.687851	0.105133
Q01081;Q8WU68	Q01081;Q8WU68	Splicing factor U2AF 35 kDa subunit;Splicing factor U2AF 26 kDa subunit	U2AF1;U2AF1L4	25.9502	26.1287	25.5099	25.8629	25.6958	25.8432	25.5116	25.6835	0.450409	-0.1794
Q01082;P11277	Q01082	Spectrin beta chain, non-erythrocytic 1	SPTBN1	22.365	23.0659	23.4976	22.9762	23.7604	24.4816	25.2317	24.4912	0.0513789	1.51507
Q01085	Q01085	Nucleolysin TIAR	TIAL1	24.1932	25.1418	25.0631	24.7994	25.3522	25.4544	24.5146	25.1071	0.509573	0.3077
Q01105;P0DME0	Q01105;P0DME0	Protein SET;Protein SETSIP	SET;SETSIP	27.2537	27.9947	27.9172	27.7219	28.3835	28.0559	27.6444	28.0279	0.390537	0.306067
Q01130	Q01130	Serine/arginine-rich splicing factor 2	SRSF2	28.0638	29.0063	28.7746	28.6149	29.047	28.3554	28.1419	28.5148	0.811801	-0.100133
Q01433	Q01433	AMP deaminase 2	AMPD2	19.845	20.3259	20.2764	20.1491	20.5505	19.8537	19.5662	19.9901	0.662534	-0.158967
Q01484;Q12955	Q01484	Ankyrin-2	ANK2	15.6636	15.0771	16.0334	15.5914	17.5728	15.9055	15.4731	16.3171	0.381649	0.725767
Q01518	Q01518	Adenylyl cyclase-associated protein 1	CAP1	15.6046	16.2601	20.2486	17.3711	20.4614	20.0057	21.489	20.652	0.143054	3.28093
Q01581;P54868	Q01581	Hydroxymethylglutaryl-CoA synthase, cytoplasmic	HMGCS1	19.1963	20.9214	20.9545	20.3574	19.5625	19.1948	20.0769	19.6114	0.331432	-0.746
Q01650;Q92536;Q9UM01	Q01650	Large neutral amino acids transporter small subunit 1	SLC7A5	23.877	23.5105	23.4734	23.6203	23.1122	23.428	23.6901	23.4101	0.378806	-0.2102
Q01780	Q01780	Exosome complex component 10	EXOSC10	20.1749	18.0678	18.5933	18.9453	19.6358	20.0653	21.1444	20.2818	0.167975	1.3365
Q01804	Q01804	OTU domain-containing protein 4	OTUD4	18.1942	18.1908	18.0598	18.1483	17.2895	18.0369	17.3888	17.5717	0.128499	-0.576533
Q01813	Q01813	ATP-dependent 6-phosphofructokinase, platelet type	PFKP	15.4729	18.1576	17.9825	17.2043	18.0665	20.5973	17.46	18.7079	0.310559	1.5036
Q01831	Q01831	DNA repair protein complementing XP-C cells	XPC	15.8225	18.0324	17.688	17.181	15.8419	17.0751	16.232	16.383	0.379035	-0.797967
Q01844	Q01844	RNA-binding protein EWS	EWSR1	24.5803	25.2129	25.0129	24.9354	25.2596	25.3132	24.6738	25.0822	0.624469	0.146833
Q01970	Q01970	1-phosphatidylinositol 4,5-bisphosphate phosphodiesterase beta-3	PLCB3	16.2566	15.9251	15.5359	15.9059	16.2713	15.6794	18.253	16.7346	0.400022	0.8287
Q02127	Q02127	Dihydroorotate dehydrogenase (quinone), mitochondrial	DHODH	17.3654	16.8895	17.9835	17.4128	17.6481	16.8386	17.1242	17.2036	0.627045	-0.209167
Q02218;Q9ULD0	Q02218	2-oxoglutarate dehydrogenase complex component E1	OGDH	22.0119	22.1613	21.9987	22.0573	22.3128	22.2271	21.9878	22.1759	0.359766	0.1186
Q02241	Q02241	Kinesin-like protein KIF23	KIF23	21.9605	21.8079	20.7328	21.5004	20.4984	20.5507	21.8527	20.9673	0.416566	-0.533133
Q02252	Q02252	Methylmalonate-semialdehyde/malonate-semialdehyde dehydrogenase [acylating], mitochondrial	ALDH6A1	18.8165	19.4316	20.5231	19.5904	19.5284	18.9236	19.1855	19.2125	0.536064	-0.3779
Q02338	Q02338	D-beta-hydroxybutyrate dehydrogenase, mitochondrial	BDH1	20.4868	20.3459	20.7766	20.5364	18.0401	20.5009	20.3092	19.6167	0.364406	-0.9197
Q02413	Q02413	Desmoglein-1	DSG1	17.8978	19.5015	18.9366	18.7786	17.6275	18.2644	18.1287	18.0069	0.237146	-0.771767
Q02539	Q02539	Histone H1.1	H1-1	21.1568	22.302	20.9653	21.4747	21.3101	21.6219	22.2907	21.7409	0.631018	0.2662
Q02543	Q02543	Large ribosomal subunit protein eL20	RPL18A	25.8985	26.4363	26.0773	26.1374	25.2	25.5666	25.4977	25.4214	0.0251419	-0.715933
Q02809	Q02809	Procollagen-lysine,2-oxoglutarate 5-dioxygenase 1	PLOD1	23.729	24.095	24.0835	23.9692	24.0912	23.7719	23.6847	23.8493	0.524916	-0.1199
Q02818	Q02818	Nucleobindin-1	NUCB1	19.1075	20.6937	20.9549	20.252	20.7856	19.6185	18.8025	19.7355	0.560706	-0.5165
Q02878	Q02878	Large ribosomal subunit protein eL6	RPL6	27.5404	27.3894	27.1048	27.3449	27.3185	27.6493	27.0902	27.3527	0.971776	0.0078
Q02880	Q02880	DNA topoisomerase 2-beta	TOP2B	18.8412	17.3999	16.3475	17.5295	17.1164	15.9047	19.7546	17.5919	0.965663	0.0623667
Q02978	Q02978	Mitochondrial 2-oxoglutarate/malate carrier protein	SLC25A11	21.6102	20.0656	18.6733	20.1164	18.0686	20.3666	21.6424	20.0259	0.949765	-0.0905
Q03111	Q03111	Protein ENL	MLLT1	19.5261	20.4073	20.3984	20.1106	21.2133	19.8822	19.694	20.2632	0.801543	0.152567
Q03135;P56539	Q03135	Caveolin-1	CAV1	25.1861	25.6445	25.6306	25.4871	25.4782	24.7512	24.9623	25.0639	0.191603	-0.423167
Q03164	Q03164	Histone-lysine N-methyltransferase 2A;MLL cleavage product N320;MLL cleavage product C180	KMT2A	16.6349	16.5021	17.4523	16.8631	16.6514	15.8996	14.3292	15.6267	0.20491	-1.23637
Q03252	Q03252	Lamin-B2	LMNB2	25.2357	26.1198	25.9168	25.7574	26.1901	25.9384	25.3271	25.8185	0.876968	0.0611
Q03405	Q03405	Urokinase plasminogen activator surface receptor	PLAUR	20.1123	19.6927	19.856	19.887	19.1369	21.0244	20.8647	20.342	0.53227	0.455
Q03518	Q03518	Antigen peptide transporter 1	TAP1	18.1696	18.5903	16.9651	17.9083	16.9688	16.9604	19.5019	17.8104	0.926014	-0.0979667
Q03701	Q03701	CCAAT/enhancer-binding protein zeta	CEBPZ	21.5068	23.0185	22.9315	22.4856	21.1507	21.9274	22.0172	21.6984	0.251819	-0.787167
Q04637;O43432;REV__Q8NEG2	Q04637	Eukaryotic translation initiation factor 4 gamma 1	EIF4G1	23.3676	22.6301	22.6778	22.8918	22.9296	22.6642	23.3387	22.9775	0.79559	0.0856667
Q04721	Q04721	Neurogenic locus notch homolog protein 2;Notch 2 extracellular truncation;Notch 2 intracellular domain	NOTCH2	16.299	17.5534	16.2278	16.6934	17.6343	18.1212	15.7951	17.1835	0.592381	0.490133
Q04837	Q04837	Single-stranded DNA-binding protein, mitochondrial	SSBP1	24.0948	23.7153	23.3912	23.7338	23.1374	23.9892	23.9607	23.6958	0.918185	-0.038
Q04917	Q04917	14-3-3 protein eta	YWHAH	24.8605	25.4234	24.9409	25.0749	25.0773	25.1648	24.6091	24.9504	0.639703	-0.124533
Q04941	Q04941	Proteolipid protein 2	PLP2	24.4765	24.2279	23.5769	24.0938	20.3933	20.538	24.6659	21.8657	0.250296	-2.22803
Q05048	Q05048	Cleavage stimulation factor subunit 1	CSTF1	24.9556	25.5467	25.369	25.2904	25.1904	25.1658	24.2384	24.8649	0.317704	-0.425567
Q05397	Q05397	Focal adhesion kinase 1	PTK2	19.6764	17.4875	17.399	18.1876	19.2564	19.3756	19.5812	19.4044	0.242688	1.21677
Q05519	Q05519	Serine/arginine-rich splicing factor 11	SRSF11	23.3731	23.5528	23.2737	23.3999	22.7714	23.6094	23.2831	23.2213	0.547657	-0.178567
Q05639	Q05639	Elongation factor 1-alpha 2	EEF1A2	22.439	22.4536	21.9283	22.2736	22.5289	21.6791	21.4969	21.9016	0.377712	-0.372
Q05682;REV__O75334;REV__Q13136	Q05682	Caldesmon	CALD1	23.9927	24.4715	23.8059	24.09	24.7287	24.458	23.6948	24.2938	0.613639	0.2038
Q05D32	Q05D32	CTD small phosphatase-like protein 2	CTDSPL2	18.6047	16.2729	17.005	17.2942	17.4319	18.2016	15.883	17.1722	0.905854	-0.122033
Q06210;O94808	Q06210	Glutamine--fructose-6-phosphate aminotransferase [isomerizing] 1	GFPT1	23.3094	23.8149	23.5583	23.5609	23.3105	23.0301	22.7078	23.0161	0.0765068	-0.544733
Q06265	Q06265	Exosome complex component RRP45	EXOSC9	23.0704	23.1501	23.4237	23.2147	23.6302	23.1186	23.1121	23.287	0.742301	0.0722333
Q06323	Q06323	Proteasome activator complex subunit 1	PSME1	19.1816	19.6983	20.4229	19.7676	19.3463	19.741	19.9182	19.6685	0.820143	-0.0991
Q06481	Q06481	Amyloid beta precursor like protein 2	APLP2	24.7998	25.8495	25.8373	25.4955	25.7485	24.2452	23.4108	24.4682	0.273885	-1.02737
Q06587	Q06587	E3 ubiquitin-protein ligase RING1	RING1	22.5524	23.2239	23.309	23.0284	21.8818	23.4796	22.5721	22.6445	0.514506	-0.383933
Q06787	Q06787	Fragile X messenger ribonucleoprotein 1	FMR1	18.4217	16.8896	18.915	18.0754	17.0679	19.0916	19.0782	18.4126	0.729328	0.337133
Q06830	Q06830	Peroxiredoxin-1	PRDX1	27.2493	27.9896	27.9216	27.7202	27.7728	27.6866	27.1261	27.5285	0.572138	-0.191667
Q07020	Q07020	Large ribosomal subunit protein eL18	RPL18	27.8831	27.715	27.0673	27.5551	26.6346	27.6312	27.4737	27.2465	0.482088	-0.308633
Q07021	Q07021	Complement component 1 Q subcomponent-binding protein, mitochondrial	C1QBP	25.033	25.0741	25.0067	25.0379	25.4614	25.6564	24.9434	25.3537	0.275469	0.3158
Q07065;Q96K21	Q07065	Cytoskeleton-associated protein 4	CKAP4	25.5904	23.6766	24.7945	24.6872	24.2775	23.2919	25.0389	24.2028	0.554282	-0.4844
Q07157	Q07157	Tight junction protein ZO-1	TJP1	21.5845	21.9957	22.1961	21.9254	22.4054	21.8015	21.8048	22.0039	0.785677	0.0784667
Q07617	Q07617	Sperm-associated antigen 1	SPAG1	16.493	16.7051	17.4582	16.8854	18.808	16.1055	16.4951	17.1362	0.800601	0.250767
Q07666;Q5VWX1	Q07666	KH domain-containing, RNA-binding, signal transduction-associated protein 1	KHDRBS1	24.8197	24.4993	24.9966	24.7719	25.3692	25.0001	24.6898	25.0197	0.372434	0.247833
Q07866	Q07866	Kinesin light chain 1	KLC1	17.8681	18.7679	16.5244	17.7201	18.4686	18.4964	17.6397	18.2016	0.550844	0.481433
Q07955	Q07955	Serine/arginine-rich splicing factor 1	SRSF1	27.9725	28.5705	28.3798	28.3076	28.4357	28.2879	27.6053	28.1096	0.56271	-0.197967
Q08170	Q08170	Serine/arginine-rich splicing factor 4	SRSF4	23.964	25.2545	25.1414	24.7866	24.827	23.6512	22.7604	23.7462	0.234132	-1.04043
Q08209;P16298;P48454	Q08209	Protein phosphatase 3 catalytic subunit alpha	PPP3CA	20.7755	21.5685	21.3173	21.2204	21.142	22.0194	21.1336	21.4317	0.60534	0.211233
Q08211	Q08211	ATP-dependent RNA helicase A	DHX9	25.848	26.6408	26.5242	26.3377	26.4175	26.2452	26.0935	26.2521	0.770598	-0.0856
Q08378	Q08378	Golgin subfamily A member 3	GOLGA3	16.1209	16.566	16.9594	16.5488	16.8874	16.4021	16.4387	16.5761	0.9298	0.0273
Q08379	Q08379	Golgin subfamily A member 2	GOLGA2	18.7655	19.1309	18.5804	18.8256	19.3049	19.0463	18.8692	19.0735	0.297431	0.247867
Q08380	Q08380	Galectin-3-binding protein	LGALS3BP	21.2254	20.3436	21.8355	21.1348	22.3399	22.1005	21.2602	21.9002	0.236391	0.765367
Q08431	Q08431	Lactadherin;Lactadherin short form;Medin	MFGE8	22.7285	22.7577	22.6664	22.7175	22.0653	22.3316	22.1635	22.1868	0.0132617	-0.530733
Q08945	Q08945	FACT complex subunit SSRP1	SSRP1	26.592	27.1406	26.9222	26.8849	27.0156	26.8595	26.2959	26.7237	0.586045	-0.161267
Q08AF3	Q08AF3	Schlafen family member 5	SLFN5	17.0181	17.5123	17.3532	17.2945	15.1791	16.5128	16.1731	15.955	0.0650209	-1.33953
Q08AM6	Q08AM6	Protein VAC14 homolog	VAC14	20.7207	20.5756	20.3564	20.5509	20.1813	20.2219	20.2349	20.2127	0.082402	-0.3382
Q08J23	Q08J23	RNA cytosine C(5)-methyltransferase NSUN2	NSUN2	22.0223	22.5787	22.4354	22.3455	22.4292	22.7129	22.8804	22.6742	0.200593	0.3287
Q09028	Q09028	Histone-binding protein RBBP4	RBBP4	27.8927	28.3791	28.5304	28.2674	28.6381	28.47	27.9284	28.3455	0.799713	0.0781
Q09161	Q09161	Nuclear cap-binding protein subunit 1	NCBP1	23.5005	23.8577	23.6271	23.6618	23.4708	23.4834	23.6008	23.5183	0.303777	-0.143433
Q09328	Q09328	Alpha-1,6-mannosylglycoprotein 6-beta-N-acetylglucosaminyltransferase A;Secreted alpha-1,6-mannosylglycoprotein 6-beta-N-acetylglucosaminyltransferase A	MGAT5	17.4384	15.783	15.5113	16.2442	15.8498	17.9337	16.5498	16.7778	0.568093	0.533533
Q09666	Q09666	Neuroblast differentiation-associated protein AHNAK	AHNAK	22.8881	23.2696	23.242	23.1332	23.5836	23.3366	22.9837	23.3013	0.478919	0.168067
Q0VAA5	Q0VAA5	PI-PLC X domain-containing protein 2	PLCXD2	16.4074	22.094	22.3179	20.2731	16.1643	20.5824	19.9863	18.911	0.600467	-1.3621
Q0VDF9	Q0VDF9	Heat shock 70 kDa protein 14	HSPA14	21.3153	19.4292	19.946	20.2302	20.983	20.7317	21.4557	21.0568	0.277307	0.826633
Q0ZGT2	Q0ZGT2	Nexilin	NEXN	22.1028	22.818	22.7292	22.55	22.8126	22.9018	22.1636	22.626	0.825907	0.076
Q10469	Q10469	Alpha-1,6-mannosyl-glycoprotein 2-beta-N-acetylglucosaminyltransferase	MGAT2	18.8405	15.8365	18.0573	17.5781	18.6045	17.0988	18.7341	18.1458	0.621225	0.5677
Q10471	Q10471	Polypeptide N-acetylgalactosaminyltransferase 2;Polypeptide N-acetylgalactosaminyltransferase 2 soluble form	GALNT2	20.6043	16.4374	18.2602	18.434	17.8568	17.6994	20.0028	18.5197	0.955211	0.0857
Q10567	Q10567	AP-1 complex subunit beta-1	AP1B1	22.9035	23.3215	23.0888	23.1046	23.3268	23.2759	22.8747	23.1591	0.785734	0.0545333
Q10570	Q10570	Cleavage and polyadenylation specificity factor subunit 1	CPSF1	21.9393	22.1834	22.3939	22.1722	22.1613	22.0048	22.0695	22.0785	0.557917	-0.0936667
Q10713	Q10713	Mitochondrial-processing peptidase subunit alpha	PMPCA	19.1159	19.8573	19.4966	19.4899	19.9397	19.9889	19.1959	19.7082	0.550347	0.218233
Q12768	Q12768	WASH complex subunit 5	WASHC5	20.9145	20.7959	20.411	20.7071	20.8949	20.6578	21.1321	20.8949	0.411044	0.1878
Q12769	Q12769	Nuclear pore complex protein Nup160	NUP160	22.2854	23.0013	22.546	22.6109	22.0578	22.5269	22.4902	22.3583	0.387766	-0.2526
Q12788	Q12788	Transducin beta-like protein 3	TBL3	21.7814	21.7413	21.702	21.7416	22.4218	21.8956	22.0141	22.1105	0.143987	0.368933
Q12789	Q12789	General transcription factor 3C polypeptide 1	GTF3C1	15.6812	20.7039	20.5742	18.9864	18.3907	17.006	17.228	17.5416	0.477373	-1.44487
Q12797	Q12797	Aspartyl/asparaginyl beta-hydroxylase	ASPH	22.8232	23.0531	22.7477	22.8747	22.9537	22.8702	23.1273	22.9837	0.413114	0.109067
Q12824	Q12824	SWI/SNF-related matrix-associated actin-dependent regulator of chromatin subfamily B member 1	SMARCB1	22.7224	23.3327	23.5845	23.2132	23.5932	21.0781	22.8442	22.5052	0.448047	-0.708033
Q12846	Q12846	Syntaxin-4	STX4	20.8754	21.2782	19.5122	20.5553	20.5237	20.5065	20.784	20.6047	0.935182	0.0494667
Q12849	Q12849	G-rich sequence factor 1	GRSF1	23.6571	24.3904	24.4192	24.1556	24.5136	24.6804	23.9798	24.3913	0.511739	0.2357
Q12874	Q12874	Splicing factor 3A subunit 3	SF3A3	25.4588	26.0791	25.9248	25.8209	25.9341	25.6871	25.2264	25.6159	0.50341	-0.205033
Q12888	Q12888	TP53-binding protein 1	TP53BP1	16.6631	15.7517	16.3524	16.2557	17.4654	17.9219	15.68	17.0224	0.383811	0.7667
Q12899	Q12899	Tripartite motif-containing protein 26	TRIM26	19.1304	19.4644	19.5832	19.3927	18.998	18.2598	18.3512	18.5363	0.0452823	-0.856333
Q12904	Q12904	Aminoacyl tRNA synthase complex-interacting multifunctional protein 1;Endothelial monocyte-activating polypeptide 2	AIMP1	22.9614	23.9118	23.3161	23.3964	23.415	23.812	23.887	23.7047	0.397347	0.308233
Q12905	Q12905	Interleukin enhancer-binding factor 2	ILF2	25.7903	26.2287	26.331	26.1167	26.2928	26.0838	25.8211	26.0659	0.825153	-0.0507667
Q12906;Q96SI9	Q12906	Interleukin enhancer-binding factor 3	ILF3	26.0295	26.4033	26.3926	26.2751	26.5738	26.5637	26.284	26.4738	0.273901	0.1987
Q12907	Q12907	Vesicular integral-membrane protein VIP36	LMAN2	23.8845	21.7166	21.8125	22.4712	22.6198	22.4689	23.7598	22.9495	0.596694	0.4783
Q12931	Q12931	Heat shock protein 75 kDa, mitochondrial	TRAP1	22.0388	21.7281	21.8068	21.8579	22.4383	21.8017	22.0423	22.0941	0.339333	0.2362
Q12933	Q12933	TNF receptor-associated factor 2	TRAF2	16.9894	15.3491	19.3405	17.2263	19.1325	19.2538	16.4138	18.2667	0.523549	1.04037
Q12959	Q12959	Disks large homolog 1	DLG1	19.6352	21.1679	19.9772	20.2601	20.1002	20.7727	20.2846	20.3858	0.821309	0.125733
Q12972	Q12972	Nuclear inhibitor of protein phosphatase 1;Activator of RNA decay	PPP1R8	20.5001	20.7787	20.7502	20.6763	20.6601	21.0484	20.6862	20.7982	0.475954	0.1219
Q12996	Q12996	Cleavage stimulation factor subunit 3	CSTF3	22.3829	22.688	22.3794	22.4834	22.5058	22.3721	22.5797	22.4859	0.984872	0.00243333
Q13011	Q13011	Delta(3,5)-Delta(2,4)-dienoyl-CoA isomerase, mitochondrial	ECH1	23.5969	24.0137	23.2311	23.6139	23.8188	23.7415	23.4088	23.6564	0.879647	0.0424667
Q13045	Q13045	Protein flightless-1 homolog	FLII	19.9239	20.1936	20.5311	20.2162	20.0928	19.1247	20.0758	19.7644	0.301108	-0.451767
Q13049	Q13049	E3 ubiquitin-protein ligase TRIM32	TRIM32	20.5092	21.1818	21.2585	20.9832	21.5274	20.749	20.6574	20.9779	0.989245	-0.00523333
Q13084	Q13084	Large ribosomal subunit protein bL28m	MRPL28	18.984	18.0231	18.7311	18.5794	18.4293	20.0344	19.1438	19.2025	0.329092	0.6231
Q13085;O00763	Q13085;O00763	Acetyl-CoA carboxylase 1;Acetyl-CoA carboxylase 2	ACACA;ACACB	18.1426	18.7731	17.3841	18.0999	18.6554	17.7586	18.1977	18.2039	0.840091	0.103967
Q13103	Q13103	Secreted phosphoprotein 24	SPP2	16.536	18.1201	17.2887	17.3149	17.9767	21.1063	16.8709	18.6513	0.407278	1.33637
Q13123	Q13123	Protein Red	IK	21.5598	21.5841	21.6049	21.5829	22.1314	21.9048	21.1792	21.7385	0.642495	0.155533
Q13131;P54646	Q13131;P54646	5-AMP-activated protein kinase catalytic subunit alpha-1;5-AMP-activated protein kinase catalytic subunit alpha-2	PRKAA1;PRKAA2	20.0895	20.3534	20.4926	20.3118	20.2759	20.9025	20.0027	20.3937	0.798489	0.0818667
Q13137	Q13137	Calcium-binding and coiled-coil domain-containing protein 2	CALCOCO2	20.9445	21.1494	21.6154	21.2364	21.4212	21.3614	20.3149	21.0325	0.652201	-0.203933
Q13144	Q13144	Translation initiation factor eIF2B subunit epsilon	EIF2B5	22.6262	23.2279	22.5928	22.8156	22.9337	21.9837	22.1321	22.3498	0.272952	-0.4658
Q13148	Q13148	TAR DNA-binding protein 43	TARDBP	25.8019	26.709	26.676	26.3956	26.8833	26.7628	26.1654	26.6038	0.606687	0.2082
Q13151	Q13151	Heterogeneous nuclear ribonucleoprotein A0	HNRNPA0	25.6581	26.8434	26.4973	26.3329	26.7259	26.3662	25.7053	26.2658	0.891596	-0.0671333
Q13155	Q13155	Aminoacyl tRNA synthase complex-interacting multifunctional protein 2	AIMP2	22.9053	23.0525	22.8692	22.9423	22.9345	23.1546	22.0789	22.7227	0.573829	-0.219667
Q13162	Q13162	Peroxiredoxin-4	PRDX4	21.1038	22.296	22.2669	21.8889	22.2731	20.8599	19.7925	20.9752	0.343428	-0.913733
Q13185	Q13185	Chromobox protein homolog 3	CBX3	27.7867	28.3227	28.1269	28.0788	27.9398	28.1975	27.5034	27.8802	0.483955	-0.198533
Q13200	Q13200	26S proteasome non-ATPase regulatory subunit 2	PSMD2	22.965	23.4864	23.1216	23.191	23.2594	23.5961	23.0979	23.3178	0.583868	0.1268
Q13206	Q13206	Probable ATP-dependent RNA helicase DDX10	DDX10	19.5182	19.4031	19.9426	19.6213	19.1112	20.4124	20.27	19.9312	0.541645	0.3099
Q13217	Q13217	DnaJ homolog subfamily C member 3	DNAJC3	18.8352	20.1601	17.4058	18.8004	18.4213	18.862	18.9302	18.7378	0.9451	-0.0625333
Q13242	Q13242	Serine/arginine-rich splicing factor 9	SRSF9	25.6565	26.4589	26.1508	26.0887	26.2121	26.4349	25.8006	26.1492	0.849862	0.0604667
Q13243	Q13243	Serine/arginine-rich splicing factor 5	SRSF5	24.8958	25.5548	25.4925	25.3144	25.6361	25.4197	24.9035	25.3198	0.986602	0.0054
Q13247	Q13247	Serine/arginine-rich splicing factor 6	SRSF6	26.8683	27.2894	27.0242	27.0606	27.1161	27.0539	26.7584	26.9761	0.636191	-0.0845
Q13257	Q13257	Mitotic spindle assembly checkpoint protein MAD2A	MAD2L1	21.4505	22.342	21.7182	21.8369	21.7737	21.6922	21.0052	21.4904	0.389849	-0.346533
Q13263	Q13263	Transcription intermediary factor 1-beta	TRIM28	24.5066	24.4673	24.746	24.5733	24.8828	24.5364	24.4137	24.611	0.832965	0.0376667
Q13268	Q13268	Dehydrogenase/reductase SDR family member 2, mitochondrial	DHRS2	27.6222	28.0772	28.1278	27.9424	27.6899	28.0596	27.6383	27.7959	0.522305	-0.146467
Q13277	Q13277	Syntaxin-3	STX3	21.7188	21.648	22.3783	21.915	22.187	21.756	22.6269	22.19	0.467327	0.274933
Q13283	Q13283	Ras GTPase-activating protein-binding protein 1	G3BP1	26.2115	26.5808	26.7154	26.5026	26.6525	26.5353	25.6349	26.2742	0.56827	-0.228333
Q13286	Q13286	Battenin	CLN3	15.7653	17.8187	17.9	17.1613	17.2545	20.4276	20.0065	19.2295	0.172297	2.0682
Q13308	Q13308	Inactive tyrosine-protein kinase 7	PTK7	17.6905	16.5962	17.1575	17.1481	18.8884	16.8032	18.0262	17.9059	0.347421	0.757867
Q13310;P0CB38	Q13310	Polyadenylate-binding protein 4	PABPC4	25.3876	25.3978	25.4368	25.4074	25.8071	25.6158	24.8526	25.4252	0.956982	0.0177667
Q13347	Q13347	Eukaryotic translation initiation factor 3 subunit I	EIF3I	25.8753	26.6503	26.2974	26.2743	26.1648	25.919	25.4629	25.8489	0.234855	-0.425433
Q13362	Q13362	Serine/threonine-protein phosphatase 2A 56 kDa regulatory subunit gamma isoform	PPP2R5C	18.3838	17.2847	18.8363	18.1683	18.7628	18.4884	18.3287	18.5266	0.522415	0.358367
Q13363	Q13363	C-terminal-binding protein 1	CTBP1	22.2985	23.4121	21.9121	22.5409	22.9632	21.8171	21.7718	22.184	0.581647	-0.356867
Q13405	Q13405	Large ribosomal subunit protein mL49	MRPL49	23.6782	24.4599	24.1263	24.0881	24.1632	24.3076	23.7311	24.0673	0.945483	-0.0208333
Q13409	Q13409	Cytoplasmic dynein 1 intermediate chain 2	DYNC1I2	21.4558	21.3628	21.9698	21.5961	22.1237	21.8426	21.5797	21.8487	0.363654	0.252533
Q13416	Q13416	Origin recognition complex subunit 2	ORC2	18.3882	19.4781	19.1281	18.9981	19.2048	19.291	19.3403	19.2787	0.475118	0.280567
Q13418	Q13418	Integrin-linked protein kinase	ILK	21.9463	20.8466	22.4194	21.7374	21.2357	22.0824	21.5142	21.6108	0.825698	-0.126667
Q13423	Q13423	NAD(P) transhydrogenase, mitochondrial	NNT	22.684	19.494	20.3975	20.8585	20.1005	18.0406	22.8988	20.3466	0.780078	-0.511867
Q13425	Q13425	Beta-2-syntrophin	SNTB2	20.3351	20.3027	19.9935	20.2104	20.0942	19.909	19.9763	19.9932	0.174039	-0.217267
Q13427	Q13427	Peptidyl-prolyl cis-trans isomerase G	PPIG	20.7192	21.9222	21.2722	21.3045	21.4855	21.4735	20.9989	21.3193	0.971802	0.0147667
Q13428	Q13428	Treacle protein	TCOF1	21.8474	22.6317	22.3955	22.2915	22.9208	23.2605	22.7538	22.9784	0.0785002	0.686833
Q13435	Q13435	Splicing factor 3B subunit 2	SF3B2	24.0642	24.7602	24.881	24.5685	24.3286	24.8219	24.4115	24.5207	0.881461	-0.0478
Q13438	Q13438	Protein OS-9	OS9	16.4202	17.5373	16.5798	16.8458	15.8241	16.3931	17.5581	16.5918	0.704816	-0.254
Q13439	Q13439	Golgin subfamily A member 4	GOLGA4	16.7202	17.2196	17.2807	17.0735	17.5177	17.3093	16.581	17.136	0.862668	0.0625
Q13443	Q13443	Disintegrin and metalloproteinase domain-containing protein 9	ADAM9	20.3337	18.834	19.1237	19.4305	17.9813	18.5071	20.1288	18.8724	0.524251	-0.558067
Q13445	Q13445	Transmembrane emp24 domain-containing protein 1	TMED1	21.5966	16.7354	16.9425	18.4248	15.3454	14.8024	21.2767	17.1415	0.650491	-1.28333
Q13488	Q13488	V-type proton ATPase 116 kDa subunit a 3	TCIRG1	19.7052	17.5733	18.4541	18.5775	18.4323	19.0836	19.0727	18.8629	0.698164	0.285333
Q13492	Q13492	Phosphatidylinositol-binding clathrin assembly protein	PICALM	19.0896	19.4628	19.3048	19.2857	19.4843	19.7333	18.7762	19.3313	0.892789	0.0455333
Q13501	Q13501	Sequestosome-1	SQSTM1	25.2849	26.0139	25.7566	25.6851	25.5347	25.5122	24.9252	25.324	0.284413	-0.3611
Q13505	Q13505	Metaxin-1	MTX1	18.7314	18.8043	18.7845	18.7734	18.3242	19.8649	19.9627	19.3839	0.368873	0.610533
Q13506;Q15742	Q13506;Q15742	NGFI-A-binding protein 1;NGFI-A-binding protein 2	NAB1;NAB2	18.2342	19.7507	19.5446	19.1765	20.0754	19.3927	19.2448	19.571	0.516424	0.394467
Q13509	Q13509	Tubulin beta-3 chain	TUBB3	18.1725	16.9338	18.8912	17.9992	16.3383	17.4972	17.8513	17.2289	0.354617	-0.770233
Q13523	Q13523	Serine/threonine-protein kinase PRP4 homolog	PRPF4B	18.1716	18.5593	18.4599	18.3969	18.2865	19.0947	19.077	18.8194	0.250519	0.422467
Q13547;O15379	Q13547	Histone deacetylase 1	HDAC1	24.2845	24.8907	24.389	24.5214	24.5828	24.4686	24.0133	24.3549	0.550298	-0.1665
Q13555	Q13555	Calcium/calmodulin-dependent protein kinase type II subunit gamma	CAMK2G	21.0721	19.7946	21.2505	20.7057	21.2352	20.2785	21.2978	20.9372	0.704969	0.231433
Q13557;Q13554;Q9UQM7	Q13557	Calcium/calmodulin-dependent protein kinase type II subunit delta	CAMK2D	24.1638	24.5308	24.0775	24.2574	24.802	24.4288	24.0699	24.4336	0.530028	0.1762
Q13561	Q13561	Dynactin subunit 2	DCTN2	24.334	25.185	25.2334	24.9175	25.3068	25.1421	24.5826	25.0105	0.812387	0.0930333
Q13573	Q13573	SNW domain-containing protein 1	SNW1	21.1552	21.8035	21.9782	21.6456	21.8931	21.7726	21.1421	21.6026	0.905943	-0.0430333
Q13586	Q13586	Stromal interaction molecule 1	STIM1	17.0457	16.3125	17.3974	16.9185	17.0274	15.2374	17.8223	16.6957	0.807328	-0.222833
Q13595	Q13595	Transformer-2 protein homolog alpha	TRA2A	25.1878	25.7904	25.3776	25.4519	25.9092	25.8813	24.9936	25.5947	0.708249	0.142767
Q13601	Q13601	KRR1 small subunit processome component homolog	KRR1	20.2757	19.8362	21.4824	20.5314	20.7658	20.991	20.8837	20.8802	0.55296	0.348733
Q13610	Q13610	Periodic tryptophan protein 1 homolog	PWP1	21.9211	21.6588	21.206	21.5953	21.0303	21.8855	21.6151	21.5103	0.808504	-0.085
Q13617	Q13617	Cullin-2	CUL2	20.1113	19.8883	19.1403	19.7133	20.5569	19.8863	19.8475	20.0969	0.365117	0.3836
Q13618	Q13618	Cullin-3	CUL3	18.7299	16.9289	17.9189	17.8592	16.8019	18.027	18.068	17.6323	0.75129	-0.226933
Q13619	Q13619	Cullin-4A	CUL4A	21.3708	21.88	21.9112	21.7207	21.8602	21.7162	21.8832	21.8199	0.634414	0.0992
Q13636;Q9UL26	Q13636;Q9UL26	Ras-related protein Rab-31;Ras-related protein Rab-22A	RAB31;RAB22A	21.5534	17.8191	16.3098	18.5608	17.5102	20.4498	21.5633	19.8411	0.553701	1.28033
Q13637;O14966;P57729	Q13637	Ras-related protein Rab-32	RAB32	18.244	20.3784	19.7541	19.4588	20.3692	20.2708	20.6609	20.4336	0.261761	0.9748
Q13641	Q13641	Trophoblast glycoprotein	TPBG	20.1294	20.3177	18.878	19.775	20.1741	18.7614	20.5952	19.8436	0.928459	0.0685333
Q13724	Q13724	Mannosyl-oligosaccharide glucosidase	MOGS	22.8849	22.0128	22.2595	22.3857	21.5034	20.8805	22.3106	21.5648	0.181632	-0.8209
Q13740	Q13740	CD166 antigen	ALCAM	25.5884	25.6343	25.0677	25.4301	25.2757	24.9177	25.4001	25.1978	0.376385	-0.2323
Q13751	Q13751	Laminin subunit beta-3	LAMB3	18.5973	19.1806	19.391	19.0563	18.9766	19.1029	18.6558	18.9118	0.630612	-0.144533
Q13753	Q13753	Laminin subunit gamma-2	LAMC2	18.3581	19.1185	18.3912	18.6226	19.0381	19.1037	18.7964	18.9794	0.285313	0.3568
Q13769	Q13769	THO complex subunit 5 homolog	THOC5	16.7471	18.576	16.9123	17.4118	18.325	17.7984	18.3819	18.1684	0.324111	0.756633
Q13813	Q13813	Spectrin alpha chain, non-erythrocytic 1	SPTAN1	22.4128	23.7103	23.5939	23.239	23.8991	23.5245	22.5933	23.339	0.868852	0.0999667
Q13823	Q13823	Nucleolar GTP-binding protein 2	GNL2	19.1725	19.3136	19.5365	19.3409	19.6305	20.0699	20.0122	19.9042	0.0347485	0.563333
Q13838	Q13838	Spliceosome RNA helicase DDX39B	DDX39B	26.7303	27.342	27.3981	27.1568	27.4734	27.1134	26.8525	27.1464	0.972243	-0.0103667
Q13868	Q13868	Exosome complex component RRP4	EXOSC2	24.4601	24.9478	24.4901	24.6327	24.8119	24.7238	24.129	24.5549	0.785974	-0.0777667
Q6P1K8;Q13888	Q6P1K8;Q13888	General transcription factor IIH subunit 2-like protein;General transcription factor IIH subunit 2	GTF2H2C;GTF2H2	19.6142	19.1414	17.5547	18.7701	18.4567	18.3787	19.4178	18.7511	0.980175	-0.0190333
Q13895	Q13895	Bystin	BYSL	21.141	21.109	21.5908	21.2803	21.1708	21.2293	20.9474	21.1158	0.420681	-0.164433
Q14008	Q14008	Cytoskeleton-associated protein 5	CKAP5	20.4847	19.207	19.2892	19.6603	19.9324	19.6552	21.1945	20.2607	0.394389	0.6004
Q14011	Q14011	Cold-inducible RNA-binding protein	CIRBP	23.2305	24.3556	21.7545	23.1135	21.2586	22.3271	21.4517	21.6791	0.188026	-1.4344
Q14103	Q14103	Heterogeneous nuclear ribonucleoprotein D0	HNRNPD	28.0146	28.0217	28.3286	28.1216	28.5559	28.7086	28.0417	28.4354	0.260813	0.313767
Q14108	Q14108	Lysosome membrane protein 2	SCARB2	23.7434	23.0552	23.3061	23.3682	23.4032	23.1951	23.7082	23.4355	0.802458	0.0672667
Q14118	Q14118	Dystroglycan 1;Alpha-dystroglycan;Beta-dystroglycan	DAG1	19.0902	18.9404	19.2661	19.0989	19.2363	18.528	19.3234	19.0292	0.815048	-0.0696667
Q14126	Q14126	Desmoglein-2	DSG2	17.3109	17.371	17.9117	17.5312	17.2429	17.1289	17.5264	17.2994	0.37106	-0.2318
Q14137	Q14137	Ribosome biogenesis protein BOP1	BOP1	23.9786	24.1082	24.4101	24.1656	24.4974	24.4118	24.1271	24.3454	0.350592	0.1798
Q14146	Q14146	Unhealthy ribosome biogenesis protein 2 homolog	URB2	14.7215	16.4896	16.7167	15.9759	17.8635	18.312	16.8013	17.6589	0.102587	1.683
Q14151	Q14151	Scaffold attachment factor B2	SAFB2	18.4319	17.5585	18.2631	18.0845	18.3355	15.1694	17.2383	16.9144	0.334258	-1.1701
Q14152	Q14152	Eukaryotic translation initiation factor 3 subunit A	EIF3A	24.9569	24.9355	24.7228	24.8717	24.5671	24.5287	24.6357	24.5772	0.0430755	-0.294567
Q14155	Q14155	Rho guanine nucleotide exchange factor 7	ARHGEF7	17.6335	17.7632	17.8822	17.7596	17.3843	17.4864	19.2142	18.0283	0.696124	0.268667
Q14157	Q14157	Ubiquitin-associated protein 2-like	UBAP2L	23.0675	23.2883	23.1018	23.1525	22.9517	23.3116	22.4256	22.8963	0.426415	-0.256233
Q14160	Q14160	Protein scribble homolog	SCRIB	21.0962	20.3578	20.8988	20.7843	21.3132	21.6643	21.3905	21.456	0.0744837	0.671733
Q14165	Q14165	Malectin	MLEC	23.9417	22.8057	22.6038	23.1171	23.0394	22.3235	23.6827	23.0152	0.867401	-0.101867
Q14192	Q14192	Four and a half LIM domains protein 2	FHL2	25.2883	26.0143	25.6687	25.6571	25.6199	25.8213	25.1712	25.5375	0.695766	-0.119633
Q14197	Q14197	Large ribosomal subunit protein mL62	MRPL58	18.0312	16.3977	17.6227	17.3505	17.4615	20.1418	16.7907	18.1313	0.543002	0.7808
Q14202	Q14202	Zinc finger MYM-type protein 3	ZMYM3	17.7618	17.0715	17.2126	17.3486	18.5159	18.1295	16.4261	17.6905	0.65517	0.341867
Q14203	Q14203	Dynactin subunit 1	DCTN1	21.919	22.5798	22.4286	22.3091	21.9777	21.692	21.6992	21.7896	0.104926	-0.5195
Q14232	Q14232	Translation initiation factor eIF2B subunit alpha	EIF2B1	21.7949	21.9674	21.132	21.6314	21.8181	21.8052	21.7699	21.7977	0.580919	0.1663
Q14240	Q14240	Eukaryotic initiation factor 4A-II	EIF4A2	22.2035	21.6082	20.8575	21.5564	22.9665	20.732	21.8678	21.8554	0.715855	0.299033
Q14241	Q14241	Elongin-A	ELOA	15.1814	14.9615	16.4929	15.5453	15.9909	17.297	16.1138	16.4672	0.220841	0.921967
Q14247	Q14247	Src substrate cortactin	CTTN	23.8075	24.6739	24.2501	24.2438	24.4084	24.5758	23.8493	24.2778	0.92364	0.034
Q14254	Q14254	Flotillin-2	FLOT2	21.5786	20.2543	18.9027	20.2452	18.4108	18.1304	20.5171	19.0194	0.319393	-1.22577
Q14257	Q14257	Reticulocalbin-2	RCN2	22.8028	23.333	23.178	23.1046	22.6617	22.1099	21.7497	22.1738	0.051208	-0.930833
Q14258	Q14258	E3 ubiquitin/ISG15 ligase TRIM25	TRIM25	24.429	24.4556	24.3914	24.4253	24.598	24.1044	23.9338	24.2121	0.396352	-0.213267
Q14315	Q14315	Filamin-C	FLNC	23.5549	24.9882	24.7563	24.4331	24.8566	24.5613	24.034	24.484	0.926039	0.0508333
Q14318	Q14318	Peptidyl-prolyl cis-trans isomerase FKBP8	FKBP8	19.6619	19.4112	20.9441	20.0057	19.6623	19.1843	21.1414	19.996	0.990378	-0.00973333
Q14320;Q9Y247	Q14320	Protein FAM50A	FAM50A	21.9398	22.2136	22.9263	22.3599	22.4988	22.5695	22.145	22.4044	0.899447	0.0445333
Q14331	Q14331	Protein FRG1	FRG1	22.4158	22.8265	22.1995	22.4806	22.306	21.4756	19.8923	21.2246	0.213088	-1.25597
Q14344	Q14344	Guanine nucleotide-binding protein subunit alpha-13	GNA13	20.8663	21.3778	21.1822	21.1421	21.4867	20.5877	21.0823	21.0522	0.782749	-0.0898667
Q14444	Q14444	Caprin-1	CAPRIN1	25.1618	25.6121	25.8774	25.5504	26.0517	25.9674	25.5054	25.8415	0.342739	0.291067
Q14498;Q86U06	Q14498	RNA-binding protein 39	RBM39	24.927	25.9319	26.0689	25.6426	24.7971	25.3537	24.6278	24.9262	0.179277	-0.7164
Q14527	Q14527	Helicase-like transcription factor	HLTF	17.0732	17.5467	15.7626	16.7942	17.0281	15.8706	16.2386	16.3791	0.553947	-0.415067
Q14554	Q14554	Protein disulfide-isomerase A5	PDIA5	22.6287	22.4958	22.9539	22.6928	22.7081	22.9097	22.6224	22.7467	0.756794	0.0539333
Q14558	Q14558	Phosphoribosyl pyrophosphate synthase-associated protein 1	PRPSAP1	19.536	17.2542	16.9642	17.9181	15.9651	16.0172	17.0184	16.3336	0.180983	-1.58457
Q14562	Q14562	ATP-dependent RNA helicase DHX8	DHX8	16.4261	16.6235	18.2217	17.0904	16.4213	17.2738	16.4718	16.7223	0.60251	-0.368133
Q14566	Q14566	DNA replication licensing factor MCM6	MCM6	25.3186	25.8635	25.6481	25.6101	25.4422	25.5575	25.3572	25.4523	0.43026	-0.157767
Q14573;Q14643	Q14573	Inositol 1,4,5-trisphosphate receptor type 3	ITPR3	15.8161	17.722	16.9951	16.8444	15.7184	16.0463	14.9746	15.5798	0.137209	-1.26463
Q14669	Q14669	E3 ubiquitin-protein ligase TRIP12	TRIP12	16.3186	17.246	15.1017	16.2221	17.2229	16.3659	16.5289	16.7059	0.530172	0.4838
Q14671	Q14671	Pumilio homolog 1	PUM1	19.4268	19.5762	19.0301	19.3444	16.8959	19.4326	19.0378	18.4554	0.376625	-0.888933
Q14676	Q14676	Mediator of DNA damage checkpoint protein 1	MDC1	15.1819	18.7429	17.916	17.2803	19.214	15.2333	17.3293	17.2589	0.98981	-0.0214
Q14677	Q14677	Clathrin interactor 1	CLINT1	22.8072	23.2775	23.0784	23.0544	23.634	23.1577	22.7051	23.1656	0.736363	0.111233
Q14683	Q14683	Structural maintenance of chromosomes protein 1A	SMC1A	21.8338	20.7047	21.1708	21.2364	21.8213	21.5764	22.092	21.8299	0.204353	0.593467
Q14684	Q14684	Ribosomal RNA processing protein 1 homolog B	RRP1B	21.1795	20.7667	20.5194	20.8219	21.0137	21.3271	21.4053	21.2487	0.146705	0.426833
Q14690	Q14690	Protein RRP5 homolog	PDCD11	22.365	22.5376	21.9785	22.2937	22.8913	22.2096	22.7336	22.6115	0.298149	0.3178
Q14692	Q14692	Ribosome biogenesis protein BMS1 homolog	BMS1	22.1297	21.6986	21.9228	21.917	21.9893	22.9085	22.6447	22.5142	0.147532	0.597133
Q14694	Q14694	Ubiquitin carboxyl-terminal hydrolase 10	USP10	21.5574	22.1987	22.1438	21.9666	22.3884	22.5847	21.4403	22.1378	0.701738	0.171167
Q14697	Q14697	Neutral alpha-glucosidase AB	GANAB	21.2955	21.3984	20.9134	21.2024	21.6794	20.9833	21.4777	21.3801	0.526565	0.1777
Q14699	Q14699	Raftlin	RFTN1	18.5329	19.1829	20.9107	19.5422	21.3402	17.902	18.7644	19.3355	0.877987	-0.206633
Q14739	Q14739	Delta(14)-sterol reductase LBR	LBR	20.9352	17.9593	17.5056	18.8	17.2305	17.6929	20.8751	18.5995	0.904636	-0.200533
Q14764	Q14764	Major vault protein	MVP	22.883	23.6754	23.4962	23.3515	23.1448	22.9966	22.8031	22.9815	0.259965	-0.370033
Q147X3	Q147X3	N-alpha-acetyltransferase 30	NAA30	18.5028	17.3163	17.1404	17.6532	18.7704	17.0497	16.9805	17.6002	0.945582	-0.0529667
Q14807	Q14807	Kinesin-like protein KIF22	KIF22	20.683	21.3574	21.487	21.1758	21.5322	20.3663	19.1428	20.3471	0.354762	-0.8287
Q14839;Q8TDI0;Q12873	Q14839	Chromodomain-helicase-DNA-binding protein 4	CHD4	18.136	17.247	19.3774	18.2535	18.0848	19.014	20.0476	19.0488	0.396924	0.795333
Q14966	Q14966	Zinc finger protein 638	ZNF638	16.0291	19.1107	17.157	17.4323	16.2647	16.2408	15.9919	16.1658	0.294255	-1.26647
Q14974	Q14974	Importin subunit beta-1	KPNB1	24.3828	24.8041	24.6691	24.6187	24.7796	24.8335	24.7286	24.7806	0.321231	0.1619
Q14978	Q14978	Nucleolar and coiled-body phosphoprotein 1	NOLC1	23.9689	24.1188	23.9412	24.0096	23.8415	24.2298	23.5943	23.8885	0.585866	-0.1211
Q14980	Q14980	Nuclear mitotic apparatus protein 1	NUMA1	22.2443	22.1901	22.4095	22.2813	22.9891	22.904	22.9307	22.9413	0.00474506	0.659967
Q14997	Q14997	Proteasome activator complex subunit 4	PSME4	16.3007	17.1464	18.0281	17.1584	15.985	17.268	18.5837	17.2789	0.900961	0.1205
Q14BN4	Q14BN4	Sarcolemmal membrane-associated protein	SLMAP	16.6705	17.1065	17.3686	17.0485	17.3925	16.2827	17.4133	17.0295	0.967042	-0.0190333
Q14C86	Q14C86	GTPase-activating protein and VPS9 domain-containing protein 1	GAPVD1	17.6918	17.5913	17.8433	17.7088	17.6497	17.2031	17.4041	17.419	0.14112	-0.289833
Q15003	Q15003	Condensin complex subunit 2	NCAPH	23.2026	23.8071	24.099	23.7029	23.6047	23.6389	23.167	23.4702	0.497323	-0.2327
Q15005	Q15005	Signal peptidase complex subunit 2	SPCS2	23.2845	19.8141	20.8902	21.3296	21.0783	20.6262	21.5686	21.091	0.840686	-0.238567
Q15006	Q15006	ER membrane protein complex subunit 2	EMC2	21.0227	22.4145	22.7004	22.0459	21.6663	22.3074	22.067	22.0136	0.957588	-0.0323
Q15007	Q15007	Pre-mRNA-splicing regulator WTAP	WTAP	22.4799	22.7818	22.6879	22.6499	20.7825	23.0166	22.3438	22.0476	0.459391	-0.602233
Q15008	Q15008	26S proteasome non-ATPase regulatory subunit 6	PSMD6	20.6117	22.8135	21.9519	21.7924	22.4389	22.234	21.3658	22.0129	0.779522	0.220533
Q15019	Q15019	Septin-2	SEPTIN2	25.488	26.153	25.837	25.826	25.95	26.0305	25.3735	25.7847	0.890708	-0.0413333
Q15020	Q15020	Squamous cell carcinoma antigen recognized by T-cells 3	SART3	21.0765	21.056	20.9058	21.0128	20.363	21.2026	21.2336	20.9331	0.807839	-0.0797
Q15021	Q15021	Condensin complex subunit 1	NCAPD2	22.5738	22.8924	22.1198	22.5287	22.3454	21.8765	22.5905	22.2708	0.448135	-0.257867
Q15022	Q15022	Polycomb protein SUZ12	SUZ12	16.8519	18.6466	16.4956	17.3314	17.8622	16.8688	16.9391	17.2234	0.893378	-0.108
Q15024	Q15024	Exosome complex component RRP42	EXOSC7	23.057	23.7965	23.335	23.3962	23.019	23.5447	23.1496	23.2378	0.588125	-0.1584
Q15029	Q15029	116 kDa U5 small nuclear ribonucleoprotein component	EFTUD2	25.1909	25.6644	25.6727	25.5093	25.9483	25.5088	25.2627	25.5733	0.815728	0.0639333
Q15031	Q15031	Leucine--tRNA ligase, mitochondrial	LARS2	16.9248	17.8527	17.8051	17.5275	17.82	18.7223	18.4485	18.3303	0.118184	0.802733
Q15042	Q15042	Rab3 GTPase-activating protein catalytic subunit	RAB3GAP1	17.6322	17.9829	17.7632	17.7928	17.2575	18.1976	17.0254	17.4935	0.495869	-0.299267
Q15043	Q15043	Metal cation symporter ZIP14	SLC39A14	23.447	18.7904	21.61	21.2825	22.2068	21.0724	22.2681	21.8491	0.721532	0.566633
Q15046	Q15046	Lysine--tRNA ligase	KARS1	22.8297	22.7836	23.2106	22.9413	23.3354	22.9873	22.7952	23.0393	0.662766	0.098
Q15050	Q15050	Ribosome biogenesis regulatory protein homolog	RRS1	25.021	25.8646	25.6298	25.5051	25.5391	25.1495	24.6107	25.0998	0.333088	-0.405367
Q15061	Q15061	WD repeat-containing protein 43	WDR43	22.7394	23.4242	23.5843	23.2493	23.7461	23.3352	23.7065	23.5959	0.319329	0.346633
Q15070	Q15070	Mitochondrial inner membrane protein OXA1L	OXA1L	22.4953	18.8042	18.4604	19.92	16.6203	17.747	22.168	18.8451	0.641997	-1.07487
Q15084	Q15084	Protein disulfide-isomerase A6	PDIA6	27.2061	27.7931	27.7544	27.5845	28.1632	27.8491	27.335	27.7824	0.556031	0.1979
Q15125	Q15125	3-beta-hydroxysteroid-Delta(8),Delta(7)-isomerase	EBP	23.6022	15.8238	17.0896	18.8385	17.4477	15.1631	23.3601	18.657	0.960333	-0.181567
Q15149;P58107	Q15149	Plectin	PLEC	23.9879	24.9537	24.9078	24.6165	25.1441	24.3857	23.7649	24.4316	0.73521	-0.1849
Q15155;Q5JPE7;P69849	Q15155;Q5JPE7;P69849	BOS complex subunit NOMO1;BOS complex subunit NOMO2;BOS complex subunit NOMO3	NOMO1;NOMO2;NOMO3	21.8038	22.3703	22.3832	22.1858	21.6157	22.225	22.0067	21.9491	0.416519	-0.236633
Q15165	Q15165	Serum paraoxonase/arylesterase 2	PON2	20.3352	20.5783	19.6967	20.2034	20.8539	20.6171	20.305	20.592	0.288064	0.3886
Q15181	Q15181	Inorganic pyrophosphatase	PPA1	20.2041	20.7502	20.8328	20.5957	20.9303	21.0768	20.3534	20.7868	0.554151	0.191133
Q15185	Q15185	Prostaglandin E synthase 3	PTGES3	24.3933	24.5536	24.0189	24.3219	23.3762	24.5051	24.1744	24.0186	0.475866	-0.303367
Q15233	Q15233	Non-POU domain-containing octamer-binding protein	NONO	27.056	27.5163	27.5596	27.3773	27.538	27.616	27.3353	27.4964	0.558474	0.119133
Q15269	Q15269	Periodic tryptophan protein 2 homolog	PWP2	22.1771	22.6334	22.707	22.5058	22.5692	22.3213	22.2957	22.3954	0.596515	-0.110433
Q15286	Q15286	Ras-related protein Rab-35	RAB35	21.4963	20.294	20.6126	20.801	20.4936	20.4806	20.9282	20.6341	0.700111	-0.166833
Q15287	Q15287	RNA-binding protein with serine-rich domain 1	RNPS1	25.2218	25.7129	25.6999	25.5449	25.8859	25.6247	24.8486	25.4531	0.810539	-0.0918
Q15291	Q15291	Retinoblastoma-binding protein 5	RBBP5	22.7162	22.3493	22.5373	22.5343	23.0581	23.2406	22.3516	22.8834	0.3282	0.349167
Q15293	Q15293	Reticulocalbin-1	RCN1	21.5437	22.3853	20.4402	21.4564	22.21	21.5126	20.6927	21.4718	0.983914	0.0153667
Q15361	Q15361	Transcription termination factor 1	TTF1	16.6215	17.0529	16.5804	16.7516	14.7406	16.7132	16.8494	16.1011	0.442037	-0.650533
Q15363	Q15363	Transmembrane emp24 domain-containing protein 2	TMED2	20.6731	20.6416	21.0873	20.8007	19.7695	21.5277	21.4279	20.9084	0.869847	0.1077
Q15365;P57723	Q15365	Poly(rC)-binding protein 1	PCBP1	25.6814	26.0103	25.771	25.8209	26.1003	26.1925	25.6755	25.9894	0.427953	0.168533
Q15366;P57721	Q15366	Poly(rC)-binding protein 2	PCBP2	25.5176	25.7759	25.4299	25.5745	25.7334	25.511	25.3704	25.5383	0.819	-0.0362
Q15369	Q15369	Elongin-C	ELOC	23.1391	23.5281	22.9463	23.2045	23.5239	22.9861	23.2766	23.2622	0.815284	0.0577
Q15370	Q15370	Elongin-B	ELOB	22.6255	22.8369	22.9889	22.8171	23.3015	23.9563	23.7289	23.6622	0.0289032	0.845133
Q15392	Q15392	Delta(24)-sterol reductase	DHCR24	23.8757	22.3026	22.4159	22.8647	22.7035	21.7725	24.1524	22.8761	0.99009	0.0114
Q15393	Q15393	Splicing factor 3B subunit 3	SF3B3	25.8001	26.4082	26.0087	26.0723	25.882	26.0336	25.6343	25.85	0.364222	-0.222367
Q15397	Q15397	Pumilio homolog 3	PUM3	19.1638	20.1888	21.0956	20.1494	20.8502	20.1292	21.2257	20.735	0.426492	0.585633
Q15404	Q15404	Ras suppressor protein 1	RSU1	21.3362	21.9801	21.3215	21.5459	21.1199	21.5858	21.3782	21.3613	0.51727	-0.184633
Q15417;Q99439	Q15417	Calponin-3	CNN3	22.3059	23.4167	22.6458	22.7895	24.0341	23.2871	23.5972	23.6395	0.107549	0.85
Q15424	Q15424	Scaffold attachment factor B1	SAFB	23.2056	23.8686	23.8068	23.627	24.0393	23.6081	23.7201	23.7892	0.555459	0.162167
Q15427	Q15427	Splicing factor 3B subunit 4	SF3B4	22.5091	23.5417	23.4114	23.1541	23.8911	23.5693	22.9638	23.4747	0.492258	0.320667
Q15428	Q15428	Splicing factor 3A subunit 2	SF3A2	22.2348	22.7289	22.5911	22.5183	22.6951	23.752	23.2467	23.2313	0.129737	0.713
Q15434	Q15434	RNA-binding motif, single-stranded-interacting protein 2	RBMS2	23.6885	24.115	23.9273	23.9103	23.404	23.9831	23.6971	23.6947	0.362898	-0.215533
Q15436	Q15436	Protein transport protein Sec23A	SEC23A	19.3145	19.6178	18.9854	19.3059	19.9946	18.6749	17.6182	18.7626	0.516057	-0.543333
Q15459	Q15459	Splicing factor 3A subunit 1	SF3A1	24.3368	25.0248	25.0705	24.8107	25.1076	25.365	24.6689	25.0472	0.4922	0.236467
Q15477	Q15477	Superkiller complex protein 2	SKIC2	17.0497	18.177	17.8238	17.6835	18.1939	16.2963	14.842	16.4441	0.330102	-1.23943
Q15526	Q15526	Surfeit locus protein 1	SURF1	19.4821	16.0977	19.8857	18.4885	16.8684	17.5766	16.6928	17.0459	0.352433	-1.44257
Q15554	Q15554	Telomeric repeat-binding factor 2	TERF2	18.4075	17.0798	17.1154	17.5342	18.9625	18.6022	19.3411	18.9686	0.0624756	1.43437
Q15629	Q15629	Translocating chain-associated membrane protein 1	TRAM1	20.6327	16.4195	17.9063	18.3195	17.4405	18.489	20.2252	18.7182	0.802502	0.398733
Q15631	Q15631	Translin	TSN	22.8877	22.8177	22.375	22.6935	20.5369	22.9803	22.8911	22.1361	0.560444	-0.557367
Q15637	Q15637	Splicing factor 1	SF1	22.2041	23.8383	24.0511	23.3645	24.4393	24.3546	23.3518	24.0486	0.38294	0.684067
Q15642	Q15642	Cdc42-interacting protein 4	TRIP10	17.8773	18.9816	19.1315	18.6635	20.9039	19.2347	19.9349	20.0245	0.0976851	1.36103
Q15646	Q15646	2-5-oligoadenylate synthase-like protein	OASL	18.4882	19.4612	20.3142	19.4212	20.5318	18.2593	17.9507	18.9139	0.632892	-0.507267
Q15648	Q15648	Mediator of RNA polymerase II transcription subunit 1	MED1	16.4833	16.6846	16.2692	16.479	16.8033	16.7406	16.5454	16.6964	0.214317	0.2174
Q15654	Q15654	Thyroid receptor-interacting protein 6	TRIP6	20.1069	21.2187	20.25	20.5252	16.5878	21.1774	19.7175	19.1609	0.421581	-1.3643
Q15691	Q15691	Microtubule-associated protein RP/EB family member 1	MAPRE1	24.1846	24.8635	24.5706	24.5396	25.0553	24.9188	24.241	24.7384	0.569309	0.1988
Q15717;Q12926;P26378	Q15717	ELAV-like protein 1	ELAVL1	26.7391	27.2478	27.3049	27.0973	27.5926	27.5518	26.7485	27.2976	0.579708	0.200367
Q15758	Q15758	Neutral amino acid transporter B(0)	SLC1A5	25.0521	24.8808	24.7886	24.9072	25.0756	24.4411	24.8852	24.8006	0.640675	-0.106533
Q15785	Q15785	Mitochondrial import receptor subunit TOM34	TOMM34	20.9461	21.6139	19.1079	20.556	19.5166	19.2687	16.3247	18.37	0.166824	-2.18597
Q15800	Q15800	Methylsterol monooxygenase 1	MSMO1	19.8301	17.8856	17.5227	18.4128	16.6472	16.3439	19.7177	17.5696	0.555155	-0.8432
Q15833	Q15833	Syntaxin-binding protein 2	STXBP2	18.8743	19.7256	19.039	19.213	19.4709	19.0599	18.7425	19.0911	0.735409	-0.121867
Q15843	Q15843	NEDD8	NEDD8	22.1129	17.8939	17.307	19.1046	16.6421	21.3473	21.6751	19.8882	0.742169	0.783567
Q15904	Q15904	V-type proton ATPase subunit S1	ATP6AP1	20.5753	17.1055	16.3032	17.9947	18.5373	18.6648	20.5154	19.2392	0.45817	1.2445
Q15907;P62491	Q15907;P62491	Ras-related protein Rab-11B;Ras-related protein Rab-11A	RAB11B;RAB11A	25.3249	25.4491	25.2819	25.352	25.3377	25.1308	25.223	25.2305	0.196856	-0.121467
Q15942	Q15942	Zyxin	ZYX	18.7708	19.8426	20.9399	19.8511	20.145	20.0066	19.1949	19.7822	0.927313	-0.0689333
Q16181;Q6ZU15	Q16181	Septin-7	SEPTIN7	25.2141	25.566	25.6521	25.4774	25.5228	25.2473	25.1943	25.3215	0.410047	-0.155933
Q16186	Q16186	Proteasomal ubiquitin receptor ADRM1	ADRM1	20.1007	20.8106	20.2551	20.3888	20.9368	20.9267	20.3321	20.7319	0.308393	0.343067
Q16204	Q16204	Coiled-coil domain-containing protein 6	CCDC6	20.8694	21.9912	21.9592	21.6066	22.2409	22.4023	21.8106	22.1513	0.278624	0.544667
Q16401	Q16401	26S proteasome non-ATPase regulatory subunit 5	PSMD5	18.3834	18.8765	18.593	18.6176	19.6109	18.7944	20.103	19.5028	0.13394	0.885133
Q16513	Q16513	Serine/threonine-protein kinase N2	PKN2	17.9145	17.3657	18.4981	17.9261	16.7865	17.4434	18.3114	17.5138	0.498045	-0.412333
Q16527	Q16527	Cysteine and glycine-rich protein 2	CSRP2	21.9023	22.2998	21.047	21.7497	20.9578	22.2618	21.5775	21.599	0.789415	-0.150667
Q16531	Q16531	DNA damage-binding protein 1	DDB1	25.3214	25.9293	25.6844	25.645	25.8486	25.7467	25.2189	25.6047	0.885783	-0.0403
Q16540	Q16540	Large ribosomal subunit protein uL23m	MRPL23	21.9968	16.9542	15.6898	18.2136	16.1357	22.4264	20.4264	19.6628	0.616765	1.44923
Q16563	Q16563	Synaptophysin-like protein 1	SYPL1	22.7837	17.532	17.5825	19.2994	23.3688	20.3236	15.6502	19.7809	0.87415	0.481467
Q16576	Q16576	Histone-binding protein RBBP7	RBBP7	23.6038	24.1985	24.2865	24.0296	23.9049	23.9489	23.318	23.7239	0.359555	-0.305667
Q16594;Q9HBM6	Q16594;Q9HBM6	Transcription initiation factor TFIID subunit 9;Transcription initiation factor TFIID subunit 9B	TAF9;TAF9B	19.0461	16.1591	17.3142	17.5065	17.4276	19.6688	18.0589	18.3851	0.460599	0.878633
Q16611	Q16611	Bcl-2 homologous antagonist/killer	BAK1	16.4688	17.386	16.7909	16.8819	18.4406	17.7778	15.8727	17.3637	0.603965	0.4818
Q16629	Q16629	Serine/arginine-rich splicing factor 7	SRSF7	27.1814	28.0006	27.8762	27.6861	27.9847	27.8188	27.0984	27.634	0.89563	-0.0521
Q16630	Q16630	Cleavage and polyadenylation specificity factor subunit 6	CPSF6	23.8923	25.0783	24.6489	24.5398	25.402	25.0221	24.7096	25.0446	0.291467	0.504733
Q16643	Q16643	Drebrin	DBN1	25.9313	26.451	26.6011	26.3278	26.4418	26.5213	25.7755	26.2462	0.806636	-0.0816
Q16656	Q16656	Nuclear respiratory factor 1	NRF1	21.2477	21.7028	21.7192	21.5566	21.9821	21.2226	20.8343	21.3463	0.612905	-0.210233
Q16658	Q16658	Fascin	FSCN1	17.3454	18.3212	18.475	18.0472	17.7091	18.0969	27.2975	21.0345	0.441326	2.9873
Q16666;Q6K0P9	Q16666	Gamma-interferon-inducible protein 16	IFI16	22.3522	21.9575	21.7512	22.0203	21.878	21.5262	22.1866	21.8636	0.579087	-0.1567
Q16698	Q16698	2,4-dienoyl-CoA reductase [(3E)-enoyl-CoA-producing], mitochondrial	DECR1	22.382	23.6014	22.6959	22.8931	23.7961	22.7666	22.4319	22.9982	0.857794	0.1051
Q16706	Q16706	Alpha-mannosidase 2	MAN2A1	16.9	17.8108	17.5326	17.4145	17.6679	17.5916	15.1817	16.8137	0.545545	-0.600733
Q16718	Q16718	NADH dehydrogenase [ubiquinone] 1 alpha subcomplex subunit 5	NDUFA5	22.04	22.5707	21.2557	21.9555	20.8205	23.1496	22.5594	22.1765	0.798923	0.221033
Q16795	Q16795	NADH dehydrogenase [ubiquinone] 1 alpha subcomplex subunit 9, mitochondrial	NDUFA9	21.5881	19.265	17.7401	19.5311	20.0651	20.4032	21.4079	20.6254	0.437086	1.09433
Q16822;P35558	Q16822	Phosphoenolpyruvate carboxykinase [GTP], mitochondrial	PCK2	20.2969	19.4745	20.4273	20.0662	21.02	20.2578	20.7125	20.6634	0.189066	0.5972
Q16831	Q16831	Uridine phosphorylase 1	UPP1	23.3353	23.321	23.6083	23.4215	22.6626	24.0495	23.7999	23.504	0.866353	0.0824667
Q16850	Q16850	Lanosterol 14-alpha demethylase	CYP51A1	17.2926	16.1499	16.8805	16.7743	17.15	17.9558	19.4199	18.1752	0.157644	1.4009
Q16851	Q16851	UTP--glucose-1-phosphate uridylyltransferase	UGP2	23.4377	23.4881	23.451	23.4589	23.1783	22.5769	22.5376	22.7643	0.0779416	-0.694667
Q16864	Q16864	V-type proton ATPase subunit F	ATP6V1F	21.6407	21.1647	21.5179	21.4411	21.6364	22.4894	21.7136	21.9465	0.198194	0.505367
Q16881;Q9NNW7	Q16881	Thioredoxin reductase 1, cytoplasmic	TXNRD1	20.4134	21.5994	21.562	21.1916	21.8999	21.8042	21.0173	21.5738	0.474077	0.3822
Q16891	Q16891	MICOS complex subunit MIC60	IMMT	23.9938	23.4837	23.6392	23.7056	23.3838	22.8065	24.1993	23.4632	0.619734	-0.242367
Q1ED39	Q1ED39	Lysine-rich nucleolar protein 1	KNOP1	19.7047	16.5385	19.8921	18.7118	20.6201	18.9926	20.3594	19.9907	0.368866	1.27893
Q1KMD3	Q1KMD3	Heterogeneous nuclear ribonucleoprotein U-like protein 2	HNRNPUL2	24.3321	25.0828	24.8878	24.7676	24.8061	25.242	24.6243	24.8908	0.693695	0.123233
Q27J81	Q27J81	Inverted formin-2	INF2	21.3861	20.9357	20.9923	21.1047	20.7713	20.7027	20.0132	20.4957	0.112015	-0.608967
Q29RF7	Q29RF7	Sister chromatid cohesion protein PDS5 homolog A	PDS5A	20.3065	19.1624	19.5767	19.6819	19.1557	19.7542	20.4755	19.7951	0.834461	0.113267
Q2M389	Q2M389	WASH complex subunit 4	WASHC4	20.0427	19.3075	18.7349	19.3617	19.9831	19.2179	20.1867	19.7959	0.419534	0.4342
Q2NL82	Q2NL82	Pre-rRNA-processing protein TSR1 homolog	TSR1	20.7775	20.4922	19.9386	20.4028	20.8079	20.9443	20.3995	20.7172	0.355747	0.314467
Q2TAY7	Q2TAY7	WD40 repeat-containing protein SMU1;WD40 repeat-containing protein SMU1, N-terminally processed	SMU1	23.6925	23.8564	23.5469	23.6986	23.9326	23.2364	23.0811	23.4167	0.397787	-0.2819
Q2TB10	Q2TB10	Zinc finger protein 800	ZNF800	15.7235	16.6414	17.0663	16.4771	15.8927	16.9141	16.0677	16.2915	0.733494	-0.185567
Q32MZ4	Q32MZ4	Leucine-rich repeat flightless-interacting protein 1	LRRFIP1	18.1264	19.0434	18.8162	18.662	18.7978	18.2371	19.2378	18.7576	0.82287	0.0955667
Q32P28	Q32P28	Prolyl 3-hydroxylase 1	P3H1	19.1659	20.0699	20.1095	19.7818	19.8622	20.0786	19.6982	19.8797	0.787885	0.0979
Q3B726	Q3B726	DNA-directed RNA polymerase I subunit RPA43	POLR1F	21.4805	22.0256	22.4771	21.9944	22.198	22.0449	21.7655	22.0028	0.980526	0.0084
Q3MHD2	Q3MHD2	Protein LSM12	LSM12	23.2473	24.1959	23.2555	23.5662	23.156	23.6761	22.6006	23.1442	0.393985	-0.422
Q3YEC7	Q3YEC7	Rab-like protein 6	RABL6	18.2597	19.2061	19.2526	18.9061	18.6422	19.5876	18.1834	18.8044	0.856288	-0.101733
Q3ZAQ7	Q3ZAQ7	Vacuolar ATPase assembly integral membrane protein VMA21	VMA21	17.0974	17.0544	17.6682	17.2733	16.7122	15.9991	17.6411	16.7841	0.419837	-0.4892
Q3ZCM7	Q3ZCM7	Tubulin beta-8 chain	TUBB8	24.2556	24.3164	24.0567	24.2096	24.0087	23.9404	24.3395	24.0962	0.488227	-0.113367
Q3ZCQ8	Q3ZCQ8	Mitochondrial import inner membrane translocase subunit TIM50	TIMM50	23.0133	20.3384	22.8961	22.0826	23.6947	23.8243	23.8228	23.7806	0.190842	1.698
Q49A26	Q49A26	Cytokine-like nuclear factor N-PAC	GLYR1	19.1426	18.8397	19.5108	19.1644	19.5133	20.2144	19.0494	19.5924	0.348695	0.428
Q4G0F5	Q4G0F5	Vacuolar protein sorting-associated protein 26B	VPS26B	19.956	20.6378	16.26	18.9513	20.6013	16.8347	17.3185	18.2515	0.718003	-0.699767
Q4G0J3	Q4G0J3	La-related protein 7	LARP7	21.7964	22.2862	22.1337	22.0721	22.4911	22.3005	22.0039	22.2652	0.394531	0.193067
Q4G148	Q4G148	Glucoside xylosyltransferase 1	GXYLT1	18.5941	15.9663	19.1381	17.8995	17.436	17.5513	19.1365	18.0413	0.907147	0.141767
Q4KMQ2	Q4KMQ2	Anoctamin-6	ANO6	17.8638	18.1299	17.4184	17.804	17.1395	17.0179	17.3423	17.1666	0.0738437	-0.637467
Q4V328	Q4V328	GRIP1-associated protein 1;GRASP-1 C-terminal chain	GRIPAP1	19.229	17.841	20.0827	19.0509	19.445	19.8733	19.5398	19.6194	0.477539	0.568467
Q52LJ0	Q52LJ0	Protein FAM98B	FAM98B	23.5155	24.034	24.134	23.8945	24.1287	24.0566	23.7032	23.9628	0.785185	0.0683333
Q52LW3	Q52LW3	Rho GTPase-activating protein 29	ARHGAP29	18.0587	19.2562	17.1109	18.1419	17.9424	18.212	18.1462	18.1002	0.952732	-0.0417333
Q53EL6	Q53EL6	Programmed cell death protein 4	PDCD4	20.0152	19.7329	16.1673	18.6385	19.2728	19.9125	18.6809	19.2887	0.657534	0.650267
Q53EP0	Q53EP0	Fibronectin type III domain-containing protein 3B	FNDC3B	17.534	16.2005	16.8471	16.8605	16.9859	16.7704	16.357	16.7044	0.739898	-0.1561
Q53F19	Q53F19	Nuclear cap-binding protein subunit 3	NCBP3	21.1565	21.6174	21.4694	21.4144	22.2565	22.0379	19.5282	21.2742	0.888151	-0.140233
Q53GG5	Q53GG5	PDZ and LIM domain protein 3	PDLIM3	18.4154	16.7824	19.8048	18.3342	21.1925	20.1662	19.1366	20.1651	0.167611	1.8309
Q53GQ0	Q53GQ0	Very-long-chain 3-oxoacyl-CoA reductase	HSD17B12	21.2933	15.8271	17.9738	18.3647	17.3775	18.5824	21.132	19.0306	0.750327	0.6659
Q53GS7	Q53GS7	mRNA export factor GLE1	GLE1	17.5649	16.6516	17.2738	17.1634	16.6601	16.1828	18.4715	17.1048	0.943134	-0.0586333
Q53GS9	Q53GS9	Ubiquitin carboxyl-terminal hydrolase 39	USP39	22.3804	22.3638	22.4363	22.3935	22.3349	22.1398	22.3835	22.2861	0.283398	-0.107433
Q53H12	Q53H12	Acylglycerol kinase, mitochondrial	AGK	18.9173	16.6327	18.79	18.1133	19.0454	18.0878	19.0551	18.7294	0.506172	0.6161
Q53H96	Q53H96	Pyrroline-5-carboxylate reductase 3	PYCR3	19.8459	20.5642	20.1355	20.1819	17.0031	19.9599	18.9482	18.6371	0.212452	-1.5448
Q562E7	Q562E7	WD repeat-containing protein 81	WDR81	19.6099	19.5719	19.5966	19.5928	20.1277	19.8996	16.9472	18.9915	0.616618	-0.6013
Q562R1	Q562R1	Beta-actin-like protein 2	ACTBL2	17.5256	17.4503	17.6295	17.5351	24.604	15.5867	17.4872	19.226	0.600627	1.69083
Q56VL3	Q56VL3	OCIA domain-containing protein 2	OCIAD2	24.3737	22.7172	23.6905	23.5938	22.7117	24.4906	24.4546	23.8856	0.720799	0.291833
Q58FF6	Q58FF6	Putative heat shock protein HSP 90-beta 4	HSP90AB4P	17.3893	16.8396	16.9426	17.0572	16.4875	21.32	16.9053	18.2376	0.525466	1.18043
Q58FF8	Q58FF8	Putative heat shock protein HSP 90-beta 2	HSP90AB2P	21.5769	21.9531	22.6837	22.0712	19.8487	21.6393	22.2767	21.2549	0.386273	-0.816333
Q5BJD5	Q5BJD5	Transmembrane protein 41B	TMEM41B	20.3277	19.2351	19.5087	19.6905	16.4055	15.7617	19.5057	17.2243	0.158622	-2.4662
Q5BJF2	Q5BJF2	Sigma intracellular receptor 2	TMEM97	20.5649	16.9565	18.5359	18.6858	18.2532	15.8588	20.3434	18.1518	0.765056	-0.533967
Q5BKZ1	Q5BKZ1	DBIRD complex subunit ZNF326	ZNF326	23.2868	24.7846	23.6614	23.9109	25.3925	24.4613	23.6075	24.4871	0.447973	0.576167
Q5EBL4	Q5EBL4	RILP-like protein 1	RILPL1	22.6892	24.1163	23.9249	23.5768	23.5173	22.0259	21.6315	22.3916	0.183026	-1.18523
Q5HYI8	Q5HYI8	Rab-like protein 3	RABL3	20.1113	20.0105	14.77	18.2973	17.8202	19.6517	19.8024	19.0914	0.705522	0.794167
Q5J8M3	Q5J8M3	ER membrane protein complex subunit 4	EMC4	17.3449	16.6268	17.3784	17.1167	16.6777	18.045	20.7145	18.4791	0.369362	1.36237
Q5JTD0	Q5JTD0	Tight junction-associated protein 1	TJAP1	19.8209	20.8429	20.4977	20.3872	20.8348	20.7461	19.9676	20.5162	0.767467	0.129
Q5JTH9	Q5JTH9	RRP12-like protein	RRP12	21.9733	22.2977	21.8589	22.0433	21.9348	22.0943	22.5241	22.1844	0.558209	0.1411
Q5JTV8	Q5JTV8	Torsin-1A-interacting protein 1	TOR1AIP1	22.1872	21.3493	21.548	21.6948	21.4641	21.3713	22.9497	21.9284	0.7104	0.233533
Q5JTZ9	Q5JTZ9	Alanine--tRNA ligase, mitochondrial	AARS2	18.4194	16.9681	16.9728	17.4534	17.8738	16.7499	18.288	17.6372	0.79646	0.1838
Q5JVF3	Q5JVF3	PCI domain-containing protein 2	PCID2	17.5556	18.2605	15.0611	16.9591	18.4719	17.895	17.7471	18.038	0.382499	1.07893
Q5K651;Q8IVG5	Q5K651	Sterile alpha motif domain-containing protein 9	SAMD9	17.0821	17.7302	17.7771	17.5298	17.471	17.0888	15.8315	16.7971	0.276821	-0.7327
Q5MIZ7	Q5MIZ7	Serine/threonine-protein phosphatase 4 regulatory subunit 3B	PPP4R3B	18.4971	19.6994	19.5383	19.2449	20.5432	20.1771	19.8826	20.201	0.109682	0.956033
Q5QJE6	Q5QJE6	Deoxynucleotidyltransferase terminal-interacting protein 2	DNTTIP2	21.3237	21.6249	21.7652	21.5713	21.843	22.0791	21.6305	21.8509	0.202669	0.2796
Q5RI15	Q5RI15	Cytochrome c oxidase assembly protein COX20, mitochondrial	COX20	22.3827	17.0073	18.0504	19.1468	22.191	22.0505	17.1115	20.451	0.607721	1.3042
Q5RKV6	Q5RKV6	Exosome complex component MTR3	EXOSC6	21.2122	21.49	21.0131	21.2384	21.6827	21.8528	21.0843	21.5399	0.34128	0.3015
Q5SNT2	Q5SNT2	Transmembrane protein 201	TMEM201	18.6561	15.7802	16.7077	17.048	17.4715	16.6046	19.618	17.898	0.528599	0.850033
Q5SRE5	Q5SRE5	Nucleoporin NUP188	NUP188	19.1167	19.9042	18.504	19.175	19.4643	19.1356	19.8007	19.4669	0.563663	0.2919
Q5SSJ5	Q5SSJ5	Heterochromatin protein 1-binding protein 3	HP1BP3	24.2075	24.3948	24.0769	24.2264	24.4962	24.2427	24.3447	24.3612	0.320078	0.1348
Q5SWX8	Q5SWX8	Protein odr-4 homolog	ODR4	18.9479	18.8812	19.4657	19.0983	19.3282	18.2716	19.8954	19.1651	0.90536	0.0668
Q5SY16	Q5SY16	Polynucleotide 5-hydroxyl-kinase NOL9	NOL9	19.6777	21.9336	20.4917	20.701	22.3111	21.5361	19.7456	21.1976	0.647941	0.4966
Q5T1M5	Q5T1M5	FK506-binding protein 15	FKBP15	19.5048	19.6406	19.3124	19.4859	19.4283	19.5058	19.2453	19.3931	0.492889	-0.0928
Q5T280	Q5T280	Putative methyltransferase C9orf114	SPOUT1	20.057	20.9379	20.8576	20.6175	20.6277	20.5234	19.9077	20.3529	0.504929	-0.264567
Q5T3I0	Q5T3I0	G patch domain-containing protein 4	GPATCH4	16.6134	19.2031	17.9029	17.9065	20.0202	19.9006	19.7724	19.8977	0.115472	1.99127
Q5T6F2	Q5T6F2	Ubiquitin-associated protein 2	UBAP2	19.2155	16.3634	16.7769	17.4519	16.5027	18.3929	18.699	17.8649	0.733088	0.412933
Q5T8D3	Q5T8D3	Acyl-CoA-binding domain-containing protein 5	ACBD5	16.9657	16.1012	16.7065	16.5911	16.701	16.3903	16.0131	16.3681	0.531642	-0.223
Q5T8P6	Q5T8P6	RNA-binding protein 26	RBM26	17.9707	18.3341	18.1965	18.1671	18.033	18.3476	18.3932	18.2579	0.5896	0.0908333
Q5T9A4	Q5T9A4	ATPase family AAA domain-containing protein 3B	ATAD3B	19.462	17.7062	19.0104	18.7262	18.4954	18.0136	19.3158	18.6083	0.865531	-0.117933
Q5TA45	Q5TA45	Integrator complex subunit 11	INTS11	18.6457	18.7963	18.3846	18.6089	18.6745	19.1935	18.6541	18.8407	0.346254	0.231833
Q5TC82;Q9HBD1	Q5TC82;Q9HBD1	Roquin-1;Roquin-2	RC3H1;RC3H2	16.4184	16.7013	16.7365	16.6187	17.7607	16.4406	16.6488	16.95	0.506831	0.3313
Q5TEC6	Q5TEC6	Histone H3-7	H3-7	25.1818	24.1571	23.7376	24.3588	24.7965	24.3339	25.7627	24.9644	0.370664	0.605533
Q5TGZ0	Q5TGZ0	MICOS complex subunit MIC10	MICOS10	15.6949	16.6287	15.8795	16.0677	17.5505	16.1444	22.0348	18.5766	0.292155	2.50887
Q5THK1	Q5THK1	Protein PRR14L	PRR14L	17.312	17.0569	16.9409	17.1033	16.2987	14.8216	17.7675	16.2959	0.443056	-0.807333
Q5TZA2	Q5TZA2	Rootletin	CROCC	19.9362	19.9102	19.744	19.8635	20.3121	19.8897	19.8733	20.025	0.38384	0.161567
Q5UCC4	Q5UCC4	ER membrane protein complex subunit 10	EMC10	21.2581	21.7359	21.7896	21.5945	21.8715	21.3618	15.9354	19.7229	0.428463	-1.87163
Q5VT52	Q5VT52	Regulation of nuclear pre-mRNA domain-containing protein 2	RPRD2	18.2698	18.5209	17.412	18.0676	17.4935	17.2356	17.1179	17.2823	0.133591	-0.785233
Q5VTL8	Q5VTL8	Pre-mRNA-splicing factor 38B	PRPF38B	20.7903	19.2545	19.1317	19.7255	17.9689	19.5611	19.3462	18.9587	0.353308	-0.766767
Q5VTR2	Q5VTR2	E3 ubiquitin-protein ligase BRE1A	RNF20	18.2772	19.8215	19.8835	19.3274	19.5446	19.4221	18.9371	19.3013	0.96609	-0.0261333
Q5VV42	Q5VV42	Threonylcarbamoyladenosine tRNA methylthiotransferase	CDKAL1	18.781	17.1337	18.7633	18.226	16.1141	18.0024	18.8033	17.6399	0.580924	-0.586067
Q5VW38	Q5VW38	Protein GPR107	GPR107	17.6893	18.9726	18.037	18.233	18.142	17.4221	17.517	17.6937	0.306297	-0.539267
Q5VWQ0;Q6PCB5	Q5VWQ0;Q6PCB5	Lysine-specific demethylase 9;Lysine-specific demethylase RSBN1L	RSBN1;RSBN1L	18.7308	18.2686	18.2683	18.4226	16.9796	18.411	19.1701	18.1869	0.752195	-0.235667
Q9UJF2;Q5VWQ8;Q96PV0	Q9UJF2;Q5VWQ8;Q96PV0	Ras GTPase-activating protein nGAP;Disabled homolog 2-interacting protein;Ras/Rap GTPase-activating protein SynGAP	RASAL2;DAB2IP;SYNGAP1	15.807	17.7317	18.3794	17.306	16.8523	16.0296	17.403	16.7616	0.575681	-0.5444
Q5VYK3	Q5VYK3	Proteasome adapter and scaffold protein ECM29	ECPAS	19.2308	18.923	18.8128	18.9889	19.4857	19.0674	19.189	19.2474	0.216444	0.2585
Q5VZE5	Q5VZE5	N-alpha-acetyltransferase 35, NatC auxiliary subunit	NAA35	18.4814	17.8483	15.9067	17.4121	17.0658	18.0108	18.342	17.8062	0.680035	0.394067
Q5VZM2;Q7L523	Q5VZM2;Q7L523	Ras-related GTP-binding protein B;Ras-related GTP-binding protein A	RRAGB;RRAGA	20.8051	17.9142	17.6833	18.8009	21.05	20.7697	20.3412	20.7203	0.192138	1.91943
Q9Y4E1;Q641Q2	Q9Y4E1;Q641Q2	WASH complex subunit 2C;WASH complex subunit 2A	WASHC2C;WASHC2A	16.3199	19.4429	19.0893	18.284	19.1731	18.4191	18.1377	18.5766	0.799997	0.2926
Q658P3	Q658P3	Metalloreductase STEAP3	STEAP3	20.4245	17.0368	19.9624	19.1412	16.2248	19.6278	19.3441	18.3989	0.651066	-0.742333
Q658Y4	Q658Y4	Protein FAM91A1	FAM91A1	18.6878	18.0243	17.8809	18.1977	17.9777	18.0304	17.7579	17.922	0.385709	-0.275667
Q66PJ3	Q66PJ3	ADP-ribosylation factor-like protein 6-interacting protein 4	ARL6IP4	20.1311	21.2209	21.7505	21.0342	20.5395	20.8375	20.1409	20.506	0.39028	-0.5282
Q68CQ4	Q68CQ4	U3 small nucleolar RNA-associated protein 25 homolog	UTP25	19.9024	20.4235	19.955	20.0936	20.2811	20.7803	20.63	20.5638	0.102497	0.470167
Q68E01	Q68E01	Integrator complex subunit 3	INTS3	19.1725	19.4125	23.9145	20.8332	17.8196	19.4955	19.8055	19.0402	0.369506	-1.79297
Q69YN4	Q69YN4	Protein virilizer homolog	VIRMA	15.8378	17.1902	18.4328	17.1536	17.9422	17.8216	15.5017	17.0885	0.955326	-0.0651
Q69YQ0	Q69YQ0	Cytospin-A	SPECC1L	19.2029	19.2299	17.9513	18.7947	19.6776	17.0445	18.5598	18.4273	0.700821	-0.3674
Q6DD87	Q6DD87	Zinc finger protein 787	ZNF787	19.1067	21.9031	21.6972	20.9023	19.9179	19.5865	18.8577	19.454	0.244065	-1.4483
Q6DD88	Q6DD88	Atlastin-3	ATL3	20.7903	20.8632	20.9781	20.8772	20.925	20.9812	21.1477	21.018	0.181258	0.140767
Q6DKI1	Q6DKI1	Ribosomal protein uL30-like	RPL7L1	20.3402	23.0323	23.5892	22.3206	21.9715	22.5509	22.2649	22.2624	0.95937	-0.0581333
Q6I9Y2	Q6I9Y2	THO complex subunit 7 homolog	THOC7	21.4277	22.1746	21.7231	21.7751	21.2599	21.8054	20.8762	21.3138	0.256496	-0.4613
Q6IAA8	Q6IAA8	Ragulator complex protein LAMTOR1	LAMTOR1	21.9179	20.7737	21.2404	21.3107	21.3257	22.0353	22.3524	21.9045	0.257927	0.5938
Q6IBS0	Q6IBS0	Twinfilin-2	TWF2	18.8252	19.694	19.3133	19.2775	20.1078	19.6717	19.5744	19.7846	0.177916	0.507133
Q6IBW4	Q6IBW4	Condensin-2 complex subunit H2	NCAPH2	18.6292	19.3176	19.4381	19.1283	19.2248	19.0161	18.8131	19.018	0.719942	-0.1103
Q6IN84	Q6IN84	rRNA methyltransferase 1, mitochondrial	MRM1	19.6585	17.0972	17.6578	18.1378	20.8493	20.5378	19.9717	20.4529	0.0845841	2.3151
Q6IN85	Q6IN85	Serine/threonine-protein phosphatase 4 regulatory subunit 3A	PPP4R3A	20.0691	21.5712	21.1882	20.9428	20.9916	21.253	20.0356	20.7601	0.770166	-0.182767
Q6L8Q7	Q6L8Q7	2,5-phosphodiesterase 12	PDE12	17.3622	18.9721	18.0086	18.1143	18.9424	17.4401	18.4206	18.2677	0.823046	0.1534
Q6NSJ0	Q6NSJ0	Myogenesis-regulating glycosidase	MYORG	15.8956	17.56	16.7885	16.748	15.9754	15.1494	16.769	15.9646	0.307714	-0.783433
Q6NSJ5	Q6NSJ5	Volume-regulated anion channel subunit LRRC8E	LRRC8E	18.6807	17.1031	18.2631	18.0156	17.1197	17.3052	17.0389	17.1546	0.207032	-0.861033
Q6NT76	Q6NT76	Homeobox-containing protein 1	HMBOX1	18.6898	19.8829	19.4738	19.3488	19.8942	19.3964	18.56	19.2835	0.906813	-0.0653
Q6NUK1	Q6NUK1	Mitochondrial adenyl nucleotide antiporter SLC25A24	SLC25A24	22.4534	19.0933	21.4052	20.984	21.5243	22.4775	22.4478	22.1499	0.362332	1.1659
Q6NUQ4	Q6NUQ4	Transmembrane protein 214	TMEM214	21.1506	20.5889	20.6661	20.8019	20.8458	20.363	21.7943	21.001	0.694858	0.199167
Q6NW34	Q6NW34	Nucleolus and neural progenitor protein	NEPRO	18.5796	18.8457	19.0557	18.827	19.1498	18.7298	19.1426	19.0074	0.408503	0.1804
Q6NYC1	Q6NYC1	Bifunctional arginine demethylase and lysyl-hydroxylase JMJD6	JMJD6	21.2625	22.4929	22.1823	21.9792	21.6254	21.6347	20.0535	21.1045	0.252503	-0.8747
Q6NYC8	Q6NYC8	Phostensin	PPP1R18	20.4717	20.9831	20.7787	20.7445	20.9055	21.5779	20.3736	20.9523	0.625259	0.207833
Q6NZI2	Q6NZI2	Caveolae-associated protein 1	CAVIN1	25.5026	25.2106	25.4309	25.3814	25.1817	24.9544	25.3799	25.172	0.245081	-0.209367
Q6NZY4	Q6NZY4	Zinc finger CCHC domain-containing protein 8	ZCCHC8	19.9164	20.9812	20.7004	20.5327	20.7614	21.6182	20.8575	21.079	0.263197	0.546367
Q6P0N0	Q6P0N0	Mis18-binding protein 1	MIS18BP1	18.0321	19.6991	19.818	19.1831	19.1777	17.8821	17.3135	18.1244	0.255385	-1.05863
Q6P1J9	Q6P1J9	Parafibromin	CDC73	20.0825	19.1116	18.8126	19.3356	19.5739	20.1392	19.5721	19.7617	0.39397	0.426167
Q6P1L8	Q6P1L8	Large ribosomal subunit protein uL14m	MRPL14	20.6489	22.4357	16.0472	19.7106	22.3605	21.7626	22.5118	22.2116	0.318753	2.50103
Q6P1M0	Q6P1M0	Long-chain fatty acid transport protein 4	SLC27A4	20.0293	16.9708	19.2459	18.7487	18.2922	17.3581	19.2933	18.3145	0.710816	-0.434133
Q6P1N0	Q6P1N0	Coiled-coil and C2 domain-containing protein 1A	CC2D1A	16.5751	16.58	17.4535	16.8695	17.7156	17.4003	17.6609	17.5923	0.120416	0.722733
Q6P2E9	Q6P2E9	Enhancer of mRNA-decapping protein 4	EDC4	20.5621	20.8477	20.4746	20.6281	19.6138	20.6064	20.2523	20.1575	0.241823	-0.470633
Q6P2Q9	Q6P2Q9	Pre-mRNA-processing-splicing factor 8	PRPF8	23.2162	23.4419	23.5892	23.4158	23.6498	23.3256	23.2721	23.4158	0.999688	6.66667e-05
Q6P5R6	Q6P5R6	Ribosomal protein eL22-like	RPL22L1	21.7445	22.4089	22.0059	22.0531	21.8139	17.2389	16.6883	18.5804	0.164271	-3.47273
Q6P9B6	Q6P9B6	MTOR-associated protein MEAK7	MEAK7	18.5913	19.2201	18.9585	18.9233	18.7896	18.9704	18.2942	18.6847	0.430812	-0.238567
Q6P9B9	Q6P9B9	Integrator complex subunit 5	INTS5	17.3821	19.0069	19.1705	18.5198	18.2461	17.8127	17.4841	17.8476	0.363718	-0.6722
Q6PD62	Q6PD62	RNA polymerase-associated protein CTR9 homolog	CTR9	17.3932	19.5267	19.9735	18.9645	19.516	19.0371	19.3552	19.3028	0.714156	0.3383
Q6PI48	Q6PI48	Aspartate--tRNA ligase, mitochondrial	DARS2	22.3139	22.2561	22.5288	22.3663	22.6377	22.381	22.2764	22.4317	0.656284	0.0654333
Q6PJG2	Q6PJG2	Mitotic deacetylase-associated SANT domain protein	MIDEAS	16.5839	17.6569	16.5099	16.9169	16.0718	16.1073	15.5262	15.9018	0.0932705	-1.01513
Q6PJG6	Q6PJG6	BRCA1-associated ATM activator 1	BRAT1	20.2172	20.1339	19.7713	20.0408	19.9825	19.9371	19.9827	19.9674	0.646355	-0.0733667
Q6PJT7	Q6PJT7	Zinc finger CCCH domain-containing protein 14	ZC3H14	21.2068	22.0588	21.9736	21.7464	22.192	21.9036	21.5547	21.8834	0.699973	0.137033
Q6PK04	Q6PK04	Coiled-coil domain-containing protein 137	CCDC137	19.0511	20.1909	16.127	18.4563	20.4904	19.8895	20.6485	20.3428	0.257181	1.88647
Q6PKG0;Q659C4	Q6PKG0	La-related protein 1	LARP1	21.1763	22.0582	21.6999	21.6448	21.5487	20.5107	20.7908	20.9501	0.161666	-0.694733
Q6PL18	Q6PL18	ATPase family AAA domain-containing protein 2	ATAD2	19.4962	20.6828	20.9756	20.3849	21.0665	20.6125	20.1333	20.6041	0.70301	0.219233
Q6QNY1	Q6QNY1	Biogenesis of lysosome-related organelles complex 1 subunit 2	BLOC1S2	20.6015	16.5789	17.3256	18.1687	20.8456	21.4776	20.8185	21.0472	0.141341	2.87857
Q6RFH5	Q6RFH5	WD repeat-containing protein 74	WDR74	22.0461	22.1385	22.1056	22.0967	22.8152	22.9472	22.3338	22.6987	0.0810471	0.602
Q6RW13	Q6RW13	Type-1 angiotensin II receptor-associated protein	AGTRAP	20.436	16.5252	17.4369	18.1327	16.8829	18.0273	16.0588	16.9897	0.450054	-1.14303
Q6S8J3;A5A3E0;P0CG38;P0CG39;Q9BYX7	Q6S8J3;A5A3E0;P0CG38;P0CG39	POTE ankyrin domain family member E;POTE ankyrin domain family member F;POTE ankyrin domain family member I;POTE ankyrin domain family member J	POTEE;POTEF;POTEI;POTEJ	19.9287	21.4788	20.2878	20.5651	21.5519	20.9223	20.7858	21.0867	0.394385	0.521567
Q6UB35	Q6UB35	Monofunctional C1-tetrahydrofolate synthase, mitochondrial	MTHFD1L	24.1454	24.437	24.5824	24.3883	24.4623	24.3823	24.2694	24.3713	0.912152	-0.0169333
Q6UN15	Q6UN15	Pre-mRNA 3-end-processing factor FIP1	FIP1L1	21.5347	22.3523	22.6029	22.1633	22.4912	22.7012	22.1592	22.4505	0.483933	0.287233
Q6UW68	Q6UW68	Transmembrane protein 205	TMEM205	20.8263	16.8424	16.5983	18.089	20.5519	19.6776	21.0093	20.4129	0.227072	2.32393
Q6UXN9	Q6UXN9	WD repeat-containing protein 82	WDR82	23.4094	24.0676	23.8986	23.7919	23.8868	23.7141	23.3329	23.6446	0.59743	-0.147267
Q6UXV4	Q6UXV4	MICOS complex subunit MIC27	APOOL	17.6469	17.2061	17.0827	17.3119	17.11	15.9849	18.0614	17.0521	0.712558	-0.2598
Q6WCQ1	Q6WCQ1	Myosin phosphatase Rho-interacting protein	MPRIP	18.9903	18.3539	19.3898	18.9113	18.2066	19.8563	19.2723	19.1117	0.745847	0.2004
Q6Y1H2	Q6Y1H2	Very-long-chain (3R)-3-hydroxyacyl-CoA dehydratase 2	HACD2	17.4728	17.2807	16.7695	17.1743	18.3694	17.1068	20.2025	18.5596	0.260314	1.38523
Q6Y7W6	Q6Y7W6	GRB10-interacting GYF protein 2	GIGYF2	19.4424	18.6727	16.1258	18.0803	17.1334	18.0769	18.7152	17.9752	0.930428	-0.105133
Q6YHK3	Q6YHK3	CD109 antigen	CD109	17.8639	18.224	18.3101	18.1327	18.0086	17.9324	17.6275	17.8562	0.200146	-0.2765
Q6YN16	Q6YN16	Hydroxysteroid dehydrogenase-like protein 2	HSDL2	21.125	21.4811	21.7128	21.4396	21.4248	21.357	20.9895	21.2571	0.451786	-0.182533
Q6ZMZ3	Q6ZMZ3	Nesprin-3	SYNE3	16.541	17.3285	17.1783	17.0159	16.6279	16.3879	15.6903	16.2354	0.104516	-0.780567
Q6ZSZ5	Q6ZSZ5	Rho guanine nucleotide exchange factor 18	ARHGEF18	19.5825	20.1392	19.724	19.8152	19.9437	19.4032	19.2478	19.5316	0.354073	-0.283667
Q6ZUT6	Q6ZUT6	Coiled-coil domain-containing protein 9B	CCDC9B	18.9942	18.7168	18.2612	18.6574	17.5404	18.3872	18.7222	18.2166	0.356084	-0.4408
Q6ZXV5	Q6ZXV5	Protein O-mannosyl-transferase TMTC3	TMTC3	17.5489	17.736	16.368	17.2176	17.0291	16.7593	16.9489	16.9124	0.551948	-0.3052
Q70J99	Q70J99	Protein unc-13 homolog D	UNC13D	16.8994	19.4211	19.615	18.6452	19.5391	16.6921	17.2691	17.8334	0.546265	-0.811733
Q70UQ0	Q70UQ0	Inhibitor of nuclear factor kappa-B kinase-interacting protein	IKBIP	23.0813	23.3987	22.9475	23.1425	23.5414	22.7633	23.4617	23.2555	0.713999	0.112967
Q71RC2	Q71RC2	La-related protein 4	LARP4	22.0019	21.9633	22.0817	22.0156	22.331	22.0907	21.7908	22.0708	0.760481	0.0552
Q71RG4	Q71RG4	Transmembrane and ubiquitin-like domain-containing protein 2	TMUB2	15.8158	16.8209	14.7846	15.8071	16.1328	16.6895	16.7018	16.508	0.356506	0.700933
Q71U36;P0DPH8;P0DPH7;Q6PEY2	Q71U36;P0DPH8;P0DPH7;Q6PEY2	Tubulin alpha-1A chain;Detyrosinated tubulin alpha-1A chain;Tubulin alpha-3D chain;Detyrosinated tubulin alpha-3D chain;Tubulin alpha-3C chain;Detyrosinated tubulin alpha-3C chain;Tubulin alpha-3E chain;Detyrosinated tubulin alpha-3E chain	TUBA1A;TUBA3D;TUBA3C;TUBA3E	23.4795	23.6843	23.9052	23.6897	23.4763	23.5118	23.5796	23.5226	0.305463	-0.1671
Q71UM5	Q71UM5	Ribosomal protein eS27-like	RPS27L	23.9855	24.5285	23.7238	24.0793	24.0003	23.3291	23.7374	23.6889	0.274886	-0.390333
Q76FK4	Q76FK4	Nucleolar protein 8	NOL8	16.9808	16.965	17.6871	17.211	17.9737	17.23	16.9768	17.3935	0.659184	0.182533
Q7KZ85	Q7KZ85	Transcription elongation factor SPT6	SUPT6H	16.8212	20.9017	17.8176	18.5135	19.8346	20.781	19.7178	20.1111	0.322119	1.59763
Q7KZF4	Q7KZF4	Staphylococcal nuclease domain-containing protein 1	SND1	25.0499	25.4192	25.2263	25.2318	24.9522	25.122	24.7884	24.9542	0.126276	-0.2776
Q7KZI7	Q7KZI7	Serine/threonine-protein kinase MARK2	MARK2	17.275	16.4731	17.3697	17.0393	16.5309	16.8093	17.0864	16.8089	0.528948	-0.2304
Q7L014	Q7L014	Probable ATP-dependent RNA helicase DDX46	DDX46	22.5215	22.2844	22.6362	22.4807	21.5369	22.7401	22.5157	22.2642	0.622557	-0.216467
Q7L0Y3	Q7L0Y3	tRNA methyltransferase 10 homolog C	TRMT10C	23.1431	22.9464	22.3679	22.8191	22.365	22.7261	22.5726	22.5546	0.381416	-0.264567
Q7L2E3	Q7L2E3	ATP-dependent RNA helicase DHX30	DHX30	21.2617	20.0667	20.658	20.6621	19.191	19.9935	21.0334	20.0726	0.414022	-0.5895
Q7L2H7	Q7L2H7	Eukaryotic translation initiation factor 3 subunit M	EIF3M	24.7129	24.7137	24.7115	24.7127	23.6792	24.2126	24.5491	24.147	0.155084	-0.565733
Q7L2J0	Q7L2J0	7SK snRNA methylphosphate capping enzyme	MEPCE	17.7988	17.8977	17.5672	17.7546	18.1256	18.6017	17.7261	18.1511	0.253794	0.396567
Q7L311	Q7L311	Armadillo repeat-containing X-linked protein 2	ARMCX2	16.3657	16.6235	18.4644	17.1512	18.3456	17.2849	17.1643	17.5983	0.59565	0.447067
Q7L576	Q7L576	Cytoplasmic FMR1-interacting protein 1	CYFIP1	22.6011	23.4969	23.2728	23.1236	23.0341	23.134	23.0228	23.0636	0.845056	-0.0599667
Q7L5D6	Q7L5D6	Golgi to ER traffic protein 4 homolog	GET4	16.4067	17.048	16.8487	16.7678	17.6467	17.3492	17.7081	17.568	0.0315667	0.8002
Q7LGA3	Q7LGA3	Heparan sulfate 2-O-sulfotransferase 1	HS2ST1	17.0053	16.1859	17.3496	16.8469	17.3604	17.514	15.9481	16.9408	0.885277	0.0939
Q7RTV0	Q7RTV0	PHD finger-like domain-containing protein 5A	PHF5A	24.8457	25.9924	25.3771	25.4051	25.2346	25.4289	24.7717	25.1451	0.544012	-0.26
Q7Z2K6	Q7Z2K6	Endoplasmic reticulum metallopeptidase 1	ERMP1	17.8747	18.6974	18.1285	18.2335	17.7735	17.4471	18.2698	17.8301	0.302491	-0.4034
Q7Z2T5	Q7Z2T5	TRMT1-like protein	TRMT1L	20.5255	20.9153	20.9335	20.7914	20.7142	20.6519	20.6734	20.6798	0.490692	-0.1116
Q7Z2W4	Q7Z2W4	Zinc finger CCCH-type antiviral protein 1	ZC3HAV1	22.4596	22.674	22.2647	22.4661	22.2163	21.9807	22.1611	22.1194	0.0794973	-0.346733
Q7Z2W9	Q7Z2W9	Large ribosomal subunit protein bL21m	MRPL21	20.7136	20.9279	17.1819	19.6078	18.2	18.8934	20.6444	19.2459	0.813488	-0.361867
Q7Z3B4	Q7Z3B4	Nucleoporin p54	NUP54	22.5032	23.1646	23.0415	22.9031	23.083	22.9597	22.36	22.8009	0.752091	-0.1022
Q7Z3K3	Q7Z3K3	Pogo transposable element with ZNF domain	POGZ	19.4797	19.9989	20.0112	19.8299	20.4142	19.3892	18.1083	19.3039	0.516797	-0.526033
Q7Z406	Q7Z406	Myosin-14	MYH14	20.9882	21.4274	21.2283	21.2146	21.6584	20.9675	21.0154	21.2138	0.997504	-0.000866667
Q7Z434	Q7Z434	Mitochondrial antiviral-signaling protein	MAVS	19.2495	17.2992	17.4603	18.003	17.2299	15.2234	16.9037	16.4523	0.153375	-1.55067
Q7Z460	Q7Z460	CLIP-associating protein 1	CLASP1	16.8696	16.2055	16.9895	16.6882	16.5355	16.4657	18.2079	17.0697	0.585822	0.3815
Q7Z478	Q7Z478	ATP-dependent RNA helicase DHX29	DHX29	17.8651	15.9725	18.916	17.5845	16.3736	14.9745	17.7085	16.3522	0.351393	-1.23233
Q7Z4G1	Q7Z4G1	COMM domain-containing protein 6	COMMD6	16.7398	18.8014	21.5311	19.0241	17.7898	21.5309	21.0772	20.1326	0.576309	1.10853
Q7Z4R8	Q7Z4R8	UPF0669 protein C6orf120	C6orf120	22.817	22.6807	23.3032	22.9336	21.8263	22.3667	22.2588	22.1506	0.0363694	-0.783033
Q7Z4V5	Q7Z4V5	Hepatoma-derived growth factor-related protein 2	HDGFL2	21.9536	22.4758	21.8367	22.0887	21.5215	22.3247	21.631	21.8257	0.458751	-0.262967
Q7Z5L9	Q7Z5L9	Interferon regulatory factor 2-binding protein 2	IRF2BP2	20.0513	20.8701	21.513	20.8115	21.1093	20.4709	19.0378	20.206	0.466933	-0.605467
Q7Z739	Q7Z739	YTH domain-containing family protein 3	YTHDF3	23.1416	23.3153	23.3679	23.2749	23.2211	22.8968	22.9733	23.0304	0.118175	-0.244533
Q7Z7H5	Q7Z7H5	Transmembrane emp24 domain-containing protein 4	TMED4	20.4011	19.4997	20.0752	19.992	15.4035	19.7012	20.478	18.5276	0.452228	-1.46443
Q7Z7H8	Q7Z7H8	Large ribosomal subunit protein uL10m	MRPL10	17.0885	15.185	20.4946	17.5894	21.069	20.7126	20.8414	20.8743	0.168138	3.28497
Q7Z7K6	Q7Z7K6	Centromere protein V	CENPV	17.0885	15.6962	17.3628	16.7158	18.0155	16.5534	19.0534	17.8741	0.269891	1.15827
Q86SF2	Q86SF2	N-acetylgalactosaminyltransferase 7	GALNT7	20.0644	18.2775	18.3464	18.8961	15.9673	16.2321	20.4352	17.5449	0.458218	-1.35123
Q86SJ2	Q86SJ2	Amphoterin-induced protein 2	AMIGO2	21.37	20.8162	20.2176	20.8013	20.4045	21.2784	21.7486	21.1438	0.543697	0.342567
Q86SQ0	Q86SQ0	Pleckstrin homology-like domain family B member 2	PHLDB2	19.1856	19.1932	19.4558	19.2782	18.9314	16.603	18.8995	18.1446	0.278471	-1.13357
Q86T03	Q86T03	Type 1 phosphatidylinositol 4,5-bisphosphate 4-phosphatase	PIP4P1	20.9495	21.1639	20.7467	20.9534	19.9196	21.1604	21.9674	21.0158	0.926901	0.0624333
Q86U38	Q86U38	Nucleolar protein 9	NOP9	18.1202	18.2394	15.557	17.3055	17.4863	18.1045	18.2737	17.9548	0.53987	0.6493
Q86U42	Q86U42	Polyadenylate-binding protein 2	PABPN1	23.4842	25.5982	24.3537	24.4787	24.6322	24.2131	23.7083	24.1845	0.692608	-0.294167
Q86U44	Q86U44	N6-adenosine-methyltransferase catalytic subunit	METTL3	19.45	20.0261	19.0666	19.5142	19.852	19.694	19.7685	19.7715	0.454433	0.257267
Q86U86	Q86U86	Protein polybromo-1	PBRM1	16.8665	16.6655	17.6007	17.0442	16.7839	16.4086	16.6989	16.6305	0.281173	-0.413767
Q86UE4	Q86UE4	Protein LYRIC	MTDH	21.4842	21.0584	20.1256	20.8894	20.7398	20.0587	21.3101	20.7029	0.747428	-0.186533
Q86UE8;Q9UKI8	Q86UE8;Q9UKI8	Serine/threonine-protein kinase tousled-like 2;Serine/threonine-protein kinase tousled-like 1	TLK2;TLK1	18.5395	18.2836	16.6447	17.8226	18.7781	17.8547	17.9991	18.2106	0.598999	0.388033
Q86UK7	Q86UK7	E3 ubiquitin-protein ligase ZNF598	ZNF598	23.207	24.4839	24.342	24.011	23.9322	22.8964	22.1037	22.9774	0.200498	-1.03353
Q86UP2	Q86UP2	Kinectin	KTN1	24.2859	23.6103	23.844	23.9134	24.1286	24.1344	24.1381	24.1337	0.381853	0.2203
Q86UY8	Q86UY8	5-nucleotidase domain-containing protein 3	NT5DC3	19.941	18.7737	18.4866	19.0671	19.0612	18.8288	18.4971	18.7957	0.613689	-0.2714
Q86V48	Q86V48	Leucine zipper protein 1	LUZP1	20.7816	20.7553	20.7185	20.7518	20.1471	20.4689	20.3667	20.3276	0.0422829	-0.424233
Q86V81	Q86V81	THO complex subunit 4	ALYREF	25.0635	25.1538	25.4496	25.2223	25.4534	25.1965	25.4282	25.3594	0.396151	0.137067
Q86VH2	Q86VH2	Kinesin-like protein KIF27	KIF27	21.2866	22.4293	22.585	22.1003	22.0852	21.0366	20.4439	21.1886	0.223527	-0.911733
Q86VI3	Q86VI3	Ras GTPase-activating-like protein IQGAP3	IQGAP3	16.816	16.2234	17.6209	16.8868	17.0424	16.7226	17.5989	17.1213	0.654525	0.234533
Q86VM9	Q86VM9	Zinc finger CCCH domain-containing protein 18	ZC3H18	20.3676	21.3194	20.7941	20.827	20.8473	21.4709	20.7527	21.0236	0.610977	0.1966
Q86VP6	Q86VP6	Cullin-associated NEDD8-dissociated protein 1	CAND1	18.4781	19.2315	19.6964	19.1353	18.0065	19.0812	18.1249	18.4042	0.211343	-0.731133
Q86VS8	Q86VS8	Protein Hook homolog 3	HOOK3	19.2086	19.7236	19.5929	19.5084	20.3621	19.9264	19.6006	19.963	0.174946	0.454667
Q86VY4	Q86VY4	Testis-specific Y-encoded-like protein 5	TSPYL5	18.8891	19.5201	19.5373	19.3155	19.3998	19.073	18.8257	19.0995	0.471636	-0.216
Q86W42	Q86W42	THO complex subunit 6 homolog	THOC6	22.1598	22.6294	22.3967	22.3953	22.8827	22.82	21.6572	22.4533	0.900888	0.058
Q86W92	Q86W92	Liprin-beta-1	PPFIBP1	18.6786	16.1489	18.2203	17.6826	16.712	18.9403	18.9232	18.1918	0.660122	0.509233
Q86WB0	Q86WB0	Zinc finger C3HC-type protein 1	ZC3HC1	16.1432	20.0211	19.7825	18.6489	16.8932	19.0557	18.7664	18.2384	0.791777	-0.4105
Q86WJ1	Q86WJ1	Chromodomain-helicase-DNA-binding protein 1-like	CHD1L	17.9235	17.9123	18.346	18.0606	18.1596	18.8651	18.1594	18.3947	0.30436	0.3341
Q86WX3	Q86WX3	Active regulator of SIRT1	RPS19BP1	16.6086	16.9148	16.6462	16.7232	17.7605	17.8518	19.7576	18.4566	0.113838	1.73343
Q86X29	Q86X29	Lipolysis-stimulated lipoprotein receptor	LSR	20.2224	19.3581	20.0296	19.87	19.1665	18.8477	20.2157	19.41	0.409211	-0.460067
Q86X51	Q86X51	EZH inhibitory protein	EZHIP	20.5415	20.7925	19.5525	20.2955	20.8364	18.4833	20.7378	20.0192	0.768745	-0.276333
Q86X55	Q86X55	Histone-arginine methyltransferase CARM1	CARM1	19.2875	20.1547	19.9235	19.7886	19.7771	19.4528	20.0422	19.7574	0.925458	-0.0312
Q86XP3	Q86XP3	ATP-dependent RNA helicase DDX42	DDX42	22.4576	22.8386	22.1145	22.4702	22.6701	22.7493	22.7424	22.7206	0.353656	0.250367
Q86XZ4	Q86XZ4	Spermatogenesis-associated serine-rich protein 2	SPATS2	19.6116	20.7319	19.4459	19.9298	19.0879	18.9935	19.6537	19.245	0.228892	-0.684767
Q86Y07	Q86Y07	Serine/threonine-protein kinase VRK2	VRK2	19.1977	17.6768	16.6456	17.84	16.7883	17.3437	18.2124	17.4481	0.674561	-0.3919
Q86Y82	Q86Y82	Syntaxin-12	STX12	20.139	19.7394	14.9734	18.2839	16.3054	18.9646	20.6082	18.6261	0.877866	0.342133
Q86Y91;Q8NI77	Q86Y91;Q8NI77	Kinesin-like protein KIF18B;Kinesin-like protein KIF18A	KIF18B;KIF18A	17.1441	17.3246	16.9831	17.1506	22.435	16.8482	17.1674	18.8169	0.454824	1.66627
Q86YP4	Q86YP4	Transcriptional repressor p66-alpha	GATAD2A	18.701	19.3015	19.1799	19.0608	19.4099	18.2209	19.7982	19.143	0.883406	0.0822
Q86YS6	Q86YS6	Ras-related protein Rab-43	RAB43	16.8739	17.6578	18.3525	17.6281	17.2589	18.1049	16.0777	17.1472	0.547502	-0.4809
Q8IUD2;O15083	Q8IUD2	ELKS/Rab6-interacting/CAST family member 1	ERC1	20.8759	20.1934	19.6743	20.2479	19.4609	20.7963	21.2782	20.5118	0.706966	0.263933
Q8IUE6;REV__Q8NB25	Q8IUE6	Histone H2A type 2-B	H2AC21	26.5877	26.3851	26.255	26.4093	26.8695	27.1184	27.0279	27.0053	0.00956813	0.596
Q8IUF8	Q8IUF8	Ribosomal oxygenase 2	RIOX2	18.7391	15.9756	19.417	18.0439	19.5019	20.1497	18.7099	19.4538	0.312977	1.40993
Q8IV08	Q8IV08	5-3 exonuclease PLD3	PLD3	19.8034	20.2199	20.0123	20.0119	19.4024	20.0351	19.878	19.7718	0.35632	-0.240033
Q8IV48	Q8IV48	3-5 exoribonuclease 1	ERI1	23.0972	23.2494	23.8047	23.3838	23.1948	23.4723	22.8057	23.1576	0.478267	-0.226167
Q8IVF2	Q8IVF2	Protein AHNAK2	AHNAK2	18.9263	18.6556	19.4843	19.0221	18.8384	18.6513	18.4888	18.6595	0.273797	-0.362567
Q8IVM0	Q8IVM0	Coiled-coil domain-containing protein 50	CCDC50	20.8709	21.0935	16.8914	19.6186	19.4803	20.8569	19.7737	20.037	0.793206	0.418367
Q8IVS2	Q8IVS2	Malonyl-CoA-acyl carrier protein transacylase, mitochondrial	MCAT	19.4896	19.1282	19.5106	19.3761	19.4874	19.4589	19.2278	19.3914	0.924127	0.0152333
Q8IVT2	Q8IVT2	Mitotic interactor and substrate of PLK1	MISP	22.1442	22.7312	21.684	22.1865	22.3354	22.2471	22.1581	22.2469	0.861481	0.0604
Q8IWA0	Q8IWA0	WD repeat-containing protein 75	WDR75	21.7754	22.7101	22.6628	22.3828	22.5169	21.1981	21.7302	21.8151	0.313325	-0.5677
Q8IWB1	Q8IWB1	Inositol 1,4,5-trisphosphate receptor-interacting protein	ITPRIP	16.3494	16.5313	16.6668	16.5158	16.4021	16.4872	16.8214	16.5702	0.748979	0.0544
Q8IWB7	Q8IWB7	WD repeat and FYVE domain-containing protein 1	WDFY1	20.6295	21.4773	21.0258	21.0442	21.2904	21.2726	20.2633	20.9421	0.820416	-0.1021
Q8IWJ2	Q8IWJ2	GRIP and coiled-coil domain-containing protein 2	GCC2	18.0744	16.5073	16.3297	16.9705	16.8786	18.1695	16.308	17.1187	0.858768	0.148233
Q8IWS0	Q8IWS0	PHD finger protein 6	PHF6	19.6037	16.5549	19.7224	18.627	18.2258	20.146	19.446	19.2726	0.621098	0.6456
Q8IWT6	Q8IWT6	Volume-regulated anion channel subunit LRRC8A	LRRC8A	17.3473	17.7696	18.2133	17.7767	18.1384	16.4971	18.0317	17.5557	0.732501	-0.221
Q8IWX8	Q8IWX8	Calcium homeostasis endoplasmic reticulum protein	CHERP	22.6335	22.7456	22.3034	22.5608	22.832	22.3342	22.0127	22.393	0.580157	-0.167867
Q8IWZ3;O75179	Q8IWZ3;O75179	Ankyrin repeat and KH domain-containing protein 1;Ankyrin repeat domain-containing protein 17	ANKHD1;ANKRD17	21.7007	22.9367	22.5967	22.4114	22.2886	21.3874	20.6669	21.4476	0.185499	-0.963733
Q8IX01	Q8IX01	SURP and G-patch domain-containing protein 2	SUGP2	17.4212	15.8325	17.1692	16.8076	17.6556	15.8169	17.0093	16.8273	0.979844	0.0196333
Q8IX12	Q8IX12	Cell division cycle and apoptosis regulator protein 1	CCAR1	22.0045	22.1886	22.4858	22.2263	22.6144	22.7061	22.4208	22.5804	0.111353	0.354133
Q8IX18	Q8IX18	Probable ATP-dependent RNA helicase DHX40	DHX40	17.9177	17.0578	17.2202	17.3986	16.1138	15.568	16.9337	16.2052	0.0758217	-1.1934
Q8IX90	Q8IX90	Spindle and kinetochore-associated protein 3	SKA3	17.9171	18.7775	16.2995	17.6647	19.5934	19.646	19.0364	19.4253	0.128134	1.76057
Q8IXB1	Q8IXB1	DnaJ homolog subfamily C member 10	DNAJC10	22.8037	23.4118	23.2076	23.141	23.0372	23.01	22.1879	22.745	0.308172	-0.396
Q8IXH7	Q8IXH7	Negative elongation factor C/D	NELFCD	21.0535	21.3934	21.6351	21.3607	19.7199	20.8392	20.8922	20.4838	0.134893	-0.8769
Q8IXI1	Q8IXI1	Mitochondrial Rho GTPase 2	RHOT2	20.9248	16.9885	18.3249	18.7461	20.5998	21.2778	21.5154	21.131	0.169401	2.38493
Q8IXI2	Q8IXI2	Mitochondrial Rho GTPase 1	RHOT1	16.9429	17.4931	16.4234	16.9531	17.3864	16.1567	17.672	17.0717	0.843619	0.118567
Q8IXK0	Q8IXK0	Polyhomeotic-like protein 2	PHC2	18.9601	19.3736	17.7067	18.6801	19.2055	16.1688	19.4301	18.2681	0.748018	-0.412
Q8IXM3	Q8IXM3	Large ribosomal subunit protein mL41	MRPL41	21.924	21.8231	21.9316	21.8929	22.0586	22.1743	21.8142	22.0157	0.368709	0.1228
Q8IXT5	Q8IXT5	RNA-binding protein 12B	RBM12B	17.7669	20.5594	19.9594	19.4286	18.8321	19.4684	19.8519	19.3841	0.964289	-0.0444333
Q8IY17	Q8IY17	Patatin-like phospholipase domain-containing protein 6	PNPLA6	19.012	17.573	16.4194	17.6681	15.778	16.1531	17.1256	16.3522	0.217881	-1.3159
Q8IY18	Q8IY18	Structural maintenance of chromosomes protein 5	SMC5	15.1322	16.1645	18.237	16.5112	16.5649	16.8622	16.9327	16.7866	0.792161	0.275367
Q8IY37	Q8IY37	Probable ATP-dependent RNA helicase DHX37	DHX37	16.6201	16.7538	18.4645	17.2795	16.7569	16.1475	19.0088	17.3044	0.982393	0.0249333
Q8IY67	Q8IY67	Ribonucleoprotein PTB-binding 1	RAVER1	22.051	21.0881	20.9821	21.3737	21.242	22.1613	21.6547	21.686	0.511596	0.312267
Q8IY81	Q8IY81	pre-rRNA 2-O-ribose RNA methyltransferase FTSJ3	FTSJ3	23.1085	22.4882	22.5045	22.7004	21.807	23.2247	23.4188	22.8168	0.846982	0.116433
Q8IY95	Q8IY95	Transmembrane protein 192	TMEM192	19.2412	16.5217	15.839	17.2006	16.716	18.7059	19.1855	18.2025	0.48302	1.00183
Q8IYA6	Q8IYA6	Cytoskeleton-associated protein 2-like	CKAP2L	17.1156	15.9347	17.6738	16.908	16.8429	16.6061	16.7713	16.7401	0.775331	-0.167933
Q8IYB3	Q8IYB3	Serine/arginine repetitive matrix protein 1	SRRM1	21.2551	21.8759	21.2117	21.4476	22.0645	22.0014	21.7957	21.9539	0.129599	0.5063
Q8IYB8	Q8IYB8	ATP-dependent RNA helicase SUPV3L1, mitochondrial	SUPV3L1	20.4893	18.4564	18.7862	19.244	21.104	20.3929	19.8875	20.4615	0.18617	1.2175
Q8IYI6	Q8IYI6	Exocyst complex component 8	EXOC8	18.6295	19.0801	19.1227	18.9441	18.8838	17.3054	19.0205	18.4032	0.432249	-0.540867
Q8IYS2	Q8IYS2	Uncharacterized protein KIAA2013	KIAA2013	16.0587	17.0268	17.3849	16.8235	17.8502	15.8506	18.0117	17.2375	0.638675	0.414033
Q8IYT4	Q8IYT4	Katanin p60 ATPase-containing subunit A-like 2	KATNAL2	23.5567	24.262	23.9128	23.9105	24.449	24.0414	23.5974	24.0293	0.72938	0.118767
Q8IYU8	Q8IYU8	Calcium uptake protein 2, mitochondrial	MICU2	19.956	16.6575	16.5063	17.7066	18.8808	18.4396	19.4551	18.9252	0.393369	1.21857
Q8IZL8	Q8IZL8	Proline-, glutamic acid- and leucine-rich protein 1	PELP1	22.4231	23.188	22.6484	22.7532	22.7753	23.0011	22.8974	22.8913	0.610379	0.1381
Q8IZP0	Q8IZP0	Abl interactor 1	ABI1	21.0324	21.9671	22.0011	21.6669	22.0812	20.048	19.6535	20.5942	0.289685	-1.07263
Q8N0U8	Q8N0U8	Vitamin K epoxide reductase complex subunit 1-like protein 1	VKORC1L1	20.2377	19.6451	15.8287	18.5705	16.9977	16.641	20.1937	17.9441	0.743953	-0.626367
Q8N137	Q8N137	Centrobin	CNTROB	19.545	21.2601	21.0254	20.6102	21.0275	19.4864	18.3716	19.6285	0.361175	-0.981667
Q8N163	Q8N163	Cell cycle and apoptosis regulator protein 2	CCAR2	23.6356	23.6783	23.876	23.73	23.9805	24.272	23.7287	23.9937	0.230604	0.263767
Q8N183	Q8N183	NADH dehydrogenase [ubiquinone] 1 alpha subcomplex assembly factor 2	NDUFAF2	19.4423	20.5319	17.9383	19.3042	20.141	19.5121	19.4663	19.7065	0.651892	0.4023
Q8N1B4	Q8N1B4	Vacuolar protein sorting-associated protein 52 homolog	VPS52	16.86	16.6838	16.7672	16.7703	16.5298	17.0035	18.9608	17.498	0.431285	0.7277
Q8N1F7	Q8N1F7	Nuclear pore complex protein Nup93	NUP93	23.4584	24.1274	23.895	23.8269	23.9619	23.8594	23.6455	23.8223	0.984263	-0.00466667
Q8N1G2	Q8N1G2	Cap-specific mRNA (nucleoside-2-O-)-methyltransferase 1	CMTR1	16.5524	18.0442	17.3773	17.3246	17.3986	16.524	17.6371	17.1866	0.814267	-0.138067
Q8N1G4	Q8N1G4	Leucine-rich repeat-containing protein 47	LRRC47	21.726	21.6137	21.659	21.6662	21.8349	21.3326	21.5789	21.5821	0.623888	-0.0841
Q8N1I0	Q8N1I0	Dedicator of cytokinesis protein 4	DOCK4	21.6355	17.3113	23.7781	20.9083	23.298	21.6456	21.0011	21.9816	0.63875	1.07327
Q8N201	Q8N201	Integrator complex subunit 1	INTS1	15.1745	18.4244	18.2971	17.2987	15.2624	15.4194	15.2897	15.3238	0.204013	-1.97483
Q8N2F6	Q8N2F6	Armadillo repeat-containing protein 10	ARMC10	17.7177	16.7183	16.0752	16.8371	16.2508	15.1546	16.3505	15.9186	0.211377	-0.918433
Q8N2K0	Q8N2K0	Lysophosphatidylserine lipase ABHD12	ABHD12	18.6825	18.882	17.0308	18.1984	18.1384	18.0115	18.5584	18.2361	0.955651	0.0376667
Q8N357	Q8N357	Solute carrier family 35 member F6	SLC35F6	20.0661	15.9575	19.7737	18.5991	20.0608	20.0739	20.5258	20.2202	0.345049	1.62107
Q8N3A8	Q8N3A8	Protein mono-ADP-ribosyltransferase PARP8	PARP8	24.0268	24.7737	24.834	24.5448	24.4743	24.9174	24.3607	24.5841	0.906227	0.0393
Q8N3E9	Q8N3E9	1-phosphatidylinositol 4,5-bisphosphate phosphodiesterase delta-3	PLCD3	17.9846	18.0329	16.7757	17.5977	15.4124	17.9936	18.0335	17.1465	0.671783	-0.451233
Q8N3U4	Q8N3U4	Cohesin subunit SA-2	STAG2	17.7761	17.6631	17.8901	17.7764	16.9594	18.5601	17.9405	17.82	0.934389	0.0435667
Q8N3V7	Q8N3V7	Synaptopodin	SYNPO	20.8476	20.3874	20.6065	20.6138	20.3629	20.7471	20.3474	20.4858	0.529959	-0.128033
Q8N3X1	Q8N3X1	Formin-binding protein 4	FNBP4	20.7614	20.9785	21.1653	20.9684	21.1664	21.1362	20.0332	20.7786	0.668054	-0.1898
Q8N412	Q8N412	Sperm-tail PG-rich repeat-containing protein 2	STPG2	16.2455	16.6307	20.0891	17.6551	19.8257	17.4701	16.5332	17.943	0.863492	0.2879
Q8N4V1	Q8N4V1	ER membrane protein complex subunit 5	MMGT1	22.6968	19.1025	19.8837	20.561	17.3203	17.7771	22.7929	19.2968	0.579497	-1.26423
Q8N5C6	Q8N5C6	S1 RNA-binding domain-containing protein 1	SRBD1	16.7337	18.5332	17.6191	17.6287	17.2507	16.4069	15.943	16.5335	0.171148	-1.09513
Q8N5L8	Q8N5L8	Ribonuclease P protein subunit p25-like protein	RPP25L	20.1144	19.7102	20.6633	20.1626	21.3145	20.6299	20.0933	20.6792	0.317018	0.5166
Q8N5M9	Q8N5M9	Protein jagunal homolog 1	JAGN1	19.5408	17.6261	19.165	18.7773	17.0391	17.1747	19.5453	17.9197	0.445073	-0.8576
Q8N5N7	Q8N5N7	Large ribosomal subunit protein mL50	MRPL50	21.6448	22.3304	22.8648	22.28	22.9392	22.614	21.8129	22.4554	0.736772	0.175367
Q8N684	Q8N684	Cleavage and polyadenylation specificity factor subunit 7	CPSF7	23.999	24.2845	24.4284	24.2373	24.1505	24.2607	24.0594	24.1569	0.605759	-0.0804333
Q8N6L1	Q8N6L1	Keratinocyte-associated protein 2	KRTCAP2	17.5631	15.4065	19.1078	17.3591	15.1746	15.9289	16.6307	15.9114	0.310181	-1.44773
Q8N6R0	Q8N6R0	eEF1A lysine and N-terminal methyltransferase;eEF1A lysine methyltransferase;eEF1A N-terminal methyltransferase	METTL13	17.4452	17.5277	18.983	17.9853	17.621	16.0449	15.8804	16.5154	0.121078	-1.46987
Q8N766	Q8N766	ER membrane protein complex subunit 1	EMC1	21.0819	18.7968	19.5882	19.8223	19.5067	19.0112	21.3599	19.9593	0.895594	0.136967
Q8N7H5	Q8N7H5	RNA polymerase II-associated factor 1 homolog	PAF1	22.0925	22.6819	22.3662	22.3802	23.106	22.9599	22.2363	22.7674	0.301791	0.3872
Q8N8A6	Q8N8A6	ATP-dependent RNA helicase DDX51	DDX51	19.6188	18.2582	20.2151	19.364	20.2553	19.2515	19.4274	19.6447	0.697348	0.2807
Q8N8S7	Q8N8S7	Protein enabled homolog	ENAH	17.2819	19.2515	18.2155	18.2496	19.9723	15.6158	17.6102	17.7328	0.734989	-0.516867
Q8N983	Q8N983	Large ribosomal subunit protein mL43	MRPL43	21.3488	18.1491	21.8264	20.4414	21.8455	22.2017	21.6488	21.8987	0.333628	1.45723
Q8N9T8	Q8N9T8	Protein KRI1 homolog	KRI1	19.0435	19.636	19.5849	19.4215	19.5564	19.3184	18.9747	19.2832	0.615201	-0.1383
Q8NAV1	Q8NAV1	Pre-mRNA-splicing factor 38A	PRPF38A	19.8334	16.5246	16.5729	17.6436	16.4786	16.4785	18.6425	17.1999	0.754545	-0.443767
Q8NBI5	Q8NBI5	Equilibrative nucleobase transporter 1	SLC43A3	21.5422	19.9926	20.4208	20.6519	20.211	19.9104	21.4651	20.5288	0.861906	-0.123033
Q8NBJ5	Q8NBJ5	Procollagen galactosyltransferase 1	COLGALT1	24.5006	24.6674	24.8701	24.6794	25.19	24.8993	24.6664	24.9186	0.273588	0.2392
Q8NBN3	Q8NBN3	Transmembrane protein 87A	TMEM87A	18.6377	17.0536	16.6142	17.4352	17.6372	16.5294	18.4262	17.5309	0.913224	0.0957667
Q8NBQ5	Q8NBQ5	Estradiol 17-beta-dehydrogenase 11	HSD17B11	21.3744	21.5376	21.3047	21.4056	20.7457	20.1793	21.4865	20.8038	0.250634	-0.601733
Q8NBS9	Q8NBS9	Thioredoxin domain-containing protein 5	TXNDC5	22.9189	23.899	23.6406	23.4862	23.8067	23.4612	22.836	23.368	0.786602	-0.1182
Q8NBT2	Q8NBT2	Kinetochore protein Spc24	SPC24	20.0036	20.1843	20.8113	20.3331	20.5934	19.373	19.6428	19.8697	0.363635	-0.463333
Q8NBU5	Q8NBU5	Outer mitochondrial transmembrane helix translocase	ATAD1	19.8492	17.0647	16.721	17.8783	17.6299	17.0472	16.3191	16.9987	0.476758	-0.879567
Q8NBX0	Q8NBX0	Saccharopine dehydrogenase-like oxidoreductase	SCCPDH	19.4	17.6708	15.3674	17.4794	18.0769	17.9292	19.3295	18.4452	0.504467	0.9658
Q8NBZ7	Q8NBZ7	UDP-glucuronic acid decarboxylase 1	UXS1	19.3946	19.2012	19.0943	19.23	16.9975	18.5416	18.9156	18.1516	0.205436	-1.07847
Q8NC51	Q8NC51	SERPINE1 mRNA-binding protein 1	SERBP1	25.4595	25.3001	24.9525	25.2374	25.1363	24.7075	25.2028	25.0155	0.361789	-0.221833
Q8NC56	Q8NC56	LEM domain-containing protein 2	LEMD2	17.6331	17.7143	16.5136	17.287	16.8984	15.4839	18.3937	16.9253	0.723545	-0.361667
Q8NC60	Q8NC60	Nitric oxide-associated protein 1	NOA1	17.983	15.7401	16.8678	16.8636	16.9793	17.3781	17.1827	17.18	0.675418	0.3164
Q8NCA5	Q8NCA5	Protein FAM98A	FAM98A	22.8135	21.9	21.4767	22.0634	22.6808	21.5422	22.3178	22.1803	0.83284	0.116867
Q8NCG7	Q8NCG7	Diacylglycerol lipase-beta	DAGLB	17.2302	18.1445	16.9979	17.4575	16.6357	18.8498	18.6811	18.0555	0.507051	0.598
Q8NCN5	Q8NCN5	Pyruvate dehydrogenase phosphatase regulatory subunit, mitochondrial	PDPR	20.6364	20.3967	20.027	20.3534	21.1857	20.7935	20.8929	20.9574	0.0552808	0.604
Q8NDH2	Q8NDH2	Leucine-rich repeat transmembrane protein CCDC168	CCDC168	16.0065	18.5338	19.0114	17.8506	18.7702	18.6382	18.5772	18.6619	0.476051	0.8113
Q8NE18	Q8NE18	Putative methyltransferase NSUN7	NSUN7	16.5205	18.0173	18.2396	17.5925	17.7117	16.0795	15.8752	16.5555	0.261502	-1.037
Q8NE71	Q8NE71	ATP-binding cassette sub-family F member 1	ABCF1	23.0607	23.0977	22.7931	22.9838	22.1241	22.0431	23.1246	22.4306	0.24878	-0.553233
Q8NE86	Q8NE86	Calcium uniporter protein, mitochondrial	MCU	19.0034	16.2439	17.5048	17.584	16.042	16.797	18.6382	17.1591	0.721165	-0.424967
Q8NEF9	Q8NEF9	Serum response factor-binding protein 1	SRFBP1	19.7164	17.4554	19.9719	19.0479	19.4048	20.012	19.8916	19.7695	0.464265	0.721567
Q8NEM2	Q8NEM2	SHC SH2 domain-binding protein 1	SHCBP1	21.2815	21.7245	21.8744	21.6268	21.8706	21.8384	21.4727	21.7272	0.672653	0.100433
Q8NEW0	Q8NEW0	Zinc transporter 7	SLC30A7	20.5683	19.8371	20.0953	20.1669	20.8171	19.8866	20.5438	20.4158	0.517824	0.248933
Q8NEY8	Q8NEY8	Periphilin-1	PPHLN1	20.9788	21.0096	21.2807	21.0897	21.1606	21.5551	21.1499	21.2885	0.298855	0.198833
Q8NF37	Q8NF37	Lysophosphatidylcholine acyltransferase 1	LPCAT1	19.716	17.8457	17.9039	18.4885	17.2543	17.0613	19.7364	18.0173	0.681337	-0.4712
Q8NF91	Q8NF91	Nesprin-1	SYNE1	19.1341	19.7564	19.8115	19.5673	19.8565	19.7735	15.8071	18.479	0.502116	-1.0883
Q8NFH3	Q8NFH3	Nucleoporin Nup43	NUP43	23.6995	24.5271	24.5225	24.2497	24.5643	24.4111	23.6184	24.1979	0.903776	-0.0517667
Q8NFH4	Q8NFH4	Nucleoporin Nup37	NUP37	22.9038	24.2658	23.1869	23.4522	24.2041	23.8636	22.9655	23.6777	0.705781	0.225567
Q8NFH5	Q8NFH5	Nucleoporin NUP35	NUP35	22.6468	22.4364	22.705	22.5961	22.8326	22.8628	22.8012	22.8322	0.0953348	0.236133
Q8NFJ5	Q8NFJ5	Retinoic acid-induced protein 3	GPRC5A	20.1654	19.7433	19.89	19.9329	19.9531	19.6212	20.3627	19.979	0.863473	0.0461
Q8NFQ8	Q8NFQ8	Torsin-1A-interacting protein 2	TOR1AIP2	19.4468	15.8011	19.3961	18.2147	19.469	19.5098	20.2395	19.7394	0.333064	1.52477
Q8NFW8	Q8NFW8	N-acylneuraminate cytidylyltransferase	CMAS	21.4579	21.6573	21.5146	21.5433	21.6365	21.0224	21.2174	21.2921	0.298354	-0.251167
Q8NFZ0	Q8NFZ0	F-box DNA helicase 1	FBH1	17.4357	19.5322	19.4264	18.7981	17.7338	18.9186	17.2113	17.9546	0.38087	-0.843533
Q8NHH9	Q8NHH9	Atlastin-2	ATL2	19.8454	19.0906	18.9324	19.2895	19.5868	19.7802	19.8944	19.7538	0.236051	0.464333
Q8NI27	Q8NI27	THO complex subunit 2	THOC2	18.0957	16.2882	18.7709	17.7183	18.232	17.1503	18.5026	17.9616	0.792175	0.243367
Q8NI36	Q8NI36	WD repeat-containing protein 36	WDR36	20.9551	21.4642	21.2234	21.2142	21.6085	21.944	21.9921	21.8482	0.0307057	0.633967
Q8TAA9	Q8TAA9	Vang-like protein 1	VANGL1	18.9591	15.7293	18.072	17.5868	18.1027	16.0159	15.6662	16.5949	0.466649	-0.991867
Q8TAE8	Q8TAE8	Large ribosomal subunit protein mL64	GADD45GIP1	19.7925	16.6862	16.9153	17.798	16.3746	16.7552	18.041	17.0569	0.555916	-0.741067
Q8TAQ2	Q8TAQ2	SWI/SNF complex subunit SMARCC2	SMARCC2	21.5599	21.9179	22.0517	21.8432	22.3668	22.3437	22.2161	22.3089	0.0751192	0.4657
Q8TAT6	Q8TAT6	Nuclear protein localization protein 4 homolog	NPLOC4	19.96	20.68	19.8436	20.1612	20.2498	19.6438	20.2867	20.0601	0.778212	-0.1011
Q8TB36	Q8TB36	Ganglioside-induced differentiation-associated protein 1	GDAP1	18.3205	16.6487	18.332	17.7671	16.1304	16.4938	19.8567	17.4936	0.84885	-0.273433
Q8TB72	Q8TB72	Pumilio homolog 2	PUM2	17.4682	19.0468	19.3723	18.6291	15.19	19.0516	18.8248	17.6888	0.547642	-0.9403
Q8TBB5	Q8TBB5	Kelch domain-containing protein 4	KLHDC4	17.5537	18.153	17.7709	17.8259	15.3388	16.9114	16.5903	16.2802	0.0704033	-1.5457
Q8TBK6	Q8TBK6	Zinc finger CCHC domain-containing protein 10	ZCCHC10	16.4947	19.9219	20.9072	19.1079	16.0362	21.4356	20.404	19.2919	0.935414	0.184
Q8TBP6	Q8TBP6	Probable mitochondrial glutathione transporter SLC25A40	SLC25A40	18.5787	17.4858	16.2656	17.4434	17.54	16.4312	16.8252	16.9321	0.542354	-0.511233
Q8TBX8	Q8TBX8	Phosphatidylinositol 5-phosphate 4-kinase type-2 gamma	PIP4K2C	19.785	16.8644	15.784	17.4778	16.4453	19.9281	19.5048	18.6261	0.518402	1.14827
Q8TC12	Q8TC12	Retinol dehydrogenase 11	RDH11	22.0132	21.8108	21.0747	21.6329	19.9859	21.7175	22.6807	21.4614	0.853292	-0.171533
Q8TCJ2	Q8TCJ2	Dolichyl-diphosphooligosaccharide--protein glycosyltransferase subunit STT3B	STT3B	20.522	18.2563	19.5065	19.4283	18.918	15.7731	20.3016	18.3309	0.51677	-1.09737
Q8TCS8	Q8TCS8	Polyribonucleotide nucleotidyltransferase 1, mitochondrial	PNPT1	23.2664	23.8993	23.7713	23.6457	23.8458	23.8428	23.3308	23.6731	0.92045	0.0274667
Q8TCT8	Q8TCT8	Signal peptide peptidase-like 2A	SPPL2A	21.0602	20.3705	18.8364	20.089	20.4905	20.1101	20.526	20.3755	0.707982	0.2865
Q8TCT9	Q8TCT9	Minor histocompatibility antigen H13	HM13	22.2211	20.6416	21.2788	21.3805	20.7036	20.9036	21.7885	21.1319	0.68579	-0.2486
Q8TCU6	Q8TCU6	Phosphatidylinositol 3,4,5-trisphosphate-dependent Rac exchanger 1 protein	PREX1	19.9596	21.3004	21.2057	20.8219	21.1765	19.5269	18.8883	19.8639	0.311827	-0.958
Q8TDB6	Q8TDB6	E3 ubiquitin-protein ligase DTX3L	DTX3L	19.4187	19.7288	19.9761	19.7079	19.3712	17.7835	18.8203	18.6583	0.141955	-1.04953
Q8TDD1	Q8TDD1	ATP-dependent RNA helicase DDX54	DDX54	22.0633	22.2982	22.0222	22.1279	22.0606	21.8193	22.3398	22.0732	0.771905	-0.0546667
Q8TDN6	Q8TDN6	Ribosome biogenesis protein BRX1 homolog	BRIX1	23.6327	23.9779	24.3508	23.9871	24.12	23.5254	23.5384	23.7279	0.415249	-0.2592
Q8TEA8	Q8TEA8	D-aminoacyl-tRNA deacylase 1	DTD1	14.5484	20.1704	19.8899	18.2029	20.1363	16.2472	19.8909	18.7581	0.816285	0.555233
Q8TED0	Q8TED0	U3 small nucleolar RNA-associated protein 15 homolog	UTP15	22.2095	22.1723	22.3569	22.2462	22.2629	21.9957	22.374	22.2109	0.796897	-0.0353667
Q8TED1	Q8TED1	Probable glutathione peroxidase 8	GPX8	20.8955	20.6956	20.1558	20.5823	17.3002	16.874	20.5194	18.2312	0.173802	-2.3511
Q8TEQ6	Q8TEQ6	Gem-associated protein 5	GEMIN5	20.2163	19.7853	19.5878	19.8631	17.5608	19.9203	19.9729	19.1513	0.467517	-0.7118
Q8TEW0	Q8TEW0	Partitioning defective 3 homolog	PARD3	18.5261	17.0296	17.8373	17.7977	17.407	18.0151	17.8461	17.7561	0.935507	-0.0416
Q8TEX9	Q8TEX9	Importin-4	IPO4	17.0357	17.7623	18.3137	17.7039	16.6617	16.2046	16.2897	16.3853	0.0561536	-1.31857
Q8TF05	Q8TF05	Serine/threonine-protein phosphatase 4 regulatory subunit 1	PPP4R1	19.6796	20.6588	20.7118	20.3501	17.9115	20.2108	17.1865	18.4363	0.160157	-1.9138
Q8TF68	Q8TF68	Zinc finger protein 384	ZNF384	19.8629	15.6703	15.8764	17.1365	20.4341	20.2627	19.7084	20.1351	0.155978	2.99853
Q8TF72	Q8TF72	Protein Shroom3	SHROOM3	20.582	23.1042	23.1944	22.2935	22.5147	21.097	20.4567	21.3561	0.427559	-0.9374
Q8WTT2	Q8WTT2	Nucleolar complex protein 3 homolog	NOC3L	21.5097	20.7732	20.5937	20.9589	21.1555	21.8277	22.0706	21.6846	0.137599	0.725733
Q8WTV0	Q8WTV0	Scavenger receptor class B member 1	SCARB1	21.6656	20.7461	20.4149	20.9422	21.688	20.4588	21.8099	21.3189	0.546228	0.3767
Q8WTW3	Q8WTW3	Conserved oligomeric Golgi complex subunit 1	COG1	16.6769	17.8967	16.4638	17.0125	16.9216	16.9596	16.7138	16.865	0.774093	-0.147467
Q8WU76	Q8WU76	Sec1 family domain-containing protein 2	SCFD2	19.5018	18.6831	18.3776	18.8542	18.2935	18.903	18.854	18.6835	0.688225	-0.170667
Q8WU90	Q8WU90	Zinc finger CCCH domain-containing protein 15	ZC3H15	20.4868	19.1024	21.635	20.4081	19.968	19.2421	19.8654	19.6918	0.43486	-0.716233
Q8WUA2	Q8WUA2	Peptidyl-prolyl cis-trans isomerase-like 4	PPIL4	21.1835	18.3863	19.3906	19.6535	20.8053	20.9397	21.6937	21.1462	0.202413	1.49277
Q8WUA4	Q8WUA4	General transcription factor 3C polypeptide 2	GTF3C2	17.1208	17.5551	17.9153	17.5304	18.1505	17.8906	17.504	17.8484	0.346422	0.317967
Q8WUK0	Q8WUK0	Phosphatidylglycerophosphatase and protein-tyrosine phosphatase 1	PTPMT1	22.8764	24.0463	23.7044	23.5424	23.4216	22.1307	21.6618	22.4047	0.156446	-1.13767
Q8WUM0	Q8WUM0	Nuclear pore complex protein Nup133	NUP133	20.8717	21.6079	21.3255	21.2684	21.1909	21.4741	21.4629	21.376	0.679326	0.1076
Q8WUM4	Q8WUM4	Programmed cell death 6-interacting protein	PDCD6IP	18.9697	18.3847	18.5946	18.6497	18.0985	18.5211	19.3832	18.6676	0.968435	0.0179333
Q8WVB6	Q8WVB6	Chromosome transmission fidelity protein 18 homolog	CHTF18	17.7783	17.7707	16.9213	17.4901	18.1329	16.4118	17.6223	17.389	0.873198	-0.1011
Q8WVC0	Q8WVC0	RNA polymerase-associated protein LEO1	LEO1	17.68	18.7264	19.721	18.7091	20.7508	18.5515	17.6357	18.9793	0.81947	0.2702
Q8WVM0	Q8WVM0	Dimethyladenosine transferase 1, mitochondrial	TFB1M	18.8937	15.6928	17.1592	17.2486	16.8982	19.014	18.7791	18.2304	0.442774	0.981867
Q8WVM7	Q8WVM7	Cohesin subunit SA-1	STAG1	18.387	19.1553	18.5426	18.695	17.1732	18.0389	18.6266	17.9462	0.215151	-0.748733
Q8WVM8	Q8WVM8	Sec1 family domain-containing protein 1	SCFD1	21.9484	22.1927	22.256	22.1324	22.9086	22.4832	21.9515	22.4478	0.37514	0.3154
Q8WVV9	Q8WVV9	Heterogeneous nuclear ribonucleoprotein L-like	HNRNPLL	21.0117	20.4318	21.2746	20.906	20.9459	21.6676	20.8944	21.1693	0.496699	0.263267
Q8WVX9	Q8WVX9	Fatty acyl-CoA reductase 1	FAR1	21.6591	18.9478	21.3196	20.6422	20.1755	19.6421	21.8167	20.5448	0.932435	-0.0974
Q8WWC4	Q8WWC4	m-AAA protease-interacting protein 1, mitochondrial	MAIP1	16.1709	19.208	19.1739	18.1843	17.6882	19.0265	20.0965	18.9371	0.575746	0.7528
Q8WWI1	Q8WWI1	LIM domain only protein 7	LMO7	19.0154	18.8306	19.087	18.9777	19.2668	19.6004	19.0215	19.2962	0.189061	0.318567
Q8WWI5	Q8WWI5	Choline transporter-like protein 1	SLC44A1	20.1123	17.5938	19.9775	19.2279	19.5538	18.8343	19.6061	19.3314	0.913136	0.103533
Q8WWK9	Q8WWK9	Cytoskeleton-associated protein 2	CKAP2	17.9659	18.1386	17.6414	17.9153	16.4712	17.9437	18.3888	17.6012	0.64636	-0.314067
Q8WWM7	Q8WWM7	Ataxin-2-like protein	ATXN2L	20.2004	20.8217	20.9342	20.6521	20.954	20.6105	20.5765	20.7137	0.826639	0.0615667
Q8WWQ0;Q9NSI6	Q8WWQ0	PH-interacting protein	PHIP	15.826	16.1374	16.9588	16.3074	16.7278	15.5437	14.8755	15.7157	0.415719	-0.591733
Q8WWY3	Q8WWY3	U4/U6 small nuclear ribonucleoprotein Prp31	PRPF31	22.0844	22.8457	21.9604	22.2968	21.6444	22.219	21.6253	21.8296	0.247073	-0.467267
Q8WX92	Q8WX92	Negative elongation factor B	NELFB	21.0326	20.6862	20.5948	20.7712	21.0575	20.9235	20.8229	20.9346	0.3553	0.163433
Q8WX93;Q86TC9	Q8WX93	Palladin	PALLD	23.2478	23.7119	23.5078	23.4892	23.6978	23.7351	23.1656	23.5328	0.858108	0.0436667
Q8WXA9	Q8WXA9	Splicing regulatory glutamine/lysine-rich protein 1	SREK1	19.8586	22.2921	21.8606	21.3371	22.1838	16.0381	19.1383	19.1201	0.341602	-2.21703
Q8WXF1	Q8WXF1	Paraspeckle component 1	PSPC1	23.7809	24.6107	24.6091	24.3336	25.0003	25.167	24.1734	24.7802	0.341152	0.446667
Q8WXI7	Q8WXI7	Mucin-16	MUC16	19.4504	17.0592	16.846	17.7852	20.4038	17.3407	18.5542	18.7662	0.466812	0.981033
Q8WY36	Q8WY36	HMG box transcription factor BBX	BBX	22.8164	16.282	23.4453	20.8479	17.2507	23.603	22.8525	21.2354	0.904925	0.3875
Q8WYA6	Q8WYA6	Beta-catenin-like protein 1	CTNNBL1	23.4626	23.5136	23.7011	23.5591	23.9226	23.4875	23.3693	23.5931	0.865601	0.0340333
Q92466	Q92466	DNA damage-binding protein 2	DDB2	23.0371	23.2277	23.1756	23.1468	23.4365	23.4832	23.0396	23.3198	0.347366	0.172967
Q92499	Q92499	ATP-dependent RNA helicase DDX1	DDX1	25.5422	26.3223	25.9965	25.9537	26.2637	26.0076	25.6891	25.9868	0.912209	0.0331333
Q92522	Q92522	Histone H1.10	H1-10	25.2367	25.6134	25.5459	25.4653	25.812	25.6435	25.3409	25.5988	0.500962	0.133467
Q92526	Q92526	T-complex protein 1 subunit zeta-2	CCT6B	23.9	17.5772	16.968	19.4817	17.6448	24.3481	15.617	19.2033	0.939583	-0.278433
Q92538	Q92538	Golgi-specific brefeldin A-resistance guanine nucleotide exchange factor 1	GBF1	14.8008	16.6789	16.5	15.9932	16.8702	17.3443	17.1346	17.1164	0.196712	1.12313
Q92541	Q92541	RNA polymerase-associated protein RTF1 homolog	RTF1	20.3332	21.4634	21.1931	20.9966	21.8268	21.7451	21.294	21.622	0.200635	0.6254
Q92542	Q92542	Nicastrin	NCSTN	21.9467	21.5344	21.7712	21.7508	21.4879	21.0264	22.0756	21.53	0.553738	-0.2208
Q92544	Q92544	Transmembrane 9 superfamily member 4	TM9SF4	19.9362	18.2168	18.5325	18.8952	18.3248	19.8125	21.0665	19.7346	0.434704	0.839433
Q92552	Q92552	Small ribosomal subunit protein mS27	MRPS27	21.4483	21.6586	21.4463	21.5177	21.8055	21.3172	21.2883	21.4703	0.813182	-0.0474
Q92572	Q92572	AP-3 complex subunit sigma-1	AP3S1	22.4399	22.7982	22.5767	22.6049	22.4241	22.4781	21.8941	22.2654	0.206029	-0.3395
Q92574	Q92574	Hamartin	TSC1	17.2396	16.9886	17.6681	17.2988	18.4997	16.5571	15.2085	16.7551	0.629452	-0.543667
Q92597	Q92597	Protein NDRG1	NDRG1	23.1855	22.4696	22.7116	22.7889	23.6846	23.2663	22.936	23.2956	0.168573	0.506733
Q92598	Q92598	Heat shock protein 105 kDa	HSPH1	23.1773	23.7547	23.2506	23.3942	23.4153	23.3961	23.3467	23.386	0.968308	-0.00816667
Q92599	Q92599	Septin-8	SEPTIN8	22.0652	23.2714	23.1779	22.8382	23.2498	22.8556	22.2575	22.7876	0.922106	-0.0505333
[truncated: 826 more rows]

## Sheet: OriginData
Protein IDs	Majority protein IDs	Protein names	Gene names	Fasta headers	Identification type C1	Identification type C2	Identification type C3	Identification type C4	Identification type S1	Identification type S2	Identification type S3	Identification type S4	iBAQ peptides	iBAQ	iBAQ C1	iBAQ C2	iBAQ C3	iBAQ C4	iBAQ S1	iBAQ S2	iBAQ S3	iBAQ S4
P0DPI3;A0A0U1RRI6;A0A0U1RR11	P0DPI3;A0A0U1RRI6;A0A0U1RR11	Centromere protein V-like protein 2;Centromere protein V-like protein 3;Centromere protein V-like protein 1	CENPVL2;CENPVL3;CENPVL1	sp|P0DPI3|CENL2_HUMAN Centromere protein V-like protein 2 OS=Homo sapiens OX=9606 GN=CENPVL2 PE=3 SV=1;sp|A0A0U1RRI6|CENL3_HUMAN Centromere protein V-like protein 3 OS=Homo sapiens OX=9606 GN=CENPVL3 PE=1 SV=2;sp|A0A0U1RR11|CENL1_HUMAN Centromere protein V	None	None	None	By MS/MS	By matching	None	By matching	None	15	3324000	0	0	0	963960	1404900	0	955130	0
A0A1B0GVH6	A0A1B0GVH6	Uncharacterized protein C13orf42	C13orf42	sp|A0A1B0GVH6|CM042_HUMAN Uncharacterized protein C13orf42 OS=Homo sapiens OX=9606 GN=C13orf42 PE=4 SV=1	None	None	None	None	None	By MS/MS	None	None	13	489490	0	0	0	0	0	489490	0	0
A0A1B0GVZ6;Q8NHZ7;A6NJ08;A6NE82;A6NDZ8	A0A1B0GVZ6;Q8NHZ7;A6NJ08;A6NE82;A6NDZ8	Methyl-CpG-binding domain protein 3-like 2B;Methyl-CpG-binding domain protein 3-like 2;Putative methyl-CpG-binding domain protein 3-like 5;Putative methyl-CpG-binding domain protein 3-like 3;Putative methyl-CpG-binding domain protein 3-like 4	MBD3L2B;MBD3L2;MBD3L5;MBD3L3;MBD3L4	sp|A0A1B0GVZ6|MB3LB_HUMAN Methyl-CpG-binding domain protein 3-like 2B OS=Homo sapiens OX=9606 GN=MBD3L2B PE=3 SV=1;sp|Q8NHZ7|MB3L2_HUMAN Methyl-CpG-binding domain protein 3-like 2 OS=Homo sapiens OX=9606 GN=MBD3L2 PE=1 SV=3;sp|A6NJ08|MB3L5_HUMAN Putative m	By MS/MS	By MS/MS	By MS/MS	By matching	By matching	By MS/MS	By MS/MS	None	6	56934000	6168800	13334000	12776000	1846200	1190800	12330000	9288000	0
A0A494C071	A0A494C071	PWWP domain-containing DNA repair factor 4	PWWP4	sp|A0A494C071|PWWP4_HUMAN PWWP domain-containing DNA repair factor 4 OS=Homo sapiens OX=9606 GN=PWWP4 PE=1 SV=1	By MS/MS	By MS/MS	By MS/MS	None	None	By MS/MS	By matching	By MS/MS	102	7816100	1009100	2200200	1982400	0	0	1779500	433550	411490
A0FGR8	A0FGR8	Extended synaptotagmin-2	ESYT2	sp|A0FGR8|ESYT2_HUMAN Extended synaptotagmin-2 OS=Homo sapiens OX=9606 GN=ESYT2 PE=1 SV=1	By MS/MS	By matching	None	By MS/MS	By MS/MS	None	None	By MS/MS	45	6299200	871040	187750	0	2626400	1222100	0	0	1391900
A0JLT2	A0JLT2	Mediator of RNA polymerase II transcription subunit 19	MED19	sp|A0JLT2|MED19_HUMAN Mediator of RNA polymerase II transcription subunit 19 OS=Homo sapiens OX=9606 GN=MED19 PE=1 SV=2	None	None	None	By MS/MS	By matching	None	None	By matching	8	9448600	0	0	0	2508700	4401500	0	0	2538400
A1L0T0	A1L0T0	2-hydroxyacyl-CoA lyase 2	ILVBL	sp|A1L0T0|HACL2_HUMAN 2-hydroxyacyl-CoA lyase 2 OS=Homo sapiens OX=9606 GN=ILVBL PE=1 SV=2	By MS/MS	By matching	By matching	By MS/MS	By MS/MS	By matching	By matching	By MS/MS	25	9456600	228710	112590	362850	3038000	5007000	365770	2504000	820050
A2A3N6;O60331	A2A3N6	Putative PIP5K1A and PSMD4-like protein	PIPSL	sp|A2A3N6|PIPSL_HUMAN Putative PIP5K1A and PSMD4-like protein OS=Homo sapiens OX=9606 GN=PIPSL PE=5 SV=1	By MS/MS	By MS/MS	By MS/MS	By MS/MS	By MS/MS	By matching	By MS/MS	By MS/MS	31	6120000	711600	234820	524270	1292900	1517400	705540	374530	758960
A2RRP1	A2RRP1	NBAS subunit of NRZ tethering complex	NBAS	sp|A2RRP1|NBAS_HUMAN NBAS subunit of NRZ tethering complex OS=Homo sapiens OX=9606 GN=NBAS PE=1 SV=2	By matching	By MS/MS	By MS/MS	By MS/MS	By MS/MS	By MS/MS	By MS/MS	By MS/MS	110	752380	56724	39408	42073	174830	177650	75582	72992	113120
A3KN83;Q9Y2G9	A3KN83;Q9Y2G9	Protein strawberry notch homolog 1;Protein strawberry notch homolog 2	SBNO1;SBNO2	sp|A3KN83|SBNO1_HUMAN Protein strawberry notch homolog 1 OS=Homo sapiens OX=9606 GN=SBNO1 PE=1 SV=1;sp|Q9Y2G9|SBNO2_HUMAN Protein strawberry notch homolog 2 OS=Homo sapiens OX=9606 GN=SBNO2 PE=1 SV=3	By MS/MS	By MS/MS	By MS/MS	By MS/MS	By MS/MS	By MS/MS	By MS/MS	By MS/MS	64	12116000	1438500	3046500	2947200	278270	272840	2324700	956580	851880
A4D1E9	A4D1E9	GTP-binding protein 10	GTPBP10	sp|A4D1E9|GTPBA_HUMAN GTP-binding protein 10 OS=Homo sapiens OX=9606 GN=GTPBP10 PE=1 SV=1	By MS/MS	By MS/MS	By MS/MS	By MS/MS	By MS/MS	None	None	By matching	25	6538900	211200	146490	150580	1953400	2865100	0	0	1212100
A4UGR9	A4UGR9	Xin actin-binding repeat-containing protein 2	XIRP2	sp|A4UGR9|XIRP2_HUMAN Xin actin-binding repeat-containing protein 2 OS=Homo sapiens OX=9606 GN=XIRP2 PE=1 SV=2	None	None	None	By MS/MS	By MS/MS	None	By MS/MS	None	190	435610	0	0	0	923210	284600	0	151010	0
A5YKK6	A5YKK6	CCR4-NOT transcription complex subunit 1	CNOT1	sp|A5YKK6|CNOT1_HUMAN CCR4-NOT transcription complex subunit 1 OS=Homo sapiens OX=9606 GN=CNOT1 PE=1 SV=2	By MS/MS	By MS/MS	By MS/MS	By MS/MS	By MS/MS	By MS/MS	By MS/MS	By MS/MS	120	10763000	1093600	646040	760810	2185100	2122400	636170	1349600	1969700
A6NCE7;Q9GZQ8;Q9H492	A6NCE7;Q9GZQ8;Q9H492	Microtubule-associated proteins 1A/1B light chain 3 beta 2;Microtubule-associated proteins 1A/1B light chain 3B;Microtubule-associated proteins 1A/1B light chain 3A	MAP1LC3B2;MAP1LC3B;MAP1LC3A	sp|A6NCE7|MP3B2_HUMAN Microtubule-associated proteins 1A/1B light chain 3 beta 2 OS=Homo sapiens OX=9606 GN=MAP1LC3B2 PE=1 SV=1;sp|Q9GZQ8|MLP3B_HUMAN Microtubule-associated proteins 1A/1B light chain 3B OS=Homo sapiens OX=9606 GN=MAP1LC3B PE=1 SV=3;sp|Q9H4	By MS/MS	By MS/MS	By MS/MS	By MS/MS	By MS/MS	By MS/MS	By MS/MS	By MS/MS	4	141660000	12471000	9026700	6878100	43171000	19955000	10358000	14866000	24937000
A6NHQ2	A6NHQ2	rRNA/tRNA 2-O-methyltransferase fibrillarin-like protein 1	FBLL1	sp|A6NHQ2|FBLL1_HUMAN rRNA/tRNA 2-O-methyltransferase fibrillarin-like protein 1 OS=Homo sapiens OX=9606 GN=FBLL1 PE=1 SV=2	By MS/MS	By matching	By matching	By matching	By matching	By matching	By MS/MS	By MS/MS	18	0	0	0	0	0	0	0	0	0
A6NHR9	A6NHR9	Structural maintenance of chromosomes flexible hinge domain-containing protein 1	SMCHD1	sp|A6NHR9|SMHD1_HUMAN Structural maintenance of chromosomes flexible hinge domain-containing protein 1 OS=Homo sapiens OX=9606 GN=SMCHD1 PE=1 SV=2	By MS/MS	By MS/MS	By MS/MS	By MS/MS	By MS/MS	By MS/MS	By MS/MS	By MS/MS	105	20833000	1577400	749020	648460	4691000	6138700	1237300	2149000	3641800
A6NK44	A6NK44	Glyoxalase domain-containing protein 5	GLOD5	sp|A6NK44|GLOD5_HUMAN Glyoxalase domain-containing protein 5 OS=Homo sapiens OX=9606 GN=GLOD5 PE=1 SV=3	None	None	By MS/MS	None	None	None	None	None	10	31767000	0	0	31767000	0	0	0	0	0
A6NKT7;Q7Z3J3;Q99666;O14715;P0DJD0;P0DJD1	A6NKT7;Q7Z3J3;Q99666;O14715;P0DJD0;P0DJD1	RanBP2-like and GRIP domain-containing protein 3;RanBP2-like and GRIP domain-containing protein 4;RANBP2-like and GRIP domain-containing protein 5/6;RANBP2-like and GRIP domain-containing protein 8;RANBP2-like and GRIP domain-containing protein 1;RANBP2-like and GRIP domain-containing protein 2	RGPD3;RGPD4;RGPD5;RGPD8;RGPD1;RGPD2	sp|A6NKT7|RGPD3_HUMAN RanBP2-like and GRIP domain-containing protein 3 OS=Homo sapiens OX=9606 GN=RGPD3 PE=1 SV=2;sp|Q7Z3J3|RGPD4_HUMAN RanBP2-like and GRIP domain-containing protein 4 OS=Homo sapiens OX=9606 GN=RGPD4 PE=1 SV=3;sp|Q99666|RGPD5_HUMAN RANBP2	By MS/MS	By MS/MS	By MS/MS	By MS/MS	By MS/MS	By MS/MS	By MS/MS	By MS/MS	88	3017500	264140	89760	266980	617930	739960	419620	615690	93148
A6NMZ7	A6NMZ7	Collagen alpha-6(VI) chain	COL6A6	sp|A6NMZ7|CO6A6_HUMAN Collagen alpha-6(VI) chain OS=Homo sapiens OX=9606 GN=COL6A6 PE=1 SV=2	None	None	None	None	By MS/MS	None	By MS/MS	By MS/MS	111	346040	0	0	0	0	346040	0	405450	447630
P62308;A8MWD9	P62308;A8MWD9	Small nuclear ribonucleoprotein G;Putative small nuclear ribonucleoprotein G-like protein 15	SNRPG;SNRPGP15	sp|P62308|RUXG_HUMAN Small nuclear ribonucleoprotein G OS=Homo sapiens OX=9606 GN=SNRPG PE=1 SV=1;sp|A8MWD9|RUXGL_HUMAN Putative small nuclear ribonucleoprotein G-like protein 15 OS=Homo sapiens OX=9606 GN=SNRPGP15 PE=5 SV=2	By MS/MS	By MS/MS	By MS/MS	By matching	By MS/MS	By MS/MS	By MS/MS	By MS/MS	3	553270000	59653000	46019000	37232000	79030000	51612000	50775000	116320000	112630000
E9PAV3;Q13765;Q9BZK3	E9PAV3;Q13765	Nascent polypeptide-associated complex subunit alpha, muscle-specific form;Nascent polypeptide-associated complex subunit alpha	NACA	sp|E9PAV3|NACAM_HUMAN Nascent polypeptide-associated complex subunit alpha, muscle-specific form OS=Homo sapiens OX=9606 GN=NACA PE=1 SV=1;sp|Q13765|NACA_HUMAN Nascent polypeptide-associated complex subunit alpha OS=Homo sapiens OX=9606 GN=NACA PE=1 SV=1	By MS/MS	By MS/MS	By MS/MS	By MS/MS	By MS/MS	By MS/MS	By MS/MS	By MS/MS	103	68581000	6960000	7522800	6663400	6171800	7092200	9239700	13521000	11411000
E9PRG8	E9PRG8	Uncharacterized protein C11orf98	C11orf98	sp|E9PRG8|CK098_HUMAN Uncharacterized protein C11orf98 OS=Homo sapiens OX=9606 GN=C11orf98 PE=1 SV=2	By MS/MS	By MS/MS	By matching	By MS/MS	By MS/MS	By matching	By MS/MS	By MS/MS	6	197080000	16830000	7482800	5013000	52375000	39880000	7897900	32144000	35459000
O00116	O00116	Alkyldihydroxyacetonephosphate synthase, peroxisomal	AGPS	sp|O00116|ADAS_HUMAN Alkyldihydroxyacetonephosphate synthase, peroxisomal OS=Homo sapiens OX=9606 GN=AGPS PE=1 SV=1	By MS/MS	By MS/MS	By MS/MS	By MS/MS	By MS/MS	By MS/MS	By MS/MS	By MS/MS	34	142660000	8606400	5456000	9621500	35170000	38290000	8494900	15187000	21833000
O00139	O00139	Kinesin-like protein KIF2A	KIF2A	sp|O00139|KIF2A_HUMAN Kinesin-like protein KIF2A OS=Homo sapiens OX=9606 GN=KIF2A PE=1 SV=3	By matching	By matching	By matching	By MS/MS	By MS/MS	By matching	By matching	By MS/MS	34	1131100	193080	0	0	438760	499250	0	0	272640
O00148	O00148	ATP-dependent RNA helicase DDX39A	DDX39A	sp|O00148|DX39A_HUMAN ATP-dependent RNA helicase DDX39A OS=Homo sapiens OX=9606 GN=DDX39A PE=1 SV=2	By MS/MS	By MS/MS	By MS/MS	By MS/MS	By MS/MS	By MS/MS	By MS/MS	By MS/MS	21	52124000	3093400	3151800	3606600	9549900	11801000	5322400	7712000	7886500
O00159	O00159	Unconventional myosin-Ic	MYO1C	sp|O00159|MYO1C_HUMAN Unconventional myosin-Ic OS=Homo sapiens OX=9606 GN=MYO1C PE=1 SV=4	By MS/MS	By MS/MS	By MS/MS	By MS/MS	By MS/MS	By MS/MS	By MS/MS	By MS/MS	57	365660000	32390000	31267000	31003000	64861000	71230000	32382000	43355000	59174000
O00161	O00161	Synaptosomal-associated protein 23	SNAP23	sp|O00161|SNP23_HUMAN Synaptosomal-associated protein 23 OS=Homo sapiens OX=9606 GN=SNAP23 PE=1 SV=1	By MS/MS	By matching	By matching	By MS/MS	By MS/MS	By matching	By matching	By MS/MS	12	36730000	3478700	1546300	2370500	8088600	8315000	1604800	2019300	9306400
O00165	O00165	HCLS1-associated protein X-1	HAX1	sp|O00165|HAX1_HUMAN HCLS1-associated protein X-1 OS=Homo sapiens OX=9606 GN=HAX1 PE=1 SV=2	By MS/MS	By matching	By MS/MS	By matching	By matching	By matching	By MS/MS	By matching	16	18653000	1513200	1148400	2097200	2407700	2269100	2655300	3745200	2817100
O00178	O00178	GTP-binding protein 1	GTPBP1	sp|O00178|GTPB1_HUMAN GTP-binding protein 1 OS=Homo sapiens OX=9606 GN=GTPBP1 PE=1 SV=3	None	None	None	By MS/MS	By MS/MS	By matching	By matching	By MS/MS	28	1733000	0	0	0	442720	393140	304910	291260	300990
O00186	O00186	Syntaxin-binding protein 3	STXBP3	sp|O00186|STXB3_HUMAN Syntaxin-binding protein 3 OS=Homo sapiens OX=9606 GN=STXBP3 PE=1 SV=2	By MS/MS	By MS/MS	By MS/MS	By MS/MS	By MS/MS	By MS/MS	By MS/MS	By MS/MS	30	24510000	3160900	3062600	2544600	2456100	3652600	2456400	3102000	4074800
O00192	O00192	Splicing regulator ARVCF	ARVCF	sp|O00192|ARVC_HUMAN Splicing regulator ARVCF OS=Homo sapiens OX=9606 GN=ARVCF PE=1 SV=1	By MS/MS	By MS/MS	By MS/MS	By MS/MS	By matching	By MS/MS	By matching	By MS/MS	46	6989100	712870	203040	393150	2070300	2124100	314440	798370	372960
O00193	O00193	Small acidic protein	SMAP	sp|O00193|SMAP_HUMAN Small acidic protein OS=Homo sapiens OX=9606 GN=SMAP PE=1 SV=1	By matching	By matching	By matching	By MS/MS	By matching	By matching	By MS/MS	By MS/MS	5	32920000	2170000	2758400	1290200	6589800	5358200	2177500	6788900	8545600
O00203	O00203	AP-3 complex subunit beta-1	AP3B1	sp|O00203|AP3B1_HUMAN AP-3 complex subunit beta-1 OS=Homo sapiens OX=9606 GN=AP3B1 PE=1 SV=3	By MS/MS	By MS/MS	By MS/MS	By MS/MS	By MS/MS	By MS/MS	By MS/MS	By MS/MS	57	32370000	4172000	3016100	2324100	5203600	6436200	1597300	3250500	6370100
O00214	O00214	Galectin-8	LGALS8	sp|O00214|LEG8_HUMAN Galectin-8 OS=Homo sapiens OX=9606 GN=LGALS8 PE=1 SV=4	By MS/MS	By MS/MS	By MS/MS	By MS/MS	By MS/MS	By MS/MS	By MS/MS	By MS/MS	19	1.6625e+09	188930000	308230000	329960000	53775000	55090000	340200000	207630000	178710000
O00217	O00217	NADH dehydrogenase [ubiquinone] iron-sulfur protein 8, mitochondrial	NDUFS8	sp|O00217|NDUS8_HUMAN NADH dehydrogenase [ubiquinone] iron-sulfur protein 8, mitochondrial OS=Homo sapiens OX=9606 GN=NDUFS8 PE=1 SV=1	By MS/MS	By MS/MS	By MS/MS	By MS/MS	By MS/MS	By MS/MS	By MS/MS	By MS/MS	13	61165000	5673900	4731200	3951200	8404800	10391000	5265700	9235800	13511000
O00231	O00231	26S proteasome non-ATPase regulatory subunit 11	PSMD11	sp|O00231|PSD11_HUMAN 26S proteasome non-ATPase regulatory subunit 11 OS=Homo sapiens OX=9606 GN=PSMD11 PE=1 SV=3	By MS/MS	By MS/MS	By MS/MS	By MS/MS	By MS/MS	By MS/MS	By MS/MS	By MS/MS	27	129450000	6943000	7875300	9225900	21818000	30555000	11743000	20484000	20801000
O00232	O00232	26S proteasome non-ATPase regulatory subunit 12	PSMD12	sp|O00232|PSD12_HUMAN 26S proteasome non-ATPase regulatory subunit 12 OS=Homo sapiens OX=9606 GN=PSMD12 PE=1 SV=3	By MS/MS	By MS/MS	By MS/MS	By MS/MS	By MS/MS	By MS/MS	By MS/MS	By MS/MS	25	53196000	3728800	3589300	2225000	10260000	12373000	4736900	6500600	9783200
O00255	O00255	Menin	MEN1	sp|O00255|MEN1_HUMAN Menin OS=Homo sapiens OX=9606 GN=MEN1 PE=1 SV=5	None	None	None	By MS/MS	By matching	None	None	None	28	688970	0	0	0	259680	429290	0	0	0
O00264	O00264	Membrane-associated progesterone receptor component 1	PGRMC1	sp|O00264|PGRC1_HUMAN Membrane-associated progesterone receptor component 1 OS=Homo sapiens OX=9606 GN=PGRMC1 PE=1 SV=3	By MS/MS	By MS/MS	By MS/MS	By MS/MS	By MS/MS	By MS/MS	By MS/MS	By MS/MS	8	336060000	24076000	2275400	3119400	103280000	121390000	17375000	12732000	51809000
O00267	O00267	Transcription elongation factor SPT5	SUPT5H	sp|O00267|SPT5H_HUMAN Transcription elongation factor SPT5 OS=Homo sapiens OX=9606 GN=SUPT5H PE=1 SV=1	By MS/MS	By MS/MS	By MS/MS	By MS/MS	By MS/MS	By MS/MS	By MS/MS	By MS/MS	51	117860000	7959600	8723400	8863000	16809000	17903000	13296000	22655000	21647000
O00268	O00268	Transcription initiation factor TFIID subunit 4	TAF4	sp|O00268|TAF4_HUMAN Transcription initiation factor TFIID subunit 4 OS=Homo sapiens OX=9606 GN=TAF4 PE=1 SV=2	None	None	None	By MS/MS	By MS/MS	None	None	None	34	987580	0	0	0	434310	553270	0	0	0
O00299	O00299	Chloride intracellular channel protein 1	CLIC1	sp|O00299|CLIC1_HUMAN Chloride intracellular channel protein 1 OS=Homo sapiens OX=9606 GN=CLIC1 PE=1 SV=4	By MS/MS	By matching	By MS/MS	By MS/MS	By MS/MS	By MS/MS	By MS/MS	By MS/MS	15	42494000	4530400	3721700	5382800	4687700	4097600	5101300	7348500	7623900
O00303	O00303	Eukaryotic translation initiation factor 3 subunit F	EIF3F	sp|O00303|EIF3F_HUMAN Eukaryotic translation initiation factor 3 subunit F OS=Homo sapiens OX=9606 GN=EIF3F PE=1 SV=1	By MS/MS	By MS/MS	By MS/MS	By MS/MS	By MS/MS	By MS/MS	By MS/MS	By MS/MS	15	710330000	69273000	79290000	79793000	97503000	80453000	85241000	100100000	118680000
O00330	O00330	Pyruvate dehydrogenase protein X component, mitochondrial	PDHX	sp|O00330|ODPX_HUMAN Pyruvate dehydrogenase protein X component, mitochondrial OS=Homo sapiens OX=9606 GN=PDHX PE=1 SV=3	By MS/MS	By matching	By MS/MS	By MS/MS	By MS/MS	By matching	By MS/MS	By MS/MS	22	18903000	1501100	1118000	1233300	3284300	4394900	1885900	2252800	3232800
O00410	O00410	Importin-5	IPO5	sp|O00410|IPO5_HUMAN Importin-5 OS=Homo sapiens OX=9606 GN=IPO5 PE=1 SV=4	By MS/MS	By matching	By matching	By MS/MS	By MS/MS	By matching	By MS/MS	By MS/MS	53	14883000	1199200	666470	779810	2915200	4207100	587650	1070700	3456900
O00411	O00411	DNA-directed RNA polymerase, mitochondrial	POLRMT	sp|O00411|RPOM_HUMAN DNA-directed RNA polymerase, mitochondrial OS=Homo sapiens OX=9606 GN=POLRMT PE=1 SV=2	None	None	None	By MS/MS	By MS/MS	None	None	By matching	57	1587600	0	0	0	651460	778700	0	0	157440
O00422	O00422	Histone deacetylase complex subunit SAP18	SAP18	sp|O00422|SAP18_HUMAN Histone deacetylase complex subunit SAP18 OS=Homo sapiens OX=9606 GN=SAP18 PE=1 SV=1	By MS/MS	By MS/MS	By MS/MS	By MS/MS	By MS/MS	By MS/MS	By MS/MS	By MS/MS	12	158150000	11599000	8525100	7865100	36548000	28685000	7995200	25840000	31094000
O00425	O00425	Insulin-like growth factor 2 mRNA-binding protein 3	IGF2BP3	sp|O00425|IF2B3_HUMAN Insulin-like growth factor 2 mRNA-binding protein 3 OS=Homo sapiens OX=9606 GN=IGF2BP3 PE=1 SV=2	By MS/MS	By MS/MS	By MS/MS	By MS/MS	By MS/MS	By MS/MS	By MS/MS	By MS/MS	29	50679000	4368300	3431000	4821300	7581000	8562000	4429500	8827400	8658600
O00429	O00429	Dynamin-1-like protein	DNM1L	sp|O00429|DNM1L_HUMAN Dynamin-1-like protein OS=Homo sapiens OX=9606 GN=DNM1L PE=1 SV=2	By matching	By matching	By matching	By MS/MS	By MS/MS	By MS/MS	By MS/MS	By matching	50	4128800	283810	224060	291190	838260	936770	313070	784070	457550
O00443	O00443	Phosphatidylinositol 4-phosphate 3-kinase C2 domain-containing subunit alpha	PIK3C2A	sp|O00443|P3C2A_HUMAN Phosphatidylinositol 4-phosphate 3-kinase C2 domain-containing subunit alpha OS=Homo sapiens OX=9606 GN=PIK3C2A PE=1 SV=2	By MS/MS	By MS/MS	By MS/MS	By MS/MS	By MS/MS	By MS/MS	By MS/MS	By MS/MS	95	1237100	157520	140160	591820	332140	296900	106670	76896	126870
O00469	O00469	Procollagen-lysine,2-oxoglutarate 5-dioxygenase 2	PLOD2	sp|O00469|PLOD2_HUMAN Procollagen-lysine,2-oxoglutarate 5-dioxygenase 2 OS=Homo sapiens OX=9606 GN=PLOD2 PE=1 SV=2	By MS/MS	By MS/MS	By MS/MS	By MS/MS	By MS/MS	By MS/MS	By MS/MS	By MS/MS	37	14858000	1626200	1703100	745030	1973100	3506100	1196900	1641700	2465600
O00471	O00471	Exocyst complex component 5	EXOC5	sp|O00471|EXOC5_HUMAN Exocyst complex component 5 OS=Homo sapiens OX=9606 GN=EXOC5 PE=1 SV=1	By MS/MS	By MS/MS	By MS/MS	By MS/MS	By MS/MS	By MS/MS	By MS/MS	By MS/MS	41	8082700	580520	961540	853890	734810	1318300	1114300	1029900	1489500
O00487	O00487	26S proteasome non-ATPase regulatory subunit 14	PSMD14	sp|O00487|PSDE_HUMAN 26S proteasome non-ATPase regulatory subunit 14 OS=Homo sapiens OX=9606 GN=PSMD14 PE=1 SV=1	By MS/MS	By MS/MS	By matching	By MS/MS	By MS/MS	By MS/MS	By MS/MS	By MS/MS	14	77059000	6711200	5733100	6101200	7705300	13075000	12307000	11782000	13644000
O00505	O00505	Importin subunit alpha-4	KPNA3	sp|O00505|IMA4_HUMAN Importin subunit alpha-4 OS=Homo sapiens OX=9606 GN=KPNA3 PE=1 SV=2	By MS/MS	By MS/MS	By MS/MS	By MS/MS	By MS/MS	By MS/MS	By MS/MS	By MS/MS	16	73436000	6240400	6126700	7330200	11142000	10617000	6698400	12968000	12313000
O00506;Q9Y6E0;Q9P289	O00506;Q9Y6E0;Q9P289	Serine/threonine-protein kinase 25;Serine/threonine-protein kinase 24;Serine/threonine-protein kinase 24 36 kDa subunit;Serine/threonine-protein kinase 24 12 kDa subunit;Serine/threonine-protein kinase 26	STK25;STK24;STK26	sp|O00506|STK25_HUMAN Serine/threonine-protein kinase 25 OS=Homo sapiens OX=9606 GN=STK25 PE=1 SV=1;sp|Q9Y6E0|STK24_HUMAN Serine/threonine-protein kinase 24 OS=Homo sapiens OX=9606 GN=STK24 PE=1 SV=1;sp|Q9P289|STK26_HUMAN Serine/threonine-protein kinase 26	By MS/MS	By MS/MS	By MS/MS	By MS/MS	By MS/MS	By MS/MS	By MS/MS	By MS/MS	21	14779000	1860900	2007100	2308600	1714200	2220400	886540	2368000	1413300
O00541	O00541	Pescadillo homolog	PES1	sp|O00541|PESC_HUMAN Pescadillo homolog OS=Homo sapiens OX=9606 GN=PES1 PE=1 SV=1	By MS/MS	By MS/MS	By MS/MS	By MS/MS	By MS/MS	By MS/MS	By MS/MS	By MS/MS	29	196820000	13319000	11610000	13519000	41886000	49919000	12992000	23869000	29706000
O00560	O00560	Syntenin-1	SDCBP	sp|O00560|SDCB1_HUMAN Syntenin-1 OS=Homo sapiens OX=9606 GN=SDCBP PE=1 SV=1	By MS/MS	By MS/MS	By MS/MS	By MS/MS	By MS/MS	By MS/MS	By MS/MS	By MS/MS	9	133740000	12186000	9308400	12090000	18870000	12292000	13471000	29736000	25790000
O00566	O00566	U3 small nucleolar ribonucleoprotein protein MPP10	MPHOSPH10	sp|O00566|MPP10_HUMAN U3 small nucleolar ribonucleoprotein protein MPP10 OS=Homo sapiens OX=9606 GN=MPHOSPH10 PE=1 SV=2	By MS/MS	By MS/MS	By MS/MS	By MS/MS	By MS/MS	By MS/MS	By MS/MS	By MS/MS	27	43733000	3894200	3265500	4862200	7559000	9459200	2596400	4328300	7768300
O00567	O00567	Nucleolar protein 56	NOP56	sp|O00567|NOP56_HUMAN Nucleolar protein 56 OS=Homo sapiens OX=9606 GN=NOP56 PE=1 SV=4	By MS/MS	By MS/MS	By MS/MS	By MS/MS	By MS/MS	By MS/MS	By MS/MS	By MS/MS	31	304360000	18131000	10101000	13407000	92594000	99091000	15327000	16929000	38778000
O00571;O15523;Q9NQI0	O00571;O15523	ATP-dependent RNA helicase DDX3X;ATP-dependent RNA helicase DDX3Y	DDX3X;DDX3Y	sp|O00571|DDX3X_HUMAN ATP-dependent RNA helicase DDX3X OS=Homo sapiens OX=9606 GN=DDX3X PE=1 SV=3;sp|O15523|DDX3Y_HUMAN ATP-dependent RNA helicase DDX3Y OS=Homo sapiens OX=9606 GN=DDX3Y PE=1 SV=2	By MS/MS	By MS/MS	By MS/MS	By MS/MS	By MS/MS	By MS/MS	By MS/MS	By MS/MS	39	345640000	26028000	26085000	20014000	65108000	75743000	28004000	45329000	59333000
O00592	O00592	Podocalyxin	PODXL	sp|O00592|PODXL_HUMAN Podocalyxin OS=Homo sapiens OX=9606 GN=PODXL PE=1 SV=2	By MS/MS	By matching	By matching	By MS/MS	By MS/MS	By MS/MS	By MS/MS	By MS/MS	21	52070000	3555400	701380	1507900	17949000	18914000	1536300	1453500	6452800
O00629	O00629	Importin subunit alpha-3	KPNA4	sp|O00629|IMA3_HUMAN Importin subunit alpha-3 OS=Homo sapiens OX=9606 GN=KPNA4 PE=1 SV=1	By MS/MS	By MS/MS	By MS/MS	By MS/MS	By MS/MS	By MS/MS	By MS/MS	By MS/MS	15	158080000	14746000	15379000	15203000	22742000	23164000	19288000	25868000	21694000
O00743	O00743	Serine/threonine-protein phosphatase 6 catalytic subunit;Serine/threonine-protein phosphatase 6 catalytic subunit, N-terminally processed	PPP6C	sp|O00743|PPP6_HUMAN Serine/threonine-protein phosphatase 6 catalytic subunit OS=Homo sapiens OX=9606 GN=PPP6C PE=1 SV=1	By MS/MS	By MS/MS	By MS/MS	By MS/MS	By MS/MS	By MS/MS	By MS/MS	By MS/MS	16	37756000	3077100	3637900	2233700	4773000	4455300	3378100	9847200	6354200
O00767	O00767	Stearoyl-CoA desaturase	SCD	sp|O00767|SCD_HUMAN Stearoyl-CoA desaturase OS=Homo sapiens OX=9606 GN=SCD PE=1 SV=2	By matching	None	None	By MS/MS	By MS/MS	None	None	None	13	9309500	1493600	0	0	5411500	2404400	0	0	0
O14495	O14495	Phospholipid phosphatase 3	PLPP3	sp|O14495|PLPP3_HUMAN Phospholipid phosphatase 3 OS=Homo sapiens OX=9606 GN=PLPP3 PE=1 SV=1	By matching	By matching	By matching	By MS/MS	By MS/MS	None	None	By matching	13	4946800	404410	537770	948080	1068500	1321300	0	0	666780
O14497;Q8NFD5	O14497	AT-rich interactive domain-containing protein 1A	ARID1A	sp|O14497|ARI1A_HUMAN AT-rich interactive domain-containing protein 1A OS=Homo sapiens OX=9606 GN=ARID1A PE=1 SV=3	By matching	By MS/MS	By matching	By MS/MS	By MS/MS	By MS/MS	By MS/MS	By MS/MS	70	2874500	194180	208240	221900	389080	449020	289480	614630	507980
O14556	O14556	Glyceraldehyde-3-phosphate dehydrogenase, testis-specific	GAPDHS	sp|O14556|G3PT_HUMAN Glyceraldehyde-3-phosphate dehydrogenase, testis-specific OS=Homo sapiens OX=9606 GN=GAPDHS PE=1 SV=2	By MS/MS	By MS/MS	By MS/MS	By MS/MS	By MS/MS	By MS/MS	By MS/MS	By MS/MS	18	515100000	60670000	106380000	89180000	17463000	19700000	110880000	61166000	49656000
O14578	O14578	Citron Rho-interacting kinase	CIT	sp|O14578|CTRO_HUMAN Citron Rho-interacting kinase OS=Homo sapiens OX=9606 GN=CIT PE=1 SV=2	By matching	By MS/MS	None	By matching	None	None	None	None	123	488370	140290	299990	0	48093	0	0	0	0
O14579	O14579	Coatomer subunit epsilon	COPE	sp|O14579|COPE_HUMAN Coatomer subunit epsilon OS=Homo sapiens OX=9606 GN=COPE PE=1 SV=3	By MS/MS	By MS/MS	By MS/MS	By MS/MS	By MS/MS	By MS/MS	By MS/MS	By MS/MS	13	139890000	14194000	12800000	11099000	12344000	15802000	12681000	28753000	32213000
O14617	O14617	AP-3 complex subunit delta-1	AP3D1	sp|O14617|AP3D1_HUMAN AP-3 complex subunit delta-1 OS=Homo sapiens OX=9606 GN=AP3D1 PE=1 SV=1	By MS/MS	By matching	By MS/MS	By MS/MS	By MS/MS	By matching	By MS/MS	By matching	51	7851300	869700	439360	486120	1561400	2190200	321270	599950	1383200
O14647	O14647	Chromodomain-helicase-DNA-binding protein 2	CHD2	sp|O14647|CHD2_HUMAN Chromodomain-helicase-DNA-binding protein 2 OS=Homo sapiens OX=9606 GN=CHD2 PE=1 SV=2	By matching	None	None	By MS/MS	By MS/MS	None	By matching	By matching	80	1490900	39491	0	0	465500	551220	0	88491	346190
O14672	O14672	Disintegrin and metalloproteinase domain-containing protein 10	ADAM10	sp|O14672|ADA10_HUMAN Disintegrin and metalloproteinase domain-containing protein 10 OS=Homo sapiens OX=9606 GN=ADAM10 PE=1 SV=1	By matching	None	By matching	By MS/MS	By MS/MS	By matching	None	By MS/MS	40	11362000	1060700	0	569040	3563200	4241300	316150	0	1611200
O14744	O14744	Protein arginine N-methyltransferase 5;Protein arginine N-methyltransferase 5, N-terminally processed	PRMT5	sp|O14744|ANM5_HUMAN Protein arginine N-methyltransferase 5 OS=Homo sapiens OX=9606 GN=PRMT5 PE=1 SV=4	By MS/MS	By MS/MS	By matching	By MS/MS	By MS/MS	By MS/MS	By MS/MS	By MS/MS	32	17836000	843230	1165000	1446400	3356000	3177000	2023100	3311500	2513400
O14745	O14745	Na(+)/H(+) exchange regulatory cofactor NHE-RF1	NHERF1	sp|O14745|NHRF1_HUMAN Na(+)/H(+) exchange regulatory cofactor NHE-RF1 OS=Homo sapiens OX=9606 GN=NHERF1 PE=1 SV=4	By MS/MS	By MS/MS	By MS/MS	By MS/MS	By MS/MS	By MS/MS	By MS/MS	By MS/MS	22	88360000	7640800	7993100	8720200	7911600	8299200	10529000	18283000	18982000
O14746	O14746	Telomerase reverse transcriptase	TERT	sp|O14746|TERT_HUMAN Telomerase reverse transcriptase OS=Homo sapiens OX=9606 GN=TERT PE=1 SV=1	By matching	By MS/MS	By matching	By MS/MS	By MS/MS	By MS/MS	By matching	By MS/MS	57	3969100	89707	134680	108980	1237500	1246000	145290	272630	734330
O14763	O14763	Tumor necrosis factor receptor superfamily member 10B	TNFRSF10B	sp|O14763|TR10B_HUMAN Tumor necrosis factor receptor superfamily member 10B OS=Homo sapiens OX=9606 GN=TNFRSF10B PE=1 SV=2	None	None	None	By MS/MS	By MS/MS	None	None	By matching	18	1917700	0	0	0	1292400	0	0	0	625230
O14773	O14773	Tripeptidyl-peptidase 1	TPP1	sp|O14773|TPP1_HUMAN Tripeptidyl-peptidase 1 OS=Homo sapiens OX=9606 GN=TPP1 PE=1 SV=2	By matching	By MS/MS	By MS/MS	By matching	By MS/MS	By matching	By matching	By MS/MS	22	19885000	1387400	996200	4671000	4172200	4809700	788490	1537600	1522100
O14776	O14776	Transcription elongation regulator 1	TCERG1	sp|O14776|TCRG1_HUMAN Transcription elongation regulator 1 OS=Homo sapiens OX=9606 GN=TCERG1 PE=1 SV=2	By MS/MS	By MS/MS	By MS/MS	By MS/MS	By MS/MS	By MS/MS	By MS/MS	By MS/MS	39	64236000	3383300	2758800	1706100	15460000	18656000	4699800	6433100	11139000
O14777	O14777	Kinetochore protein NDC80 homolog	NDC80	sp|O14777|NDC80_HUMAN Kinetochore protein NDC80 homolog OS=Homo sapiens OX=9606 GN=NDC80 PE=1 SV=1	By MS/MS	By matching	By MS/MS	By MS/MS	By MS/MS	By matching	By MS/MS	By MS/MS	45	17442000	1982800	868400	951880	2428000	2671800	1479500	3544800	3515200
O14786	O14786	Neuropilin-1	NRP1	sp|O14786|NRP1_HUMAN Neuropilin-1 OS=Homo sapiens OX=9606 GN=NRP1 PE=1 SV=3	By MS/MS	By matching	By MS/MS	By matching	By MS/MS	By MS/MS	By matching	By MS/MS	41	4889300	500210	436250	467950	913100	1103800	492120	457810	975870
O14818;Q8TAA3	O14818	Proteasome subunit alpha type-7	PSMA7	sp|O14818|PSA7_HUMAN Proteasome subunit alpha type-7 OS=Homo sapiens OX=9606 GN=PSMA7 PE=1 SV=1	By MS/MS	By MS/MS	By MS/MS	By MS/MS	By MS/MS	By MS/MS	By MS/MS	By MS/MS	14	309740000	24562000	27820000	27571000	41167000	41881000	36075000	58696000	51967000
O14828	O14828	Secretory carrier-associated membrane protein 3	SCAMP3	sp|O14828|SCAM3_HUMAN Secretory carrier-associated membrane protein 3 OS=Homo sapiens OX=9606 GN=SCAMP3 PE=1 SV=3	By MS/MS	By MS/MS	By MS/MS	By MS/MS	By MS/MS	By MS/MS	By MS/MS	By MS/MS	10	132420000	11617000	4807900	4005800	46258000	25910000	3844300	21742000	14234000
O14880	O14880	Glutathione S-transferase 3, mitochondrial	MGST3	sp|O14880|MGST3_HUMAN Glutathione S-transferase 3, mitochondrial OS=Homo sapiens OX=9606 GN=MGST3 PE=1 SV=1	By MS/MS	None	By matching	By MS/MS	By MS/MS	By matching	By matching	By MS/MS	7	71288000	6063600	0	1489500	30339000	21030000	1431400	2114300	8819900
O14908	O14908	PDZ domain-containing protein GIPC1	GIPC1	sp|O14908|GIPC1_HUMAN PDZ domain-containing protein GIPC1 OS=Homo sapiens OX=9606 GN=GIPC1 PE=1 SV=2	None	By matching	By matching	None	None	By MS/MS	By matching	By matching	15	5683600	0	848850	539620	0	0	1008300	1558700	1728100
O14925;Q5SRD1	O14925	Mitochondrial import inner membrane translocase subunit Tim23	TIMM23	sp|O14925|TIM23_HUMAN Mitochondrial import inner membrane translocase subunit Tim23 OS=Homo sapiens OX=9606 GN=TIMM23 PE=1 SV=1	By matching	None	None	By MS/MS	By MS/MS	None	By matching	By matching	9	33923000	2461500	0	0	14858000	10418000	0	1975100	4210000
O14929	O14929	Histone acetyltransferase type B catalytic subunit	HAT1	sp|O14929|HAT1_HUMAN Histone acetyltransferase type B catalytic subunit OS=Homo sapiens OX=9606 GN=HAT1 PE=1 SV=2	By MS/MS	By matching	By MS/MS	By MS/MS	By MS/MS	By MS/MS	By MS/MS	By MS/MS	15	49011000	3769300	3729200	3835200	7588400	7773600	5758400	6834900	9721800
O14949	O14949	Cytochrome b-c1 complex subunit 8	UQCRQ	sp|O14949|QCR8_HUMAN Cytochrome b-c1 complex subunit 8 OS=Homo sapiens OX=9606 GN=UQCRQ PE=1 SV=4	By matching	None	None	By MS/MS	By MS/MS	None	None	By MS/MS	6	18191000	3420300	0	0	13046000	5145800	0	0	5579300
P19105;O14950;P24844	P19105;O14950	Myosin regulatory light chain 12A;Myosin regulatory light chain 12B	MYL12A;MYL12B	sp|P19105|ML12A_HUMAN Myosin regulatory light chain 12A OS=Homo sapiens OX=9606 GN=MYL12A PE=1 SV=2;sp|O14950|ML12B_HUMAN Myosin regulatory light chain 12B OS=Homo sapiens OX=9606 GN=MYL12B PE=1 SV=2	By MS/MS	By MS/MS	By MS/MS	By MS/MS	By MS/MS	By MS/MS	By MS/MS	By MS/MS	9	859790000	61960000	55241000	53352000	153260000	130260000	74042000	154740000	176930000
O14964	O14964	Hepatocyte growth factor-regulated tyrosine kinase substrate	HGS	sp|O14964|HGS_HUMAN Hepatocyte growth factor-regulated tyrosine kinase substrate OS=Homo sapiens OX=9606 GN=HGS PE=1 SV=1	By MS/MS	By MS/MS	By MS/MS	By MS/MS	By MS/MS	By MS/MS	By MS/MS	By MS/MS	25	11957000	1560900	460350	351490	1879900	2079700	406230	2498600	2719600
O14974	O14974	Protein phosphatase 1 regulatory subunit 12A	PPP1R12A	sp|O14974|MYPT1_HUMAN Protein phosphatase 1 regulatory subunit 12A OS=Homo sapiens OX=9606 GN=PPP1R12A PE=1 SV=1	By MS/MS	By MS/MS	By MS/MS	By MS/MS	By MS/MS	By MS/MS	By MS/MS	By matching	46	16006000	948000	1254000	913310	3086200	3255600	1075700	2640100	2833100
O14979	O14979	Heterogeneous nuclear ribonucleoprotein D-like	HNRNPDL	sp|O14979|HNRDL_HUMAN Heterogeneous nuclear ribonucleoprotein D-like OS=Homo sapiens OX=9606 GN=HNRNPDL PE=1 SV=3	By MS/MS	By MS/MS	By MS/MS	By MS/MS	By MS/MS	By MS/MS	By MS/MS	By MS/MS	21	471380000	34379000	31165000	33238000	77734000	80348000	49468000	83266000	81781000
O14980	O14980	Exportin-1	XPO1	sp|O14980|XPO1_HUMAN Exportin-1 OS=Homo sapiens OX=9606 GN=XPO1 PE=1 SV=1	By MS/MS	By MS/MS	By MS/MS	By MS/MS	By MS/MS	By MS/MS	By MS/MS	By MS/MS	53	98413000	6547900	6628800	5667000	15209000	22613000	6385500	13567000	21796000
O15020	O15020	Spectrin beta chain, non-erythrocytic 2	SPTBN2	sp|O15020|SPTN2_HUMAN Spectrin beta chain, non-erythrocytic 2 OS=Homo sapiens OX=9606 GN=SPTBN2 PE=1 SV=3	By MS/MS	By MS/MS	By MS/MS	By MS/MS	By MS/MS	By MS/MS	By MS/MS	By MS/MS	128	14239000	598940	2534100	3444900	705750	1756400	1471100	1583200	2145000
O15027	O15027	Protein transport protein Sec16A	SEC16A	sp|O15027|SC16A_HUMAN Protein transport protein Sec16A OS=Homo sapiens OX=9606 GN=SEC16A PE=1 SV=4	By matching	By matching	By matching	By matching	By MS/MS	By MS/MS	By MS/MS	By matching	79	1610500	127100	134140	136740	187960	360870	155060	240300	268330
O15031	O15031	Plexin-B2	PLXNB2	sp|O15031|PLXB2_HUMAN Plexin-B2 OS=Homo sapiens OX=9606 GN=PLXNB2 PE=1 SV=3	By MS/MS	By MS/MS	By MS/MS	By MS/MS	By MS/MS	By MS/MS	By MS/MS	By MS/MS	86	7446200	576930	508980	455370	1083900	1308000	723340	1282400	1507200
O15042	O15042	U2 snRNP-associated SURP motif-containing protein	U2SURP	sp|O15042|SR140_HUMAN U2 snRNP-associated SURP motif-containing protein OS=Homo sapiens OX=9606 GN=U2SURP PE=1 SV=2	By MS/MS	By MS/MS	By matching	By MS/MS	By MS/MS	By matching	By MS/MS	By MS/MS	38	31799000	1044800	434970	344320	12330000	10898000	456910	1767400	4522900
O15078	O15078	Centrosomal protein of 290 kDa	CEP290	sp|O15078|CE290_HUMAN Centrosomal protein of 290 kDa OS=Homo sapiens OX=9606 GN=CEP290 PE=1 SV=2	By MS/MS	By MS/MS	By MS/MS	By MS/MS	By MS/MS	By MS/MS	By MS/MS	By MS/MS	144	8207700	638370	921940	981650	1180100	1153100	1033600	1219900	1079000
O15091	O15091	Mitochondrial ribonuclease P catalytic subunit	PRORP	sp|O15091|MRPP3_HUMAN Mitochondrial ribonuclease P catalytic subunit OS=Homo sapiens OX=9606 GN=PRORP PE=1 SV=2	By matching	None	None	By matching	By MS/MS	None	None	None	33	2063000	239000	0	0	785110	1038900	0	0	0
O15116	O15116	U6 snRNA-associated Sm-like protein LSm1	LSM1	sp|O15116|LSM1_HUMAN U6 snRNA-associated Sm-like protein LSm1 OS=Homo sapiens OX=9606 GN=LSM1 PE=1 SV=1	By MS/MS	By MS/MS	By MS/MS	By MS/MS	By MS/MS	By MS/MS	By MS/MS	By MS/MS	6	13514000	1422000	1153900	1307600	1526100	1143900	1482300	2602800	2875200
O15118	O15118	NPC intracellular cholesterol transporter 1	NPC1	sp|O15118|NPC1_HUMAN NPC intracellular cholesterol transporter 1 OS=Homo sapiens OX=9606 GN=NPC1 PE=1 SV=2	None	None	None	None	By MS/MS	None	None	None	43	869860	0	0	0	0	869860	0	0	0
O15121	O15121	Sphingolipid delta(4)-desaturase DES1	DEGS1	sp|O15121|DEGS1_HUMAN Sphingolipid delta(4)-desaturase DES1 OS=Homo sapiens OX=9606 GN=DEGS1 PE=1 SV=1	By MS/MS	None	By matching	By MS/MS	By MS/MS	None	None	By MS/MS	7	24083000	2757600	0	1860200	8891200	6278200	0	0	4296100
O15126	O15126	Secretory carrier-associated membrane protein 1	SCAMP1	sp|O15126|SCAM1_HUMAN Secretory carrier-associated membrane protein 1 OS=Homo sapiens OX=9606 GN=SCAMP1 PE=1 SV=2	By MS/MS	None	By matching	By MS/MS	By MS/MS	None	By matching	By matching	12	23045000	0	0	1987000	5341200	6606500	0	4153300	4956800
O15127	O15127	Secretory carrier-associated membrane protein 2	SCAMP2	sp|O15127|SCAM2_HUMAN Secretory carrier-associated membrane protein 2 OS=Homo sapiens OX=9606 GN=SCAMP2 PE=1 SV=2	By MS/MS	None	By matching	By matching	By MS/MS	None	By matching	By matching	6	38081000	1690500	0	7274300	5747800	13709000	0	2267300	7391800
O15143	O15143	Actin-related protein 2/3 complex subunit 1B	ARPC1B	sp|O15143|ARC1B_HUMAN Actin-related protein 2/3 complex subunit 1B OS=Homo sapiens OX=9606 GN=ARPC1B PE=1 SV=3	By MS/MS	By MS/MS	By MS/MS	By MS/MS	By MS/MS	By MS/MS	By MS/MS	By MS/MS	18	41211000	3625600	3695300	1654600	8543300	8727600	3383600	4357200	7223500
O15144	O15144	Actin-related protein 2/3 complex subunit 2	ARPC2	sp|O15144|ARPC2_HUMAN Actin-related protein 2/3 complex subunit 2 OS=Homo sapiens OX=9606 GN=ARPC2 PE=1 SV=1	By MS/MS	By MS/MS	By MS/MS	By MS/MS	By MS/MS	By MS/MS	By MS/MS	By MS/MS	19	80175000	7468200	5510200	5841200	13441000	16851000	7050300	12265000	11748000
O15145	O15145	Actin-related protein 2/3 complex subunit 3	ARPC3	sp|O15145|ARPC3_HUMAN Actin-related protein 2/3 complex subunit 3 OS=Homo sapiens OX=9606 GN=ARPC3 PE=1 SV=3	By MS/MS	By MS/MS	By MS/MS	By MS/MS	By MS/MS	By MS/MS	By MS/MS	By MS/MS	10	205850000	20487000	18590000	17693000	21896000	34479000	19116000	32905000	40682000
O15155	O15155	BET1 homolog	BET1	sp|O15155|BET1_HUMAN BET1 homolog OS=Homo sapiens OX=9606 GN=BET1 PE=1 SV=1	By matching	None	None	By MS/MS	By matching	None	By matching	By matching	3	16277000	1336200	0	0	5209200	5713800	0	1165300	2852300
O15160	O15160	DNA-directed RNA polymerases I and III subunit RPAC1	POLR1C	sp|O15160|RPAC1_HUMAN DNA-directed RNA polymerases I and III subunit RPAC1 OS=Homo sapiens OX=9606 GN=POLR1C PE=1 SV=1	By MS/MS	By MS/MS	By MS/MS	By MS/MS	By MS/MS	By MS/MS	By MS/MS	By MS/MS	14	138650000	5363800	15270000	15632000	9141700	19104000	15474000	26217000	32442000
O15173	O15173	Membrane-associated progesterone receptor component 2	PGRMC2	sp|O15173|PGRC2_HUMAN Membrane-associated progesterone receptor component 2 OS=Homo sapiens OX=9606 GN=PGRMC2 PE=1 SV=1	By MS/MS	By matching	By matching	By MS/MS	By MS/MS	By MS/MS	By MS/MS	By MS/MS	9	215840000	9932800	254590	7762000	73120000	75373000	2811400	5679200	41158000
O15213	O15213	WD repeat-containing protein 46	WDR46	sp|O15213|WDR46_HUMAN WD repeat-containing protein 46 OS=Homo sapiens OX=9606 GN=WDR46 PE=1 SV=3	By matching	By matching	By matching	By MS/MS	By MS/MS	By matching	By matching	By MS/MS	29	29138000	1327700	425140	703850	11048000	9938000	2405300	922370	2367500
O15226	O15226	NF-kappa-B-repressing factor	NKRF	sp|O15226|NKRF_HUMAN NF-kappa-B-repressing factor OS=Homo sapiens OX=9606 GN=NKRF PE=1 SV=2	By MS/MS	By matching	By matching	By MS/MS	By MS/MS	By matching	By matching	By MS/MS	38	18807000	474620	1614400	836290	4910500	4502000	1116600	1929500	3422700
O15231	O15231	Zinc finger protein 185	ZNF185	sp|O15231|ZN185_HUMAN Zinc finger protein 185 OS=Homo sapiens OX=9606 GN=ZNF185 PE=1 SV=3	By MS/MS	By MS/MS	By MS/MS	By MS/MS	By MS/MS	By MS/MS	By MS/MS	By MS/MS	38	86623000	5900000	4739200	5098400	15941000	19302000	7316700	14066000	14259000
O15258	O15258	Protein RER1	RER1	sp|O15258|RER1_HUMAN Protein RER1 OS=Homo sapiens OX=9606 GN=RER1 PE=1 SV=1	By matching	None	None	By MS/MS	By matching	None	None	By matching	9	16676000	1417300	0	0	6626500	6065000	0	0	2566700
O15260	O15260	Surfeit locus protein 4	SURF4	sp|O15260|SURF4_HUMAN Surfeit locus protein 4 OS=Homo sapiens OX=9606 GN=SURF4 PE=1 SV=3	By MS/MS	By matching	By matching	By MS/MS	By MS/MS	By matching	By matching	By MS/MS	9	81832000	7965900	932050	1485100	38654000	12309000	1637900	3604900	18366000
O15269	O15269	Serine palmitoyltransferase 1	SPTLC1	sp|O15269|SPTC1_HUMAN Serine palmitoyltransferase 1 OS=Homo sapiens OX=9606 GN=SPTLC1 PE=1 SV=1	By MS/MS	By matching	By matching	By MS/MS	By MS/MS	By MS/MS	By matching	By MS/MS	21	13702000	2275500	354170	539920	1645000	4766900	565260	696620	2858200
O15294	O15294	UDP-N-acetylglucosamine--peptide N-acetylglucosaminyltransferase 110 kDa subunit	OGT	sp|O15294|OGT1_HUMAN UDP-N-acetylglucosamine--peptide N-acetylglucosaminyltransferase 110 kDa subunit OS=Homo sapiens OX=9606 GN=OGT PE=1 SV=3	By MS/MS	By MS/MS	By MS/MS	By MS/MS	By MS/MS	By MS/MS	By MS/MS	By MS/MS	48	16856000	1285300	1440700	1276900	2054600	2744600	1386300	3334500	3333200
O15321	O15321	Transmembrane 9 superfamily member 1	TM9SF1	sp|O15321|TM9S1_HUMAN Transmembrane 9 superfamily member 1 OS=Homo sapiens OX=9606 GN=TM9SF1 PE=1 SV=2	By matching	By matching	None	By MS/MS	By MS/MS	By MS/MS	None	None	22	6948200	783130	482390	0	2633900	2460500	588230	0	0
O15355	O15355	Protein phosphatase 1G	PPM1G	sp|O15355|PPM1G_HUMAN Protein phosphatase 1G OS=Homo sapiens OX=9606 GN=PPM1G PE=1 SV=1	By MS/MS	By MS/MS	By MS/MS	By MS/MS	By MS/MS	By MS/MS	By MS/MS	By MS/MS	23	53319000	5522000	3148800	5884700	6753500	8675300	4725400	10352000	8258100
O15360	O15360	Fanconi anemia group A protein	FANCA	sp|O15360|FANCA_HUMAN Fanconi anemia group A protein OS=Homo sapiens OX=9606 GN=FANCA PE=1 SV=2	None	None	None	By MS/MS	By MS/MS	None	None	None	66	110430	0	0	0	53379	57048	0	0	0
O15371	O15371	Eukaryotic translation initiation factor 3 subunit D	EIF3D	sp|O15371|EIF3D_HUMAN Eukaryotic translation initiation factor 3 subunit D OS=Homo sapiens OX=9606 GN=EIF3D PE=1 SV=1	By MS/MS	By MS/MS	By MS/MS	By MS/MS	By MS/MS	By MS/MS	By MS/MS	By MS/MS	24	232140000	15931000	15872000	15217000	48947000	50364000	17530000	27246000	41032000
O15372	O15372	Eukaryotic translation initiation factor 3 subunit H	EIF3H	sp|O15372|EIF3H_HUMAN Eukaryotic translation initiation factor 3 subunit H OS=Homo sapiens OX=9606 GN=EIF3H PE=1 SV=1	By MS/MS	By MS/MS	By MS/MS	By MS/MS	By MS/MS	By MS/MS	By MS/MS	By MS/MS	20	209610000	19207000	20242000	19942000	23065000	24193000	27186000	34940000	40831000
P25490;O15391;Q96MM3	P25490;O15391;Q96MM3	Transcriptional repressor protein YY1;Transcription factor YY2;Zinc finger protein 42 homolog	YY1;YY2;ZFP42	sp|P25490|TYY1_HUMAN Transcriptional repressor protein YY1 OS=Homo sapiens OX=9606 GN=YY1 PE=1 SV=2;sp|O15391|TYY2_HUMAN Transcription factor YY2 OS=Homo sapiens OX=9606 GN=YY2 PE=1 SV=1;sp|Q96MM3|ZFP42_HUMAN Zinc finger protein 42 homolog OS=Homo sapiens	By MS/MS	By MS/MS	By MS/MS	By matching	By MS/MS	By MS/MS	By MS/MS	By matching	16	25166000	1993300	1884800	2606000	4027600	2100500	3163800	4128200	5261800
O15392	O15392	Baculoviral IAP repeat-containing protein 5	BIRC5	sp|O15392|BIRC5_HUMAN Baculoviral IAP repeat-containing protein 5 OS=Homo sapiens OX=9606 GN=BIRC5 PE=1 SV=3	By MS/MS	By matching	By matching	By matching	None	By MS/MS	By MS/MS	By MS/MS	8	13248000	1115200	1178900	1685100	2003000	0	2377700	3095900	2907200
O15400	O15400	Syntaxin-7	STX7	sp|O15400|STX7_HUMAN Syntaxin-7 OS=Homo sapiens OX=9606 GN=STX7 PE=1 SV=4	By MS/MS	None	By matching	By MS/MS	By MS/MS	By MS/MS	By MS/MS	By MS/MS	11	61948000	4443300	0	1718800	19739000	19800000	1734000	5601800	8911200
O15439	O15439	ATP-binding cassette sub-family C member 4	ABCC4	sp|O15439|MRP4_HUMAN ATP-binding cassette sub-family C member 4 OS=Homo sapiens OX=9606 GN=ABCC4 PE=1 SV=3	None	None	None	By MS/MS	By matching	None	None	None	69	373710	0	0	0	152010	221700	0	0	0
O15446	O15446	DNA-directed RNA polymerase I subunit RPA34	POLR1G	sp|O15446|RPA34_HUMAN DNA-directed RNA polymerase I subunit RPA34 OS=Homo sapiens OX=9606 GN=POLR1G PE=1 SV=1	By MS/MS	By MS/MS	By MS/MS	By MS/MS	By MS/MS	By MS/MS	By MS/MS	By MS/MS	15	42754000	2939100	2275300	2828600	12205000	13368000	3152200	2101800	3883700
O15479;O15481;Q96LZ2;P43366;Q9UBF1	O15479	Melanoma-associated antigen B2	MAGEB2	sp|O15479|MAGB2_HUMAN Melanoma-associated antigen B2 OS=Homo sapiens OX=9606 GN=MAGEB2 PE=1 SV=3	By MS/MS	By MS/MS	By MS/MS	By MS/MS	By MS/MS	By MS/MS	By MS/MS	By MS/MS	13	249090000	21210000	17648000	11674000	51439000	57191000	21609000	28069000	40248000
O15511	O15511	Actin-related protein 2/3 complex subunit 5	ARPC5	sp|O15511|ARPC5_HUMAN Actin-related protein 2/3 complex subunit 5 OS=Homo sapiens OX=9606 GN=ARPC5 PE=1 SV=3	By MS/MS	By MS/MS	By MS/MS	By MS/MS	By MS/MS	By MS/MS	By MS/MS	By MS/MS	10	79127000	4322500	4209900	5222200	17255000	12155000	7268400	11852000	16842000
O15514	O15514	DNA-directed RNA polymerase II subunit RPB4	POLR2D	sp|O15514|RPB4_HUMAN DNA-directed RNA polymerase II subunit RPB4 OS=Homo sapiens OX=9606 GN=POLR2D PE=1 SV=1	By MS/MS	By MS/MS	None	By MS/MS	By matching	By matching	By MS/MS	By MS/MS	9	13571000	1403200	1193500	0	2910200	2696300	6255200	3497300	4566700
O15533	O15533	Tapasin	TAPBP	sp|O15533|TPSN_HUMAN Tapasin OS=Homo sapiens OX=9606 GN=TAPBP PE=1 SV=2	By matching	By matching	By matching	By MS/MS	By MS/MS	By matching	By matching	By MS/MS	9	15387000	2162900	860230	1460100	6737200	9972700	3492800	6156200	4166400
O15554	O15554	Intermediate conductance calcium-activated potassium channel protein 4	KCNN4	sp|O15554|KCNN4_HUMAN Intermediate conductance calcium-activated potassium channel protein 4 OS=Homo sapiens OX=9606 GN=KCNN4 PE=1 SV=1	By MS/MS	None	None	By MS/MS	By MS/MS	None	None	None	17	7445000	1577700	0	0	2815600	3051600	0	0	0
O43143	O43143	ATP-dependent RNA helicase DHX15	DHX15	sp|O43143|DHX15_HUMAN ATP-dependent RNA helicase DHX15 OS=Homo sapiens OX=9606 GN=DHX15 PE=1 SV=2	By MS/MS	By MS/MS	By MS/MS	By MS/MS	By MS/MS	By MS/MS	By MS/MS	By MS/MS	38	328480000	20794000	17927000	16778000	70588000	98045000	18017000	33874000	52459000
O43148	O43148	mRNA cap guanine-N7 methyltransferase	RNMT	sp|O43148|MCES_HUMAN mRNA cap guanine-N7 methyltransferase OS=Homo sapiens OX=9606 GN=RNMT PE=1 SV=1	By MS/MS	By MS/MS	By MS/MS	By MS/MS	By MS/MS	By MS/MS	By MS/MS	By MS/MS	25	94134000	8028600	6678400	10466000	13684000	14224000	11445000	10454000	19154000
O43159	O43159	Ribosomal RNA-processing protein 8	RRP8	sp|O43159|RRP8_HUMAN Ribosomal RNA-processing protein 8 OS=Homo sapiens OX=9606 GN=RRP8 PE=1 SV=2	By matching	By MS/MS	By MS/MS	By MS/MS	By MS/MS	By matching	By MS/MS	By MS/MS	23	19903000	1136400	708900	700070	5882600	5110700	1498200	2158000	2708400
O43166	O43166	Signal-induced proliferation-associated 1-like protein 1	SIPA1L1	sp|O43166|SI1L1_HUMAN Signal-induced proliferation-associated 1-like protein 1 OS=Homo sapiens OX=9606 GN=SIPA1L1 PE=1 SV=4	By matching	By matching	By matching	By MS/MS	By MS/MS	By matching	By MS/MS	By MS/MS	93	3527900	253670	64385	202440	965520	1087000	254500	87755	612630
O43169	O43169	Cytochrome b5 type B	CYB5B	sp|O43169|CYB5B_HUMAN Cytochrome b5 type B OS=Homo sapiens OX=9606 GN=CYB5B PE=1 SV=3	By MS/MS	None	By matching	By MS/MS	By MS/MS	By matching	By MS/MS	By MS/MS	6	130130000	6059400	0	1840900	51347000	45464000	1749800	4869900	22394000
O43172	O43172	U4/U6 small nuclear ribonucleoprotein Prp4	PRPF4	sp|O43172|PRP4_HUMAN U4/U6 small nuclear ribonucleoprotein Prp4 OS=Homo sapiens OX=9606 GN=PRPF4 PE=1 SV=2	By MS/MS	By MS/MS	By MS/MS	By MS/MS	By MS/MS	By MS/MS	By MS/MS	By MS/MS	29	116370000	10245000	10021000	12319000	13879000	13013000	11680000	18341000	26868000
O43175	O43175	D-3-phosphoglycerate dehydrogenase	PHGDH	sp|O43175|SERA_HUMAN D-3-phosphoglycerate dehydrogenase OS=Homo sapiens OX=9606 GN=PHGDH PE=1 SV=4	By MS/MS	By MS/MS	By MS/MS	By MS/MS	By MS/MS	By MS/MS	By MS/MS	By MS/MS	22	263660000	24405000	22702000	24606000	40883000	40217000	25144000	38464000	47242000
O43237	O43237	Cytoplasmic dynein 1 light intermediate chain 2	DYNC1LI2	sp|O43237|DC1L2_HUMAN Cytoplasmic dynein 1 light intermediate chain 2 OS=Homo sapiens OX=9606 GN=DYNC1LI2 PE=1 SV=1	By matching	By matching	By matching	By matching	By MS/MS	By matching	By matching	By MS/MS	24	10435000	1092000	0	662120	1706000	2431300	1016600	1235900	2290900
O43242	O43242	26S proteasome non-ATPase regulatory subunit 3	PSMD3	sp|O43242|PSMD3_HUMAN 26S proteasome non-ATPase regulatory subunit 3 OS=Homo sapiens OX=9606 GN=PSMD3 PE=1 SV=2	By MS/MS	By MS/MS	By MS/MS	By MS/MS	By MS/MS	By MS/MS	By MS/MS	By MS/MS	34	69065000	5622400	6052800	6658600	11001000	12465000	7995300	7557100	11712000
O43251;Q9NWB1;A6NFN3	O43251;Q9NWB1;A6NFN3	RNA binding protein fox-1 homolog 2;RNA binding protein fox-1 homolog 1;RNA binding protein fox-1 homolog 3	RBFOX2;RBFOX1;RBFOX3	sp|O43251|RFOX2_HUMAN RNA binding protein fox-1 homolog 2 OS=Homo sapiens OX=9606 GN=RBFOX2 PE=1 SV=3;sp|Q9NWB1|RFOX1_HUMAN RNA binding protein fox-1 homolog 1 OS=Homo sapiens OX=9606 GN=RBFOX1 PE=1 SV=2;sp|A6NFN3|RFOX3_HUMAN RNA binding protein fox-1 homo	By MS/MS	By MS/MS	By MS/MS	By MS/MS	By MS/MS	By MS/MS	By MS/MS	By MS/MS	11	60902000	4728700	4010600	3934100	8056200	7926100	4976500	14428000	12842000
O43264	O43264	Centromere/kinetochore protein zw10 homolog	ZW10	sp|O43264|ZW10_HUMAN Centromere/kinetochore protein zw10 homolog OS=Homo sapiens OX=9606 GN=ZW10 PE=1 SV=3	By MS/MS	By MS/MS	By MS/MS	By MS/MS	By MS/MS	By MS/MS	By MS/MS	By MS/MS	41	21851000	1508200	1025400	794920	4928500	5355300	1781200	3049900	3407800
O43290	O43290	U4/U6.U5 tri-snRNP-associated protein 1	SART1	sp|O43290|SNUT1_HUMAN U4/U6.U5 tri-snRNP-associated protein 1 OS=Homo sapiens OX=9606 GN=SART1 PE=1 SV=1	By MS/MS	By MS/MS	By MS/MS	By MS/MS	By MS/MS	By MS/MS	By MS/MS	By MS/MS	39	77434000	4348000	4514000	2817200	20958000	18732000	4753500	8081900	13230000
O43293	O43293	Death-associated protein kinase 3	DAPK3	sp|O43293|DAPK3_HUMAN Death-associated protein kinase 3 OS=Homo sapiens OX=9606 GN=DAPK3 PE=1 SV=1	By MS/MS	By MS/MS	By MS/MS	By matching	By MS/MS	By MS/MS	By MS/MS	By MS/MS	19	1360600	798280	1704500	167120	248610	504540	1629200	194490	245870
O43324	O43324	Eukaryotic translation elongation factor 1 epsilon-1	EEF1E1	sp|O43324|MCA3_HUMAN Eukaryotic translation elongation factor 1 epsilon-1 OS=Homo sapiens OX=9606 GN=EEF1E1 PE=1 SV=1	By MS/MS	By MS/MS	By MS/MS	By MS/MS	By MS/MS	By MS/MS	By MS/MS	By MS/MS	12	130850000	11024000	9072900	8618000	27008000	27694000	9676600	15701000	22059000
O43390	O43390	Heterogeneous nuclear ribonucleoprotein R	HNRNPR	sp|O43390|HNRPR_HUMAN Heterogeneous nuclear ribonucleoprotein R OS=Homo sapiens OX=9606 GN=HNRNPR PE=1 SV=1	By MS/MS	By MS/MS	By MS/MS	By MS/MS	By MS/MS	By MS/MS	By MS/MS	By MS/MS	34	665440000	42586000	33201000	38621000	157180000	168790000	51317000	78240000	95505000
O43395	O43395	U4/U6 small nuclear ribonucleoprotein Prp3	PRPF3	sp|O43395|PRPF3_HUMAN U4/U6 small nuclear ribonucleoprotein Prp3 OS=Homo sapiens OX=9606 GN=PRPF3 PE=1 SV=2	By MS/MS	By matching	None	By MS/MS	By MS/MS	By matching	By MS/MS	By MS/MS	32	25098000	418730	515890	0	8733000	10200000	834990	1362900	3548500
O43396	O43396	Thioredoxin-like protein 1	TXNL1	sp|O43396|TXNL1_HUMAN Thioredoxin-like protein 1 OS=Homo sapiens OX=9606 GN=TXNL1 PE=1 SV=3	By MS/MS	By MS/MS	By MS/MS	By matching	By MS/MS	By MS/MS	By MS/MS	By MS/MS	15	22627000	2077300	2284600	1963400	2033600	1410300	4053000	4455000	4349700
O43402	O43402	ER membrane protein complex subunit 8	EMC8	sp|O43402|EMC8_HUMAN ER membrane protein complex subunit 8 OS=Homo sapiens OX=9606 GN=EMC8 PE=1 SV=1	By matching	By matching	By MS/MS	By MS/MS	By MS/MS	By MS/MS	By MS/MS	By MS/MS	11	69246000	8245900	5122300	6013100	7254500	7290300	6959700	14259000	14102000
O43447	O43447	Peptidyl-prolyl cis-trans isomerase H	PPIH	sp|O43447|PPIH_HUMAN Peptidyl-prolyl cis-trans isomerase H OS=Homo sapiens OX=9606 GN=PPIH PE=1 SV=1	By MS/MS	By MS/MS	By MS/MS	By MS/MS	By MS/MS	By MS/MS	By MS/MS	By MS/MS	11	62222000	7429600	6983000	6058300	4118000	1922300	6879500	13559000	15272000
O43464	O43464	Serine protease HTRA2, mitochondrial	HTRA2	sp|O43464|HTRA2_HUMAN Serine protease HTRA2, mitochondrial OS=Homo sapiens OX=9606 GN=HTRA2 PE=1 SV=2	By MS/MS	By matching	By matching	By matching	By MS/MS	By MS/MS	By MS/MS	By MS/MS	22	16674000	1854500	1353900	337520	641750	3214200	2527000	3746700	2998500
O43491	O43491	Band 4.1-like protein 2	EPB41L2	sp|O43491|E41L2_HUMAN Band 4.1-like protein 2 OS=Homo sapiens OX=9606 GN=EPB41L2 PE=1 SV=1	By MS/MS	By MS/MS	By MS/MS	By MS/MS	By MS/MS	By MS/MS	By MS/MS	By MS/MS	56	67464000	4229200	5102100	5141000	13030000	14178000	5803500	9001500	10979000
O43615	O43615	Mitochondrial import inner membrane translocase subunit TIM44	TIMM44	sp|O43615|TIM44_HUMAN Mitochondrial import inner membrane translocase subunit TIM44 OS=Homo sapiens OX=9606 GN=TIMM44 PE=1 SV=2	By MS/MS	By MS/MS	By MS/MS	By MS/MS	By MS/MS	By MS/MS	By MS/MS	By MS/MS	29	57102000	3771700	2114600	2082900	11984000	21121000	3410600	3594300	9023500
O43617	O43617	Trafficking protein particle complex subunit 3	TRAPPC3	sp|O43617|TPPC3_HUMAN Trafficking protein particle complex subunit 3 OS=Homo sapiens OX=9606 GN=TRAPPC3 PE=1 SV=1	By MS/MS	By matching	By matching	By MS/MS	By matching	By matching	By MS/MS	By MS/MS	9	28729000	3244200	1861200	2602000	3152300	973730	2623600	7570100	6702200
O43657	O43657	Tetraspanin-6	TSPAN6	sp|O43657|TSN6_HUMAN Tetraspanin-6 OS=Homo sapiens OX=9606 GN=TSPAN6 PE=1 SV=1	By MS/MS	By matching	By matching	By MS/MS	By MS/MS	None	By MS/MS	By MS/MS	12	13226000	1044500	766630	714420	4852700	4530800	0	1317000	4167100
O43660	O43660	Pleiotropic regulator 1	PLRG1	sp|O43660|PLRG1_HUMAN Pleiotropic regulator 1 OS=Homo sapiens OX=9606 GN=PLRG1 PE=1 SV=1	By MS/MS	By MS/MS	By MS/MS	By MS/MS	By MS/MS	By MS/MS	By MS/MS	By MS/MS	28	67277000	4961000	5337300	5921400	13445000	12260000	4549300	9309800	11494000
O43663	O43663	Protein regulator of cytokinesis 1	PRC1	sp|O43663|PRC1_HUMAN Protein regulator of cytokinesis 1 OS=Homo sapiens OX=9606 GN=PRC1 PE=1 SV=2	By MS/MS	By MS/MS	By matching	By MS/MS	By MS/MS	By MS/MS	By MS/MS	By MS/MS	30	20326000	1195700	374360	467170	5717800	7060800	588190	1635400	3287000
O43670	O43670	BUB3-interacting and GLEBS motif-containing protein ZNF207	ZNF207	sp|O43670|ZN207_HUMAN BUB3-interacting and GLEBS motif-containing protein ZNF207 OS=Homo sapiens OX=9606 GN=ZNF207 PE=1 SV=1	By MS/MS	By matching	By MS/MS	By MS/MS	By MS/MS	By MS/MS	By MS/MS	By MS/MS	6	136740000	19099000	3386100	2974300	48663000	23187000	3528100	14442000	21464000
O43674	O43674	NADH dehydrogenase [ubiquinone] 1 beta subcomplex subunit 5, mitochondrial	NDUFB5	sp|O43674|NDUB5_HUMAN NADH dehydrogenase [ubiquinone] 1 beta subcomplex subunit 5, mitochondrial OS=Homo sapiens OX=9606 GN=NDUFB5 PE=1 SV=1	By matching	None	None	By MS/MS	By MS/MS	None	None	By MS/MS	9	23008000	864570	0	0	9965300	9752900	0	0	2425500
O43681	O43681	ATPase GET3	GET3	sp|O43681|GET3_HUMAN ATPase GET3 OS=Homo sapiens OX=9606 GN=GET3 PE=1 SV=2	By MS/MS	By matching	By matching	By MS/MS	By MS/MS	By matching	By MS/MS	By matching	15	10233000	799540	1240400	929880	982560	1928700	1114500	1271500	1966000
O43684	O43684	Mitotic checkpoint protein BUB3	BUB3	sp|O43684|BUB3_HUMAN Mitotic checkpoint protein BUB3 OS=Homo sapiens OX=9606 GN=BUB3 PE=1 SV=1	By MS/MS	By MS/MS	By MS/MS	By MS/MS	By MS/MS	By MS/MS	By MS/MS	By MS/MS	15	512890000	36355000	48909000	51396000	54778000	63799000	57127000	113450000	87081000
O43707	O43707	Alpha-actinin-4	ACTN4	sp|O43707|ACTN4_HUMAN Alpha-actinin-4 OS=Homo sapiens OX=9606 GN=ACTN4 PE=1 SV=2	By MS/MS	By MS/MS	By MS/MS	By MS/MS	By MS/MS	By MS/MS	By MS/MS	By MS/MS	55	3.0195e+09	260980000	294470000	268320000	314150000	360270000	329050000	592050000	600200000
O43747	O43747	AP-1 complex subunit gamma-1	AP1G1	sp|O43747|AP1G1_HUMAN AP-1 complex subunit gamma-1 OS=Homo sapiens OX=9606 GN=AP1G1 PE=1 SV=5	By MS/MS	By MS/MS	By MS/MS	By MS/MS	By MS/MS	By MS/MS	By MS/MS	By MS/MS	34	32049000	2155300	2041800	2285300	5496400	3893400	3009500	5484200	7683500
O43752	O43752	Syntaxin-6	STX6	sp|O43752|STX6_HUMAN Syntaxin-6 OS=Homo sapiens OX=9606 GN=STX6 PE=1 SV=1	By matching	None	By matching	By MS/MS	By MS/MS	By matching	None	By matching	12	13832000	547860	0	736740	5394500	6012800	680590	0	1140200
O43760	O43760	Synaptogyrin-2	SYNGR2	sp|O43760|SNG2_HUMAN Synaptogyrin-2 OS=Homo sapiens OX=9606 GN=SYNGR2 PE=1 SV=1	By matching	None	None	By MS/MS	By MS/MS	None	By matching	By MS/MS	7	42080000	4273800	0	0	13282000	14408000	0	2027900	8088200
O43776	O43776	Asparagine--tRNA ligase, cytoplasmic	NARS1	sp|O43776|SYNC_HUMAN Asparagine--tRNA ligase, cytoplasmic OS=Homo sapiens OX=9606 GN=NARS1 PE=1 SV=1	By matching	By MS/MS	None	By MS/MS	By MS/MS	By matching	By matching	By MS/MS	22	7701900	184020	278700	0	1493600	2006700	266040	1043400	2429400
O43795;Q9UBC5	O43795	Unconventional myosin-Ib	MYO1B	sp|O43795|MYO1B_HUMAN Unconventional myosin-Ib OS=Homo sapiens OX=9606 GN=MYO1B PE=1 SV=3	By MS/MS	By MS/MS	By MS/MS	By MS/MS	By MS/MS	By MS/MS	By MS/MS	By MS/MS	62	73654000	6415100	6258700	5813500	14215000	14637000	5359300	9246000	11709000
O43809	O43809	Cleavage and polyadenylation specificity factor subunit 5	NUDT21	sp|O43809|CPSF5_HUMAN Cleavage and polyadenylation specificity factor subunit 5 OS=Homo sapiens OX=9606 GN=NUDT21 PE=1 SV=1	By MS/MS	By MS/MS	By MS/MS	By MS/MS	By MS/MS	By MS/MS	By MS/MS	By MS/MS	13	358920000	29599000	27225000	29371000	46488000	47781000	34779000	85637000	58041000
O43815;Q13033	O43815	Striatin	STRN	sp|O43815|STRN_HUMAN Striatin OS=Homo sapiens OX=9606 GN=STRN PE=1 SV=4	By MS/MS	By MS/MS	By matching	By MS/MS	By MS/MS	By MS/MS	By MS/MS	By MS/MS	36	25808000	674920	2987000	3044600	2451300	1584300	3607500	6133800	5325000
O43818	O43818	U3 small nucleolar RNA-interacting protein 2	RRP9	sp|O43818|U3IP2_HUMAN U3 small nucleolar RNA-interacting protein 2 OS=Homo sapiens OX=9606 GN=RRP9 PE=1 SV=1	By MS/MS	By MS/MS	By MS/MS	By MS/MS	By MS/MS	By MS/MS	By MS/MS	By MS/MS	24	179260000	15204000	13998000	11563000	28502000	38627000	11445000	25230000	34689000
O43823	O43823	A-kinase anchor protein 8	AKAP8	sp|O43823|AKAP8_HUMAN A-kinase anchor protein 8 OS=Homo sapiens OX=9606 GN=AKAP8 PE=1 SV=1	By MS/MS	By MS/MS	By matching	By MS/MS	By MS/MS	By matching	By MS/MS	By MS/MS	24	22424000	943730	1790700	797050	5777300	3735100	1473700	3536300	4370500
O43837	O43837	Isocitrate dehydrogenase [NAD] subunit beta, mitochondrial	IDH3B	sp|O43837|IDH3B_HUMAN Isocitrate dehydrogenase [NAD] subunit beta, mitochondrial OS=Homo sapiens OX=9606 GN=IDH3B PE=1 SV=2	By MS/MS	By MS/MS	By MS/MS	By MS/MS	By MS/MS	By MS/MS	By MS/MS	By MS/MS	21	38263000	2213700	1984000	1924700	7196200	12072000	2500600	3743000	6628700
O43852	O43852	Calumenin	CALU	sp|O43852|CALU_HUMAN Calumenin OS=Homo sapiens OX=9606 GN=CALU PE=1 SV=2	By MS/MS	By matching	By matching	By MS/MS	By matching	By matching	By MS/MS	By matching	16	28741000	3029200	2318000	2857200	4380500	5915900	3213700	5311600	1714800
O43854	O43854	EGF-like repeat and discoidin I-like domain-containing protein 3	EDIL3	sp|O43854|EDIL3_HUMAN EGF-like repeat and discoidin I-like domain-containing protein 3 OS=Homo sapiens OX=9606 GN=EDIL3 PE=1 SV=1	By matching	None	None	By MS/MS	By MS/MS	None	By matching	By matching	26	3580000	279000	0	0	1776200	1384100	0	357140	419670
O43865;Q96HN2	O43865;Q96HN2	S-adenosylhomocysteine hydrolase-like protein 1;Adenosylhomocysteinase 3	AHCYL1;AHCYL2	sp|O43865|SAHH2_HUMAN S-adenosylhomocysteine hydrolase-like protein 1 OS=Homo sapiens OX=9606 GN=AHCYL1 PE=1 SV=2;sp|Q96HN2|SAHH3_HUMAN Adenosylhomocysteinase 3 OS=Homo sapiens OX=9606 GN=AHCYL2 PE=1 SV=1	By matching	By matching	None	By matching	By MS/MS	None	By MS/MS	By matching	28	2071100	436220	321930	0	581160	968340	0	780870	848830
O43913	O43913	Origin recognition complex subunit 5	ORC5	sp|O43913|ORC5_HUMAN Origin recognition complex subunit 5 OS=Homo sapiens OX=9606 GN=ORC5 PE=1 SV=1	By MS/MS	By MS/MS	By MS/MS	By MS/MS	By MS/MS	By MS/MS	By matching	By MS/MS	25	21960000	1933500	3473500	4405300	2074600	2525500	4675500	595880	2276200
O43920	O43920	NADH dehydrogenase [ubiquinone] iron-sulfur protein 5	NDUFS5	sp|O43920|NDUS5_HUMAN NADH dehydrogenase [ubiquinone] iron-sulfur protein 5 OS=Homo sapiens OX=9606 GN=NDUFS5 PE=1 SV=3	None	None	None	By MS/MS	None	None	None	None	6	4745200	0	0	0	4745200	0	0	0	0
O60216;Q9H4I0	O60216	Double-strand-break repair protein rad21 homolog;64-kDa C-terminal product	RAD21	sp|O60216|RAD21_HUMAN Double-strand-break repair protein rad21 homolog OS=Homo sapiens OX=9606 GN=RAD21 PE=1 SV=2	By MS/MS	By matching	By MS/MS	By MS/MS	By MS/MS	By MS/MS	By MS/MS	By MS/MS	26	42244000	2358400	1256300	2081000	13837000	11181000	1798700	3364400	6366300
O60231	O60231	Pre-mRNA-splicing factor ATP-dependent RNA helicase DHX16	DHX16	sp|O60231|DHX16_HUMAN Pre-mRNA-splicing factor ATP-dependent RNA helicase DHX16 OS=Homo sapiens OX=9606 GN=DHX16 PE=1 SV=2	By MS/MS	By matching	By matching	By MS/MS	By MS/MS	By matching	By MS/MS	By MS/MS	51	20810000	1294900	767030	476640	5688600	7721200	460550	1568900	2832600
O60244	O60244	Mediator of RNA polymerase II transcription subunit 14	MED14	sp|O60244|MED14_HUMAN Mediator of RNA polymerase II transcription subunit 14 OS=Homo sapiens OX=9606 GN=MED14 PE=1 SV=2	By matching	By matching	None	By MS/MS	By MS/MS	By matching	By matching	By matching	65	840290	29268	61907	0	202650	285740	45740	92623	122370
O60256	O60256	Phosphoribosyl pyrophosphate synthase-associated protein 2	PRPSAP2	sp|O60256|KPRB_HUMAN Phosphoribosyl pyrophosphate synthase-associated protein 2 OS=Homo sapiens OX=9606 GN=PRPSAP2 PE=1 SV=1	By MS/MS	By matching	By matching	By MS/MS	By MS/MS	By matching	By matching	By MS/MS	23	10098000	850500	923860	260500	2056800	2525600	661930	1244300	1574900
O60264	O60264	SWI/SNF-related matrix-associated actin-dependent regulator of chromatin subfamily A member 5	SMARCA5	sp|O60264|SMCA5_HUMAN SWI/SNF-related matrix-associated actin-dependent regulator of chromatin subfamily A member 5 OS=Homo sapiens OX=9606 GN=SMARCA5 PE=1 SV=1	By MS/MS	By MS/MS	By MS/MS	By MS/MS	By MS/MS	By MS/MS	By MS/MS	By MS/MS	56	119270000	5182500	2137500	1802300	42037000	43505000	2419000	5785500	16397000
O60287	O60287	Nucleolar pre-ribosomal-associated protein 1	URB1	sp|O60287|NPA1P_HUMAN Nucleolar pre-ribosomal-associated protein 1 OS=Homo sapiens OX=9606 GN=URB1 PE=1 SV=4	By MS/MS	By matching	By matching	By MS/MS	By MS/MS	By matching	By matching	By MS/MS	109	4027100	287470	266210	42108	1081200	1194400	267780	267630	620260
O60306	O60306	RNA helicase aquarius	AQR	sp|O60306|AQR_HUMAN RNA helicase aquarius OS=Homo sapiens OX=9606 GN=AQR PE=1 SV=4	By MS/MS	By matching	By MS/MS	By MS/MS	By MS/MS	By MS/MS	By MS/MS	By MS/MS	65	12572000	642650	462530	323610	2054600	4649100	686880	1317600	2434800
O60313	O60313	Dynamin-like 120 kDa protein, mitochondrial;Dynamin-like 120 kDa protein, form S1	OPA1	sp|O60313|OPA1_HUMAN Dynamin-like GTPase OPA1, mitochondrial OS=Homo sapiens OX=9606 GN=OPA1 PE=1 SV=3	By MS/MS	By MS/MS	By MS/MS	By MS/MS	By MS/MS	By MS/MS	By MS/MS	By MS/MS	55	47048000	4303300	3532600	3866400	8476600	10443000	4528300	4766600	7131400
O60341	O60341	Lysine-specific histone demethylase 1A	KDM1A	sp|O60341|KDM1A_HUMAN Lysine-specific histone demethylase 1A OS=Homo sapiens OX=9606 GN=KDM1A PE=1 SV=2	By matching	By matching	By MS/MS	By MS/MS	By MS/MS	By MS/MS	By MS/MS	By MS/MS	37	10979000	368600	336450	493680	2309200	3445900	530940	1725600	1768400
O60506	O60506	Heterogeneous nuclear ribonucleoprotein Q	SYNCRIP	sp|O60506|HNRPQ_HUMAN Heterogeneous nuclear ribonucleoprotein Q OS=Homo sapiens OX=9606 GN=SYNCRIP PE=1 SV=2	By MS/MS	By MS/MS	By MS/MS	By MS/MS	By MS/MS	By MS/MS	By MS/MS	By MS/MS	32	1.0245e+09	72412000	60021000	60557000	218230000	239550000	83779000	119470000	170530000
O60524	O60524	Ribosome quality control complex subunit NEMF	NEMF	sp|O60524|NEMF_HUMAN Ribosome quality control complex subunit NEMF OS=Homo sapiens OX=9606 GN=NEMF PE=1 SV=4	By matching	By matching	By matching	By MS/MS	By MS/MS	By matching	None	By MS/MS	51	8743400	552950	472290	410890	2621200	3073900	529290	0	1082900
O60563	O60563	Cyclin-T1	CCNT1	sp|O60563|CCNT1_HUMAN Cyclin-T1 OS=Homo sapiens OX=9606 GN=CCNT1 PE=1 SV=1	By matching	By matching	None	By MS/MS	By MS/MS	By matching	By matching	By matching	26	1234300	928960	578390	0	488970	444080	1227600	113620	187590
O60568	O60568	Multifunctional procollagen lysine hydroxylase and glycosyltransferase LH3;Procollagen-lysine,2-oxoglutarate 5-dioxygenase 3;Procollagen glycosyltransferase	PLOD3	sp|O60568|PLOD3_HUMAN Multifunctional procollagen lysine hydroxylase and glycosyltransferase LH3 OS=Homo sapiens OX=9606 GN=PLOD3 PE=1 SV=1	By MS/MS	By MS/MS	By MS/MS	By MS/MS	By MS/MS	By MS/MS	By MS/MS	By MS/MS	42	196430000	16290000	14675000	13436000	33312000	28718000	20658000	30558000	38783000
O60573	O60573	Eukaryotic translation initiation factor 4E type 2	EIF4E2	sp|O60573|IF4E2_HUMAN Eukaryotic translation initiation factor 4E type 2 OS=Homo sapiens OX=9606 GN=EIF4E2 PE=1 SV=1	By matching	None	None	By MS/MS	By MS/MS	None	None	By matching	12	3303200	418220	0	0	954640	1522700	0	0	407680
O60613	O60613	Selenoprotein F	SELENOF	sp|O60613|SEP15_HUMAN Selenoprotein F OS=Homo sapiens OX=9606 GN=SELENOF PE=1 SV=4	By matching	By matching	None	By matching	By matching	By matching	By MS/MS	By MS/MS	9	14682000	2421400	1257500	0	1400300	1661200	1570600	2923100	3447700
O60645	O60645	Exocyst complex component 3	EXOC3	sp|O60645|EXOC3_HUMAN Exocyst complex component 3 OS=Homo sapiens OX=9606 GN=EXOC3 PE=1 SV=3	By matching	By matching	By matching	By MS/MS	By MS/MS	By matching	By matching	By MS/MS	35	754950	376840	284040	335590	387460	367500	465120	608870	636530
O60664	O60664	Perilipin-3	PLIN3	sp|O60664|PLIN3_HUMAN Perilipin-3 OS=Homo sapiens OX=9606 GN=PLIN3 PE=1 SV=3	By matching	By matching	By matching	By MS/MS	By matching	By matching	By MS/MS	By MS/MS	26	8772300	906140	473140	555330	1587100	1601200	749600	1786400	1113400
O60684;O15131	O60684;O15131	Importin subunit alpha-7;Importin subunit alpha-6	KPNA6;KPNA5	sp|O60684|IMA7_HUMAN Importin subunit alpha-7 OS=Homo sapiens OX=9606 GN=KPNA6 PE=1 SV=1;sp|O15131|IMA6_HUMAN Importin subunit alpha-6 OS=Homo sapiens OX=9606 GN=KPNA5 PE=1 SV=3	By MS/MS	By MS/MS	By MS/MS	By MS/MS	By MS/MS	By MS/MS	By MS/MS	By MS/MS	22	69633000	5755700	5544800	5864300	16377000	8142400	4545400	8056900	15347000
O60701	O60701	UDP-glucose 6-dehydrogenase	UGDH	sp|O60701|UGDH_HUMAN UDP-glucose 6-dehydrogenase OS=Homo sapiens OX=9606 GN=UGDH PE=1 SV=1	By MS/MS	By MS/MS	By MS/MS	By MS/MS	By MS/MS	By MS/MS	By matching	By MS/MS	27	8568500	710870	281270	969740	1555400	1585200	381500	1615500	1469000
O60711	O60711	Leupaxin	LPXN	sp|O60711|LPXN_HUMAN Leupaxin OS=Homo sapiens OX=9606 GN=LPXN PE=1 SV=1	By matching	By matching	By matching	By MS/MS	By matching	None	By matching	By matching	15	9959300	1103400	617310	857090	2147500	1206700	0	1571100	2456200
O60716	O60716	Catenin delta-1	CTNND1	sp|O60716|CTND1_HUMAN Catenin delta-1 OS=Homo sapiens OX=9606 GN=CTNND1 PE=1 SV=1	By MS/MS	By MS/MS	By MS/MS	By MS/MS	By MS/MS	By MS/MS	By MS/MS	By MS/MS	48	100620000	9984900	9472400	8387100	17798000	17759000	7644500	12483000	17094000
O60762	O60762	Dolichol-phosphate mannosyltransferase subunit 1	DPM1	sp|O60762|DPM1_HUMAN Dolichol-phosphate mannosyltransferase subunit 1 OS=Homo sapiens OX=9606 GN=DPM1 PE=1 SV=1	By MS/MS	None	By matching	By MS/MS	By MS/MS	None	By matching	By MS/MS	15	13220000	4289400	0	1852700	2397200	1525100	0	846180	2309900
O60763;REV__Q5VZ89	O60763	General vesicular transport factor p115	USO1	sp|O60763|USO1_HUMAN General vesicular transport factor p115 OS=Homo sapiens OX=9606 GN=USO1 PE=1 SV=2	By MS/MS	By MS/MS	By MS/MS	By MS/MS	By MS/MS	By MS/MS	By MS/MS	By MS/MS	41	16260000	1436800	1728300	1587300	1805500	2441200	1534400	2688600	3037900
O60783	O60783	Small ribosomal subunit protein uS14m	MRPS14	sp|O60783|RT14_HUMAN Small ribosomal subunit protein uS14m OS=Homo sapiens OX=9606 GN=MRPS14 PE=1 SV=1	By matching	None	None	By matching	By matching	By MS/MS	By MS/MS	By MS/MS	7	20670000	2060100	0	0	5359500	3963600	2136000	3625200	3525300
O60784	O60784	Target of Myb1 membrane trafficking protein	TOM1	sp|O60784|TOM1_HUMAN Target of Myb1 membrane trafficking protein OS=Homo sapiens OX=9606 GN=TOM1 PE=1 SV=2	By MS/MS	By MS/MS	By MS/MS	By MS/MS	By matching	By MS/MS	By MS/MS	By MS/MS	18	10789000	1329700	588610	1521000	1704700	1126500	1020400	5241700	1087700
O60814;P57053	O60814;P57053	Histone H2B type 1-K;Histone H2B type F-S	H2BC12;H2BC12L	sp|O60814|H2B1K_HUMAN Histone H2B type 1-K OS=Homo sapiens OX=9606 GN=H2BC12 PE=1 SV=3;sp|P57053|H2BFS_HUMAN Histone H2B type F-S OS=Homo sapiens OX=9606 GN=H2BC12L PE=1 SV=2	By matching	By matching	By matching	By MS/MS	By matching	By MS/MS	By matching	By matching	7	7596200	3742200	612030	677890	1838600	949510	1429200	5128100	2089100
O60826	O60826	Coiled-coil domain-containing protein 22	CCDC22	sp|O60826|CCD22_HUMAN Coiled-coil domain-containing protein 22 OS=Homo sapiens OX=9606 GN=CCDC22 PE=1 SV=1	By MS/MS	By matching	By matching	By MS/MS	By MS/MS	By matching	By matching	By MS/MS	36	2683100	474600	1238300	931720	741450	721440	1474800	2105800	745560
O60828	O60828	Polyglutamine-binding protein 1	PQBP1	sp|O60828|PQBP1_HUMAN Polyglutamine-binding protein 1 OS=Homo sapiens OX=9606 GN=PQBP1 PE=1 SV=1	By MS/MS	By MS/MS	By MS/MS	By MS/MS	By MS/MS	By MS/MS	By MS/MS	By MS/MS	9	156620000	13668000	14313000	16793000	15096000	17166000	23727000	32753000	23099000
O60831	O60831	PRA1 family protein 2	PRAF2	sp|O60831|PRAF2_HUMAN PRA1 family protein 2 OS=Homo sapiens OX=9606 GN=PRAF2 PE=1 SV=1	None	By matching	By matching	By MS/MS	By MS/MS	By MS/MS	None	None	4	96750000	0	7425600	7908200	37874000	35478000	8064400	0	0
O60832	O60832	H/ACA ribonucleoprotein complex subunit DKC1	DKC1	sp|O60832|DKC1_HUMAN H/ACA ribonucleoprotein complex subunit DKC1 OS=Homo sapiens OX=9606 GN=DKC1 PE=1 SV=3	By MS/MS	By MS/MS	By MS/MS	By MS/MS	By MS/MS	By MS/MS	By MS/MS	By MS/MS	29	217140000	14012000	11930000	12819000	49687000	46191000	12023000	35934000	34546000
O60841	O60841	Eukaryotic translation initiation factor 5B	EIF5B	sp|O60841|IF2P_HUMAN Eukaryotic translation initiation factor 5B OS=Homo sapiens OX=9606 GN=EIF5B PE=1 SV=4	By MS/MS	By MS/MS	By MS/MS	By MS/MS	By MS/MS	By MS/MS	By MS/MS	By MS/MS	51	141630000	10410000	8523100	6676300	30348000	28712000	13120000	15236000	28609000
O60869	O60869	Endothelial differentiation-related factor 1	EDF1	sp|O60869|EDF1_HUMAN Endothelial differentiation-related factor 1 OS=Homo sapiens OX=9606 GN=EDF1 PE=1 SV=1	By MS/MS	By MS/MS	By MS/MS	By MS/MS	By MS/MS	By MS/MS	By MS/MS	By MS/MS	10	125050000	8504400	6502800	6763900	32983000	25622000	9267600	15524000	19878000
O60884	O60884	DnaJ homolog subfamily A member 2	DNAJA2	sp|O60884|DNJA2_HUMAN DnaJ homolog subfamily A member 2 OS=Homo sapiens OX=9606 GN=DNAJA2 PE=1 SV=1	By MS/MS	By MS/MS	By MS/MS	By MS/MS	By MS/MS	By MS/MS	By MS/MS	By MS/MS	20	152740000	11301000	13707000	16229000	22039000	16198000	15148000	34204000	23914000
O60885;Q15059	O60885	Bromodomain-containing protein 4	BRD4	sp|O60885|BRD4_HUMAN Bromodomain-containing protein 4 OS=Homo sapiens OX=9606 GN=BRD4 PE=1 SV=2	By MS/MS	By MS/MS	By MS/MS	By MS/MS	By MS/MS	By MS/MS	By matching	By MS/MS	42	8188500	350560	2417600	1327800	1432200	1868600	1142400	608810	1038400
O60925	O60925	Prefoldin subunit 1	PFDN1	sp|O60925|PFD1_HUMAN Prefoldin subunit 1 OS=Homo sapiens OX=9606 GN=PFDN1 PE=1 SV=2	None	None	None	None	By matching	By matching	By MS/MS	None	8	2905300	0	0	0	0	749130	571380	1584800	0
O60934	O60934	Nibrin	NBN	sp|O60934|NBN_HUMAN Nibrin OS=Homo sapiens OX=9606 GN=NBN PE=1 SV=1	By matching	None	By matching	By MS/MS	By MS/MS	By matching	By matching	By MS/MS	40	3451900	118360	0	275310	916720	791680	149810	596670	603370
O75027	O75027	Iron-sulfur clusters transporter ABCB7, mitochondrial	ABCB7	sp|O75027|ABCB7_HUMAN Iron-sulfur clusters transporter ABCB7, mitochondrial OS=Homo sapiens OX=9606 GN=ABCB7 PE=1 SV=2	By MS/MS	None	By matching	By MS/MS	By MS/MS	By MS/MS	By matching	By MS/MS	31	16994000	787380	0	148410	6016400	6154000	1164900	116350	2871500
O75063	O75063	Glycosaminoglycan xylosylkinase	FAM20B	sp|O75063|XYLK_HUMAN Glycosaminoglycan xylosylkinase OS=Homo sapiens OX=9606 GN=FAM20B PE=1 SV=1	None	None	None	By MS/MS	By MS/MS	None	None	None	19	939170	0	0	0	589190	349980	0	0	0
O75083	O75083	WD repeat-containing protein 1	WDR1	sp|O75083|WDR1_HUMAN WD repeat-containing protein 1 OS=Homo sapiens OX=9606 GN=WDR1 PE=1 SV=4	By MS/MS	By MS/MS	By MS/MS	By MS/MS	By MS/MS	By MS/MS	By MS/MS	By MS/MS	31	1556400	974810	1994500	1634000	809550	746830	3262300	3806700	2540400
O75116	O75116	Rho-associated protein kinase 2	ROCK2	sp|O75116|ROCK2_HUMAN Rho-associated protein kinase 2 OS=Homo sapiens OX=9606 GN=ROCK2 PE=1 SV=4	By matching	By matching	By matching	By MS/MS	By MS/MS	By matching	By MS/MS	By MS/MS	79	3795400	598810	369710	310950	694880	765400	287710	87514	680460
O75122	O75122	CLIP-associating protein 2	CLASP2	sp|O75122|CLAP2_HUMAN CLIP-associating protein 2 OS=Homo sapiens OX=9606 GN=CLASP2 PE=1 SV=3	By matching	By matching	None	By MS/MS	By MS/MS	None	By matching	By matching	74	2901400	212260	44848	0	1047900	1146300	0	214670	235460
O75127	O75127	Pentatricopeptide repeat-containing protein 1, mitochondrial	PTCD1	sp|O75127|PTCD1_HUMAN Pentatricopeptide repeat-containing protein 1, mitochondrial OS=Homo sapiens OX=9606 GN=PTCD1 PE=1 SV=2	By matching	None	None	None	By MS/MS	None	None	None	34	681150	100650	0	0	0	580500	0	0	0
O75131;Q96A23;Q9UBL6;Q8IYJ1;Q96FN4;Q9HCH3;O95741	O75131	Copine-3	CPNE3	sp|O75131|CPNE3_HUMAN Copine-3 OS=Homo sapiens OX=9606 GN=CPNE3 PE=1 SV=1	By MS/MS	By MS/MS	By MS/MS	By MS/MS	By MS/MS	By MS/MS	By MS/MS	By MS/MS	26	133460000	13666000	12000000	11710000	14130000	20236000	12881000	19552000	29285000
O75146	O75146	Huntingtin-interacting protein 1-related protein	HIP1R	sp|O75146|HIP1R_HUMAN Huntingtin-interacting protein 1-related protein OS=Homo sapiens OX=9606 GN=HIP1R PE=1 SV=2	By MS/MS	By matching	By matching	By MS/MS	By MS/MS	By matching	By MS/MS	By MS/MS	63	12045000	476430	898130	344610	2976400	3334000	749180	1611900	1653900
O75150	O75150	E3 ubiquitin-protein ligase BRE1B	RNF40	sp|O75150|BRE1B_HUMAN E3 ubiquitin-protein ligase BRE1B OS=Homo sapiens OX=9606 GN=RNF40 PE=1 SV=5	None	None	None	By matching	By MS/MS	None	By MS/MS	None	49	1050800	0	0	0	293560	571950	0	185310	0
O75152;P0DQW0;A0A1B0GTU1	O75152;P0DQW0	Zinc finger CCCH domain-containing protein 11A;Zinc finger CCCH domain-containing protein 11C	ZC3H11A;ZC3H11C	sp|O75152|ZC11A_HUMAN Zinc finger CCCH domain-containing protein 11A OS=Homo sapiens OX=9606 GN=ZC3H11A PE=1 SV=3;sp|P0DQW0|ZC11C_HUMAN Zinc finger CCCH domain-containing protein 11C OS=Homo sapiens OX=9606 GN=ZC3H11C PE=1 SV=1	By matching	By matching	By matching	By MS/MS	By MS/MS	By matching	None	By MS/MS	41	3766900	138380	130760	123660	1319300	1304300	47511	0	750420
O75153;Q9Y5I4	O75153	Clustered mitochondria protein homolog	CLUH	sp|O75153|CLU_HUMAN Clustered mitochondria protein homolog OS=Homo sapiens OX=9606 GN=CLUH PE=1 SV=2	By MS/MS	By MS/MS	By MS/MS	By MS/MS	By MS/MS	By matching	By MS/MS	By MS/MS	69	4634300	700000	197320	363540	590750	579050	166820	884810	1152000
O75165	O75165	DnaJ homolog subfamily C member 13	DNAJC13	sp|O75165|DJC13_HUMAN DnaJ homolog subfamily C member 13 OS=Homo sapiens OX=9606 GN=DNAJC13 PE=1 SV=5	By MS/MS	By MS/MS	By matching	By MS/MS	By MS/MS	By matching	By matching	By MS/MS	110	284720	39490	265960	208800	137720	83181	39598	41830	80620
O75175	O75175	CCR4-NOT transcription complex subunit 3	CNOT3	sp|O75175|CNOT3_HUMAN CCR4-NOT transcription complex subunit 3 OS=Homo sapiens OX=9606 GN=CNOT3 PE=1 SV=1	By matching	By matching	None	By MS/MS	By MS/MS	None	None	By MS/MS	19	11917000	1425200	584680	0	3873200	4380900	0	0	1653000
O75208	O75208	Ubiquinone biosynthesis protein COQ9, mitochondrial	COQ9	sp|O75208|COQ9_HUMAN Ubiquinone biosynthesis protein COQ9, mitochondrial OS=Homo sapiens OX=9606 GN=COQ9 PE=1 SV=1	By MS/MS	By matching	None	By matching	By matching	None	By matching	By MS/MS	12	4710800	622160	356740	0	849000	746370	0	801190	1335400
O75251	O75251	NADH dehydrogenase [ubiquinone] iron-sulfur protein 7, mitochondrial	NDUFS7	sp|O75251|NDUS7_HUMAN NADH dehydrogenase [ubiquinone] iron-sulfur protein 7, mitochondrial OS=Homo sapiens OX=9606 GN=NDUFS7 PE=1 SV=3	By matching	None	By matching	By MS/MS	By MS/MS	None	By matching	None	11	11130000	786840	0	500920	4610000	4097700	0	1134400	0
O75306	O75306	NADH dehydrogenase [ubiquinone] iron-sulfur protein 2, mitochondrial	NDUFS2	sp|O75306|NDUS2_HUMAN NADH dehydrogenase [ubiquinone] iron-sulfur protein 2, mitochondrial OS=Homo sapiens OX=9606 GN=NDUFS2 PE=1 SV=2	By MS/MS	By matching	By matching	By MS/MS	By MS/MS	By MS/MS	By matching	By MS/MS	25	7864800	2909000	1412900	460910	2450200	2338400	365360	903920	1346000
O75323	O75323	Protein NipSnap homolog 2	NIPSNAP2	sp|O75323|NIPS2_HUMAN Protein NipSnap homolog 2 OS=Homo sapiens OX=9606 GN=NIPSNAP2 PE=1 SV=1	By matching	None	By matching	By MS/MS	By matching	None	By matching	By matching	15	1255600	550460	0	439010	636030	619620	0	1084200	1423600
O75326	O75326	Semaphorin-7A	SEMA7A	sp|O75326|SEM7A_HUMAN Semaphorin-7A OS=Homo sapiens OX=9606 GN=SEMA7A PE=1 SV=1	By MS/MS	None	By matching	By MS/MS	By MS/MS	By matching	None	None	34	2064300	294260	0	292420	712780	596160	168690	0	0
O75340	O75340	Programmed cell death protein 6	PDCD6	sp|O75340|PDCD6_HUMAN Programmed cell death protein 6 OS=Homo sapiens OX=9606 GN=PDCD6 PE=1 SV=1	By matching	By matching	By matching	By MS/MS	By MS/MS	By matching	By MS/MS	By MS/MS	9	44418000	4863000	382860	2264700	1205300	18258000	1816300	12214000	5678900
O75348;O95670	O75348	V-type proton ATPase subunit G 1	ATP6V1G1	sp|O75348|VATG1_HUMAN V-type proton ATPase subunit G 1 OS=Homo sapiens OX=9606 GN=ATP6V1G1 PE=1 SV=3	By MS/MS	By MS/MS	By MS/MS	By MS/MS	By MS/MS	By MS/MS	By MS/MS	By MS/MS	6	234870000	15426000	12798000	12157000	53424000	38641000	16051000	38222000	48153000
O75352	O75352	Mannose-P-dolichol utilization defect 1 protein	MPDU1	sp|O75352|MPU1_HUMAN Mannose-P-dolichol utilization defect 1 protein OS=Homo sapiens OX=9606 GN=MPDU1 PE=1 SV=2	By MS/MS	By matching	None	By MS/MS	By MS/MS	By matching	By MS/MS	By MS/MS	4	68915000	4609500	1078000	0	21470000	27568000	1057900	2844700	10286000
O75367	O75367	Core histone macro-H2A.1	MACROH2A1	sp|O75367|H2AY_HUMAN Core histone macro-H2A.1 OS=Homo sapiens OX=9606 GN=MACROH2A1 PE=1 SV=5	By MS/MS	By MS/MS	By MS/MS	By MS/MS	By MS/MS	By MS/MS	By MS/MS	By MS/MS	16	573870000	30074000	19459000	18633000	174960000	174210000	36491000	39519000	80527000
O75369	O75369	Filamin-B	FLNB	sp|O75369|FLNB_HUMAN Filamin-B OS=Homo sapiens OX=9606 GN=FLNB PE=1 SV=2	By MS/MS	By MS/MS	By MS/MS	By MS/MS	By MS/MS	By MS/MS	By MS/MS	By MS/MS	134	51995000	3643500	7592100	7171000	3659000	5135900	9139400	8819200	6834900
O75380	O75380	NADH dehydrogenase [ubiquinone] iron-sulfur protein 6, mitochondrial	NDUFS6	sp|O75380|NDUS6_HUMAN NADH dehydrogenase [ubiquinone] iron-sulfur protein 6, mitochondrial OS=Homo sapiens OX=9606 GN=NDUFS6 PE=1 SV=1	By MS/MS	By MS/MS	By matching	By matching	By matching	By matching	By MS/MS	By MS/MS	8	14433000	1885500	1816300	1459800	2045300	644860	1243600	3044400	2937800
O75381	O75381	Peroxisomal membrane protein PEX14	PEX14	sp|O75381|PEX14_HUMAN Peroxisomal membrane protein PEX14 OS=Homo sapiens OX=9606 GN=PEX14 PE=1 SV=1	By MS/MS	By matching	By matching	By MS/MS	By MS/MS	None	None	By MS/MS	15	39210000	3298800	631930	924330	14249000	13033000	0	0	7072000
O75390	O75390	Citrate synthase, mitochondrial	CS	sp|O75390|CISY_HUMAN Citrate synthase, mitochondrial OS=Homo sapiens OX=9606 GN=CS PE=1 SV=2	By MS/MS	By MS/MS	By MS/MS	By MS/MS	By MS/MS	By MS/MS	By MS/MS	By MS/MS	19	315530000	21243000	11854000	16441000	73728000	87995000	18686000	39728000	45857000
O75396	O75396	Vesicle-trafficking protein SEC22b	SEC22B	sp|O75396|SC22B_HUMAN Vesicle-trafficking protein SEC22b OS=Homo sapiens OX=9606 GN=SEC22B PE=1 SV=5	By MS/MS	By MS/MS	By MS/MS	By MS/MS	By MS/MS	By MS/MS	By MS/MS	By MS/MS	12	773430000	61612000	17940000	20466000	250930000	263300000	9910100	37667000	111600000
O75400	O75400	Pre-mRNA-processing factor 40 homolog A	PRPF40A	sp|O75400|PR40A_HUMAN Pre-mRNA-processing factor 40 homolog A OS=Homo sapiens OX=9606 GN=PRPF40A PE=1 SV=2	By MS/MS	By MS/MS	By MS/MS	By MS/MS	By MS/MS	By MS/MS	By MS/MS	By MS/MS	34	142970000	8565800	11824000	12104000	26426000	18585000	12202000	27857000	25403000
O75410;O95359	O75410;O95359	Transforming acidic coiled-coil-containing protein 1;Transforming acidic coiled-coil-containing protein 2	TACC1;TACC2	sp|O75410|TACC1_HUMAN Transforming acidic coiled-coil-containing protein 1 OS=Homo sapiens OX=9606 GN=TACC1 PE=1 SV=2;sp|O95359|TACC2_HUMAN Transforming acidic coiled-coil-containing protein 2 OS=Homo sapiens OX=9606 GN=TACC2 PE=1 SV=3	By MS/MS	By MS/MS	By MS/MS	By MS/MS	By MS/MS	By MS/MS	By MS/MS	By MS/MS	42	7342300	766960	186520	823730	1085600	1130700	270110	1733900	1344800
O75431	O75431	Metaxin-2	MTX2	sp|O75431|MTX2_HUMAN Metaxin-2 OS=Homo sapiens OX=9606 GN=MTX2 PE=1 SV=1	By MS/MS	By MS/MS	By MS/MS	By MS/MS	By MS/MS	By MS/MS	By MS/MS	By MS/MS	11	16390000	4312300	5734800	5082800	6862600	1789700	2879300	8515100	3425500
O75436	O75436	Vacuolar protein sorting-associated protein 26A	VPS26A	sp|O75436|VP26A_HUMAN Vacuolar protein sorting-associated protein 26A OS=Homo sapiens OX=9606 GN=VPS26A PE=1 SV=2	By MS/MS	By MS/MS	By MS/MS	By MS/MS	By MS/MS	By MS/MS	By MS/MS	By MS/MS	18	156040000	14861000	16241000	16097000	19997000	20665000	22555000	24305000	21319000
O75439	O75439	Mitochondrial-processing peptidase subunit beta	PMPCB	sp|O75439|MPPB_HUMAN Mitochondrial-processing peptidase subunit beta OS=Homo sapiens OX=9606 GN=PMPCB PE=1 SV=2	By MS/MS	By MS/MS	By matching	By MS/MS	By MS/MS	By MS/MS	By MS/MS	By MS/MS	26	24407000	1583000	1096000	834730	3046200	4939100	2657900	4105800	6144400
O75446	O75446	Histone deacetylase complex subunit SAP30	SAP30	sp|O75446|SAP30_HUMAN Histone deacetylase complex subunit SAP30 OS=Homo sapiens OX=9606 GN=SAP30 PE=1 SV=1	By MS/MS	By MS/MS	By MS/MS	By MS/MS	By MS/MS	By MS/MS	By MS/MS	By MS/MS	9	56558000	3343900	2003500	1827500	12146000	12292000	4516700	10201000	10227000
O75448	O75448	Mediator of RNA polymerase II transcription subunit 24	MED24	sp|O75448|MED24_HUMAN Mediator of RNA polymerase II transcription subunit 24 OS=Homo sapiens OX=9606 GN=MED24 PE=1 SV=1	By matching	By matching	By matching	By MS/MS	By MS/MS	By matching	By MS/MS	By matching	51	5624100	244880	371760	359260	1562100	1299700	167100	589010	1030300
O75475;P51858	O75475	PC4 and SFRS1-interacting protein	PSIP1	sp|O75475|PSIP1_HUMAN PC4 and SFRS1-interacting protein OS=Homo sapiens OX=9606 GN=PSIP1 PE=1 SV=1	By MS/MS	By MS/MS	By MS/MS	By MS/MS	By MS/MS	By MS/MS	By MS/MS	By MS/MS	29	36875000	1560900	739100	1167500	10511000	11750000	2979600	2268500	5898700
O75477	O75477	Erlin-1	ERLIN1	sp|O75477|ERLN1_HUMAN Erlin-1 OS=Homo sapiens OX=9606 GN=ERLIN1 PE=1 SV=2	By MS/MS	By MS/MS	By MS/MS	By MS/MS	By MS/MS	By MS/MS	By MS/MS	By MS/MS	20	181960000	16756000	2989400	3954600	65562000	57846000	4108600	3579200	27163000
O75487	O75487	Glypican-4;Secreted glypican-4	GPC4	sp|O75487|GPC4_HUMAN Glypican-4 OS=Homo sapiens OX=9606 GN=GPC4 PE=1 SV=4	By matching	By matching	By MS/MS	By matching	By matching	By MS/MS	By matching	By MS/MS	24	10688000	1411800	1584900	1675200	1377900	4432800	1305800	4065200	3332700
O75489	O75489	NADH dehydrogenase [ubiquinone] iron-sulfur protein 3, mitochondrial	NDUFS3	sp|O75489|NDUS3_HUMAN NADH dehydrogenase [ubiquinone] iron-sulfur protein 3, mitochondrial OS=Homo sapiens OX=9606 GN=NDUFS3 PE=1 SV=1	By MS/MS	By matching	By MS/MS	By MS/MS	By MS/MS	By MS/MS	By MS/MS	By MS/MS	17	37396000	2384700	2667800	2080400	8570900	6634900	3924400	2631300	8501900
O75494;Q8WXF0	O75494	Serine/arginine-rich splicing factor 10	SRSF10	sp|O75494|SRS10_HUMAN Serine/arginine-rich splicing factor 10 OS=Homo sapiens OX=9606 GN=SRSF10 PE=1 SV=1	By MS/MS	By MS/MS	By MS/MS	By MS/MS	By MS/MS	By MS/MS	By MS/MS	By MS/MS	10	367050000	26428000	32471000	27784000	32536000	9142700	57911000	86095000	94682000
O75521	O75521	Enoyl-CoA delta isomerase 2	ECI2	sp|O75521|ECI2_HUMAN Enoyl-CoA delta isomerase 2 OS=Homo sapiens OX=9606 GN=ECI2 PE=1 SV=4	By matching	By matching	By matching	By MS/MS	By MS/MS	By MS/MS	By MS/MS	By MS/MS	17	14085000	606330	737780	613980	4653700	4756900	2108300	934330	1025900
O75525	O75525	KH domain-containing, RNA-binding, signal transduction-associated protein 3	KHDRBS3	sp|O75525|KHDR3_HUMAN KH domain-containing, RNA-binding, signal transduction-associated protein 3 OS=Homo sapiens OX=9606 GN=KHDRBS3 PE=1 SV=1	By MS/MS	By MS/MS	By MS/MS	By MS/MS	By MS/MS	By MS/MS	By MS/MS	By MS/MS	11	193090000	15006000	12674000	12603000	45436000	38917000	15771000	23741000	28943000
O75528	O75528	Transcriptional adapter 3	TADA3	sp|O75528|TADA3_HUMAN Transcriptional adapter 3 OS=Homo sapiens OX=9606 GN=TADA3 PE=1 SV=1	None	None	None	By matching	By MS/MS	None	None	None	20	1817700	0	0	0	1050700	767050	0	0	0
O75530	O75530	Polycomb protein EED	EED	sp|O75530|EED_HUMAN Polycomb protein EED OS=Homo sapiens OX=9606 GN=EED PE=1 SV=2	By MS/MS	By matching	By matching	By MS/MS	By MS/MS	By matching	By MS/MS	By MS/MS	24	8307100	561760	313560	710820	1728600	1889500	539490	962230	1601100
O75531	O75531	Barrier-to-autointegration factor;Barrier-to-autointegration factor, N-terminally processed	BANF1	sp|O75531|BAF_HUMAN Barrier-to-autointegration factor OS=Homo sapiens OX=9606 GN=BANF1 PE=1 SV=1	By MS/MS	By MS/MS	By matching	By MS/MS	By MS/MS	By MS/MS	By MS/MS	By MS/MS	5	201510000	11533000	8180600	5325300	76329000	37002000	7737900	26720000	28682000
O75533	O75533	Splicing factor 3B subunit 1	SF3B1	sp|O75533|SF3B1_HUMAN Splicing factor 3B subunit 1 OS=Homo sapiens OX=9606 GN=SF3B1 PE=1 SV=3	By MS/MS	By MS/MS	By MS/MS	By MS/MS	By MS/MS	By MS/MS	By MS/MS	By MS/MS	59	169540000	10082000	7037100	7611300	46325000	47694000	10470000	13239000	27083000
O75534	O75534	Cold shock domain-containing protein E1	CSDE1	sp|O75534|CSDE1_HUMAN Cold shock domain-containing protein E1 OS=Homo sapiens OX=9606 GN=CSDE1 PE=1 SV=2	By MS/MS	By MS/MS	By MS/MS	By MS/MS	By MS/MS	By MS/MS	By MS/MS	By MS/MS	48	104330000	9466300	11048000	10421000	10521000	12001000	11178000	21371000	18325000
O75569	O75569	Interferon-inducible double-stranded RNA-dependent protein kinase activator A	PRKRA	sp|O75569|PRKRA_HUMAN Interferon-inducible double-stranded RNA-dependent protein kinase activator A OS=Homo sapiens OX=9606 GN=PRKRA PE=1 SV=1	By MS/MS	By MS/MS	By MS/MS	By MS/MS	By MS/MS	By MS/MS	By MS/MS	By MS/MS	15	52629000	3491100	4180500	6877500	8678500	8287000	4229400	7149600	9735800
O75607	O75607	Nucleoplasmin-3	NPM3	sp|O75607|NPM3_HUMAN Nucleoplasmin-3 OS=Homo sapiens OX=9606 GN=NPM3 PE=1 SV=3	By MS/MS	By MS/MS	By MS/MS	By MS/MS	By MS/MS	By MS/MS	By MS/MS	By MS/MS	8	651130000	73691000	75781000	61703000	62052000	54371000	78755000	126750000	118030000
O75616	O75616	GTPase Era, mitochondrial	ERAL1	sp|O75616|ERAL1_HUMAN GTPase Era, mitochondrial OS=Homo sapiens OX=9606 GN=ERAL1 PE=1 SV=2	By matching	By matching	None	By MS/MS	By MS/MS	By matching	By MS/MS	By matching	22	8706900	640500	619260	0	1743300	2098400	862990	1075200	1667200
O75643	O75643	U5 small nuclear ribonucleoprotein 200 kDa helicase	SNRNP200	sp|O75643|U520_HUMAN U5 small nuclear ribonucleoprotein 200 kDa helicase OS=Homo sapiens OX=9606 GN=SNRNP200 PE=1 SV=2	By MS/MS	By MS/MS	By MS/MS	By MS/MS	By MS/MS	By MS/MS	By MS/MS	By MS/MS	113	216520000	15794000	16577000	16525000	34946000	40643000	23541000	25512000	42979000
O75683	O75683	Surfeit locus protein 6	SURF6	sp|O75683|SURF6_HUMAN Surfeit locus protein 6 OS=Homo sapiens OX=9606 GN=SURF6 PE=1 SV=3	By matching	By matching	By matching	By MS/MS	By MS/MS	By matching	By MS/MS	None	15	15462000	943390	419140	807160	3557400	5345000	1247700	3142100	0
O75694	O75694	Nuclear pore complex protein Nup155	NUP155	sp|O75694|NU155_HUMAN Nuclear pore complex protein Nup155 OS=Homo sapiens OX=9606 GN=NUP155 PE=1 SV=1	By MS/MS	By MS/MS	By MS/MS	By MS/MS	By MS/MS	By MS/MS	By MS/MS	By MS/MS	55	87070000	6507600	6582100	7351200	14357000	15255000	6892000	14787000	15338000
O75695	O75695	Protein XRP2	RP2	sp|O75695|XRP2_HUMAN Protein XRP2 OS=Homo sapiens OX=9606 GN=RP2 PE=1 SV=4	By MS/MS	By matching	By matching	By MS/MS	By MS/MS	None	By MS/MS	By MS/MS	16	9158200	1473000	345520	425730	2180700	2144400	0	630220	1958800
O75717	O75717	WD repeat and HMG-box DNA-binding protein 1	WDHD1	sp|O75717|WDHD1_HUMAN WD repeat and HMG-box DNA-binding protein 1 OS=Homo sapiens OX=9606 GN=WDHD1 PE=1 SV=1	By matching	By matching	By matching	By MS/MS	By MS/MS	By matching	By matching	By matching	55	2511400	188110	128910	174770	521700	560860	304570	218050	414380
O75718	O75718	Cartilage-associated protein	CRTAP	sp|O75718|CRTAP_HUMAN Cartilage-associated protein OS=Homo sapiens OX=9606 GN=CRTAP PE=1 SV=1	By MS/MS	By MS/MS	By MS/MS	By MS/MS	By MS/MS	By MS/MS	By MS/MS	By MS/MS	24	108580000	9547800	7890300	9339100	18998000	21140000	11102000	12377000	18184000
O75746	O75746	Electrogenic aspartate/glutamate antiporter SLC25A12, mitochondrial	SLC25A12	sp|O75746|S2512_HUMAN Electrogenic aspartate/glutamate antiporter SLC25A12, mitochondrial OS=Homo sapiens OX=9606 GN=SLC25A12 PE=1 SV=2	By MS/MS	By matching	By matching	By MS/MS	By MS/MS	By matching	By matching	By MS/MS	35	16600000	1115600	0	308810	6511700	6685500	0	385490	1593200
O75787	O75787	Renin receptor;Renin receptor N-terminal fragment;Renin receptor C-terminal fragment	ATP6AP2	sp|O75787|RENR_HUMAN Renin receptor OS=Homo sapiens OX=9606 GN=ATP6AP2 PE=1 SV=2	By matching	None	None	By MS/MS	By MS/MS	None	None	By matching	15	20004000	986850	0	0	8260800	8637700	0	0	2118400
O75817	O75817	Ribonuclease P protein subunit p20	POP7	sp|O75817|POP7_HUMAN Ribonuclease P protein subunit p20 OS=Homo sapiens OX=9606 GN=POP7 PE=1 SV=2	None	By matching	None	None	None	By MS/MS	None	By MS/MS	5	15557000	0	3691100	0	0	0	3905400	0	7960100
O75818	O75818	Ribonuclease P protein subunit p40	RPP40	sp|O75818|RPP40_HUMAN Ribonuclease P protein subunit p40 OS=Homo sapiens OX=9606 GN=RPP40 PE=1 SV=3	By MS/MS	By MS/MS	By matching	By matching	By matching	By MS/MS	By MS/MS	By MS/MS	19	15879000	1875700	1883700	294800	611980	497030	2536700	4158000	4021400
O75821	O75821	Eukaryotic translation initiation factor 3 subunit G	EIF3G	sp|O75821|EIF3G_HUMAN Eukaryotic translation initiation factor 3 subunit G OS=Homo sapiens OX=9606 GN=EIF3G PE=1 SV=2	By MS/MS	By MS/MS	By MS/MS	By MS/MS	By MS/MS	By MS/MS	By MS/MS	By MS/MS	17	210410000	21669000	24071000	19832000	28021000	25585000	28186000	26573000	36477000
O75822	O75822	Eukaryotic translation initiation factor 3 subunit J	EIF3J	sp|O75822|EIF3J_HUMAN Eukaryotic translation initiation factor 3 subunit J OS=Homo sapiens OX=9606 GN=EIF3J PE=1 SV=2	By MS/MS	By MS/MS	By MS/MS	By MS/MS	By MS/MS	By MS/MS	By MS/MS	By MS/MS	15	236070000	20826000	17492000	18135000	30769000	31460000	25518000	45767000	46100000
O75844	O75844	CAAX prenyl protease 1 homolog	ZMPSTE24	sp|O75844|FACE1_HUMAN CAAX prenyl protease 1 homolog OS=Homo sapiens OX=9606 GN=ZMPSTE24 PE=1 SV=2	By MS/MS	By matching	By matching	By MS/MS	By MS/MS	By matching	By matching	By MS/MS	19	26971000	1439100	248230	634030	10891000	8040100	245600	258860	5214600
O75874;P48735	O75874	Isocitrate dehydrogenase [NADP] cytoplasmic	IDH1	sp|O75874|IDHC_HUMAN Isocitrate dehydrogenase [NADP] cytoplasmic OS=Homo sapiens OX=9606 GN=IDH1 PE=1 SV=2	By MS/MS	By MS/MS	By MS/MS	By MS/MS	By MS/MS	By MS/MS	By MS/MS	By MS/MS	25	17138000	1943400	1830200	1035400	2137400	1217300	527720	4920800	3526000
O75880	O75880	Protein SCO1 homolog, mitochondrial	SCO1	sp|O75880|SCO1_HUMAN Protein SCO1 homolog, mitochondrial OS=Homo sapiens OX=9606 GN=SCO1 PE=1 SV=1	By matching	None	None	By MS/MS	By MS/MS	By matching	By matching	By matching	14	9170600	598480	0	0	3610700	3987400	438000	536030	664330
O75915	O75915	PRA1 family protein 3	ARL6IP5	sp|O75915|PRAF3_HUMAN PRA1 family protein 3 OS=Homo sapiens OX=9606 GN=ARL6IP5 PE=1 SV=1	By matching	By matching	By matching	By MS/MS	By MS/MS	By MS/MS	By MS/MS	By matching	6	45510000	3381400	1798700	1856800	9114000	12983000	3351000	5500700	7525300
O75934	O75934	Pre-mRNA-splicing factor SPF27	BCAS2	sp|O75934|SPF27_HUMAN Pre-mRNA-splicing factor SPF27 OS=Homo sapiens OX=9606 GN=BCAS2 PE=1 SV=1	By MS/MS	By MS/MS	By MS/MS	By MS/MS	By MS/MS	By MS/MS	By MS/MS	By MS/MS	13	353230000	28019000	29691000	32935000	35999000	38654000	30965000	86076000	70894000
O75935	O75935	Dynactin subunit 3	DCTN3	sp|O75935|DCTN3_HUMAN Dynactin subunit 3 OS=Homo sapiens OX=9606 GN=DCTN3 PE=1 SV=1	By MS/MS	By MS/MS	By MS/MS	By MS/MS	By matching	By MS/MS	By MS/MS	By MS/MS	11	32786000	5161800	4297500	4404300	7464000	1705800	4174800	3757200	1820500
O75937	O75937	DnaJ homolog subfamily C member 8	DNAJC8	sp|O75937|DNJC8_HUMAN DnaJ homolog subfamily C member 8 OS=Homo sapiens OX=9606 GN=DNAJC8 PE=1 SV=2	By matching	By matching	By matching	By MS/MS	By MS/MS	By MS/MS	By MS/MS	By MS/MS	14	24237000	2925500	3589100	656540	5724700	7597900	1005300	1341300	1396600
O75940	O75940	Survival of motor neuron-related-splicing factor 30	SMNDC1	sp|O75940|SPF30_HUMAN Survival of motor neuron-related-splicing factor 30 OS=Homo sapiens OX=9606 GN=SMNDC1 PE=1 SV=1	By MS/MS	By matching	By matching	By MS/MS	By MS/MS	By matching	By MS/MS	By MS/MS	9	70089000	5131100	4663000	7549800	12486000	16168000	4421100	10401000	9269000
O75947	O75947	ATP synthase subunit d, mitochondrial	ATP5PD	sp|O75947|ATP5H_HUMAN ATP synthase subunit d, mitochondrial OS=Homo sapiens OX=9606 GN=ATP5PD PE=1 SV=3	By MS/MS	By MS/MS	By MS/MS	By MS/MS	By MS/MS	By MS/MS	By MS/MS	By MS/MS	10	314660000	26790000	10945000	14062000	71012000	115850000	10224000	19880000	45893000
O75954	O75954	Tetraspanin-9	TSPAN9	sp|O75954|TSN9_HUMAN Tetraspanin-9 OS=Homo sapiens OX=9606 GN=TSPAN9 PE=1 SV=1	None	None	None	By matching	By MS/MS	None	None	None	9	4986700	0	0	0	2308900	2677800	0	0	0
O75955	O75955	Flotillin-1	FLOT1	sp|O75955|FLOT1_HUMAN Flotillin-1 OS=Homo sapiens OX=9606 GN=FLOT1 PE=1 SV=3	By MS/MS	By MS/MS	By MS/MS	By MS/MS	By MS/MS	By MS/MS	By MS/MS	By MS/MS	28	52426000	4117600	2700000	4158300	11073000	14790000	2720300	4008000	8858700
O75964	O75964	ATP synthase subunit g, mitochondrial	ATP5MG	sp|O75964|ATP5L_HUMAN ATP synthase subunit g, mitochondrial OS=Homo sapiens OX=9606 GN=ATP5MG PE=1 SV=3	By MS/MS	None	None	By MS/MS	By MS/MS	By matching	By matching	By MS/MS	6	94781000	7275100	0	0	44085000	22270000	4063500	2805700	14281000
O75976	O75976	Carboxypeptidase D	CPD	sp|O75976|CBPD_HUMAN Carboxypeptidase D OS=Homo sapiens OX=9606 GN=CPD PE=1 SV=2	By MS/MS	By MS/MS	By MS/MS	By MS/MS	By MS/MS	By MS/MS	By MS/MS	By MS/MS	71	483240000	53160000	87178000	104260000	18343000	19717000	78576000	63823000	58181000
O76021	O76021	Ribosomal L1 domain-containing protein 1	RSL1D1	sp|O76021|RL1D1_HUMAN Ribosomal L1 domain-containing protein 1 OS=Homo sapiens OX=9606 GN=RSL1D1 PE=1 SV=3	By MS/MS	By MS/MS	By MS/MS	By MS/MS	By MS/MS	By MS/MS	By MS/MS	By MS/MS	22	972990000	61957000	41433000	62511000	206600000	217640000	82723000	147010000	153120000
O76024	O76024	Wolframin	WFS1	sp|O76024|WFS1_HUMAN Wolframin OS=Homo sapiens OX=9606 GN=WFS1 PE=1 SV=2	By matching	None	By matching	By MS/MS	By MS/MS	None	None	By MS/MS	37	4211400	375340	0	147690	1560900	1529500	0	0	598020
O76031	O76031	ATP-dependent Clp protease ATP-binding subunit clpX-like, mitochondrial	CLPX	sp|O76031|CLPX_HUMAN ATP-dependent Clp protease ATP-binding subunit clpX-like, mitochondrial OS=Homo sapiens OX=9606 GN=CLPX PE=1 SV=2	By MS/MS	By MS/MS	By MS/MS	By MS/MS	By MS/MS	By MS/MS	By MS/MS	By MS/MS	40	20570000	951080	1211300	1013200	4151500	5136800	1733600	2952600	3419700
O76071	O76071	Probable cytosolic iron-sulfur protein assembly protein CIAO1	CIAO1	sp|O76071|CIAO1_HUMAN Probable cytosolic iron-sulfur protein assembly protein CIAO1 OS=Homo sapiens OX=9606 GN=CIAO1 PE=1 SV=1	By matching	By MS/MS	By matching	By matching	By MS/MS	By matching	By MS/MS	By MS/MS	17	21789000	2157600	2511700	821220	1039200	2836100	353130	7274400	4795800
O76094	O76094	Signal recognition particle subunit SRP72	SRP72	sp|O76094|SRP72_HUMAN Signal recognition particle subunit SRP72 OS=Homo sapiens OX=9606 GN=SRP72 PE=1 SV=3	By MS/MS	By MS/MS	By MS/MS	By MS/MS	By MS/MS	By MS/MS	By MS/MS	By MS/MS	32	234200000	19674000	17064000	14698000	37785000	42313000	22428000	37898000	42344000
O94763	O94763	Unconventional prefoldin RPB5 interactor 1	URI1	sp|O94763|RMP_HUMAN Unconventional prefoldin RPB5 interactor 1 OS=Homo sapiens OX=9606 GN=URI1 PE=1 SV=3	By MS/MS	By MS/MS	By MS/MS	By matching	By matching	By MS/MS	By MS/MS	By MS/MS	21	31804000	2467400	6281800	7116900	655390	639890	5125200	4759300	4758200
O94776	O94776	Metastasis-associated protein MTA2	MTA2	sp|O94776|MTA2_HUMAN Metastasis-associated protein MTA2 OS=Homo sapiens OX=9606 GN=MTA2 PE=1 SV=1	By MS/MS	By MS/MS	By MS/MS	By MS/MS	By MS/MS	By MS/MS	By MS/MS	By MS/MS	40	120710000	6800900	7072000	7048200	34477000	30447000	8108300	13055000	13705000
O94782	O94782	Ubiquitin carboxyl-terminal hydrolase 1;Ubiquitin carboxyl-terminal hydrolase 1, N-terminal fragment	USP1	sp|O94782|UBP1_HUMAN Ubiquitin carboxyl-terminal hydrolase 1 OS=Homo sapiens OX=9606 GN=USP1 PE=1 SV=1	By MS/MS	By MS/MS	By MS/MS	None	By matching	By MS/MS	By MS/MS	By MS/MS	37	14436000	1803400	1924100	3015900	0	630770	2427600	2505000	2129500
O94822	O94822	E3 ubiquitin-protein ligase listerin	LTN1	sp|O94822|LTN1_HUMAN E3 ubiquitin-protein ligase listerin OS=Homo sapiens OX=9606 GN=LTN1 PE=1 SV=6	By matching	By matching	By matching	By matching	By MS/MS	By matching	By matching	By MS/MS	90	1744600	84257	99357	120220	241990	434710	100090	277930	386040
O94826	O94826	Mitochondrial import receptor subunit TOM70	TOMM70	sp|O94826|TOM70_HUMAN Mitochondrial import receptor subunit TOM70 OS=Homo sapiens OX=9606 GN=TOMM70 PE=1 SV=1	By MS/MS	By matching	By MS/MS	By MS/MS	By MS/MS	By MS/MS	By MS/MS	By MS/MS	32	187270000	13844000	1711600	5068400	68856000	67859000	3572100	3333700	23025000
O94832	O94832	Unconventional myosin-Id	MYO1D	sp|O94832|MYO1D_HUMAN Unconventional myosin-Id OS=Homo sapiens OX=9606 GN=MYO1D PE=1 SV=2	By MS/MS	By MS/MS	By MS/MS	By MS/MS	By MS/MS	By MS/MS	By MS/MS	By MS/MS	62	5778400	510510	516490	703410	811240	1354200	521200	563440	797950
O94842;Q96NM4;O15405;O94900	O94842;Q96NM4;O15405	TOX high mobility group box family member 4;TOX high mobility group box family member 2;TOX high mobility group box family member 3	TOX4;TOX2;TOX3	sp|O94842|TOX4_HUMAN TOX high mobility group box family member 4 OS=Homo sapiens OX=9606 GN=TOX4 PE=1 SV=1;sp|Q96NM4|TOX2_HUMAN TOX high mobility group box family member 2 OS=Homo sapiens OX=9606 GN=TOX2 PE=1 SV=2;sp|O15405|TOX3_HUMAN TOX high mobility gro	By matching	By matching	By matching	By MS/MS	By MS/MS	None	By matching	By MS/MS	15	12617000	938270	727950	230140	4699000	4871500	0	825200	1282600
O94851;Q7RTP6	O94851	[F-actin]-monooxygenase MICAL2	MICAL2	sp|O94851|MICA2_HUMAN [F-actin]-monooxygenase MICAL2 OS=Homo sapiens OX=9606 GN=MICAL2 PE=1 SV=2	By matching	By matching	By matching	By MS/MS	By MS/MS	None	None	By matching	97	2115000	168700	65326	60150	686410	736250	0	0	398190
O94874	O94874	E3 UFM1-protein ligase 1	UFL1	sp|O94874|UFL1_HUMAN E3 UFM1-protein ligase 1 OS=Homo sapiens OX=9606 GN=UFL1 PE=1 SV=2	By MS/MS	By matching	By matching	By MS/MS	By MS/MS	By MS/MS	By MS/MS	By MS/MS	46	11759000	878640	580860	764460	2935500	3411200	903410	524190	1761000
O94885	O94885	SAM and SH3 domain-containing protein 1	SASH1	sp|O94885|SASH1_HUMAN SAM and SH3 domain-containing protein 1 OS=Homo sapiens OX=9606 GN=SASH1 PE=1 SV=3	None	None	None	None	By MS/MS	None	None	None	58	233780	0	0	0	0	233780	0	0	0
O94901	O94901	SUN domain-containing protein 1	SUN1	sp|O94901|SUN1_HUMAN SUN domain-containing protein 1 OS=Homo sapiens OX=9606 GN=SUN1 PE=1 SV=4	None	None	By matching	By MS/MS	By MS/MS	None	By matching	By matching	39	3377500	0	0	99534	833140	1303900	0	827420	413030
O94905	O94905	Erlin-2	ERLIN2	sp|O94905|ERLN2_HUMAN Erlin-2 OS=Homo sapiens OX=9606 GN=ERLIN2 PE=1 SV=1	By MS/MS	By matching	By matching	By MS/MS	By MS/MS	By MS/MS	By MS/MS	By MS/MS	21	40753000	1770900	1221200	952770	12895000	9397700	3158600	4538700	6817800
O94906	O94906	Pre-mRNA-processing factor 6	PRPF6	sp|O94906|PRP6_HUMAN Pre-mRNA-processing factor 6 OS=Homo sapiens OX=9606 GN=PRPF6 PE=1 SV=1	By MS/MS	By MS/MS	By MS/MS	By MS/MS	By MS/MS	By MS/MS	By MS/MS	By MS/MS	56	65989000	3744200	1569800	1740200	22418000	21525000	2308500	2909800	9773800
O94913	O94913	Pre-mRNA cleavage complex 2 protein Pcf11	PCF11	sp|O94913|PCF11_HUMAN Pre-mRNA cleavage complex 2 protein Pcf11 OS=Homo sapiens OX=9606 GN=PCF11 PE=1 SV=3	None	None	None	By MS/MS	By MS/MS	None	None	By matching	81	1413300	0	0	0	623840	639440	0	0	149990
O94919	O94919	Endonuclease domain-containing 1 protein	ENDOD1	sp|O94919|ENDD1_HUMAN Endonuclease domain-containing 1 protein OS=Homo sapiens OX=9606 GN=ENDOD1 PE=1 SV=2	By MS/MS	By matching	By MS/MS	By MS/MS	By matching	By matching	By MS/MS	By matching	24	7847900	616000	411160	501110	1808200	1631200	540970	1204600	1134800
O94925	O94925	Glutaminase kidney isoform, mitochondrial;Glutaminase kidney isoform, mitochondrial 68 kDa chain;Glutaminase kidney isoform, mitochondrial 65 kDa chain	GLS	sp|O94925|GLSK_HUMAN Glutaminase kidney isoform, mitochondrial OS=Homo sapiens OX=9606 GN=GLS PE=1 SV=1	By MS/MS	By MS/MS	By MS/MS	By MS/MS	By MS/MS	By MS/MS	By MS/MS	By MS/MS	34	158250000	13105000	11018000	10537000	27392000	29333000	13628000	25407000	27830000
O94973	O94973	AP-2 complex subunit alpha-2	AP2A2	sp|O94973|AP2A2_HUMAN AP-2 complex subunit alpha-2 OS=Homo sapiens OX=9606 GN=AP2A2 PE=1 SV=2	By matching	By matching	By matching	By MS/MS	By MS/MS	By matching	By MS/MS	By MS/MS	47	7114200	589680	389960	912680	1221700	1227400	467820	1036200	1268700
O94992	O94992	Protein HEXIM1	HEXIM1	sp|O94992|HEXI1_HUMAN Protein HEXIM1 OS=Homo sapiens OX=9606 GN=HEXIM1 PE=1 SV=1	By MS/MS	By MS/MS	By MS/MS	By MS/MS	By MS/MS	By MS/MS	By MS/MS	By MS/MS	11	52535000	4756400	4856900	5036300	5475200	6006500	8214700	9700400	8488700
O95070	O95070	Protein YIF1A	YIF1A	sp|O95070|YIF1A_HUMAN Protein YIF1A OS=Homo sapiens OX=9606 GN=YIF1A PE=1 SV=2	None	None	None	By MS/MS	By MS/MS	None	None	By matching	8	8788100	0	0	0	4434000	3657900	0	0	696180
[truncated: 2,509 more rows]

## Sheet: OriginFiringFactors
No change
Protein IDs	Protein names	Gene names	Average iBAQ-Control	Average iBAQ-Sample (+BHB)	p-Value	FC
O43913	Origin recognition complex subunit 5	ORC5	21.9452	20.4352	0.301492	-1.51003
[truncated: 48 more rows]
